# Supplementary material for: Dissecting plant-associated bacterial genetic architecture on host performance reveals discrepancies among contrasted environments
Source: Research Square preprint supplement (doi:10.21203/rs.3.rs-8144237/v1), 2025-12-03
Supplement: Supplementary file 1 [file 310cf37645a586d612edded2.pdf]

## **Supporting information for:**

# Dissecting plant-associated bacterial genetic architecture on host development reveals discrepancies among contrasted environments

Rémi Duflos<sup>1</sup>, Anaïs Botello<sup>1</sup>, Baptiste Mayjonade<sup>1</sup>, Sébastien Carrere<sup>1</sup>, Céline Lopez-Roques<sup>2</sup>, Marine Sallaberry<sup>2</sup>, Claudia Bartoli-Kautsky<sup>1</sup>, Fabienne Vailleau<sup>1\*</sup>, and Fabrice Roux<sup>1\*</sup>

<sup>1</sup> LIPME, INRAE, CNRS, Université de Toulouse, Castanet-Tolosan, France

<sup>2</sup> Institut National de la Recherche Agronomique, US 1426, GeT-PlaGe, Genotoul, Castanet-Tolosan, France

\* To whom correspondence may be addressed: Fabrice Roux and Fabienne Vailleau.

**Email:** [fabrice.roux@inrae.fr](mailto:fabrice.roux@inrae.fr), [fabienne.vailleau@inrae.fr](mailto:fabienne.vailleau@inrae.fr)

This document includes Supplementary Figures 1 to 3.

**Supplementary Figure 1. Experimental framework used to isolate, characterize, and select the 74 *Pseudomonas siliginis* strains used in this study.** Strains were isolated from 152 *Arabidopsis thaliana* natural populations located in the southwest of France, using two complementary approaches. **Approach 1** consisted of directly plating homogenized *A. thaliana* rosettes on TSA/10 medium. The resulting isolates were purified and characterized by sequencing a 250 bp fragment of the *gyrB* gene. Six strains were previously purified by this method<sup>1</sup>. In addition, the 365 isolates were purified on TSA selective medium and the resulting strains were sequenced with the 1kb *gyrB* marker. **Approach 2** involved using a selective TSA medium supplemented with antibiotics specific to the *Pseudomonas* genus. In this second approach, strain identification was performed using a 1 kb *gyrB* sequence. By using both approaches and a combination of selection criteria, we identified 74 *P. siliginis* strains for setting up BGWAS.

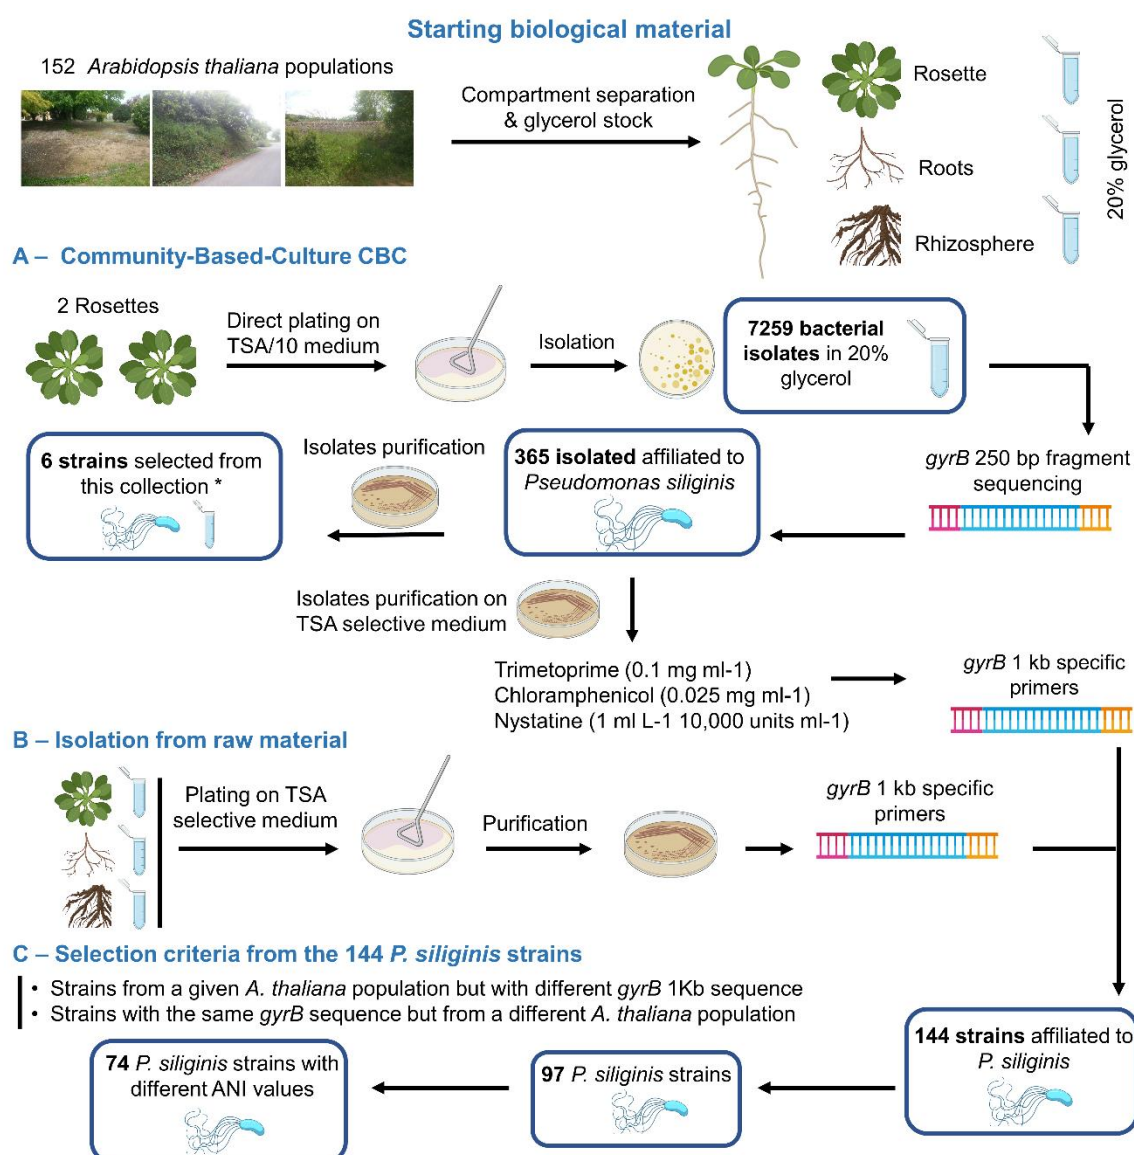

\* Ramirez-Sanchez et al., 2022. *Front. Microbiol.*

**Supplementary Fig. 2: Length of the core, accessory, and private genes.** Gene length is expressed in bp. Core genome: N = 4365 genes, accessory genome: N = 3731 genes, private genome: N = 1974. Different letters indicate different groups after a Tukey correction for multiple pairwise comparisons at  $P = 0.05$ .

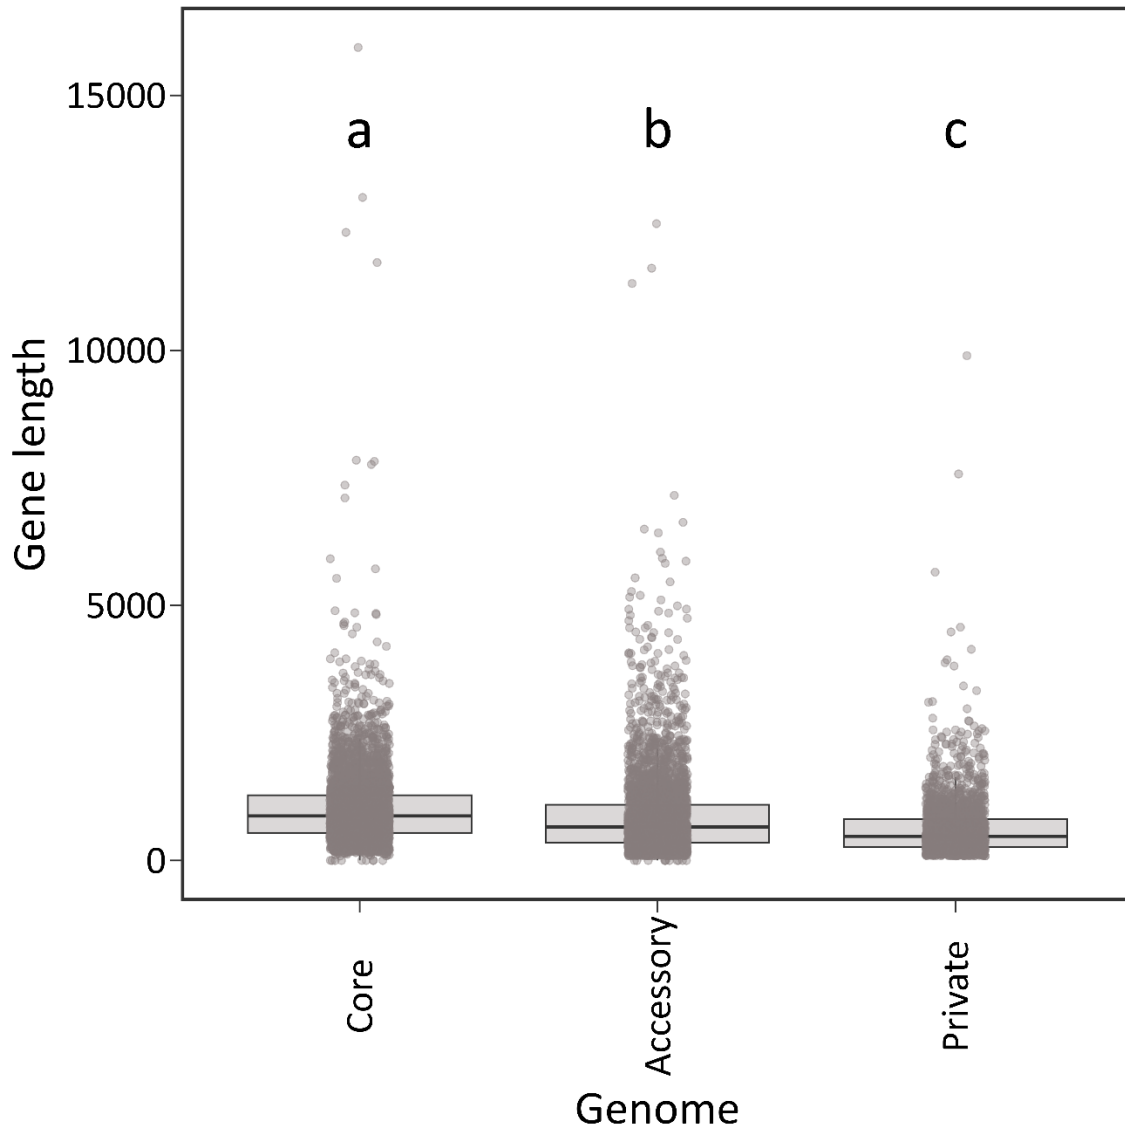

**Supplementary Fig. 3: Variation among the 74 *P. siliginis* strains for the number of genes belonging to the 41 functional classes of the Type 4 of Plant Growth-Promoting Traits using the PLaBase database.** Strains isolated from the AMBR-A and ANGE-B *A. thaliana* populations are highlighted by blue and green dots, respectively.

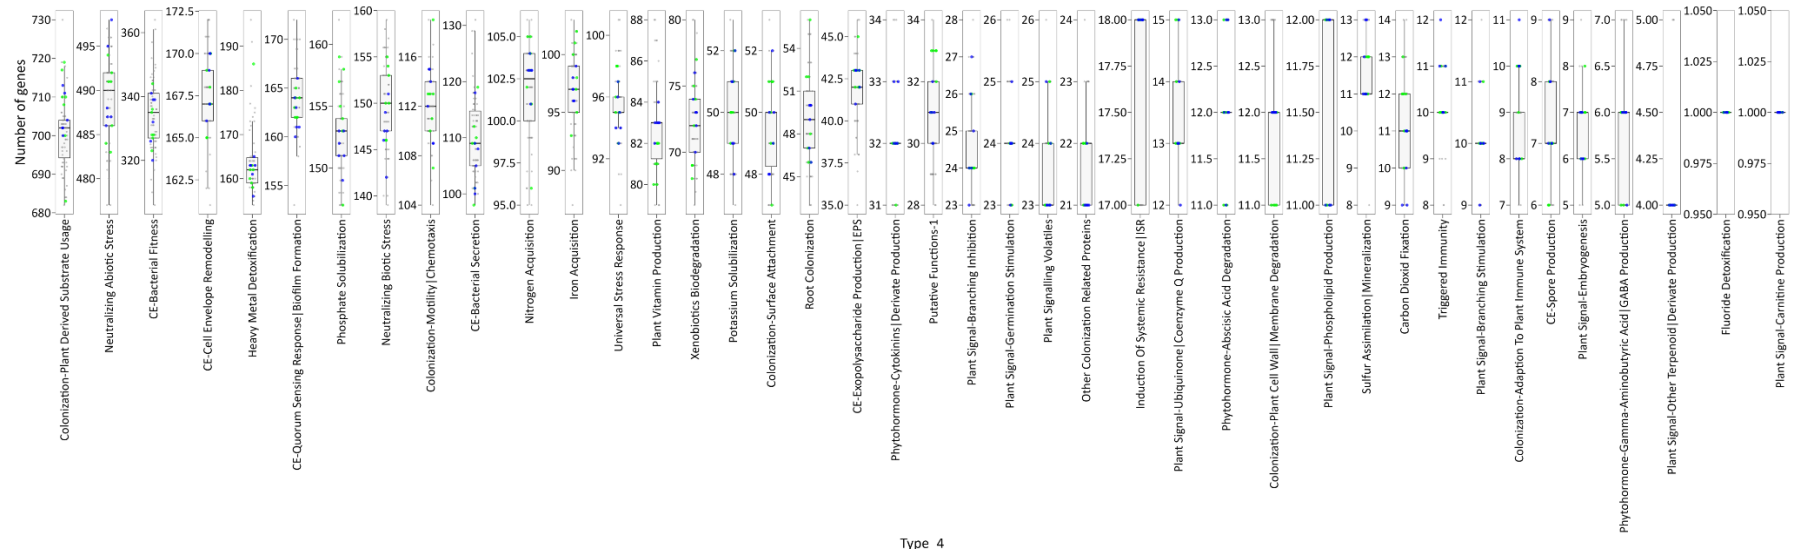

## References

1. Ramírez-Sánchez, D. *et al.* Investigating genetic diversity within the most abundant and prevalent non-pathogenic leaf-associated bacteria interacting with *Arabidopsis thaliana* in natural habitats. *Front. Microbiol.* **13**, 984832 (2022).
