# Supplementary material for: Dissecting plant-associated bacterial genetic architecture on host performance reveals discrepancies among contrasted environments
Source: Research Square preprint supplement (doi:10.21203/rs.3.rs-8144237/v1), 2025-12-03
Supplement: Supplementary file 1 [file a6cca530ba94f4b5b488969a.xlsx]

## Sheet: S1
Supplementary Data 1. Information regarding the location and plant compartment of the 97 strains isolated in this study, along with a summary of the assembly and annotation characteristics for the 96 whole-genome-sequenced strains. Clones from the same population are indicated in red. The strains underlined in bold red correspond to the strains chosen among the clones to be part of the set of 74 …
Species	A. thaliana population of isolation	Latitude	Longitude	Habitat	Compartment	Initial name	Sample name (NCBI)	Biosample (NCBI)	Name used in this study	Mean read length (bp)	Mean coverage	Total assembly length (bp)	Chromosome size (bp)	Number of plasmids	Plasmid size (bp)	G + C content (%)	Number of genes	Number of coding sequences (CDS)	rRNA	tRNA	%ANI	No_SNPs_MAC_10*	Core (%)	Accessory (%)	Private (%)	gyrB amplicon sequence
P. siliginis	AMBR-A	43.7332	1.82387	Bareground	Phyllosphere	AMBR-A-8L1	AMBRA8L1	SAMN50083443	OTU6_Psi_10	11445	27.308	5872722	5872722	0		60	5322	5153	16	71	95.6863	275587	85.2206	14.5061	0.273331	TTGAGCGAAGAAAATACGTACGACTCAACGAGCATTAAAGTGCTGAAAGGCCTGGATGCCGTACGCAAACGTCCCGGTATGTACATTGGTGACACCGACGATGGCAGCGGTCTGCACCACATGGTGTTCGAGGTGGTCGACAACTCGATCGACGAAGCCCTCGCCGGCCATTGCGACGACATCAGCATCATCATTCACCCGGACGAATCCATCACCGTTAAAGACAACGGTCGTGGCATCCCGGTAGACGTGCATAAAGAGGAAGGCGTTTCCGCCGCAGAGGTCATCATGACCGTCCTCCACGCTGGCGGTAAGTTCGACGACAACTCCTACAAAGTATCCGGCGGTCTGCACGGCGTAGGTGTGTCGGTGGTGAACGCGCTGTCCGAAGAACTGGTC…
P. siliginis	AMBR-A	43.7332	1.82387	Bareground	Phyllosphere	AMBR-A-9L2	AMBRA9L2	SAMN50083446	OTU6_Psi_13	10959	40.3914	5932337	5932337	0		60	5382	5202	16	77	96.2754	272868	84.4294	15.4545	0.116054	TTGAGCGAAGAAAATACGTACGACTCAACGAGCATTAAAGTGCTGAAAGGCCTGGATGCCGTACGCAAACGTCCCGGTATGTACATTGGTGACACCGACGATGGCAGCGGTCTGCACCACATGGTGTTCGAGGTGGTCGACAATTCGATCGACGAAGCCCTCGCCGGCCATTGCGACGACATCAGCATCATCATCCACCCGGACGAATCCATCACCGTTAAAGACAACGGTCGCGGCATCCCGGTAGACGTGCATAAAGAGGAAGGCGTTTCCGCCGCAGAGGTCATCATGACCGTCCTCCACGCTGGCGGTAAGTTCGACGACAACTCCTACAAGGTTTCCGGCGGTCTGCACGGTGTAGGTGTTTCGGTAGTGAACGCACTGTCCGAAGAGCTGGTC…
P. siliginis	AMBR-A	43.7332	1.82387	Bareground	Roots	AMBR-2-A5R-6	AMBR2A5R6	SAMN50083438	OTU6_Psi_7	10844	25.7825	5920742	5920742	0		60	5402	5218	16	76	96.2401	272792	84.299	15.45	0.251062	TTGAGCGAAGAAAATACGTACGACTCAACGAGCATTAAAGTGCTGAAAGGCCTGGATGCCGTACGCAAACGTCCCGGTATGTACATTGGTGACACCGACGATGGCAGCGGTCTGCACCACATGGTGTTCGAGGTGGTCGACAACTCGATCGACGAAGCCCTCGCCGGCCATTGCGACGACATCAGCATCATCATCCACCCGGACGAATCCATCACCGTTAAAGACAACGGTCGTGGCATCCCGGTAGACGTGCATAAAGAGGAAGGCGTTTCCGCCGCCGAGGTCATCATGACCGTCCTCCACGCTGGCGGTAAGTTCGACGACAACTCCTACAAGGTATCCGGCGGTCTGCACGGTGTAGGTGTGTCGGTAGTGAACGCACTGTCCGAAGAACTGGTC…
P. siliginis	AMBR-A	43.7332	1.82387	Bareground	Roots	AMBR-A-8R4	AMBRA8R4	SAMN50083444	OTU6_Psi_11	11414	25.6035	6013762	6013762	0		60	5451	5279	16	70	96.2102	272473	83.397	16.0298	0.573175	TTGAGCGAAGAAAATACGTACGACTCAACGAGCATTAAAGTGCTGAAAGGCCTGGATGCCGTACGCAAACGTCCCGGTATGTACATTGGTGACACCGACGATGGCAGCGGTCTGCACCACATGGTGTTCGAGGTGGTCGACAACTCGATCGACGAAGCCCTCGCCGGCCATTGCGACGACATCAGCATAATCATCCACCCGGACGAATCCATCACCGTTAAAGACAACGGTCGTGGCATCCCGGTAGACGTGCATAAAGAGGAAGGCGTTTCTGCCGCTGAGGTCATCATGACCGTCCTCCACGCTGGCGGTAAGTTCGACGACAACTCCTACAAGGTATCCGGCGGTCTGCACGGCGTAGGTGTGTCGGTAGTGAACGCGCTGTCCGAAGAACTGGTC…
P. siliginis	AMBR-A	43.7332	1.82387	Bareground	Roots	AMBR-A-8R5	AMBRA8R5	SAMN50083445	OTU6_Psi_12	10539	33.548	6027454	6027454	0		60	5544	5366	16	71	96.175	273515	82.0797	17.5818	0.338473	TTGAGCGAAGAAAATACGTACGACTCAACGAGCATTAAAGTGCTGAAAGGCCTGGATGCCGTACGCAAACGTCCCGGTATGTACATTGGTGACACCGACGATGGCAGCGGTCTGCACCACATGGTGTTCGAGGTGGTCGACAACTCGATCGACGAAGCCCTCGCCGGCCATTGCGACGACATCAGCATCATCATCCACCCGGACGAGTCCATCACCGTTAAAGACAACGGTCGTGGCATCCCGGTAGACGTGCATAAAGAGGAAGGCGTTTCTGCCGCTGAGGTCATCATGACCGTCCTCCACGCTGGCGGTAAGTTCGACGACAACTCCTACAAGGTATCCGGCGGTCTGCACGGCGTAGGTGTGTCGGTAGTGAACGCGCTGTCCGAAGAACTGGTC…
P. siliginis	AMBR-A	43.7332	1.82387	Bareground	Roots	AMBR-2-A6R-4	AMBR2A6R4	SAMN50083441	AMBR-2-A6R-4	11509	48.9034	6118627	6118627	0		60	5674	5498	16	71	96.2501	/	/	/	/	TTGAGCGAAGAAAATACGTACGACTCAACGAGCATTAAAGTGCTGAAAGGCCTGGATGCCGTACGCAAACGTCCCGGTATGTACATTGGTGACACCGACGATGGCAGCGGTCTGCACCACATGGTGTTCGAGGTGGTCGACAACTCGATCGACGAAGCCCTCGCCGGCCATTGCGACGACATCAGCATAATCATCCACCCGGACGAATCCATCACCGTTAAAGACAACGGTCGTGGCATCCCGGTAGACGTGCATAAAGAGGAAGGCGTTTCTGCCGCTGAGGTCATCATGACCGTCCTCCACGCTGGCGGTAAGTTCGACGACAACTCCTACAAGGTATCCGGCGGTCTGCACGGCGTAGGTGTGTCGGTAGTGAACGCGCTGTCCGAAGAACTGGTC…
P. siliginis	AMBR-A	43.7332	1.82387	Bareground	Roots	AMBR-2-A6R-2	AMBR2A6R2	SAMN50083440	OTU6_Psi_9	11236	25.2395	6118629	6118629	0		60	5673	5497	16	71	96.2501	273109	80.7436	18.6459	0.610433	TTGAGCGAAGAAAATACGTACGACTCAACGAGCATTAAAGTGCTGAAAGGCCTGGATGCCGTACGCAAACGTCCCGGTATGTACATTGGTGACACCGACGATGGCAGCGGTCTGCACCACATGGTGTTCGAGGTGGTCGACAACTCGATCGACGAAGCCCTCGCCGGCCATTGCGACGACATCAGCATAATCATCCACCCGGACGAATCCATCACCGTTAAAGACAACGGTCGTGGCATCCCGGTAGACGTGCATAAAGAGGAAGGCGTTTCTGCCGCTGAGGTCATCATGACCGTCCTCCACGCTGGCGGTAAGTTCGACGACAACTCCTACAAGGTATCCGGCGGTCTGCACGGCGTAGGTGTGTCGGTAGTGAACGCGCTGTCCGAAGAACTGGTC…
P. siliginis	AMBR-A	43.7332	1.82387	Bareground	Roots	AMBR-2-A6R-6	AMBR2A6R6	SAMN50083442	AMBR-2-A6R-6	10328	37.4152	6118629	6118629	0		60	5673	5497	16	71	96.2501	/	/	/	/	TTGAGCGAAGAAAATACGTACGACTCAACGAGCATTAAAGTGCTGAAAGGCCTGGATGCCGTACGCAAACGTCCCGGTATGTACATTGGTGACACCGACGATGGCAGCGGTCTGCACCACATGGTGTTCGAGGTGGTCGACAACTCGATCGACGAAGCCCTCGCCGGCCATTGCGACGACATCAGCATAATCATCCACCCGGACGAATCCATCACCGTTAAAGACAACGGTCGTGGCATCCCGGTAGACGTGCATAAAGAGGAAGGCGTTTCTGCCGCTGAGGTCATCATGACCGTCCTCCACGCTGGCGGTAAGTTCGACGACAACTCCTACAAGGTATCCGGCGGTCTGCACGGCGTAGGTGTGTCGGTAGTGAACGCGCTGTCCGAAGAACTGGTC…
P. siliginis	AMBR-A	43.7332	1.82387	Bareground	Rhizosphere	AMBR-2-A5RH-3	AMBR2A5RH3	SAMN50083439	OTU6_Psi_8	11479	30.5424	6181840	6181840	0		60	5698	5516	16	75	96.1444	271796	81.0134	17.3905	1.59614	TTGAGCGAAGAAAATACGTACGACTCAACGAGCATTAAAGTGCTGAAAGGCCTGGATGCCGTACGCAAACGTCCCGGTATGTACATTGGTGACACCGACGATGGCAGCGGTCTGCACCACATGGTGTTCGAGGTGGTCGACAACTCGATCGACGAAGCCCTCGCCGGCCATTGCGACGACATCAGCATCATCATCCACCCGGACGAGTCCATCACCGTTAAAGACAACGGTCGTGGCATCCCGGTAGACGTGCATAAAGAGGAAGGCGTTTCCGCCGCTGAGGTCATCATGACCGTCCTCCACGCTGGCGGTAAGTTCGACGACAACTCCTACAAGGTTTCCGGCGGTCTGCACGGTGTAGGTGTGTCGGTAGTGAACGCACTGTCCGAAGAACTGGTC…
P. siliginis	ANGE-A	43.912	1.65665	Bareground	Phyllosphere	ANGE-A-P24-B09	ANGEAP24B09	SAMN50083450	OTU6_Psi_16	11634	25.6919	5994526	5994526	0		60	5457	5276	16	73	95.3749	269591	83.5087	16.1852	0.306103	TTGAGCGAAGAAAATACGTACGACTCAACGAGCATTAAAGTGCTGAAAGGCCTGGATGCCGTACGCAAACGTCCCGGTATGTACATTGGTGACACCGACGATGGCAGCGGTCTGCACCACATGGTGTTCGAGGTGGTCGACAACTCGATCGACGAAGCCCTCGCCGGCCATTGCGACGACATCAGCATCATCATCCACCCGGACGAATCCATCACCGTTAAAGACAACGGTCGTGGCATCCCGGTAGACGTGCATAAAGAGGAAGGCGTTTCCGCCGCTGAGGTCATCATGACCGTCCTCCACGCTGGCGGTAAGTTCGACGACAACTCCTACAAGGTTTCCGGCGGTCTGCACGGTGTAGGTGTTTCGGTAGTGAACGCACTGTCCGAAGAGCTGGTC…
P. siliginis	ANGE-B	43.9121	1.65685	Bareground	Phyllosphere	ANGE-2-B5L3	ANGE2B5L3	SAMN50083447	ANGE-2-B5L3	10859	32.2919	5924270	5924270	0		60	5408	5230	16	72	96.237	/	/	/	/	TTGAGCGAAGAAAATACGTACGACTCAACGAGCATTAAAGTGCTGAAAGGCCTGGATGCCGTACGCAAACGTCCCGGTATGTACATTGGTGACACCGACGATGGCAGCGGTCTGCACCACATGGTGTTCGAGGTGGTCGACAACTCGATCGACGAAGCCCTCGCCGGCCATTGCGACGACATCAGCATCATCATCCACCCGGACGAGTCCATCACCGTTAAAGACAACGGTCGTGGCATCCCGGTAGACGTGCATAAAGAGGAAGGCGTTTCCGCCGCTGAGGTCATCATGACCGTCCTCCACGCTGGCGGTAAGTTCGACGACAACTCCTACAAGGTTTCCGGCGGTCTGCACGGTGTAGGTGTGTCGGTAGTGAACGCACTGTCCGAAGAACTGGTC…
P. siliginis	ANGE-B	43.9121	1.65685	Bareground	Phyllosphere	ANGE-B-P02-B08	ANGEBP02B08	SAMN50083452	OTU6_Psi_18	10550	21.6605	5924272	5924272	0		60	5405	5227	16	72	96.2369	273836	84.1851	15.7184	0.096432	TTGAGCGAAGAAAATACGTACGACTCAACGAGCATTAAAGTGCTGAAAGGCCTGGATGCCGTACGCAAACGTCCCGGTATGTACATTGGTGACACCGACGATGGCAGCGGTCTGCACCACATGGTGTTCGAGGTGGTCGACAACTCGATCGACGAAGCCCTCGCCGGCCATTGCGACGACATCAGCATCATCATCCACCCGGACGAGTCCATCACCGTTAAAGACAACGGTCGTGGCATCCCGGTAGACGTGCATAAAGAGGAAGGCGTTTCCGCCGCTGAGGTCATCATGACCGTCCTCCACGCTGGCGGTAAGTTCGACGACAACTCCTACAAGGTTTCCGGCGGTCTGCACGGTGTAGGTGTGTCGGTAGTGAACGCACTGTCCGAAGAACTGGTC…
P. siliginis	ANGE-B	43.9121	1.65685	Bareground	Phyllosphere	ANGE-B-P02-A07	ANGEBP02A07	SAMN50083451	OTU6_Psi_17	11405	51.5982	5989710	5989710	0		60	5468	5289	16	71	95.6643	273476	83.3652	16.2529	0.381971	TTGAGCGAAGAAAATACGTACGACTCAACGAGCATTAAAGTGCTGAAAGGCCTGGATGCCGTACGCAAACGTCCCGGTATGTACATTGGTGACACCGACGATGGCAGCGGTCTGCACCACATGGTGTTCGAGGTGGTCGACAACTCGATCGACGAAGCCCTCGCCGGCCATTGCGACGACATCAGCATCATCATCCACCCGGACGAATCCATCACCGTTAAAGACAACGGTCGTGGCATCCCGGTAGACGTGCATAAAGAAGAAGGCGTTTCCGCCGCCGAGGTCATCATGACCGTCCTCCACGCTGGCGGTAAGTTCGACGACAACTCCTACAAGGTTTCCGGCGGTCTGCACGGTGTAGGTGTGTCGGTAGTGAACGCACTGTCCGAAGAGCTGGTC…
P. siliginis	ANGE-B	43.9121	1.65685	Bareground	Phyllosphere	ANGE-B-P02-B10	ANGEBP02B10	SAMN50083453	OTU6_Psi_19	11457	40.0328	5996628	5996628	0		60	5487	5308	16	76	96.1539	274290	83.3015	16.2405	0.458015	TTGAGCGAAGAAAATACGTACGACTCAACGAGCATTAAAGTGCTGAAAGGCCTGGATGCCGTACGCAAACGTCCCGGTATGTACATTGGTGACACCGACGATGGCAGCGGTCTGCACCACATGGTGTTCGAGGTGGTCGACAACTCGATCGACGAAGCCCTCGCCGGCCATTGCGACGACATCAGCATCATCATCCACCCGGACGAATCCATCACCGTTAAAGACAACGGTCGTGGCATCCCGGTAGACGTGCATAAAGAGGAAGGCGTTTCCGCCGCCGAGGTCATCATGACCGTCCTCCACGCTGGCGGAAAGTTCGACGACAACTCCTACAAGGTTTCCGGCGGTCTGCACGGTGTAGGTGTTTCGGTAGTGAACGCATTGTCCGAAGAGCTGGTC…
P. siliginis	ANGE-B	43.9121	1.65685	Bareground	Phyllosphere	ANGE-2-B6L-1	ANGE2B6L1	SAMN50083448	OTU6_Psi_14	10370	37.316	6078624	5997197	1	81427	60	5583	5405	16	75	96.1747	275260	81.6346	16.5139	1.85151	TTGAGCGAAGAAAATACGTACGACTCAACGAGCATTAAAGTGCTGAAAGGCCTGGATGCCGTACGCAAACGTCCCGGTATGTACATTGGTGACACCGACGATGGCAGCGGTCTGCACCACATGGTGTTCGAGGTGGTCGACAACTCGATCGACGAAGCCCTCGCCGGCCATTGCGACGACATCAGCATCATCATCCACCCGGACGAGTCCATCACCGTTAAAGACAACGGTCGTGGCATCCCGGTAGACGTGCATAAAGAGGAAGGCGTTTCCGCCGCCGAGGTCATCATGACCGTCCTCCACGCTGGCGGTAAGTTCGACGACAACTCCTACAAGGTTTCCGGCGGTCTGCACGGTGTAGGTGTTTCGGTAGTGAACGCACTGTCCGAAGAGCTGGTC…
P. siliginis	ANGE-B	43.9121	1.65685	Bareground	Phyllosphere	ANGE-2-B6L-2	ANGE2B6L2	SAMN50083449	OTU6_Psi_15	10770	38.0422	6044884	6044884	0		60	5466	5289	16	72	95.4273	268273	83.2697	16.158	0.572301	TTGAGCGAAGAAAATACGTACGACTCAACGAGCATTAAAGTGCTGAAAGGCCTGGATGCCGTACGCAAACGTCCCGGTATGTACATTGGTGACACCGACGATGGCAGCGGTCTGCACCACATGGTGTTCGAGGTGGTCGACAACTCGATCGACGAAGCCCTCGCCGGCCATTGCGACGACATCAGCATCATCATCCACCCGGACGAGTCCATCACCGTTAAAGACAACGGTCGTGGCATCCCGGTAGACGTGCATAAAGAGGAAGGCGTTTCTGCCGCTGAGGTCATCATGACCGTCCTCCACGCTGGCGGTAAGTTCGACGACAACTCCTACAAGGTTTCCGGCGGTCTGCACGGTGTAGGTGTTTCGGTAGTGAACGCACTGTCCGAAGAGCTGGTC…
P. siliginis	ANGE-B	43.9121	1.65685	Bareground	Phyllosphere	ANGE-B-P02-H10	ANGEBP02H10	SAMN50083454	OTU6_Psi_20	9224	31.5541	6057143	6057143	0		60	5515	5340	16	72	95.4014	268849	82.5454	17.1142	0.340393	TTGAGCGAAGAAAATACGTACGACTCAACGAGTATTAAAGTGCTGAAAGGCCTGGATGCCGTACGCAAACGTCCCGGTATGTACATTGGTGACACCGACGATGGCAGCGGTCTGCACCACATGGTGTTCGAGGTGGTCGACAACTCGATCGACGAAGCCCTCGCCGGCCATTGCGACGACATCAGCATCATCATCCACCCGGACGAATCCATCACCGTTAAAGACAACGGTCGTGGCATCCCGGTAGACGTGCATAAAGAGGAAGGCGTTTCCGCCGCTGAGGTCATCATGACCGTCCTCCACGCTGGCGGTAAGTTCGACGACAACTCCTACAAGGTTTCCGGCGGTCTGCACGGTGTAGGTGTTTCGGTAGTGAACGCACTGTCCGAAGAGCTGGTC…
P. siliginis	AXLE-B	42.7246	1.8335	Bareground	Phyllosphere	AXLE-B-P46-E08	AXLEBP46E08	SAMN50083455	OTU6_Psi_21	11476	28.7367	5912772	5912772	0		60	5362	5187	16	71	95.7031	273798	84.8726	14.7774	0.34999	TTGAGCGAAGAAAATACGTACGACTCAACGAGCATTAAAGTGCTGAAAGGCCTGGATGCCGTACGCAAACGTCCCGGTATGTACATTGGTGACACCGACGATGGCAGCGGTCTGCACCACATGGTGTTCGAGGTGGTCGACAACTCGATCGACGAAGCCCTCGCCGGCCATTGCGACGACATCAGCATCATCATTCACCCGGACGAATCCATCACCGTTAAAGACAACGGTCGTGGCATCCCGGTAGACGTGCATAAAGAGGAAGGCGTTTCCGCCGCAGAGGTCATCATGACCGTCCTCCACGCTGGCGGTAAGTTCGACGACAACTCCTACAAAGTATCCGGCGGTCTGCACGGCGTAGGTGTGTCGGTGGTGAACGCGCTGTCCGAAGAACTGGTC…
P. siliginis	BACC-B	43.3122	1.51517	Grassland	Phyllosphere	BACC-B-6L-1	BACCB6L1	SAMN50083456	OTU6_Psi_22	10680	34.7396	6065159	6065159	0		60	5602	5427	16	71	96.2027	272512	81.5735	17.9966	0.429826	TTGAGCGAAGAAAATACGTACGACTCAACGAGCATTAAAGTGCTGAAAGGCCTGGATGCCGTACGCAAACGTCCCGGTATGTACATTGGTGACACCGACGATGGCAGCGGTCTGCACCACATGGTGTTCGAGGTGGTCGACAACTCGATCGACGAAGCCCTCGCCGGCCATTGCGACGACATCAGCATCATCATCCACCCGGACGAGTCCATCACCGTTAAAGACAACGGTCGTGGCATCCCGGTAGACGTGCATAAAGAGGAAGGCGTTTCTGCCGCTGAGGTCATCATGACCGTCCTCCACGCTGGCGGTAAGTTCGACGACAACTCCTACAAGGTATCCGGCGGTCTGCACGGCGTAGGTGTGTCGGTAGTGAACGCGCTGTCCGAAGAACTGGTC…
P. siliginis	BAGNB-B	43.0765	0.151533	Grassland	Phyllosphere	BAGNB-B-P30-A12	BAGNBBP30A12	SAMN50083458	OTU6_Psi_2	10968	38.0297	6005108	6005108	0		60	5403	5229	16	72	95.5827	272389	84.5602	15.0329	0.406819	TTGAGCGAAGAAAATACGTACGACTCAACGAGCATTAAAGTGCTGAAAGGCCTGGATGCCGTACGCAAACGTCCCGGTATGTACATTGGTGACACCGACGATGGCAGCGGTCTGCACCACATGGTGTTCGAGGTGGTCGACAACTCGATCGACGAAGCCCTCGCCGGCCATTGCGACGACATCAGCATCATCATTCACCCGGACGAATCCATCACCGTTAAAGACAACGGTCGTGGCATCCCGGTAGACGTGCATAAAGAGGAAGGCGTTTCCGCCGCAGAGGTCATCATGACCGTCCTCCACGCTGGCGGTAAGTTCGACGACAACTCCTACAAAGTATCCGGCGGTCTGCACGGCGTAGGTGTGTCGGTGGTGAACGCGCTGTCCGAAGAACTGGTC…
P. siliginis	BANI-B	43.0436	0.234303	Bareground	Phyllosphere	BANI-B-P49-G01	BANIBP49G01	SAMN50083459	OTU6_Psi_5	10553	35.5775	6095255	5992107	1	103148	60	5598	5423	16	74	95.6992	275886	81.164	17.1997	1.6363	TTGAGCGAAGAAAATACGTACGACTCAACGAGCATTAAAGTGCTGAAAGGCCTGGATGCCGTACGCAAACGTCCCGGTATGTACATTGGTGACACCGACGATGGCAGCGGTCTGCACCACATGGTGTTCGAAGTGGTCGACAACTCGATCGACGAAGCCCTCGCCGGCCATTGCGACGACATCAGCATCATCATTCACCCGGACGAATCCATCACCGTTAAAGACAACGGTCGTGGCATCCCGGTAGACGTGCATAAAGAGGAAGGCGTTTCCGCCGCAGAGGTCATCATGACCGTCCTCCACGCTGGCGGTAAGTTCGACGACAACTCCTACAAAGTATCCGGCGGTCTGCACGGCGTAGGTGTGTCGGTGGTGAACGCGCTGTCCGAAGAACTGGTC…
P. siliginis	BANI-C	43.0436	0.234303	Bareground	Phyllosphere	BANI-C-P24-D01	BANICP24D01	SAMN50083460	OTU6_Psi_23	11800	34.3067	6056074	6021332	1	34742	60	5600	5418	16	75	96.1828	272447	81.6498	17.8638	0.486345	TTGAGCGAAGAAAATACGTACGACTCAACGAGCATTAAAGTGCTGAAAGGCCTGGATGCCGTACGCAAACGTCCCGGTATGTACATTGGTGACACCGACGATGGCAGCGGTCTGCACCACATGGTGTTCGAGGTGGTCGACAACTCGATCGACGAAGCCCTCGCCGGCCATTGCGACGACATCAGCATAATCATCCACCCGGACGAATCCATCACCGTTAAAGACAACGGTCGTGGCATCCCGGTAGACGTGCATAAAGAGGAAGGCGTTTCTGCCGCTGAGGTCATCATGACCGTCCTCCACGCTGGCGGTAAGTTCGACGACAACTCCTACAAGGTATCCGGCGGTCTGCACGGCGTAGGTGTGTCGGTAGTGAACGCGCTGTCCGAAGAACTGGTC…
P. siliginis	BAZI-A	43.4536	1.62067	Bareground	Phyllosphere	BAZI-A-P03-C02	BAZIAP03C02	SAMN50083464	OTU6_Psi_26	11972	38.1917	5954616	5954616	0		60	5417	5238	16	77	96.2624	273025	83.8617	16.0615	0.0768492	TTGAGCGAAGAAAATACGTACGACTCAACGAGCATTAAAGTGCTGAAAGGCCTGGATGCCGTACGCAAACGTCCCGGTATGTACATTGGTGACACCGACGATGGCAGCGGTCTGCACCACATGGTGTTCGAGGTGGTCGACAATTCGATCGACGAAGCCCTCGCCGGCCATTGCGACGACATCAGCATCATCATCCACCCGGACGAATCCATCACCGTTAAAGACAACGGTCGCGGCATCCCGGTAGACGTGCATAAAGAGGAAGGCGTTTCCGCCGCAGAGGTCATCATGACCGTCCTCCACGCTGGCGGTAAGTTCGACGACAACTCCTACAAGGTTTCCGGCGGTCTGCACGGTGTAGGTGTTTCGGTAGTGAACGCACTGTCCGAAGAGCTGGTC…
P. siliginis	BAZI-A	43.4536	1.62067	Bareground	Phyllosphere	BAZI-A-P03-G01	BAZIAP03G01	SAMN50083467	OTU6_Psi_28	11775	41.7074	5999525	5999525	0		60	5521	5342	16	74	96.1592	273751	82.5922	16.9726	0.435194	TTGAGCGAAGAAAATACGTACGACTCAACGAGCATTAAAGTGCTGAAAGGCCTGGATGCCGTACGCAAACGTCCCGGTATGTACATTGGTGACACCGACGATGGCAGCGGTCTGCACCACATGGTGTTCGAGGTGGTCGACAACTCGATCGACGAAGCCCTCGCCGGCCATTGCGACGACATCAGCATCATCATCCACCCGGACGAATCCATCACCGTTAAAGACAACGGTCGTGGCATCCCGGTAGACGTGCATAAAGAGGAAGGCGTTTCCGCCGCCGAGGTCATCATGACCGTCCTCCACGCTGGCGGAAAGTTCGACGACAACTCCTACAAGGTTTCCGGCGGTCTGCACGGTGTAGGTGTTTCGGTAGTGAACGCATTGTCCGAAGAGCTGGTC…
P. siliginis	BAZI-A	43.4536	1.62067	Bareground	Phyllosphere	BAZI-2-A5L-6	BAZI2A5L6	SAMN50083463	OTU6_Psi_25	11071	27.8882	6024734	6024734	0		60	5503	5322	16	77	96.2475	273082	82.6392	17.039	0.321848	TTGAGCGAAGAAAATACGTACGACTCAACGAGCATTAAAGTGCTGAAAGGCCTGGATGCCGTACGCAAACGTCCCGGTATGTACATTGGTGACACCGACGATGGCAGCGGTCTGCACCACATGGTGTTCGAGGTGGTCGACAATTCGATCGACGAAGCCCTCGCCGGCCATTGCGACGACATCAGCATCATCATCCACCCGGACGAATCCATCACCGTTAAAGACAACGGTCGCGGCATCCCGGTAGACGTGCATAAAGAGGAAGGCGTTTCCGCCGCAGAGGTCATCATGACCGTCCTCCACGCTGGCGGTAAGTTCGACGACAACTCCTACAAGGTTTCCGGCGGTCTGCACGGTGTAGGTGTTTCGGTAGTGAACGCACTGTCCGAAGAGCTGGTC…
P. siliginis	BAZI-A	43.4536	1.62067	Bareground	Phyllosphere	BAZI-A-P03-E04	BAZIAP03E04	SAMN50083465	OTU6_Psi_27	11077	38.3231	6068425	6068425	0		60	5543	5361	16	77	96.1701	273930	82.3274	17.4651	0.207469	TTGAGCGAAGAAAATACGTACGACTCAACGAGCATTAAAGTGCTGAAAGGCCTGGATGCCGTACGCAAACGTCCCGGTATGTACATTGGTGACACCGACGATGGCAGCGGTCTGCACCACATGGTGTTCGAGGTGGTCGACAACTCGATCGACGAAGCCCTCGCCGGCCATTGCGACGACATCAGCATCATCATCCACCCGGACGAATCCATCACCGTTAAAGACAACGGTCGTGGCATCCCGGTAGACGTGCATAAAGAGGAAGGCGTTTCCGCCGCCGAGGTCATCATGACCGTCCTCCACGCTGGCGGTAAGTTCGACGACAACTCCTACAAGGTTTCCGGCGGTCTGCACGGTGTAGGTGTTTCGGTAGTGAACGCATTGTCCGAAGAGCTGGTC…
P. siliginis	BAZI-A	43.4536	1.62067	Bareground	Phyllosphere	BAZI-2-A5L-1	BAZI2A5L1	SAMN50083461	OTU6_Psi_24	11343	28.8414	6089754	6089754	0		60	5545	5366	16	76	96.2056	273740	82.1415	17.5762	0.282273	TTGAGCGAAGAAAATACGTACGACTCAACGAGCATTAAAGTGCTGAAAGGCCTGGATGCCGTACGCAAACGTCCCGGTATGTACATTGGTGACACCGACGATGGCAGCGGTCTGCACCACATGGTGTTCGAGGTGGTCGACAACTCGATCGACGAAGCCCTCGCCGGCCATTGCGACGACATCAGCATCATCATCCACCCGGACGAATCCATCACCGTTAAAGACAACGGTCGTGGCATCCCGGTAGACGTGCATAAAGAGGAAGGCGTTTCCGCCGCCGAGGTCATCATGACCGTCCTCCACGCTGGCGGTAAGTTCGACGACAACTCCTACAAGGTTTCCGGCGGTCTGCACGGTGTAGGTGTTTCGGTAGTGAACGCATTGTCCGAAGAGCTGGTC…
P. siliginis	BELL-A	43.7903	1.10646	Grassland	Roots	BELL-A-2-5R1	BELLA25R1	SAMN50083468	OTU6_Psi_29	10895	20.6134	5939446	5939446	0		60	5436	5260	16	74	96.1274	271175	83.8456	15.9047	0.249712	TTGAGCGAAGAAAATACGTACGACTCAACGAGCATTAAAGTGCTGAAAGGCCTGGATGCCGTACGCAAACGTCCCGGTATGTACATTGGTGACACCGACGATGGCAGCGGTCTGCACCACATGGTGTTCGAGGTGGTCGACAACTCGATCGACGAAGCCCTCGCCGGCCATTGCGACGACATCAGCATCATCATCCACCCGGACGAATCCATCACCGTTAAAGACAACGGTCGTGGCATCCCGGTAGACGTGCATAAAGAGGAAGGCGTTTCCGCCGCCGAGGTCATCATGACCGTCCTCCACGCTGGCGGTAAGTTCGACGACAACTCCTACAAGGTATCCGGCGGTCTGCACGGTGTAGGTGTGTCGGTAGTGAACGCACTGTCCGAAGAACTGGTC…
P. siliginis	BULA-A	43.0398	0.277297	Bareground	Phyllosphere	BULA-A-P03-G10	BULAAP03G10	SAMN50083469	OTU6_Psi_30	11779	31.268	6070274	6035907	1	34367	60	5560	5386	16	71	96.2821	273193	81.9411	17.1766	0.882298	TTGAGCGAAGAAAATACGTACGACTCAACGAGCATTAAAGTGCTGAAAGGCCTGGATGCCGTACGCAAACGTCCCGGTATGTACATTGGTGACACCGACGATGGCAGCGGTCTGCACCACATGGTGTTCGAGGTGGTCGACAACTCGATCGACGAAGCCCTCGCCGGCCATTGCGACGACATCAGCATAATCATCCACCCGGACGAATCCATCACCGTTAAAGACAACGGTCGTGGCATCCCGGTAGACGTGCATAAAGAGGAAGGCGTTTCTGCCGCTGAGGTCATCATGACCGTCCTCCACGCTGGCGGTAAGTTCGACGACAACTCCTACAAGGTATCCGGCGGTCTGCACGGCGTAGGTGTGTCGGTAGTGAACGCGCTGTCCGAAGAACTGGTC…
P. siliginis	CAPE-A	44.1085	1.99017	Meadow	Roots	CAPE-A-2-6R2	CAPEA26R2	SAMN50083471	OTU6_Psi_31	11007	30.9117	5954653	5954653	0		60	5440	5265	16	75	95.6687	275637	83.0796	16.673	0.247431	TTGAGCGAAGAAAATACGTACGACTCAACGAGCATTAAAGTGCTGAAAGGCCTGGATGCCGTACGCAAACGTCCCGGTATGTACATTGGTGACACCGACGATGGCAGCGGTCTGCACCACATGGTGTTCGAGGTGGTCGACAACTCGATCGACGAAGCCCTCGCCGGCCATTGCGACGACATCAGCATCATCATTCACCCGGACGAATCCATCACCGTTAAAGACAACGGTCGTGGCATCCCGGTAGACGTGCATAAAGAGGAAGGCGTTTCCGCCGCAGAGGTCATCATGACCGTCCTCCACGCTGGCGGTAAGTTCGACGACAACTCCTACAAAGTATCCGGCGGTCTGCACGGCGTAGGTGTGTCGGTGGTGAACGCGCTGTCCGAAGAACTGGTC…
P. siliginis	CAST-A	43.6985	1.42786	Grassland	Phyllosphere	CAST-A-P27-F01	CASTAP27F01	SAMN50083475	OTU6_Psi_34	11647	26.0384	5913978	5913978	0		60	5351	5177	16	71	95.6992	272182	85.0214	14.628	0.350604	TTGAGCGAAGAAAATACGTACGACTCAACGAGCATTAAAGTGCTGAAAGGCCTGGATGCCGTACGCAAACGTCCCGGTATGTACATTGGTGACACCGACGATGGCAGCGGTCTGCACCACATGGTGTTCGAGGTGGTCGACAACTCGATCGACGAAGCCCTCGCCGGCCATTGCGACGACATCAGCATCATCATCCACCCGGACGAGTCCATCACCGTTAAAGACAACGGTCGTGGCATCCCGGTAGACGTGCATAAAGAGGAAGGCGTTTCCGCCGCCGAGGTCATCATGACCGTCCTCCACGCTGGCGGTAAGTTCGACGACAACTCCTACAAGGTTTCCGGCGGTCTGCACGGTGTAGGTGTGTCGGTAGTGAACGCACTGTCCGAAGAGCTGGTC…
P. siliginis	CAST-A	43.6985	1.42786	Grassland	Phyllosphere	CAST-A-P27-B04	CASTAP27B04	SAMN50083474	OTU6_Psi_33	12258	17.2217	5914724	5914724	0		60	5431	5257	16	71	96.2179	272287	83.6047	16.1272	0.268148	TTGAGCGAAGAAAATACGTACGACTCAACGAGCATTAAAGTGCTGAAAGGCCTGGATGCCGTACGCAAACGTCCCGGTATGTACATTGGTGACACCGACGATGGCAGCGGTCTGCACCACATGGTGTTCGAGGTGGTCGACAACTCGATCGACGAAGCCCTCGCCGGCCATTGCGACGACATCAGCATCATCATCCACCCGGACGAGTCCATCACCGTTAAAGACAACGGTCGTGGCATCCCGGTAGACGTGCATAAAGAGGAAGGCGTTTCTGCCGCTGAGGTCATCATGACCGTCCTCCACGCTGGCGGTAAGTTCGACGACAACTCCTACAAGGTATCCGGCGGTCTGCACGGCGTAGGTGTGTCGGTAGTGAACGCGCTGTCCGAAGAACTGGTC…
P. siliginis	CAST-A	43.6985	1.42786	Grassland	Phyllosphere	CAST-A-P27-A05	CASTAP27A05	SAMN50083473	OTU6_Psi_32	10664	31.3853	5951608	5951608	0		60	5543	5365	16	75	96.1438	271025	82.6392	15.3351	2.02575	TTGAGCGAAGAAAATACGTACGACTCAACGAGCATTAAAGTGCTGAAAGGCCTGGATGCCGTACGCAAACGTCCCGGTATGTACATTGGTGACACCGACGATGGCAGCGGTCTGCACCACATGGTGTTCGAGGTGGTCGACAACTCCATCGACGAAGCCCTCGCCGGCCATTGCGACGACATCAGCATCATCATCCACCCGGACGAATCCATCACCGTTAAAGACAACGGTCGTGGCATCCCGGTAGACGTGCATAAAGAGGAAGGCGTTTCCGCCGCCGAGGTCATCATGACCGTCCTCCACGCTGGCGGTAAGTTCGACGACAACTCCTACAAGGTATCCGGCGGTCTGCACGGTGTAGGTGTGTCGGTAGTGAACGCACTGTCCGAAGAACTGGTC…
P. siliginis	CAST-A	43.6985	1.42786	Grassland	Phyllosphere	CAST-A-P27-G06	CASTAP27G06	SAMN50083476	OTU6_Psi_35	11301	32.5635	6033546	6033546	0		60	5538	5364	16	70	96.163	273398	82.4986	17.2368	0.2646	TTGAGCGAAGAAAATACGTACGACTCAACGAGCATTAAAGTGCTGAAAGGCCTGGATGCCGTACGCAAACGTCCCGGTATGTACATTGGTGACACCGACGATGGCAGCGGTCTGCACCACATGGTGTTCGAGGTGGTCGACAACTCGATCGACGAAGCCCTCGCCGGCCATTGCGACGACATCAGCATCATCATCCACCCGGACGAGTCCATCACCGTTAAAGACAACGGTCGTGGCATCCCGGTAGACGTGCATAAAGAGGAAGGCGTTTCCGCCGCTGAGGTCATCATGACCGTCCTCCACGCTGGCGGTAAGTTCGACGACAACTCCTACAAGGTTTCCGGCGGTCTGCACGGTGTAGGTGTGTCGGTAGTGAACGCACTGTCCGAAGAACTGGTC…
P. siliginis	CEPE-A	43.7552	1.43598	Meadow	Roots	CEPE-A-5R4	CEPEA5R4	SAMN50083477	OTU6_Psi_36	11473	23.2835	5998563	5998563	0		60	5475	5298	16	75	96.1416	273155	83.0006	16.7142	0.285225	TTGAGCGAAGAAAATACGTACGACTCAACGAGCATTAAAGTGCTGAAAGGCCTGGATGCCGTACGCAAACGTCCCGGTATGTACATTGGTGACACCGACGATGGCAGCGGTCTGCACCACATGGTGTTCGAGGTGGTCGACAACTCGATCGACGAAGCCCTCGCCGGCCATTGCGACGACATCAGCATCATCATCCACCCGGACGAATCCATCACCGTTAAAGACAACGGTCGTGGCATCCCGGTAGACGTGCATAAAGAGGAAGGCGTTTCCGCCGCCGAGGTCATCATGACCGTCCTCCACGCTGGCGGAAAGTTCGACGACAACTCCTACAAGGTTTCCGGCGGTCTGCACGGTGTAGGTGTTTCGGTAGTGAACGCATTGTCCGAAGAGCTGGTC…
P. siliginis	CIER-A	42.8533	0.602039	Bareground	Phyllosphere	CIER-A-3L-2	CIERA3L2	SAMN50083478	OTU6_Psi_37	10650	39.0196	5934655	5934655	0		60	5368	5195	16	74	95.708	274041	84.7408	14.5991	0.660066	TTGAGCGAAGAAAATACGTACGACTCAACGAGCATTAAAGTGCTGAAAGGCCTGGATGCCGTACGCAAACGTCCCGGTATGTACATTGGTGACACCGACGATGGCAGCGGTCTGCACCACATGGTGTTCGAGGTGGTCGACAACTCGATCGACGAAGCCCTCGCCGGCCATTGCGACGACATCAGCATCATCATTCACCCGGACGAATCCATCACCGTTAAAGACAACGGTCGTGGCATCCCGGTAGACGTGCATAAAGAGGAAGGCGTTTCCGCCGCAGAGGTCATCATGACCGTCCTCCACGCTGGCGGTAAGTTCGACGACAACTCCTACAAAGTATCCGGCGGTCTGCATGGCGTAGGTGTGTCGGTGGTGAACGCGCTGTCCGAAGAACTGGTC…
P. siliginis	CINT-A	43.3055	1.52044	Grassland	Phyllosphere	CINT-2-A5L-2	CINT2A5L2	SAMN50083482	OTU6_Psi_39	11423	39.9577	5922854	5849437	1	73417	60	5511	5345	16	71	95.4464	267191	82.8745	15.9863	1.13917	TTGAGCGAAGAAAATACGTACGACTCAACGAGCATTAAAGTGCTGAAAGGCCTGGATGCCGTACGCAAACGTCCCGGTATGTACATTGGTGACACCGACGATGGCAGCGGTCTGCACCACATGGTGTTCGAGGTGGTCGACAACTCAATCGACGAAGCCCTCGCCGGCCATTGCGACGACATCAGCATCATCATCCACCCGGACGAATCCATCACCGTTAAAGACAACGGTCGTGGCATCCCGGTAGACGTGCATAAAGAGGAAGGCGTTTCTGCCGCTGAGGTCATCATGACCGTCCTCCACGCTGGCGGTAAGTTCGACGACAACTCCTACAAGGTTTCCGGCGGTCTGCACGGTGTAGGTGTGTCGGTAGTGAACGCACTGTCCGAAGAACTGGTC…
P. siliginis	CINT-A	43.3055	1.52044	Grassland	Phyllosphere	CINT-2-A5L-5	CINT2A5L5	SAMN50083483	OTU6_Psi_40	11131	33.6685	5921360	5921360	0		60	5407	5231	16	74	96.1234	269803	84.3641	14.8821	0.753769	TTGAGCGAAGAAAATACGTACGACTCAACGAGCATTAAAGTGCTGAAAGGCCTGGATGCCGTACGCAAACGTCCCGGTATGTACATTGGTGACACCGACGATGGCAGCGGTCTGCACCACATGGTGTTCGAGGTGGTCGACAATTCGATCGACGAAGCCCTCGCCGGCCATTGCGACGACATCAGCATCATCATCCACCCGGACGAGTCCATCACCGTTAAAGACAACGGTCGTGGCATCCCGGTAGACGTGCATAAAGAGGAAGGCGTTTCCGCCGCTGAGGTCATCATGACCGTCCTCCACGCTGGCGGTAAGTTCGACGACAACTCCTACAAGGTTTCCGGCGGTCTGCACGGTGTAGGTGTGTCGGTAGTGAACGCACTGTCCGAAGAACTGGTC…
P. siliginis	CINT-A	43.3055	1.52044	Grassland	Phyllosphere	CINT-2-A4L-1	CINT2A4L1	SAMN50083479	CINT-2-A4L-1	11051	35.229	6005367	6005367	0		60	5460	5283	16	72	96.23	/	/	/	/	TTGAGCGAAGAAAATACGTACGACTCAACGAGCATTAAAGTGCTGAAAGGCCTGGATGCCGTACGCAAACGTCCCGGTATGTACATTGGTGACACCGACGATGGCAGCGGTCTGCACCACATGGTGTTCGAGGTGGTCGACAACTCGATCGACGAAGCCCTCGCCGGCCATTGCGACGACATCAGCATCATCATCCACCCGGACGAGTCCATCACCGTTAAAGACAACGGTCGTGGCATCCCGGTAGACGTGCATAAAGAGGAAGGCGTTTCCGCCGCTGAGGTCATCATGACCGTCCTCCACGCTGGCGGTAAGTTCGACGACAACTCCTACAAGGTTTCCGGCGGTCTGCACGGTGTAGGTGTGTCGGTAGTGAACGCACTGTCCGAAGAACTGGTC…
P. siliginis	CINT-A	43.3055	1.52044	Grassland	Phyllosphere	CINT-A-P29-A08	CINTAP29A08	SAMN50083484	OTU6_Psi_41	11713	31.1807	6005368	6005368	0		60	5459	5282	16	72	96.2299	272379	83.3333	16.4185	0.248186	TTGAGCGAAGAAAATACGTACGACTCAACGAGCATTAAAGTGCTGAAAGGCCTGGATGCCGTACGCAAACGTCCCGGTATGTACATTGGTGACACCGACGATGGCAGCGGTCTGCACCACATGGTGTTCGAGGTGGTCGACAACTCGATCGACGAAGCCCTCGCCGGCCATTGCGACGACATCAGCATCATCATCCACCCGGACGAGTCCATCACCGTTAAAGACAACGGTCGTGGCATCCCGGTAGACGTGCATAAAGAGGAAGGCGTTTCCGCCGCTGAGGTCATCATGACCGTCCTCCACGCTGGCGGTAAGTTCGACGACAACTCCTACAAGGTTTCCGGCGGTCTGCACGGTGTAGGTGTGTCGGTAGTGAACGCACTGTCCGAAGAACTGGTC…
P. siliginis	CINT-A	43.3055	1.52044	Grassland	Phyllosphere	CINT-2-A4L-2	CINT2A4L2	SAMN50083480	CINT-2-A4L-2	9829	31.5065	6124088	6052153	1	71935	60	5631	5446	16	76	96.1978	/	/	/	/	TTGAGCGAAGAAAATACGTACGACTCAACGAGCATTAAAGTGCTGAAAGGCCTGGATGCCGTACGCAAACGTCCCGGTATGTACATTGGTGACACCGACGATGGCAGCGGTCTGCACCACATGGTGTTCGAGGTGGTCGACAACTCGATCGACGAAGCCCTCGCCGGCCATTGCGACGACATCAGCATCATCATCCACCCGGACGAGTCCATCACCGTTAAAGACAACGGTCGTGGCATCCCGGTAGACGTGCATAAAGAGGAAGGCGTTTCCGCCGCCGAGGTCATCATGACCGTCCTCCACGCTGGCGGTAAGTTCGACGACAACTCCTACAAGGTTTCCGGCGGTCTGCACGGTGTAGGTGTGTCGGTAGTGAACGCACTGTCCGAAGAGCTGGTC…
P. siliginis	CINT-A	43.3055	1.52044	Grassland	Phyllosphere	CINT-A-P29-C07	CINTAP29C07	SAMN50083485	OTU6_Psi_42	11817	28.3197	6124088	6052153	1	71935	60	5631	5446	16	76	96.1978	272785	81.467	17.4505	1.08249	TTGAGCGAAGAAAATACGTACGACTCAACGAGCATTAAAGTGCTGAAAGGCCTGGATGCCGTACGCAAACGTCCCGGTATGTACATTGGTGACACCGACGATGGCAGCGGTCTGCACCACATGGTGTTCGAGGTGGTCGACAACTCGATCGACGAAGCCCTCGCCGGCCATTGCGACGACATCAGCATCATCATCCACCCGGACGAGTCCATCACCGTTAAAGACAACGGTCGTGGCATCCCGGTAGACGTGCATAAAGAGGAAGGCGTTTCCGCCGCCGAGGTCATCATGACCGTCCTCCACGCTGGCGGTAAGTTCGACGACAACTCCTACAAGGTTTCCGGCGGTCTGCACGGTGTAGGTGTGTCGGTAGTGAACGCACTGTCCGAAGAGCTGGTC…
P. siliginis	CINT-A	43.3055	1.52044	Grassland	Phyllosphere	CINT-A-P29-G08	CINTAP29G08	SAMN50083487	OTU6_Psi_43	11526	12.3277	6071454	6071454	0		60	5559	5381	16	76	96.1541	272413	82.2344	17.257	0.508666	TTGAGCGAAGAAAATACGTACGACTCAACGAGCATTAAAGTGCTGAAAGGCCTGGATGCCGTACGCAAACGTCCCGGTATGTACATTGGTGACACCGACGATGGCAGCGGTCTGCACCACATGGTGTTCGAGGTGGTCGACAACTCGATCGACGAAGCCCTCGCCGGCCATTGCGACGACATCAGCATCATCATCCACCCGGACGAATCCATCACCGTTAAAGACAACGGTCGTGGCATCCCGGTAGACGTGCATAAAGAGGAAGGCGTTTCCGCCGCCGAGGTCATCATGACCGTCCTCCACGCTGGCGGAAAGTTCGACGACAACTCCTACAAGGTTTCCGGCGGTCTGCACGGTGTAGGTGTTTCGGTAGTGAACGCATTGTCCGAAGAGCTGGTC…
P. siliginis	CINT-A	43.3055	1.52044	Grassland	Phyllosphere	CINT-2-A4L-5	CINT2A4L5	SAMN50083481	OTU6_Psi_38	10586	48.4595	6191631	3235038 + 2904462	1	52131	60	5602	5423	17	74	95.3746	225904	82.4207	16.7674	0.811934	TTGAGCGAAGAAAATACGTACGACTCAACGAGCATTAAAGTGCTGAAAGGCCTGGATGCCGTACGCAAACGTCCCGGTATGTACATTGGTGACACCGACGATGGCAGCGGTCTGCACCACATGGTGTTCGAGGTGGTCGACAACTCGATCGACGAAGCCCTCGCCGGCCATTGCGACGACATCAGCATCATCATCCACCCGGACGAGTCCATCACCGTTAAAGACAACGGTCGTGGCATCCCGGTAGACGTGCATAAAGAGGAAGGCGTTTCTGCCGCTGAGGTCATCATGACCGTCCTCCACGCTGGCGGTAAGTTCGACGACAACTCCTACAAGGTTTCCGGCGGTCTGCACGGTGTAGGTGTTTCGGTAGTGAACGCACTGTCCGAAGAGCTGGTC…
P. siliginis	DECA-A	44.1999	1.77189	Bareground	Phyllosphere	DECA-A-P43-G09	DECAAP43G09	SAMN50083489	OTU6_Psi_45	11545	25.8976	5883961	5838245	1	45716	60	5375	5201	16	74	95.7046	274140	84.5766	14.5708	0.852548	TTGAGCGAAGAAAATACGTACGACTCAACGAGCATTAAAGTGCTGAAAGGCCTGGATGCCGTACGCAAACGTCCCGGTATGTACATTGGTGACACCGACGATGGCAGCGGTCTGCACCACATGGTGTTCGAGGTGGTCGACAACTCGATCGACGAAGCCCTCGCCGGCCATTGCGACGACATCAGCATCATCATTCACCCGGACGAATCCATCACCGTTAAAGACAACGGTCGTGGCATCCCGGTAGACGTGCATAAAGAGGAAGGCGTTTCCGCCGCAGAGGTCATCATGACCGTCCTCCACGCTGGCGGTAAGTTCGACGACAACTCCTACAAAGTATCCGGCGGTCTGCACGGCGTAGGTGTGTCGGTGGTGAACGCGCTGTCCGAAGAACTGGTC…
P. siliginis	DECA-A	44.1999	1.77189	Bareground	Phyllosphere	DECA-A-P43-C07	DECAAP43C07	SAMN50083488	OTU6_Psi_44	12340	11.643	5951951	5951951	0		60	5404	5228	16	73	95.6434	274030	84.1527	15.7316	0.115674	TTGAGCGAAGAAAATACGTACGACTCAACGAGCATTAAAGTGCTGAAAGGCCTGGATGCCGTACGCAAACGTCCCGGTATGTACATTGGTGACACCGACGATGGCAGCGGTCTGCACCACATGGTGTTCGAGGTGGTCGACAACTCGATCGACGAAGCCCTCGCTGGCCATTGCGACGACATCAGCATCATCATTCACCCGGACGAATCCATCACCGTTAAAGACAACGGTCGTGGCATCCCGGTAGACGTGCATAAAGAGGAAGGCGTTTCCGCCGCAGAGGTCATCATGACCGTCCTCCACGCTGGCGGTAAGTTCGACGACAACTCCTACAAAGTATCCGGCGGTCTGCACGGCGTAGGTGTGTCGGTGGTGAACGCGCTGTCCGAAGAACTGGTC…
P. siliginis	DIEU-A	44.0598	1.22097	Meadow	Rhizosphere	DIEU-A-2-4RH4	DIEUA24RH4	SAMN50083490	OTU6_Psi_46	11428	33.3212	5884801	5884801	0		60	5383	5205	16	72	96.1109	269456	84.6094	14.9254	0.465206	TTGAGCGAAGAAAATACGTACGACTCAACGAGCATTAAAGTGCTGAAAGGCCTGGATGCCGTACGCAAACGTCCCGGTATGTACATTGGTGACACCGACGATGGCAGCGGTCTGCACCACATGGTGTTCGAGGTGGTCGACAACTCGATCGACGAAGCCCTCGCCGGCCATTGCGACGACATCAGCATCATCATCCACCCGGACGAGTCCATCACCGTTAAAGACAACGGTCGTGGCATCCCGGTAGACGTGCATAAAGAGGAAGGCGTGTCCGCCGCCGAGGTCATCATGACCGTCCTCCACGCTGGCGGTAAGTTCGACGACAACTCCTACAAGGTGTCCGGCGGTCTGCACGGCGTAGGTGTGTCGGTAGTGAACGCCCTGTCCGAAGAACTGGTC…
P. siliginis	ESPE-B	43.6933	2.53458	Bareground	Phyllosphere	ESPE-B-P10-F06	ESPEBP10F06	SAMN50083491	OTU6_Psi_1	11357	37.2517	5988843	5988843	0		60	5457	5281	16	73	95.6382	273160	83.3333	16.5712	0.0954563	TTGAGCGAAGAAAATACGTACGACTCAACGAGCATTAAAGTGCTGAAAGGCCTGGATGCCGTACGCAAACGTCCCGGTATGTACATTGGTGACACCGACGATGGCAGCGGTCTGCACCACATGGTGTTCGAGGTGGTCGACAACTCGATCGACGAAGCCCTCGCTGGCCATTGCGACGACATCAGCATCATCATTCACCCGGACGAATCCATCACCGTTAAAGACAACGGTCGTGGCATCCCGGTAGACGTGCATAAAGAGGAAGGCGTTTCCGCCGCAGAGGTCATCATGACCGTCCTCCACGCTGGCGGTAAGTTCGACGACAACTCCTACAAAGTATCCGGCGGTCTGCACGGCGTAGGTGTGTCGGTGGTGAACGCGCTGTCCGAAGAACTGGTC…
P. siliginis	GAIL-B	43.909	1.90108	Bareground	Phyllosphere	GAIL-B-3L1	GAILB3L1	SAMN50083493	OTU6_Psi_48	10856	33.3572	5938551	5938551	0		60	5417	5237	16	78	96.1565	270931	84.1365	15.5744	0.289129	TTGAGCGAAGAAAATACGTACGACTCAACGAGCATTAAAGTGCTGAAAGGCCTGGATGCCGTACGCAAACGTCCCGGTATGTACATTGGTGACACCGACGATGGCAGCGGTCTGCACCACATGGTGTTCGAGGTGGTCGACAACTCGATTGACGAAGCCCTCGCCGGCCATTGCGACGACATCAGCATCATCATCCACCCGGACGAGTCCATCACCGTTAAAGACAACGGTCGTGGCATCCCGGTAGACGTGCATAAAGAGGAAGGCGTTTCCGCCGCCGAGGTCATCATGACCGTCCTCCACGCTGGCGGTAAGTTCGACGACAACTCCTACAAGGTTTCCGGCGGTCTGCACGGTGTAGGTGTGTCGGTAGTGAACGCACTGTCCGAAGAACTGGTC…
P. siliginis	GAIL-B	43.909	1.90108	Bareground	Roots	GAIL-B-1R2	GAILB1R2	SAMN50083492	OTU6_Psi_47	11396	30.8563	6092409	6052485	1	39924	60	5579	5396	16	76	96.2237	273031	82.2034	17.4011	0.39548	TTGAGCGAAGAAAATACGTACGACTCAACGAGCATTAAAGTGCTGAAAGGCCTGGATGCCGTACGCAAACGTCCCGGTATGTACATTGGTGACACCGACGATGGCAGCGGTCTGCACCACATGGTGTTCGAGGTGGTCGACAACTCGATCGACGAAGCCCTCGCCGGCCATTGCGACGACATCAGCATCATCATCCACCCGGACGAATCCATCACCGTTAAAGACAACGGTCGTGGCATCCCGGTAGACGTGCATAAAGAGGAAGGCGTTTCCGCCGCCGAGGTCATCATGACCGTCCTCCACGCTGGCGGTAAGTTCGACGACAACTCCTACAAGGTATCCGGCGGTCTGCACGGTGTAGGTGTGTCGGTAGTGAACGCACTGTCCGAAGAACTGGTC…
P. siliginis	LABA-A	43.4515	1.4005	Bareground	Phyllosphere	LABA-A-P18-B05	LABAAP18B05	SAMN50083495	OTU6_Psi_50	10814	37.9776	5942444	5942444	0		60	5446	5260	16	78	96.1595	274440	83.7651	16.1581	0.0767607	TTGAGCGAAGAAAATACGTACGACTCAACGAGCATTAAAGTGCTGAAAGGCCTGGATGCCGTACGCAAACGTCCCGGTATGTACATTGGTGACACCGACGATGGCAGCGGTCTGCACCACATGGTGTTCGAGGTGGTCGACAACTCGATCGACGAAGCCCTCGCCGGCCATTGCGACGACATCAGCATCATCATCCACCCGGACGAGTCCATCACCGTTAAAGACAACGGTCGTGGCATCCCGGTAGACGTGCATAAAGAGGAAGGCGTTTCCGCCGCCGAGGTCATCATGACCGTCCTCCACGCTGGCGGTAAGTTCGACGACAACTCCTACAAGGTTTCCGGCGGTCTGCACGGTGTAGGTGTGTCGGTAGTGAACGCACTGTCCGAAGAGCTGGTC…
P. siliginis	LABA-A	43.4515	1.4005	Bareground	Phyllosphere	LABA-A-P18-H01	LABAAP18H01	SAMN50083496	OTU6_Psi_51	11202	24.7663	5958158	5958158	0		60	5421	5241	16	77	96.2627	272934	83.91	15.8977	0.192234	TTGAGCGAAGAAAATACGTACGACTCAACGAGCATTAAAGTGCTGAAAGGCCTGGATGCCGTACGCAAACGTCCCGGTATGTACATTGGTGACACCGACGATGGCAGCGGTCTGCACCACATGGTGTTCGAGGTGGTCGACAATTCGATCGACGAAGCCCTCGCCGGCCATTGCGACGACATCAGCATCATCATCCACCCGGACGAATCCATCACCGTTAAAGACAACGGTCGCGGCATCCCGGTAGACGTGCATAAAGAGGAAGGCGTTTCCGCCGCAGAGGTCATCATGACCGTCCTCCACGCTGGCGGTAAGTTCGACGACAACTCCTACAAGGTTTCCGGCGGTCTGCACGGTGTAGGTGTTTCGGTAGTGAACGCACTGTCCGAAGAGCTGGTC…
P. siliginis	LABA-A	43.4515	1.4005	Bareground	Phyllosphere	LABA-A-P18-B03	LABAAP18B03	SAMN50083494	OTU6_Psi_49	11362	32.48	5990091	5990091	0		60	5520	5346	16	71	96.2428	273030	82.3896	17.2329	0.377501	TTGAGCGAAGAAAATACGTACGACTCAACGAGCATTAAAGTGCTGAAAGGCCTGGATGCCGTACGCAAACGTCCCGGTATGTACATTGGTGACACCGACGATGGCAGCGGTCTGCACCACATGGTGTTCGAGGTGGTCGACAACTCGATCGACGAAGCCCTCGCCGGCCATTGCGACGACATCAGCATAATCATCCACCCGGACGAATCCATCACCGTTAAAGACAACGGTCGTGGCATCCCGGTAGACGTGCATAAAGAGGAAGGCGTTTCTGCCGCTGAGGTCATCATGACCGTCCTCCACGCTGGCGGTAAGTTCGACGACAACTCCTACAAGGTATCCGGCGGTCTGCACGGCGTAGGTGTGTCGGTAGTGAACGCGCTGTCCGAAGAACTGGTC…
P. siliginis	LANT-B	43.5649	1.65239	Bareground	Roots	LANT-B-2-6R4	LANTB26R4	SAMN50083499	LANT-B-2-6R4	10618	30.6861	6103413	6103413	0		60	5616	5432	16	76	96.1413	/	/	/	/	TTGAGCGAAGAAAATACGTACGACTCAACGAGCATTAAAGTGCTGAAAGGCCTGGATGCCGTACGCAAACGTCCCGGTATGTACATTGGTGACACCGACGATGGCAGCGGTCTGCACCACATGGTGTTCGAGGTGGTCGACAACTCGATCGACGAAGCCCTCGCCGGCCATTGCGACGACATCAGCATCATCATCCACCCGGACGAATCCATCACCGTTAAAGACAACGGTCGTGGCATCCCGGTAGACGTGCATAAAGAGGAAGGCGTTTCCGCCGCCGAGGTCATCATGACCGTCCTCCACGCTGGCGGTAAGTTCGACGACAACTCCTACAAGGTTTCCGGCGGTCTGCACGGTGTAGGTGTTTCGGTAGTGAACGCATTGTCCGAAGAGCTGGTC…
P. siliginis	LANT-B	43.5649	1.65239	Bareground	Roots	LANT-B-2-6R2	LANTB26R2	SAMN50083498	OTU6_Psi_52	10417	30.6444	6103413	6103413	0		60	5616	5432	16	76	96.1413	272834	81.3455	18.2631	0.391353	TTGAGCGAAGAAAATACGTACGACTCAACGAGCATTAAAGTGCTGAAAGGCCTGGATGCCGTACGCAAACGTCCCGGTATGTACATTGGTGACACCGACGATGGCAGCGGTCTGCACCACATGGTGTTCGAGGTGGTCGACAACTCGATCGACGAAGCCCTCGCCGGCCATTGCGACGACATCAGCATCATCATCCACCCGGACGAATCCATCACCGTTAAAGACAACGGTCGTGGCATCCCGGTAGACGTGCATAAAGAGGAAGGCGTTTCCGCCGCCGAGGTCATCATGACCGTCCTCCACGCTGGCGGTAAGTTCGACGACAACTCCTACAAGGTTTCCGGCGGTCTGCACGGTGTAGGTGTTTCGGTAGTGAACGCATTGTCCGAAGAGCTGGTC…
P. siliginis	LANT-D	43.5648	1.65201	Bareground	Roots	LANT-D-2-5R4	LANTD25R4	SAMN50083501	OTU6_Psi_53	11372	35.8391	6069298	6069298	0		60	5582	5400	16	77	96.1516	272600	82.6079	16.6162	0.775927	TTGAGCGAAGAAAATACGTACGACTCAACGAGCATTAAAGTGCTGAAAGGCCTGGATGCCGTACGCAAACGTCCCGGTATGTACATTGGTGACACCGACGATGGCAGCGGTCTGCACCACATGGTGTTCGAGGTGGTCGACAACTCGATCGACGAAGCCCTCGCCGGCCATTGCGACGACATCAGCATCATCATCCACCCGGACGAATCCATCACCGTTAAAGACAACGGTCGTGGCATCCCGGTAGACGTGCATAAAGAGGAAGGCGTTTCCGCCGCCGAGGTCATCATGACCGTCCTCCACGCTGGCGGAAAGTTCGACGACAACTCCTACAAGGTTTCCGGCGGTCTGCACGGTGTAGGTGTTTCGGTAGTGAACGCATTGTCCGAAGAGCTGGTC…
P. siliginis	LECT-B	43.9117	0.629745	Bareground	Phyllosphere	LECT-B-P56-F09	LECTBP56F09	SAMN50083502	OTU6_Psi_54	12033	32.0552	6033675	6033675	0		60	5487	5307	16	78	96.2295	272798	83.5727	15.6806	0.746697	TTGAGCGAAGAAAATACGTACGACTCAACGAGCATTAAAGTGCTGAAAGGCCTGGATGCCGTACGCAAACGTCCCGGTATGTACATTGGTGACACCGACGATGGCAGCGGTCTGCACCACATGGTGTTCGAGGTGGTCGACAACTCGATCGACGAAGCCCTCGCCGGCCATTGCGACGACATCAGCATCATCATCCACCCGGACGAATCCATCACCGTTAAAGACAACGGTCGTGGCATCCCGGTAGACGTGCATAAAGAGGAAGGCGTTTCCGCCGCCGAGGTCATCATGACCGTCCTCCACGCTGGCGGTAAGTTCGACGACAACTCCTACAAGGTTTCCGGCGGTCTGCACGGTGTAGGTGTTTCGGTAGTGAACGCATTGTCCGAAGAGCTGGTC…
P. siliginis	LOUB-A	43.5743	1.78604	Bareground	Phyllosphere	LOUB-A-P45-B12	LOUBAP45B12	SAMN50083505	OTU6_Psi_55	11992	21.0496	5845969	5845969	0		60	5283	5114	16	70	95.7049	274490	85.7901	14.0723	0.137579	TTGAGCGAAGAAAATACGTACGACTCAACGAGCATTAAAGTGCTGAAAGGCCTGGATGCCGTACGCAAACGTCCCGGTATGTACATTGGTGACACCGACGATGGCAGCGGTCTGCACCACATGGTGTTCGAGGTGGTCGACAACTCGATCGACGAAGCCCTCGCCGGCCATTGCGACGACATCAGCATCATCATTCACCCGGACGAATCCATCACCGTTAAAGACAACGGTCGTGGCATCCCGGTAGACGTGCATAAAGAGGAAGGCGTTTCCGCCGCAGAGGTCATCATGACCGTCCTCCACGCTGGCGGTAAGTTCGACGACAACTCCTACAAAGTATCCGGCGGTCTGCATGGCGTAGGTGTGTCGGTGGTGAACGCGCTGTCCGAAGAACTGGTC…
P. siliginis	LOUB-B	43.5746	1.78572	Meadow	Phyllosphere	LOUB-B-P19-D09	LOUBBP19D09	SAMN50083508	OTU6_Psi_57	11188	29.8288	5928556	5928556	0		60	5382	5214	16	72	95.6799	276005	84.4131	15.2002	0.386772	TTGAGCGAAGAAAATACGTACGACTCAACGAGCATTAAAGTGCTGAAAGGCCTGGATGCCGTACGCAAACGTCCCGGTATGTACATTGGTGACACCGACGATGGCAGCGGTCTGCACCACATGGTGTTCGAGGTGGTCGACAACTCGATCGACGAAGCCCTCGCCGGCCATTGCGACGACATCAGCATCATCATTCACCCGGACGAATCCATCACCGTTAAAGACAACGGTCGTGGCATCCCGGTAGACGTGCATAAAGAGGAAGGCGTTTCCGCCGCAGAGGTCATCATGACCGTCCTCCACGCTGGCGGTAAGTTCGACGACAACTCCTACAAAGTATCCGGCGGTCTGCATGGCGTAGGTGTGTCGGTGGTGAACGCGCTGTCCGAAGAACTGGTC…
P. siliginis	LOUB-B	43.5746	1.78572	Meadow	Phyllosphere	LOUB-B-P19-E08	LOUBBP19E08	SAMN50083509	OTU6_Psi_58	11288	30.9856	5964451	5964451	0		60	5390	5211	16	75	95.6618	272972	84.9057	14.8998	0.194515	TTGAGCGAAGAAAATACGTACGACTCAACGAGCATTAAAGTGCTGAAAGGCCTGGATGCCGTACGCAAACGTCCCGGTATGTACATTGGTGACACCGACGATGGCAGCGGTCTGCACCACATGGTGTTCGAGGTGGTCGACAACTCGATCGACGAAGCCCTCGCCGGCCATTGCGACGACATCAGCATCATCATCCACCCGGACGAGTCCATCACCGTTAAAGACAACGGTCGTGGCATCCCGGTAGACGTGCATAAAGAGGAAGGCGTTTCCGCCGCCGAGGTCATCATGACCGTCCTCCACGCTGGCGGTAAGTTCGACGACAACTCCTACAAGGTTTCCGGCGGTCTGCACGGTGTAGGTGTGTCGGTAGTGAACGCACTGTCCGAAGAGCTGGTC…
P. siliginis	LOUB-B	43.5746	1.78572	Meadow	Phyllosphere	LOUB-2-B5L-1	LOUB2B5L1	SAMN50083504	LOUB-2-B5L-1	11480	42.232	6024815	6024815	0		60	5511	5335	16	75	96.1657	/	/	/	/	TTGAGCGAAGAAAATACGTACGACTCAACGAGCATTAAAGTGCTGAAAGGCCTGGATGCCGTACGCAAACGTCCCGGTATGTACATTGGTGACACCGACGATGGCAGCGGTCTACACCACATGGTGTTCGAGGTGGTCGACAACTCGATCGACGAAGCCCTCGCCGGCCATTGCGACGACATCAGCATCATCATCCACCCGGACGAATCCATCACCGTTAAAGACAACGGTCGTGGCATCCCGGTAGACGTGCATAAAGAGGAAGGCGTTTCCGCCGCCGAGGTCATCATGACCGTCCTCCACGCTGGCGGTAAGTTCGACGACAACTCCTACAAGGTATCCGGCGGTCTGCACGGTGTAGGTGTGTCGGTAGTGAACGCACTGTCCGAAGAACTGGTC…
P. siliginis	LOUB-B	43.5746	1.78572	Meadow	Phyllosphere	LOUB-B-P19-D07	LOUBBP19D07	SAMN50083507	OTU6_Psi_56	11928	42.2125	6024817	6024817	0		60	5510	5334	16	75	96.1649	270740	82.9532	16.7047	0.342075	TTGAGCGAAGAAAATACGTACGACTCAACGAGCATTAAAGTGCTGAAAGGCCTGGATGCCGTACGCAAACGTCCCGGTATGTACATTGGTGACACCGACGATGGCAGCGGTCTACACCACATGGTGTTCGAGGTGGTCGACAACTCGATCGACGAAGCCCTCGCCGGCCATTGCGACGACATCAGCATCATCATCCACCCGGACGAATCCATCACCGTTAAAGACAACGGTCGTGGCATCCCGGTAGACGTGCATAAAGAGGAAGGCGTTTCCGCCGCCGAGGTCATCATGACCGTCCTCCACGCTGGCGGTAAGTTCGACGACAACTCCTACAAGGTATCCGGCGGTCTGCACGGTGTAGGTGTGTCGGTAGTGAACGCACTGTCCGAAGAACTGGTC…
P. siliginis	MASS-A	43.4375	0.579271	Grassland	Roots	MASS-A-8R3	MASSA8R3	SAMN50083510	OTU6_Psi_59	11844	29.0022	6031659	6031659	0		60	5511	5333	16	77	96.1791	274549	83.238	16.0183	0.743707	TTGAGCGAAGAAAATACGTACGACTCAACGAGCATTAAAGTGCTGAAAGGCCTGGATGCCGTACGCAAACGTCCCGGTATGTACATTGGTGACACCGACGATGGCAGCGGTCTGCACCACATGGTGTTCGAGGTGGTCGACAACTCGATCGACGAAGCCCTCGCCGGCCATTGCGACGACATCAGCATCATCATCCACCCGGACGAATCCATCACCGTTAAAGACAACGGTCGTGGCATCCCGGTAGACGTGCATAAAGAGGAAGGCGTTTCCGCCGCCGAGGTCATCATGACCGTCCTCCACGCTGGCGGTAAGTTCGACGACAACTCCTACAAGGTTTCCGGCGGTCTGCACGGTGTAGGTGTTTCGGTAGTGAACGCATTGTCCGAAGAGCTGGTC…
P. siliginis	MEDA-A	43.4905	0.461439	Bareground	Phyllosphere	MEDA-A-P01-C04	MEDAAP01C04	SAMN50083511	OTU6_Psi_3	11625	28.8326	5986780	5986780	0		60	5429	5256	16	71	95.6114	271151	83.7169	15.631	0.652091	TTGAGCGAAGAAAATACGTACGACTCAACGAGCATTAAAGTGCTGAAAGGCCTGGATGCCGTACGCAAACGTCCCGGTATGTACATTGGTGACACCGACGATGGCAGCGGTCTGCACCACATGGTGTTCGAGGTGGTCGACAACTCGATCGACGAAGCCCTCGCCGGCCATTGCGACGACATCAGCATCATCATTCACCCGGACGAATCCATCACCGTTAAAGACAACGGTCGTGGCATCCCGGTAGACGTGCATAAAGAGGAAGGCGTCTCCGCCGCAGAGGTCATCATGACCGTCCTCCACGCTGGCGGTAAGTTCGACGACAACTCCTACAAAGTATCCGGCGGTCTGCACGGCGTAGGTGTGTCGGTGGTGAACGCGCTGTCCGAAGAACTGGTC…
P. siliginis	MONE-A	44.1154	2.09472	Meadow	Phyllosphere	MONE-A-P62-D10	MONEAP62D10	SAMN50083512	OTU6_Psi_6	10327	23.3683	5918320	5918320	0		60	5425	5249	16	75	95.6667	274234	83.8295	15.748	0.422508	TTGAGCGAAGAAAATACGTACGACTCAACGAGCATTAAAGTGCTGAAAGGCCTGGATGCCGTACGCAAACGTCCCGGTATGTACATTGGTGACACCGACGATGGCAGCGGTCTGCACCACATGGTGTTCGAGGTGGTCGACAACTCGATCGACGAAGCCCTCGCCGGCCATTGCGACGACATCAGCATCATCATTCACCCGGACGAATCCATCACCGTTAAAGACAACGGTCGTGGCATCCCGGTAGACGTGCATAAAGAGGAAGGCGTTTCCGCCGCCGAGGTCATCATGACCGTCCTCCACGCTGGCGGTAAGTTCGACGACAACTCCTACAAAGTATCCGGCGGTCTGCACGGCGTAGGTGTGTCGGTGGTGAACGCGCTGTCCGAAGAACTGGTC…
P. siliginis	MONT-B	43.8527	1.87354	Meadow	Phyllosphere	MONT-B-P08-C12	MONTBP08C12	SAMN50083513	OTU6_Psi_60	11836	43.9365	5880177	5880177	0		60	5369	5189	16	77	96.208	272734	84.6915	15.1921	0.116414	TTGAGCGAAGAAAATACGTACGACTCAACGAGCATTAAAGTGCTGAAAGGCCTGGATGCCGTACGCAAACGTCCCGGTATGTACATTGGTGACACCGACGATGGCAGCGGTCTGCACCACATGGTGTTCGAGGTGGTCGACAACTCGATCGACGAAGCCCTCGCCGGCCATTGCGACGACATCAGCATCATCATCCACCCGGACGAATCCATCACCGTTAAAGACAACGGTCGTGGCATCCCGGTAGACGTGCATAAAGAGGAAGGCGTTTCCGCCGCCGAGGTCATCATGACCGTCCTCCACGCTGGCGGTAAGTTCGACGACAACTCCTACAAGGTTTCCGGCGGTCTGCACGGTGTAGGTGTTTCGGTAGTGAACGCATTGTCCGAAGAGCTGGTC…
P. siliginis	MONTG-B	43.1273	0.110681	Grassland	Phyllosphere	MONTG-B-P20-B02	MONTGBP20B02	SAMN50083514	OTU6_Psi_61	10792	32.1502	5890706	5890706	0		60	5357	5186	16	71	95.6841	274867	84.6094	14.9254	0.465206	TTGAGCGAAGAAAATACGTACGACTCAACGAGCATTAAAGTGCTGAAAGGCCTGGATGCCGTACGCAAACGTCCCGGTATGTACATTGGTGACACCGACGATGGCAGCGGTCTGCACCACATGGTGTTCGAGGTGGTCGACAACTCGATCGACGAAGCCCTCGCCGGCCATTGCGACGACATCAGCATCATCATTCACCCGGACGAATCCATCACCGTTAAAGACAACGGTCGTGGCATCCCGGTAGACGTGCATAAAGAGGAAGGCGTTTCCGCCGCAGAGGTCATCATGACCGTCCTCCACGCTGGCGGTAAGTTCGACGACAACTCCTACAAAGTATCCGGCGGTCTGCACGGCGTAGGTGTGTCGGTGGTGAACGCGCTGTCCGAAGAACTGGTC…
P. siliginis	MONTI-D	43.3839	0.67257	Bareground	Phyllosphere	MONTI-D-P05-G01	MONTIDP05G01	SAMN50083516	OTU6_Psi_4	10591	27.1625	5915397	5915397	0		60	5377	5205	16	73	95.6874	274855	84.9883	14.6223	0.389408	TTGAGCGAAGAAAATACGTACGACTCAACGAGCATTAAAGTGCTGAAAGGCCTGGATGCCGTACGCAAACGTCCCGGTATGTACATTGGTGACACCGACGATGGCAGCGGTCTGCACCACATGGTGTTCGAGGTGGTCGACAACTCGATCGACGAAGCCCTCGCCGGCCATTGCGACGACATCAGCATCATCATTCACCCGGACGAATCCATCACCGTTAAAGACAACGGTCGTGGCATCCCGGTAGACGTGCATAAAGAGGAAGGCGTTTCCGCCGCAGAGGTCATCATGACCGTCCTCCACGCTGGCGGTAAGTTCGACGACAACTCCTACAAAGTATCCGGCGGTCTGCATGGCGTAGGTGTGTCGGTGGTGAACGCGCTGTCCGAAGAACTGGTC…
P. siliginis	NAUV-C	44.5204	2.42721	Stone wall	Phyllosphere	NAUV-C-P66-H08	NAUVCP66H08	SAMN50083517	OTU6_Psi_62	10905	30.5038	5916696	5916696	0		60	5418	5240	16	73	95.7692	271626	84.1365	15.5166	0.346955	TTGAGCGAAGAAAATACGTACGACTCAACGAGCATTAAAGTGCTGAAAGGCCTGGATGCCGTACGCAAACGTCCCGGTATGTACATTGGTGACACCGACGATGGCAGCGGTCTGCACCACATGGTGTTCGAGGTGGTCGACAACTCGATCGACGAAGCCCTCGCCGGCCATTGCGACGACATCAGCATCATCATCCACCCGGACGAATCCATCACCGTTAAAGACAACGGTCGTGGCATCCCGGTAGACGTGCATAAAGAGGAAGGCGTTTCTGCCGCTGAGGTCATCATGACCGTCCTCCACGCTGGCGGTAAGTTCGACGACAACTCCTACAAGGTTTCCGGCGGTCTGCACGGTGTGGGTGTGTCGGTAGTGAACGCACTGTCCGAAGAACTGGTC…
P. siliginis	RADE-A	44.3452	2.62082	Grassland	Roots	RADE-A5F-4	RADEA5F4	SAMN50083518	OTU6_Psi_63	11918	30.341	5944435	5944435	0		60	5369	5192	16	74	95.7091	274106	84.7408	15.1233	0.135896	TTGAGCGAAGAAAATACGTACGACTCAACGAGCATTAAAGTGCTGAAAGGCCTGGATGCCGTACGCAAACGTCCCGGTATGTACATTGGTGACACCGACGATGGCAGCGGTCTGCACCACATGGTGTTCGAGGTGGTCGACAACTCGATCGACGAAGCCCTCGCCGGCCATTGCGACGACATCAGCATCATCATTCACCCGGACGAATCCATCACCGTTAAAGACAACGGTCGTGGCATCCCGGTAGACGTGCATAAAGAGGAAGGCGTTTCCGCCGCAGAGGTCATCATGACCGTCCTCCACGCTGGCGGTAAGTTCGACGACAACTCCTACAAGGTTTCCGGCGGTCTGCACGGTGTGGGTGTTTCGGTAGTGAACGCACTGTCCGAAGAACTGGTC…
P. siliginis	SAUB-A	43.4649	1.36514	Bareground	Roots	SAUB-A-5R-DANI	SAUBA5RDANI	SAMN50083519	OTU6_Psi_64	11983	63.816	5999406	5999406	0		60	5531	5349	16	78	96.1948	273382	82.5922	16.9536	0.454115	TTGAGCGAAGAAAATACGTACGACTCAACGAGCATTAAAGTGCTGAAAGGCCTGGATGCCGTACGCAAACGTCCCGGTATGTACATTGGTGACACCGACGATGGCAGCGGTCTGCACCACATGGTGTTCGAGGTGGTCGACAACTCGATCGACGAAGCCCTCGCCGGCCATTGCGACGACATCAGCATCATCATCCACCCGGACGAGTCCATCACCGTTAAAGACAACGGTCGTGGCATCCCGGTGGACGTGCATAAAGAGGAAGGCGTTTCCGCCGCCGAGGTCATCATGACCGTCCTCCACGCTGGCGGTAAGTTCGACGACAACTCCTACAAGGTTTCCGGCGGTCTGCACGGTGTAGGTGTGTCGGTAGTGAACGCACTGTCCGAAGAACTGGTC…
P. siliginis	SORE-A	43.4526	2.07248	Meadow	Phyllosphere	SORE-A-P17-C07	SOREAP17C07	SAMN50083521	OTU6_Psi_65	12307	37.8856	5959355	5959355	0		60	5419	5243	16	73	96.2068	274670	84.2827	15.196	0.521336	TTGAGCGAAGAAAATACGTACGACTCAACGAGCATTAAAGTGCTGAAAGGCCTGGATGCCGTACGCAAACGTCCCGGTATGTACATTGGTGACACCGACGATGGCAGCGGTCTGCACCACATGGTGTTCGAGGTGGTCGACAACTCGATCGACGAAGCCCTCGCCGGCCATTGCGACGACATCAGCATCATCATCCACCCGGACGAGTCCATCACCGTTAAAGACAACGGTCGTGGCATCCCGGTAGACGTGCATAAAGAGGAAGGCGTTTCCGCCGCCGAGGTCATCATGACCGTCCTCCACGCTGGCGGTAAGTTCGACGACAACTCCTACAAGGTTTCCGGCGGTCTGCACGGTGTAGGTGTTTCGGTAGTGAACGCACTGTCCGAAGAGCTGGTC…
P. siliginis	TOUR-A	43.1838	0.239089	Bareground	Roots	TOUR-A-8R-4	TOURA8R4	SAMN50083522	OTU6_Psi_66	11152	37.5247	6019487	6019487	0		60	5530	5350	16	74	96.1807	274010	82.561	17.1931	0.245886	TTGAGCGAAGAAAATACGTACGACTCAACGAGCATTAAAGTGCTGAAAGGCCTGGATGCCGTACGCAAACGTCCCGGTATGTACATTGGTGACACCGACGATGGCAGCGGTCTGCACCACATGGTGTTCGAGGTGGTCGACAACTCGATCGACGAAGCCCTCGCCGGCCATTGCGACGACATCAGCATCATCATCCACCCGGACGAATCCATCACCGTTAAAGACAACGGTCGTGGCATCCCGGTAGACGTGCATAAAGAGGAAGGCGTTTCCGCCGCCGAGGTCATCATGACCGTCCTCCACGCTGGCGGAAAGTTCGACGACAACTCCTACAAGGTTTCCGGCGGTCTGCACGGTGTAGGTGTTTCGGTAGTGAACGCATTGTCCGAAGAGCTGGTC…
P. siliginis	VIEL-A	43.6238	2.08962	Grassland	Phyllosphere	VIEL-A-81	VIELA81	SAMN50083523	OTU6_Psi_67	10237	18.7687	6079692	6079692	0		60	5534	5351	16	75	95.3933	268686	82.6705	16.7614	0.568182	TTGAGCGAAGAAAATACGTACGACTCAACGAGCATTAAAGTGCTGAAAGGCCTGGATGCCGTACGCAAACGTCCCGGTATGTACATTGGTGACACCGACGATGGCAGCGGTCTGCACCACATGGTGTTCGAGGTGGTCGACAACTCGATCGACGAAGCCCTCGCCGGCCATTGCGACGACATCAGCATCATCATCCACCCGGACGAATCCATCACCGTTAAAGACAACGGTCGTGGCATCCCGGTAGACGTGCATAAAGAGGAAGGCGTTTCCGCCGCCGAGGTCATCATGACCGTCCTCCACGCTGGCGGTAAGTTCGACGACAACTCCTACAAGGTTTCCGGCGGTCTGCACGGTGTAGGTGTTTCGGTAGTGAACGCACTGTCCGAAGAGCTGGTC…
P. siliginis	VIEL-A	43.6238	2.08962	Grassland	Phyllosphere	VIEL-A-86	VIELA86	SAMN50083524	OTU6_Psi_68	12214	44.643	6115788	6115788	0		60	5558	5379	16	70	95.4256	268722	82.1106	17.6637	0.225734	TTGAGCGAAGAAAATACGTACGACTCAACGAGCATTAAAGTGCTGAAAGGCCTGGATGCCGTACGCAAACGTCCCGGTATGTACATTGGTGACACCGACGATGGCAGCGGTCTGCACCACATGGTGTTCGAGGTGGTCGACAACTCGATCGACGAAGCCCTCGCCGGCCATTGCGACGACATCAGCATCATCATCCACCCGGACGAATCCATCACCGTTAAAGACAACGGTCGTGGCATCCCGGTAGACGTGCATAAAGAGGAAGGCGTTTCCGCCGCTGAGGTCATCATGACCGTCCTCCACGCTGGCGGTAAGTTCGACGACAACTCCTACAAGGTTTCCGGCGGTCTGCACGGTGTAGGTGTGTCGGTAGTGAACGCACTGTCCGAAGAACTTGTC…
P. siliginis	VILLA-A	43.4582	1.38095	Bareground	Phyllosphere	VILLA-A-P15-G06	VILLAAP15G06	SAMN50083529	OTU6_Psi_71	11761	37.0587	6080331	6080331	0		60	5509	5330	16	70	95.4496	268634	82.8116	17.0935	0.0948587	TTGAGCGAAGAAAATACGTACGACTCAACGAGCATTAAAGTGCTGAAAGGCCTGGATGCCGTACGCAAACGTCCCGGTATGTACATTGGTGACACCGACGATGGCAGCGGTCTGCACCACATGGTGTTCGAGGTGGTCGACAACTCGATCGACGAAGCCCTCGCCGGCCATTGCGACGACATCAGCATCATCATCCACCCGGACGAATCCATCACCGTTAAAGACAACGGTCGTGGCATCCCGGTAGACGTGCATAAAGAGGAAGGCGTTTCCGCCGCTGAGGTCATCATGACCGTCCTCCACGCTGGCGGTAAGTTCGACGACAACTCCTACAAGGTTTCCGGCGGTCTGCACGGTGTAGGTGTGTCGGTAGTGAACGCACTGTCCGAAGAACTTGTC…
P. siliginis	VILLA-A	43.4582	1.38095	Bareground	Phyllosphere	VILLA-2-A6L6	VILLA2A6L6	SAMN50083526	VILLA-2-A6L6	10308	27.0905	6080346	6080346	0		60	5508	5329	16	70	95.4482	/	/	/	/	TTGAGCGAAGAAAATACGTACGACTCAACGAGCATTAAAGTGCTGAAAGGCCTGGATGCCGTACGCAAACGTCCCGGTATGTACATTGGTGACACCGACGATGGCAGCGGTCTGCACCACATGGTGTTCGAGGTGGTCGACAACTCGATCGACGAAGCCCTCGCCGGCCATTGCGACGACATCAGCATCATCATCCACCCGGACGAATCCATCACCGTTAAAGACAACGGTCGTGGCATCCCGGTAGACGTGCATAAAGAGGAAGGCGTTTCCGCCGCTGAGGTCATCATGACCGTCCTCCACGCTGGCGGTAAGTTCGACGACAACTCCTACAAGGTTTCCGGCGGTCTGCACGGTGTAGGTGTGTCGGTAGTGAACGCACTGTCCGAAGAACTTGTC…
P. siliginis	VILLA-A	43.4582	1.38095	Bareground	Phyllosphere	VILLA-A-P15-C05	VILLAAP15C05	SAMN50083527	OTU6_Psi_69	11267	39.1216	6133016	6133016	0		60	5663	5489	16	72	95.7263	272177	80.9232	17.7605	1.31628	TTGAGCGAAGAAAATACGTACGACTCAACGAGCATTAAAGTGCTGAAAGGCCTGGATGCCGTACGCAAACGTCCCGGTATGTACATTGGTGACACCGACGATGGCAGCGGTCTGCACCACATGGTGTTCGAGGTGGTCGACAACTCGATCGACGAAGCCCTCGCCGGCCATTGCGACGACATCAGCATCATCATTCACCCGGACGAATCCATCACCGTTAAAGACAACGGTCGTGGCATCCCGGTAGACGTGCATAAAGAGGAAGGCGTTTCCGCCGCTGAGGTCATCATGACCGTCCTCCACGCTGGCGGTAAGTTCGACGACAACTCCTACAAGGTTTCCGGCGGTCTGCACGGTGTGGGTGTGTCGGTAGTGAACGCACTGTCCGAAGAACTGGTC…
P. siliginis	VILLA-A	43.4582	1.38095	Bareground	Phyllosphere	VILLA-A-P15-F03	VILLAAP15F03	SAMN50083528	OTU6_Psi_70	11231	36.0255	6160413	6160413	0		60	5643	5469	16	71	96.2396	273168	80.7138	18.8055	0.480769	TTGAGCGAAGAAAATACGTACGACTCAACGAGCATTAAAGTGCTGAAAGGCCTGGATGCCGTACGCAAACGTCCCGGTATGTACATTGGTGACACCGACGATGGCAGCGGTCTGCACCACATGGTGTTCGAGGTGGTCGACAACTCGATCGACGAAGCCCTCGCCGGCCATTGCGACGACATCAGCATAATCATCCACCCGGACGAATCCATCACCGTTAAAGACAACGGTCGTGGCATCCCGGTAGACGTGCATAAAGAGGAAGGCGTTTCTGCCGCTGAGGTCATCATGACCGTCCTCCACGCTGGCGGTAAGTTCGACGACAACTCCTACAAGGTATCCGGCGGTCTGCACGGCGTAGGTGTGTCGGTAGTGAACGCGCTGTCCGAAGAACTGGTC…
P. siliginis	VILLE-C	43.44	1.67011	Bareground	Phyllosphere	VILLE-C-P16-C09	VILLECP16C09	SAMN50083532	OTU6_Psi_73	5336	37.507	6088372	6088372	0		60	5542	5366	16	72	95.3984	269444	82.2344	17.4265	0.339111	TTGAGCGAAGAAAATACGTACGACTCAACGAGCATTAAAGTGCTGAAAGGCCTGGATGCCGTACGCAAACGTCCCGGTATGTACATTGGTGACACCGACGATGGCAGCGGTCTGCACCACATGGTGTTCGAGGTGGTCGACAACTCGATCGACGAAGCCCTCGCCGGCCATTGCGACGACATCAGCATCATCATCCACCCGGACGAATCCATCACCGTTAAAGACAACGGTCGTGGCATCCCGGTAGACGTGCATAAAGAGGAAGGCGTTTCCGCCGCTGAGGTCATCATGACCGTCCTCCACGCTGGCGGTAAGTTCGACGACAACTCCTACAAGGTTTCCGGCGGTCTGCACGGTGTAGGTGTTTCGGTAGTGAACGCACTGTCCGAAGAGCTGGTC…
P. siliginis	VILLE-C	43.44	1.67011	Bareground	Roots	VILLE-C-5R-1	VILLEC5R1	SAMN50083531	OTU6_Psi_72	11506	28.1259	6092548	6092548	0		60	5566	5386	16	77	95.9648	272419	82.343	16.1856	1.47142	TTGAGCGAAGAAAATACGTACGACTCAACGAGCATTAAAGTGCTGAAAGGCCTGGATGCCGTACGCAAACGTCCCGGTATGTACATTGGTGACACCGACGATGGCAGCGGTCTGCACCACATGGTGTTCGAGGTGGTCGACAACTCGATCGACGAAGCCCTCGCCGGCCATTGCGACGACATCAGCATCATCATTCACCCGGACGAATCCATCACCGTTAAAGACAACGGTCGTGGCATCCCGGTAGACGTGCATAAAGAGGAAGGCGTTTCCGCCGCCGAGGTCATCATGACCGTCCTCCACGCTGGCGGTAAGTTCGACGACAACTCCTACAAGGTTTCCGGCGGTCTGCACGGTGTAGGTGTGTCGGTAGTGAACGCACTGTCTGAAGAGCTGGTC…
P. siliginis	VILLE-D	43.4397	1.67071	Bareground	Roots	VILLE-D-2-5R1	VILLED25R1	SAMN50083533	OTU6_Psi_74	10905	29.3062	6132843	6132843	0		60	5675	5489	16	79	96.1542	274347	81.6957	17.8926	0.411754	TTGAGCGAAGAAAATACGTACGACTCAACGAGCATTAAAGTGCTGAAAGGCCTGGATGCCGTACGCAAACGTCCCGGTATGTACATTGGTGACACCGACGATGGCAGCGGTCTGCACCACATGGTGTTCGAGGTGGTCGACAACTCGATCGACGAAGCCCTCGCCGGCCATTGCGACGACATCAGCATCATCATCCACCCGGACGAATCCATCACCGTTAAAGACAACGGTCGTGGCATCCCGGTAGACGTGCATAAAGAGGAAGGCGTTTCCGCCGCCGAGGTCATCATGACCGTCCTCCACGCTGGCGGTAAGTTCGACGACAACTCCTACAAGGTTTCCGGCGGTCTGCACGGTGTAGGTGTTTCGGTAGTGAACGCATTGTCCGAAGAGCTGGTC…
P. fluorescens	CINT-A	43.3055	1.52044	Grassland	Phyllosphere	CINT-A-P29-E09	CINTAP29E09	SAMN50083486	CINT-A-P29-E09	10500	12.8352	5940294	5940294	0		60	5424	5248	16	71	94.3945	/	/	/	/	TTGAGCGAAGAAAATACGTACGACTCAACGAGCATTAAAGTGCTGAAAGGCCTGGATGCCGTACGCAAACGTCCCGGTATGTACATTGGTGACACCGACGATGGCAGCGGTCTGCACCACATGGTGTTCGAGGTGGTCGACAACTCGATCGACGAAGCCCTCGCCGGCCATTGCGACGACATCAGCATCATCATCCACCCGGACGAATCCATTACCGTTAAAGACAACGGTCGTGGCATCCCGGTAGACGTGCATAAAGAGGAAGGCGTTTCCGCCGCCGAGGTCATCATGACCGTCCTCCACGCTGGCGGTAAGTTCGACGACAACTCCTACAAGGTATCCGGCGGTCTGCACGGTGTAGGTGTTTCGGTAGTGAACGCACTATCCGAAGAACTGGTC…
P. fluorescens	BAZI-A	43.4536	1.62067	Bareground	Phyllosphere	BAZI-A-P03-E05	BAZIAP03E05	SAMN50083466	BAZI-A-P03-E05	10892	41.5365	6049502	6049502	0		60	5505	5329	16	74	94.5517	/	/	/	/	TTGAGCGAAGAAAATACGTACGACTCAACGAGCATTAAAGTGCTGAAAGGCCTGGATGCCGTACGCAAACGTCCCGGTATGTACATTGGTGACACCGACGATGGCAGCGGTCTGCACCACATGGTGTTCGAGGTGGTCGACAACTCGATCGACGAAGCCCTCGCCGGCCATTGCGACGACATCAGCATCATCATCCACCCGGACGAATCCATTACCGTTAAAGACAACGGTCGTGGCATCCCGGTAGACGTGCATAAAGAGGAAGGCGTTTCCGCCGCCGAGGTCATCATGACCGTCCTCCACGCTGGCGGTAAGTTCGACGACAACTCCTACAAGGTATCCGGCGGTCTGCACGGTGTAGGTGTTTCGGTAGTGAACGCACTATCCGAAGAACTGGTC…
P. fluorescens	VILLA-A	43.4582	1.38095	Bareground	Phyllosphere	VILLA-A-P15-H03	VILLAAP15H03	SAMN50083530	VILLA-A-P15-H03	11839	42.4059	6105757	6105757	0		60	5557	5383	16	73	94.5626	/	/	/	/	TTGAGCGAAGAAAATACGTACGACTCAACGAGCATTAAAGTGCTGAAAGGCCTGGATGCCGTACGCAAACGTCCCGGTATGTACATTGGTGACACCGACGATGGCAGCGGTCTGCACCACATGGTGTTCGAGGTGGTCGACAACTCGATCGACGAAGCCCTCGCCGGCCATTGCGACGACATCAGCATCATCATCCACCCGGACGAATCCATTACCGTTAAAGACAACGGTCGTGGCATCCCGGTAGACGTGCATAAAGAGGAAGGCGTTTCCGCCGCCGAGGTCATCATGACCGTCCTCCACGCTGGCGGTAAGTTCGACGACAACTCCTACAAGGTATCCGGCGGTCTGCACGGTGTAGGTGTTTCGGTAGTGAACGCACTATCCGAAGAACTGGTC…
P. fluorescens	LABA-B	43.4509	1.40116	Bareground	Phyllosphere	LABA-B-P54-C12	LABABP54C12	SAMN50083497	LABA-B-P54-C12	11161	15.8462	6100667	6100667	0		60	5541	5365	16	70	94.4399	/	/	/	/	TTGAGCGAAGAAAATACGTACGACTCAACGAGCATTAAAGTGCTGAAAGGCCTGGATGCCGTACGCAAACGTCCCGGTATGTACATTGGTGACACCGACGATGGCAGCGGTCTGCACCACATGGTGTTCGAGGTGGTCGACAACTCGATCGACGAAGCCCTCGCCGGCCATTGCGACGACATCAGCATCATCATCCACCCGGACGAATCCATTACCGTTAAAGACAACGGTCGTGGCATCCCGGTAGACGTGCATAAAGAGGAAGGCGTTTCCGCCGCCGAGGTCATCATGACCGTCCTCCACGCTGGCGGTAAGTTCGACGACAACTCCTACAAGGTATCCGGCGGTCTGCACGGTGTAGGTGTTTCGGTAGTGAACGCACTATCCGAAGAACTGGTC…
P. fluorescens	CAPE-A	44.1085	1.99017	Meadow	Roots	CAPE-A-2-6R4	CAPEA26R4	SAMN50083472	CAPE-A-2-6R4	11718	23.2739	6143948	6143948	0		60	5594	5416	16	73	94.5378	/	/	/	/	TTGAGCGAAGAAAATACGTACGACTCAACGAGCATTAAAGTGCTGAAAGGCCTGGATGCCGTACGCAAACGTCCCGGTATGTACATTGGTGACACCGACGATGGCAGCGGTCTGCACCACATGGTGTTCGAGGTGGTCGACAACTCGATCGACGAAGCCCTCGCCGGCCATTGCGACGACATCAGCATCATCATCCACCCGGACGAATCCATTACCGTTAAAGACAACGGTCGTGGCATCCCGGTAGACGTGCATAAAGAGGAAGGCGTTTCCGCCGCCGAGGTCATCATGACCGTCCTCCACGCTGGCGGTAAGTTCGACGACAACTCCTACAAGGTATCCGGCGGTCTGCACGGTGTAGGTGTTTCGGTAGTGAACGCACTATCCGAAGAACTGGTC…
P. fluorescens	CAPE-A	44.1085	1.99017	Meadow	Roots	CAPE-A-2-5R1	CAPEA25R1	SAMN50083470	CAPE-A-2-5R1	10995	32.952	6143947	6143947	0		60	5594	5416	16	73	94.5377	/	/	/	/	TTGAGCGAAGAAAATACGTACGACTCAACGAGCATTAAAGTGCTGAAAGGCCTGGATGCCGTACGCAAACGTCCCGGTATGTACATTGGTGACACCGACGATGGCAGCGGTCTGCACCACATGGTGTTCGAGGTGGTCGACAACTCGATCGACGAAGCCCTCGCCGGCCATTGCGACGACATCAGCATCATCATCCACCCGGACGAATCCATTACCGTTAAAGACAACGGTCGTGGCATCCCGGTAGACGTGCATAAAGAGGAAGGCGTTTCCGCCGCCGAGGTCATCATGACCGTCCTCCACGCTGGCGGTAAGTTCGACGACAACTCCTACAAGGTATCCGGCGGTCTGCACGGTGTAGGTGTTTCGGTAGTGAACGCACTATCCGAAGAACTGGTC…
P. species	MONTI-B	43.3839	0.67257	Bareground	Phyllosphere	MONTI-B-P22-E10	MONTIBP22E10	SAMN50083515	MONTI-B-P22-E10	11342	23.4169	6064275	6064275	0		60	5546	5371	16	72	94.3686	/	/	/	/	TTGAGCGAAGAAAATACGTACGACTCAACGAGCATTAAAGTGCTGAAAGGCCTGGATGCCGTACGCAAACGTCCCGGTATGTACATTGGTGACACCGACGATGGCAGCGGTCTGCACCACATGGTGTTCGAGGTGGTCGACAACTCGATCGACGAAGCCCTCGCCGGCCATTGCGACGACATCAGCATCATCATCCACCCGGACGAATCCATCACCGTTAAAGACAACGGTCGTGGCATCCCGGTAGACGTGCATAAAGAGGAAGGCGTTTCCGCGGCCGAGGTCATCATGACCGTCCTCCACGCTGGCGGTAAGTTCGACGACAACTCCTACAAGGTATCCGGCGGTCTGCACGGCGTAGGTGTGTCGGTAGTGAACGCACTGTCCGAAGAGCTGGTC…
P. species	BACC-B	43.3122	1.51517	Grassland	Roots	BACC-B-6R-3	BACCB6R3	SAMN50083457	BACC-B-6R-3	11944	37.5209	5961148	5961148	0		60	5422	5248	16	72	94.3186	/	/	/	/	TTGAGCGAAGAAAATACGTACGACTCAACGAGCATTAAAGTGCTGAAAGGCCTGGATGCCGTACGCAAACGTCCCGGTATGTACATTGGTGACACCGACGATGGCAGCGGTCTGCACCACATGGTGTTCGAGGTGGTCGACAACTCGATCGACGAAGCCCTCGCCGGCCATTGCGACGACATCAGCATCATCATCCACCCGGACGAATCCATCACCGTTAAAGACAACGGTCGTGGCATCCCGGTAGACGTGCATAAAGAGGAAGGCGTTTCCGCGGCCGAGGTCATCATGACCGTCCTCCACGCTGGCGGTAAGTTCGACGACAACTCCTACAAGGTATCCGGCGGTCTGCACGGCGTAGGTGTGTCGGTAGTGAACGCACTGTCCGAAGAGCTGGTC…
P. species	SAUB-C	43.4756	1.36759	Meadow	Phyllosphere	SAUB-C-P17-B06	SAUBCP17B06	SAMN50083520	SAUB-C-P17-B06	10944	21.2068	6061583	6061583	0		60	5527	5357	16	71	94.3106	/	/	/	/	TTGAGCGAAGAAAATACGTACGACTCAACGAGCATTAAAGTGCTGAAAGGCCTGGATGCCGTACGCAAACGTCCCGGTATGTACATTGGTGACACCGACGATGGCAGCGGTCTGCACCACATGGTGTTCGAGGTGGTCGACAACTCGATCGACGAAGCCCTCGCCGGCCATTGCGACGACATCAGCATCATCATTCACCCGGACGAATCCATCACCGTTAAAGACAACGGTCGTGGCATCCCGGTAGACGTGCATAAAGAGGAAGGCGTTTCCGCCGCCGAGGTCATCATGACCGTCCTCCACGCTGGCGGTAAGTTCGACGACAACTCGTACAAGGTATCCGGCGGTCTGCACGGCGTAGGTGTGTCGGTAGTGAACGCACTGTCCGAAGAACTGGTC…
P. species	LOUB-B	43.5746	1.78572	Meadow	Phyllosphere	LOUB-B-P19-C08	LOUBBP19C08	SAMN50083506	LOUB-B-P19-C08	11505	31.6777	5906773	5906773	0		60	5465	5289	16	73	94.3084	/	/	/	/	TTGAGCGAAGAAAATACGTACGACTCAACGAGCATTAAAGTGCTGAAAGGCCTGGATGCCGTACGCAAACGTCCCGGTATGTACATTGGTGACACCGACGATGGCAGCGGTCTGCACCACATGGTGTTCGAGGTGGTCGACAACTCGATCGACGAAGCCCTCGCCGGCCATTGCGACGACATCAGCATCATCATTCACCCGGACGAATCCATCACCGTTAAAGACAACGGTCGTGGCATCCCGGTAGACGTGCATAAAGAGGAAGGCGTTTCCGCCGCCGAGGTCATCATGACCGTCCTCCACGCTGGCGGTAAGTTCGACGACAACTCGTACAAGGTATCCGGCGGTCTGCACGGCGTAGGTGTGTCGGTAGTGAACGCACTGTCCGAAGAACTGGTC…
P. moraviensis	VILLA-A	43.4582	1.38095	Bareground	Phyllosphere	VILLA-2-A5L-2	VILLA2A5L2	SAMN50083525	VILLA-2-A5L-2	10233	40.6166	5969129	5969129	0		60	5412	5238	16	71	92.7235	/	/	/	/	TTGAGCGAAGAAAATACGTACGACTCAACGAGCATTAAAGTGCTGAAAGGCCTGGATGCCGTACGCAAACGTCCCGGTATGTACATTGGTGACACCGACGATGGCAGCGGTCTGCACCACATGGTGTTCGAGGTGGTCGACAACTCGATCGACGAAGCCCTCGCCGGCCATTGCGACGACATCAGCATCATCATCCACCCGGACGAGTCCATCACCGTTAAAGACAACGGTCGTGGCATTCCGGTAGACGTGCATAAAGAGGAAGGCGTCTCCGCCGCCGAGGTCATCATGACCGTCCTCCACGCTGGCGGTAAGTTCGACGACAACTCCTATAAGGTATCCGGCGGTCTGCACGGTGTAGGTGTGTCGGTAGTGAACGCGCTGTCCGAAGAGCTGGTT…
P. moraviensis	BAZI-A	43.4536	1.62067	Bareground	Phyllosphere	BAZI-2-A5L-3	BAZI2A5L3	SAMN50083462	BAZI-2-A5L-3	10333	29.5615	5992142	5992142	0		60	5429	5253	16	71	92.766	/	/	/	/	TTGAGCGAAGAAAATACGTACGACTCAACGAGCATTAAAGTGCTGAAAGGCCTGGATGCCGTACGCAAACGTCCCGGTATGTACATTGGTGACACCGACGATGGCAGCGGTCTGCACCACATGGTGTTCGAGGTGGTCGACAACTCGATCGACGAAGCCCTCGCCGGCCATTGCGACGACATCAGCATCATCATCCACCCGGACGAGTCCATCACCGTTAAAGACAACGGTCGTGGCATTCCGGTAGACGTGCATAAAGAGGAAGGCGTGTCCGCCGCCGAGGTCATCATGACCGTCCTCCACGCTGGCGGTAAGTTCGACGACAACTCCTATAAAGTATCCGGCGGTCTGCACGGTGTAGGTGTGTCGGTAGTGAACGCGCTGTCCGAAGAGCTGGTT…
P. sp900187515	LANT-D	43.5648	1.65201	Bareground	Roots	LANT-D-2-5R1	LANTD25R1	SAMN50083500	LANT-D-2-5R1	11384	25.8548	6509279	6509279	0		59	5956	5743	19	71	88.5272	/	/	/	/	TTGAGCGAAGAAAATACGTACGACTCAACGAGCATTAAAGTGCTGAAAGGCCTGGATGCCGTACGCAAACGTCCCGGTATGTACATTGGTGACACCGACGATGGCAGCGGTCTGCACCACATGGTGTTCGAGGTGGTCGACAACTCGATCGACGAAGCCCTCGCCGGCCACTGCGACGACATCAGCATCATCATCCACCCGGACGAATCCATCACCGTTAAAGACAACGGTCGTGGCATCCCGGTAGACGTGCACAAAGAGGAAGGCGTTTCCGCCGCCGAGGTCATCATGACCGTCCTCCACGCTGGTGGTAAGTTCGACGACAACTCCTACAAAGTATCCGGCGGTCTGCACGGTGTAGGTGTGTCGGTAGTGAACGCACTGTCCGAAGAACTGGTT…
P. helmanticensis	LESP-A	43.0942	1.71998	Bareground	Phyllosphere	LESP-A-2-5L	LESPA25L	SAMN50083503	LESP-A-2-5L	11670	31.3727	6815399	6815399	0		59	6173	5968	19	76	88.5101	/	/	/	/	TTGAGCGAAGAAAATACGTACGACTCAACGAGCATTAAAGTGCTGAAAGGCCTGGATGCCGTACGCAAACGTCCCGGTATGTACATTGGTGACACCGACGATGGCAGCGGTCTGCACCACATGGTGTTCGAGGTGGTCGACAACTCGATCGACGAAGCCCTCGCCGGCCACTGCGACGACATCAGCATCATCATCCACCCGGACGAATCCATCACCGTTAAAGACAACGGTCGTGGCATCCCGGTAGACGTGCACAAAGAGGAAGGCGTTTCCGCCGCCGAGGTCATCATGACCGTCCTCCACGCTGGTGGTAAGTTCGACGACAACTCCTACAAAGTATCCGGCGGTCTGCACGGTGTAGGTGTGTCGGTAGTGAACGCACTGTCCGAAGAACTGGTA…
P. species	AMBR-A	43.7332	1.82387	Bareground	Roots	AMBR-2_A6R-3	/	/	AMBR-2_A6R-3	/	/	/	/	/	/	/	/	/	/	/	/	/	/	/	/	/

## Sheet: S2
Supplementary Data 2. Summary of the 10,070 Hierarchical Orthologous Groups (HOGs) identified among 74 P. siliginis strains. 'Min_iteration' and 'Max_iteration' correspond to the minimal and maximal number of genes within a given HOG across the 74 strains.
Orthogroups	HOGs	Number_of_strains_with_the_HOG	Min_iteration	Max_iteration	OTU6_Psi_7	OTU6_Psi_8	OTU6_Psi_9	OTU6_Psi_10	OTU6_Psi_11	OTU6_Psi_12	OTU6_Psi_13	OTU6_Psi_14	OTU6_Psi_15	OTU6_Psi_16	OTU6_Psi_17	OTU6_Psi_18	OTU6_Psi_19	OTU6_Psi_20	OTU6_Psi_21	OTU6_Psi_22	OTU6_Psi_2	OTU6_Psi_5	OTU6_Psi_23	OTU6_Psi_24	OTU6_Psi_25	OTU6_Psi_26	OTU6_Psi_27	OTU6_Psi_28	OTU6_Psi_29	OTU6_Psi_30	OTU6_Psi_31	OTU6_Psi_32	OTU6_Psi_33	OTU6_Psi_34	OTU6_Psi_35	OTU6_Psi_36	OTU6_Psi_37	OTU6_Psi_38	OTU6_Psi_39	OTU6_Psi_40	OTU6_Psi_41	OTU6_Psi_42	OTU6_Psi_43	OTU6_Psi_44	OTU6_Psi_45	OTU6_Psi_46	OTU6_Psi_1	OTU6_Psi_47	OTU6_Psi_48
OG0000000	HOG0000000	45	1	5	0	5	0	2	2	4	2	0	2	0	0	0	0	2	0	5	5	2	0	2	5	5	1	3	0	0	2	0	5	5	2	0	2	5	2	2	0	2	5	0	3	0	0	2	5
OG0000000	HOG0000001	57	2	5	5	0	4	3	3	0	3	5	3	5	5	5	5	3	5	0	0	3	5	3	0	0	4	2	5	4	3	5	0	0	3	5	3	0	3	3	5	3	0	5	2	5	5	3	0
OG0000001	HOG0000002	64	1	4	2	2	1	1	0	0	4	0	1	1	1	3	2	2	1	1	1	1	2	1	3	4	1	1	4	1	1	2	1	1	1	1	1	0	2	0	3	2	1	1	1	1	1	2	3
OG0000001	HOG0000003	2	1	1	0	0	0	0	0	0	0	1	0	0	0	0	0	0	0	0	0	0	0	0	0	0	0	0	0	0	0	0	0	0	0	0	0	0	0	0	0	0	0	0	0	0	0	0	0
OG0000001	HOG0000004	4	1	1	0	0	0	1	0	0	0	0	0	0	0	0	0	0	0	0	0	1	0	0	0	0	0	0	1	0	0	0	0	0	0	0	0	0	0	0	0	0	0	0	0	0	0	0	0
OG0000001	HOG0000005	8	1	1	0	1	0	0	0	0	0	0	0	0	1	0	1	0	0	0	0	0	0	0	0	0	0	0	0	0	1	0	0	0	0	0	1	0	0	0	0	0	0	0	0	0	0	0	1
OG0000001	HOG0000006	3	1	1	0	0	0	0	0	0	0	0	0	0	0	0	0	0	1	0	0	0	0	0	0	0	0	0	0	0	1	0	0	0	0	0	0	0	0	1	0	0	0	0	0	0	0	0	0
OG0000001	HOG0000007	52	1	2	0	0	2	0	2	2	0	0	1	2	1	1	1	0	1	2	0	0	2	1	1	0	1	1	0	2	1	2	2	1	1	1	0	2	0	0	0	1	1	1	1	2	1	0	1
OG0000001	HOG0000008	9	1	2	0	0	0	0	0	0	0	0	0	2	0	0	0	0	1	0	0	0	0	0	0	0	0	0	0	0	1	0	0	0	0	0	0	1	0	0	0	0	0	0	1	0	0	0	0
OG0000001	HOG0000009	22	1	2	0	0	0	0	1	1	0	0	0	1	0	0	0	0	0	0	1	0	0	0	0	0	0	1	0	0	0	0	0	1	0	1	0	2	0	0	0	1	1	0	0	0	0	0	0
OG0000002	HOG0000010	9	1	1	0	0	0	1	0	0	0	0	0	0	0	0	0	0	0	0	1	1	0	0	0	0	0	0	0	0	0	0	0	0	0	0	0	0	0	0	0	0	0	1	0	0	1	0	0
OG0000002	HOG0000011	15	1	1	0	0	0	0	0	0	0	0	1	1	0	1	1	0	0	1	0	0	0	0	0	0	0	0	0	0	0	0	1	0	0	1	0	0	0	0	0	0	1	0	0	0	0	0	0
OG0000002	HOG0000012	50	1	1	0	0	1	1	1	1	0	0	1	1	0	0	1	1	1	1	1	1	1	1	0	0	1	1	0	1	1	0	1	0	0	1	1	1	1	0	0	1	1	1	1	0	1	0	0
OG0000002	HOG0000013	28	1	2	0	0	1	1	1	1	0	0	0	0	0	0	0	0	1	1	0	1	1	1	0	0	1	0	0	1	1	0	1	0	0	0	0	0	0	0	0	0	0	1	1	0	1	0	0
OG0000002	HOG0000014	3	1	1	0	1	0	0	0	0	0	1	0	0	0	0	0	0	0	0	0	0	0	0	0	0	0	0	0	0	0	0	0	0	0	0	0	0	0	0	0	0	0	0	0	1	0	0	0
OG0000002	HOG0000015	20	1	1	0	0	1	0	1	1	0	0	0	1	1	0	0	0	0	0	0	0	0	0	0	0	0	0	0	1	0	0	0	1	0	1	0	0	1	0	0	0	1	0	0	0	0	0	0
OG0000002	HOG0000016	11	1	1	0	0	0	0	1	0	0	0	0	0	0	0	0	0	0	0	1	0	1	0	0	0	0	0	0	0	1	0	0	1	0	0	0	0	1	0	0	1	0	0	0	0	0	0	0
OG0000002	HOG0000017	22	1	1	0	0	0	0	0	0	0	0	1	0	1	1	1	1	0	1	0	0	1	1	0	0	1	0	0	0	0	0	1	0	0	0	1	1	0	0	0	0	0	0	1	0	0	0	0
OG0000002	HOG0000018	18	1	2	0	0	0	0	0	0	0	1	0	0	0	0	0	0	0	0	0	0	0	0	0	0	0	1	0	0	1	0	0	0	0	0	1	0	0	0	0	0	0	1	0	1	1	0	0
OG0000002	HOG0000019	28	1	1	0	1	1	1	0	1	0	0	1	0	0	0	0	1	1	1	1	1	0	1	0	0	1	0	0	1	1	0	1	0	0	0	0	1	0	0	0	1	0	0	1	0	0	0	0
OG0000003	HOG0000020	51	1	12	3	1	0	0	0	1	4	1	4	1	3	3	7	2	2	0	1	0	2	5	4	4	6	5	2	0	0	4	0	2	1	7	2	2	0	4	0	4	12	0	2	1	0	3	3
OG0000004	HOG0000021	8	1	1	0	0	0	0	0	0	0	0	1	1	0	0	0	1	0	0	0	0	0	0	0	0	0	0	0	0	0	0	0	0	0	0	0	1	0	0	0	0	0	0	0	0	0	0	0
OG0000004	HOG0000022	25	1	2	0	0	0	1	0	0	1	1	0	0	1	0	0	0	0	0	1	1	0	1	1	1	1	0	0	0	1	0	0	0	0	1	1	0	0	0	0	0	1	1	0	0	1	0	0
OG0000004	HOG0000023	55	1	1	1	0	1	1	1	1	1	1	0	0	1	1	1	0	1	1	1	1	1	0	1	1	0	1	1	1	1	1	1	1	0	0	1	0	0	1	0	1	0	1	1	0	1	1	1
OG0000004	HOG0000024	44	1	4	1	0	1	2	1	1	2	2	0	0	3	0	0	0	1	1	3	1	1	1	2	2	1	1	0	1	1	0	1	3	0	1	1	0	0	0	0	0	1	2	1	0	2	1	0
OG0000005	HOG0000025	74	2	4	2	2	3	2	2	2	2	2	2	2	2	2	2	2	2	2	2	2	2	2	2	2	3	2	2	2	2	2	2	2	2	2	2	2	2	2	2	2	2	2	2	2	2	2	2
OG0000006	HOG0000026	74	1	1	1	1	1	1	1	1	1	1	1	1	1	1	1	1	1	1	1	1	1	1	1	1	1	1	1	1	1	1	1	1	1	1	1	1	1	1	1	1	1	1	1	1	1	1	1
OG0000006	HOG0000027	74	1	1	1	1	1	1	1	1	1	1	1	1	1	1	1	1	1	1	1	1	1	1	1	1	1	1	1	1	1	1	1	1	1	1	1	1	1	1	1	1	1	1	1	1	1	1	1
OG0000007	HOG0000028	74	1	1	1	1	1	1	1	1	1	1	1	1	1	1	1	1	1	1	1	1	1	1	1	1	1	1	1	1	1	1	1	1	1	1	1	1	1	1	1	1	1	1	1	1	1	1	1
OG0000007	HOG0000029	74	1	1	1	1	1	1	1	1	1	1	1	1	1	1	1	1	1	1	1	1	1	1	1	1	1	1	1	1	1	1	1	1	1	1	1	1	1	1	1	1	1	1	1	1	1	1	1
OG0000008	HOG0000030	74	1	2	2	2	2	2	2	2	2	2	1	2	2	2	2	2	2	2	2	2	2	2	2	2	2	2	2	2	2	2	2	2	2	2	2	2	2	2	2	2	2	2	2	2	2	2	2
OG0000009	HOG0000031	72	1	2	1	2	1	1	1	1	1	1	1	2	1	2	1	2	1	1	1	1	0	2	1	1	2	1	1	1	1	1	1	1	2	2	1	2	0	1	2	1	2	1	1	2	1	1	1
OG0000009	HOG0000032	52	1	1	1	0	1	1	1	1	1	1	0	0	1	0	1	0	1	1	1	1	0	0	1	1	0	1	1	1	1	1	1	1	0	0	1	0	0	1	0	1	0	1	1	0	1	1	1
OG0000010	HOG0000033	73	1	3	3	2	1	2	2	1	1	3	3	3	0	2	3	2	3	1	2	2	2	2	1	1	2	2	3	1	1	1	1	2	1	2	2	3	2	2	2	2	2	2	3	2	2	3	3
OG0000011	HOG0000034	68	1	8	2	4	1	3	4	1	2	2	1	1	0	3	1	1	4	2	1	3	2	2	2	2	2	2	1	1	1	2	2	0	2	4	3	1	0	2	5	1	2	1	2	0	1	2	2
OG0000012	HOG0000035	70	1	5	4	2	1	1	1	1	4	2	1	2	2	2	1	0	4	2	1	1	1	3	2	4	3	1	5	2	1	3	2	4	5	1	1	4	1	1	2	1	1	1	1	1	1	4	1
OG0000013	HOG0000036	51	1	2	1	1	0	1	0	0	1	1	0	1	1	1	1	0	1	1	1	1	2	1	1	1	1	0	0	0	1	1	1	1	0	1	1	0	1	1	0	0	1	1	1	0	1	1	0
OG0000013	HOG0000037	59	1	3	2	1	1	1	1	1	2	2	0	0	2	1	1	0	2	1	0	1	2	1	2	2	1	1	1	1	1	1	1	2	1	1	1	0	1	3	0	1	1	0	1	2	0	2	1
OG0000014	HOG0000038	69	1	4	3	1	3	1	4	2	0	0	2	2	1	2	3	2	1	1	2	1	3	2	0	0	2	2	2	3	1	2	1	1	4	1	1	2	3	1	2	3	1	1	1	2	1	3	2
OG0000015	HOG0000039	60	1	1	1	1	1	1	1	1	1	1	0	0	1	1	1	0	0	1	0	1	1	1	1	1	1	1	1	1	1	1	1	1	1	1	1	0	1	1	1	1	1	0	1	1	0	1	1
OG0000015	HOG0000040	73	1	1	1	1	1	1	1	1	1	1	1	1	1	1	1	1	1	1	1	1	1	1	1	1	1	1	1	1	1	1	1	1	1	1	1	1	1	1	1	1	1	1	1	1	1	1	1
OG0000016	HOG0000041	59	1	3	1	0	2	0	2	1	1	1	1	1	1	0	1	1	1	2	0	1	2	1	1	1	1	1	1	2	1	1	2	1	0	1	1	0	2	0	0	0	0	2	1	0	2	1	1
OG0000016	HOG0000042	56	1	1	1	0	0	1	0	1	0	0	0	1	1	1	1	1	1	1	1	1	1	1	0	0	1	1	1	0	1	1	1	1	1	1	1	0	0	0	1	1	0	1	1	1	1	1	1
OG0000017	HOG0000043	45	1	2	0	1	1	1	0	0	1	1	1	1	2	1	1	0	0	1	1	0	1	1	1	1	1	1	1	1	1	0	1	0	0	0	1	1	0	0	0	1	0	1	0	0	1	0	1
OG0000017	HOG0000044	7	1	1	0	0	0	0	0	0	0	0	0	0	0	0	0	0	0	0	0	0	0	1	0	0	1	0	0	0	0	0	0	0	0	0	0	0	0	0	0	1	0	0	0	0	0	0	0
OG0000017	HOG0000045	32	1	2	1	1	0	1	1	0	1	0	0	0	0	0	0	1	1	0	0	1	0	0	1	1	0	1	1	0	0	1	0	0	2	1	0	0	0	2	1	0	1	0	1	1	0	1	0
OG0000017	HOG0000046	2	1	1	0	0	0	0	0	0	0	0	0	0	0	0	0	0	0	0	0	0	0	0	0	0	0	0	0	0	0	0	0	0	0	0	0	0	0	0	0	0	0	0	0	0	0	0	0
OG0000017	HOG0000047	33	1	1	1	0	1	0	0	1	0	1	1	1	1	1	1	0	0	1	1	1	1	0	0	0	0	0	0	1	1	1	1	1	1	0	1	0	0	0	0	0	0	1	0	0	1	1	1
OG0000017	HOG0000048	3	1	1	0	0	0	0	0	0	0	0	0	0	0	0	0	0	0	0	0	0	0	0	0	0	0	0	0	0	1	0	0	0	0	0	0	0	0	0	0	0	0	0	0	0	0	0	0
OG0000018	HOG0000049	74	1	3	2	2	2	1	1	3	1	2	2	1	2	2	1	3	1	1	1	1	2	2	1	1	2	2	1	2	1	2	1	2	1	2	1	2	3	2	1	2	2	1	1	2	1	2	2
OG0000019	HOG0000050	74	1	3	1	1	2	1	3	3	1	1	2	1	1	1	2	2	1	2	1	1	2	1	1	1	1	2	3	3	1	1	2	2	2	1	1	2	2	1	1	2	1	2	1	1	2	1	1
OG0000020	HOG0000051	73	1	3	2	1	1	1	1	2	1	1	3	3	1	1	1	2	2	1	3	2	2	2	1	1	2	2	1	1	0	2	1	2	2	2	1	2	1	1	1	2	2	2	1	3	2	2	2
OG0000021	HOG0000052	74	1	2	1	2	2	1	2	2	1	2	2	2	2	2	1	2	1	2	1	1	2	2	1	1	2	1	1	2	1	1	2	2	2	1	1	2	2	1	2	1	2	2	1	1	2	1	1
OG0000022	HOG0000053	74	1	3	2	2	1	1	1	1	2	3	1	2	1	2	2	1	1	1	1	1	1	2	2	2	2	2	2	1	1	1	1	1	2	2	1	2	3	2	2	1	2	1	1	2	1	2	2
OG0000023	HOG0000054	73	1	2	1	1	1	1	1	1	1	1	1	1	1	1	1	1	1	2	1	1	1	1	1	1	1	1	1	1	1	2	1	1	1	1	1	1	0	1	1	1	1	1	1	1	1	1	1
OG0000023	HOG0000055	35	1	1	0	0	0	1	0	0	1	1	1	1	1	0	0	1	0	0	1	1	0	1	1	1	1	0	0	0	1	0	0	1	0	1	1	1	0	0	0	0	1	1	0	0	1	0	0
OG0000024	HOG0000056	48	1	2	0	0	1	1	1	1	0	0	1	1	0	0	1	1	1	1	1	1	1	1	0	0	1	1	0	1	1	0	1	0	0	1	1	1	1	0	0	1	1	1	1	0	1	0	0
OG0000024	HOG0000057	58	1	2	0	1	1	1	1	2	0	1	1	2	1	1	1	1	1	1	2	1	1	1	0	0	1	1	0	1	1	0	1	1	0	1	1	1	1	0	0	1	1	1	1	1	1	0	0
OG0000025	HOG0000058	74	1	3	1	1	2	1	2	2	1	1	2	1	1	1	2	1	1	2	1	1	2	1	1	1	1	2	3	3	1	1	2	2	2	1	1	1	2	1	1	2	1	2	1	1	2	1	1
OG0000026	HOG0000059	74	1	3	2	1	1	1	1	1	2	2	1	2	1	2	2	1	1	1	1	1	1	2	2	2	2	2	2	1	1	1	1	1	2	2	1	2	2	2	1	1	2	1	1	2	1	2	2
OG0000027	HOG0000060	73	1	3	2	1	1	1	1	1	2	2	1	1	1	2	2	1	2	1	2	1	1	1	2	2	1	2	3	1	1	2	1	1	2	1	1	1	0	1	3	2	1	1	2	1	1	2	2
OG0000028	HOG0000061	65	1	4	1	1	2	1	2	2	1	1	2	2	4	1	3	2	2	1	0	1	2	2	1	1	2	1	3	2	1	4	1	2	2	0	2	2	1	1	2	3	0	0	1	1	0	1	2
OG0000029	HOG0000062	2	2	2	0	0	0	0	0	0	0	0	0	0	0	0	0	0	0	0	0	0	0	0	0	0	0	0	0	0	0	0	0	0	0	0	0	0	0	0	0	0	0	2	0	0	2	0	0
OG0000029	HOG0000063	17	1	4	1	0	0	0	1	0	0	4	0	0	0	1	0	4	0	0	1	0	0	0	0	0	0	0	0	0	4	4	0	0	0	0	0	0	0	0	2	0	0	0	1	0	0	2	0
OG0000029	HOG0000064	19	1	8	0	0	0	8	4	0	0	0	0	0	0	0	0	0	5	0	0	4	3	2	0	0	2	0	0	0	2	0	0	0	0	0	2	0	0	0	0	0	0	0	5	0	0	0	0
OG0000030	HOG0000065	49	1	5	1	2	0	1	0	0	3	2	0	0	1	3	2	0	0	0	3	1	0	2	3	3	2	2	4	0	1	5	0	0	2	1	1	1	0	3	3	2	2	1	0	2	1	1	5
OG0000031	HOG0000066	74	1	4	1	4	2	1	1	1	1	1	1	1	1	1	1	1	1	2	1	1	2	1	1	1	1	1	1	1	1	2	1	1	2	2	1	1	1	2	1	1	2	2	2	1	2	1	1
OG0000032	HOG0000067	27	1	10	0	10	0	0	1	0	0	0	0	0	0	2	0	0	0	0	0	0	4	0	0	0	0	3	2	0	0	4	0	0	2	0	0	0	0	0	1	5	1	3	0	0	4	0	7
OG0000033	HOG0000068	72	1	2	2	1	2	2	2	1	1	1	2	2	1	1	2	2	1	2	2	2	2	1	1	1	1	2	1	2	1	1	2	1	1	2	1	2	0	1	1	1	2	2	1	0	2	2	1
OG0000034	HOG0000069	40	1	2	1	0	2	1	1	1	1	1	0	0	0	2	2	0	0	1	0	1	0	1	1	1	1	1	2	2	1	1	0	0	0	1	1	0	1	0	0	1	1	0	1	2	0	1	2
OG0000034	HOG0000070	51	1	2	0	1	0	0	0	1	1	2	0	1	1	0	0	1	1	1	1	1	2	0	1	1	1	1	1	1	1	1	1	1	1	0	1	0	1	1	0	0	0	1	1	1	2	0	0
OG0000035	HOG0000071	71	1	2	1	1	1	1	1	2	1	1	2	2	1	1	1	2	2	1	2	0	1	2	1	1	2	2	1	1	0	1	1	2	2	2	1	2	1	1	1	2	2	1	1	2	1	1	1
OG0000036	HOG0000072	59	1	1	0	1	1	1	1	1	0	0	1	1	1	0	1	1	1	1	1	1	1	1	0	0	1	1	0	1	1	0	1	1	0	1	1	1	1	1	0	1	1	1	1	0	1	0	1
OG0000036	HOG0000073	32	1	2	0	0	1	0	0	0	1	0	0	0	0	1	0	1	0	0	0	1	2	1	1	1	0	0	1	1	1	1	0	1	1	0	0	2	0	1	1	1	1	0	0	1	0	0	0
OG0000036	HOG0000074	2	1	1	1	0	0	0	0	0	0	0	0	0	0	0	0	0	0	0	0	0	0	0	0	0	0	0	0	0	0	0	0	0	0	0	0	0	0	0	0	0	0	0	0	0	0	1	0
OG0000037	HOG0000075	20	1	1	0	0	0	1	0	0	0	0	0	0	0	0	0	0	1	0	1	1	0	0	0	0	0	0	0	0	1	0	0	1	0	0	1	0	1	0	0	0	0	1	1	1	1	0	0
OG0000037	HOG0000076	61	1	3	1	2	1	1	1	1	1	2	1	1	2	1	2	2	0	1	0	1	1	0	2	1	0	1	1	1	1	2	1	1	1	1	0	1	1	2	1	1	1	0	1	0	0	1	1
OG0000037	HOG0000077	2	1	1	0	0	0	0	0	0	0	0	0	0	0	0	0	0	0	0	0	0	0	1	0	0	1	0	0	0	0	0	0	0	0	0	0	0	0	0	0	0	0	0	0	0	0	0	0
OG0000038	HOG0000078	56	1	3	2	2	1	0	1	2	2	1	2	1	1	1	1	2	0	2	0	2	1	1	2	2	1	2	3	3	1	2	0	2	2	1	0	1	1	2	2	0	0	2	1	2	1	2	1
OG0000039	HOG0000079	3	1	1	0	0	0	0	0	0	0	0	0	0	0	0	0	1	0	0	0	0	0	0	0	0	0	0	0	0	1	0	0	0	0	0	0	0	0	0	0	0	0	0	0	0	0	0	0
OG0000039	HOG0000080	53	1	4	2	1	3	1	0	2	1	1	1	1	0	2	1	1	3	1	0	1	1	0	1	1	0	2	1	3	1	1	1	1	1	0	4	0	1	0	1	0	0	0	1	0	0	2	2
OG0000040	HOG0000081	70	1	2	1	1	2	2	1	1	1	1	1	1	1	1	1	1	1	1	2	2	1	1	1	1	1	2	1	2	1	1	1	0	0	1	1	0	1	0	1	1	1	2	1	1	2	1	1
OG0000041	HOG0000082	74	1	3	1	1	1	1	1	1	1	2	2	2	1	1	1	2	1	1	1	1	1	1	1	1	1	1	1	1	1	1	1	1	1	1	1	2	1	1	1	3	1	1	1	1	1	1	1
OG0000042	HOG0000083	73	1	2	1	1	1	1	1	1	1	2	1	1	2	1	1	1	2	1	1	1	1	1	1	1	1	1	1	1	1	1	1	2	1	1	1	1	1	1	1	2	1	1	2	1	1	1	1
OG0000043	HOG0000084	74	1	2	1	1	1	1	1	1	1	2	2	2	1	1	1	2	1	1	1	1	1	1	1	1	1	1	1	1	1	1	1	1	1	1	1	2	1	1	1	2	1	1	1	1	1	1	1
OG0000044	HOG0000085	74	1	2	1	1	1	1	1	1	1	2	2	2	1	1	1	2	1	1	1	1	1	1	1	1	1	1	1	1	1	1	1	1	1	1	1	2	1	1	1	2	1	1	1	1	1	1	1
OG0000045	HOG0000086	70	1	2	1	1	1	1	1	0	1	2	1	1	1	0	1	1	1	1	2	1	1	2	1	1	2	2	1	1	1	1	1	0	1	2	1	1	0	1	1	1	2	1	1	1	1	1	1
OG0000046	HOG0000087	44	1	1	0	0	1	1	0	0	1	1	0	0	1	1	1	0	1	0	0	1	0	0	1	1	0	1	1	1	1	1	0	0	1	0	1	1	0	0	1	1	0	0	1	1	0	0	1
OG0000046	HOG0000088	32	1	3	1	0	0	0	0	1	0	0	0	0	0	1	0	1	1	1	0	1	1	0	0	0	2	1	1	1	1	1	0	1	2	0	0	0	2	0	0	0	0	0	2	2	1	3	0
OG0000047	HOG0000089	32	1	3	1	0	0	0	0	1	0	0	0	0	0	1	0	1	1	1	0	1	1	0	0	0	2	1	1	1	1	1	0	1	2	0	0	0	2	0	0	0	0	0	2	2	1	3	0
OG0000047	HOG0000090	44	1	1	0	0	1	1	0	0	1	1	0	0	1	1	1	0	1	0	0	1	0	0	1	1	0	1	1	1	1	1	0	0	1	0	1	1	0	0	1	1	0	0	1	1	0	0	1
OG0000048	HOG0000091	74	1	6	1	1	1	1	2	1	1	2	1	1	1	1	1	1	1	1	1	1	1	1	1	1	1	1	1	1	1	1	1	1	1	1	1	3	6	1	1	1	1	1	1	1	1	1	1
OG0000049	HOG0000092	74	1	2	1	1	1	1	1	1	1	1	2	2	2	1	1	1	1	1	1	1	1	1	1	1	1	1	1	1	1	1	1	2	1	1	1	2	1	1	1	1	1	1	1	1	1	1	1
OG0000050	HOG0000093	74	1	4	1	1	1	1	1	1	1	1	1	1	1	1	1	1	1	1	1	1	1	1	1	1	1	1	1	1	1	1	1	1	1	1	1	1	1	1	1	1	1	1	1	1	1	4	1
OG0000051	HOG0000094	74	1	2	1	1	1	1	1	1	1	1	2	2	1	1	1	2	1	1	1	1	1	1	1	1	1	1	1	1	1	1	1	1	1	1	1	2	1	1	1	1	1	1	1	1	1	1	1
OG0000052	HOG0000095	74	1	2	1	1	1	1	1	1	2	1	2	1	1	1	1	1	1	1	1	2	1	1	1	2	1	1	1	1	1	1	1	1	1	1	1	1	1	2	1	2	1	1	1	1	1	1	1
OG0000053	HOG0000096	38	1	3	0	0	2	0	0	1	0	0	1	1	0	0	0	1	0	3	0	1	0	1	0	1	2	0	0	1	1	0	2	0	1	0	0	3	1	0	1	0	1	1	1	1	0	0	1
OG0000053	HOG0000097	35	1	1	0	1	0	1	0	1	0	1	0	1	1	0	1	1	0	1	0	0	1	0	1	0	0	0	0	0	1	1	1	0	0	1	0	0	0	0	0	0	1	0	1	0	0	0	0
OG0000054	HOG0000098	41	1	1	0	0	1	1	0	0	1	1	0	0	0	1	1	0	1	0	0	1	0	0	1	1	0	1	1	1	1	1	0	0	1	0	1	1	0	0	1	1	0	0	1	1	0	0	1
OG0000054	HOG0000099	33	1	2	0	0	0	0	0	1	0	2	0	1	0	1	0	1	0	1	1	1	0	0	0	0	1	1	1	1	1	1	0	1	1	0	0	0	2	0	0	0	0	1	2	1	1	2	0
OG0000055	HOG0000100	55	1	3	1	1	1	0	1	1	1	2	2	0	3	0	1	0	1	1	0	0	1	2	1	1	2	3	2	1	1	3	1	1	1	0	0	0	0	1	1	2	1	0	0	2	1	1	3
OG0000056	HOG0000101	27	1	10	2	0	0	0	3	0	0	2	0	0	5	0	0	0	0	3	6	0	0	0	0	0	0	1	3	0	0	0	2	3	4	0	1	7	0	5	0	3	0	1	0	0	1	2	2
OG0000057	HOG0000102	74	1	2	1	1	1	1	1	1	1	1	1	1	1	1	1	1	1	1	2	1	1	1	1	1	1	1	2	1	1	1	1	1	1	1	1	1	1	1	1	1	1	2	1	2	2	1	1
OG0000058	HOG0000103	56	1	2	2	1	2	0	2	1	1	1	0	0	0	1	1	0	0	1	1	0	2	2	1	1	2	2	2	2	1	1	1	0	1	2	2	0	0	1	1	1	2	0	2	1	0	2	2
OG0000059	HOG0000104	72	1	3	1	1	1	1	1	1	1	1	1	1	1	1	1	1	1	1	1	2	1	1	2	1	1	1	0	1	1	1	1	1	1	1	1	1	0	1	1	1	1	1	1	1	1	1	1
OG0000060	HOG0000105	57	1	3	0	2	1	1	1	1	1	1	0	1	2	2	0	0	1	1	2	1	1	1	2	1	1	1	1	1	0	2	1	2	2	1	2	0	1	2	2	1	1	2	2	1	2	0	1
OG0000061	HOG0000106	74	1	3	1	1	1	1	1	1	1	1	1	2	1	1	1	1	1	1	1	1	3	1	1	1	1	1	1	1	1	1	1	1	1	1	1	1	1	1	1	1	1	1	1	1	1	1	1
OG0000062	HOG0000107	74	1	3	1	2	1	1	1	1	1	1	1	1	1	1	1	1	1	1	1	1	1	1	1	1	1	1	1	1	1	1	1	1	1	1	1	1	1	1	1	1	1	1	1	1	1	1	1
OG0000063	HOG0000108	74	1	2	1	1	1	1	1	1	1	1	1	1	1	1	1	1	1	1	1	1	1	1	1	1	1	1	1	1	1	1	1	1	1	1	2	1	1	1	1	1	1	1	1	1	1	1	1
OG0000064	HOG0000109	74	1	2	1	1	1	1	1	1	1	1	1	1	1	1	1	1	1	2	1	1	1	1	1	1	1	1	1	1	1	2	1	1	1	1	1	1	1	1	1	1	1	1	1	1	1	1	1
OG0000065	HOG0000110	74	1	3	1	1	1	1	1	1	1	1	1	1	2	1	1	3	1	1	1	1	1	1	1	1	1	1	1	1	1	1	1	1	1	1	1	1	1	1	1	1	1	1	1	1	1	1	1
OG0000066	HOG0000111	74	1	2	1	1	1	1	1	1	1	1	1	1	1	1	1	2	1	1	1	1	1	1	1	1	1	1	1	1	1	1	1	1	1	1	1	1	1	2	1	1	1	1	1	1	1	1	1
OG0000067	HOG0000112	69	1	2	1	1	1	1	1	1	1	1	1	1	1	1	1	1	2	1	1	1	2	1	1	1	1	1	1	1	1	1	1	1	2	1	0	0	0	1	1	1	1	1	1	2	1	1	1
OG0000068	HOG0000113	74	1	3	1	1	1	1	1	1	1	1	1	1	1	1	1	1	1	1	1	1	1	1	1	1	1	1	1	1	1	2	1	1	1	1	1	1	3	1	1	1	1	1	1	1	1	1	1
OG0000069	HOG0000114	74	1	4	1	4	1	1	1	1	1	1	1	1	1	1	1	1	1	1	1	1	1	1	1	1	1	1	1	1	1	1	1	1	1	1	1	1	1	1	1	1	1	1	1	1	1	1	1
OG0000070	HOG0000115	73	1	2	1	1	1	1	1	1	1	1	1	2	1	1	1	1	1	1	1	1	1	1	1	1	1	1	1	2	1	2	1	1	1	1	1	1	0	1	1	1	1	1	1	1	1	1	1
OG0000071	HOG0000116	73	1	2	1	1	1	1	1	1	1	1	1	1	1	2	1	1	1	1	1	1	1	1	1	1	1	1	1	1	1	1	1	1	1	1	1	1	0	1	1	1	1	1	1	1	1	1	1
OG0000072	HOG0000117	74	1	2	1	1	1	1	2	1	1	1	1	1	1	1	1	1	1	1	1	1	1	2	1	1	1	1	1	1	1	1	1	1	1	1	1	2	1	1	1	1	1	1	1	1	1	1	1
OG0000073	HOG0000118	74	1	2	1	2	1	1	1	1	1	1	1	1	1	1	1	1	1	1	1	1	1	1	1	1	1	1	1	1	1	1	1	1	1	1	1	1	2	1	1	1	1	1	1	1	1	1	1
OG0000074	HOG0000119	74	1	2	1	1	1	1	1	1	1	1	1	1	1	1	1	1	1	1	1	1	1	1	1	1	1	1	1	1	1	1	1	1	1	1	1	1	1	1	1	1	1	1	1	1	1	1	1
OG0000075	HOG0000120	74	1	2	1	1	1	1	1	1	1	1	1	1	1	1	1	1	1	1	1	1	1	1	1	1	1	1	1	2	1	1	1	1	1	1	1	1	1	1	1	1	1	1	2	1	1	1	1
OG0000076	HOG0000121	74	1	2	2	1	1	1	1	1	1	1	1	1	1	1	1	1	1	1	1	1	1	1	1	1	1	1	1	1	1	1	1	1	1	1	1	1	1	1	1	1	1	1	1	1	1	2	1
OG0000077	HOG0000122	74	1	1	1	1	1	1	1	1	1	1	1	1	1	1	1	1	1	1	1	1	1	1	1	1	1	1	1	1	1	1	1	1	1	1	1	1	1	1	1	1	1	1	1	1	1	1	1
OG0000078	HOG0000123	74	1	2	1	1	1	1	1	1	1	1	1	1	1	1	1	1	1	1	1	1	1	1	1	1	1	1	1	1	1	1	1	1	1	1	1	1	1	1	1	1	1	1	2	1	1	1	1
OG0000079	HOG0000124	74	1	2	1	1	1	1	1	1	1	1	1	1	1	1	1	1	1	1	1	1	2	1	1	1	1	1	1	1	1	1	1	1	1	1	1	1	1	1	1	1	1	1	1	1	1	1	1
OG0000080	HOG0000125	74	1	2	1	1	1	1	1	1	1	1	1	1	1	1	1	1	1	1	1	1	1	1	1	1	1	1	1	1	1	1	1	1	1	1	1	1	1	1	1	1	1	1	1	1	1	1	1
OG0000081	HOG0000126	74	1	2	1	1	1	1	1	1	1	1	1	1	1	1	1	1	1	1	1	1	2	1	1	1	1	1	1	1	1	1	1	1	1	1	1	1	1	1	1	1	1	1	1	1	1	1	1
OG0000082	HOG0000127	74	1	2	1	1	1	1	1	1	1	1	1	1	1	1	1	1	1	1	1	1	1	1	1	1	1	1	1	1	1	1	1	1	1	1	1	1	1	1	1	1	1	1	1	1	1	1	1
OG0000083	HOG0000128	74	1	2	1	1	1	1	1	1	1	1	1	1	1	1	1	1	1	1	1	1	1	1	1	1	1	1	1	1	1	1	1	1	1	1	1	1	1	1	1	1	1	1	1	1	1	1	1
OG0000084	HOG0000129	74	1	2	1	1	1	1	1	1	1	1	1	1	1	1	1	1	1	1	1	1	1	1	1	1	1	1	1	1	1	1	1	1	1	1	1	1	1	1	1	1	1	1	1	1	1	1	1
OG0000085	HOG0000130	74	1	2	1	1	1	1	1	1	1	1	1	1	1	1	1	1	1	1	1	1	1	1	1	1	1	1	1	1	1	1	1	1	1	1	1	1	2	1	1	1	1	1	1	1	1	1	1
OG0000086	HOG0000131	74	1	2	1	1	1	1	1	1	1	1	1	1	1	1	1	1	1	1	1	1	1	1	1	1	1	1	1	1	1	1	1	1	1	1	1	1	1	1	1	1	1	1	1	1	1	1	1
OG0000087	HOG0000132	72	1	2	1	1	1	1	1	1	1	1	1	1	1	1	1	1	1	1	1	1	1	1	1	1	1	1	1	1	1	1	1	0	1	1	1	1	0	1	1	1	1	1	1	1	1	1	1
OG0000088	HOG0000133	73	1	3	1	1	1	1	1	1	1	1	1	1	1	1	1	1	1	1	1	1	1	1	1	1	1	1	1	1	1	1	1	1	1	1	1	1	0	1	1	1	1	1	1	1	1	1	1
OG0000089	HOG0000134	74	1	2	1	1	1	1	1	1	1	1	1	1	1	1	1	1	1	1	1	1	1	1	1	1	1	1	1	1	1	1	1	1	1	1	1	1	1	1	1	1	1	1	1	1	1	1	1
OG0000090	HOG0000135	74	1	2	1	1	1	1	1	1	1	1	1	1	1	1	1	1	1	1	1	1	1	1	1	1	1	1	1	1	1	1	1	1	1	1	1	1	1	1	1	1	1	1	1	1	1	1	1
OG0000091	HOG0000136	74	1	3	1	1	1	1	1	1	1	1	1	1	1	1	1	1	1	1	1	1	1	1	1	1	1	1	1	1	1	3	1	1	1	1	1	1	1	1	1	1	1	1	1	1	1	1	1
OG0000092	HOG0000137	74	1	2	1	1	1	1	1	1	1	1	1	1	1	1	1	1	1	1	2	1	1	1	1	1	1	1	1	1	1	1	1	1	1	1	1	1	1	1	1	1	1	1	1	1	1	1	1
OG0000093	HOG0000138	74	1	2	1	1	1	1	1	1	1	1	1	1	1	1	1	1	1	1	1	1	1	1	1	1	1	1	1	1	1	1	1	1	1	1	1	1	1	1	1	2	1	1	1	2	1	1	1
OG0000094	HOG0000139	74	1	1	1	1	1	1	1	1	1	1	1	1	1	1	1	1	1	1	1	1	1	1	1	1	1	1	1	1	1	1	1	1	1	1	1	1	1	1	1	1	1	1	1	1	1	1	1
OG0000095	HOG0000140	74	1	2	1	1	1	1	1	1	1	1	1	1	1	1	1	1	1	1	1	1	1	1	1	1	1	1	1	1	1	1	1	1	1	1	1	1	1	1	1	1	2	1	1	1	1	1	1
OG0000096	HOG0000141	74	1	1	1	1	1	1	1	1	1	1	1	1	1	1	1	1	1	1	1	1	1	1	1	1	1	1	1	1	1	1	1	1	1	1	1	1	1	1	1	1	1	1	1	1	1	1	1
OG0000097	HOG0000142	74	1	2	1	1	1	1	1	1	1	1	1	1	1	1	1	1	1	1	2	1	1	1	1	1	1	1	1	1	1	1	1	1	1	1	1	1	1	2	1	1	1	1	1	1	1	1	1
OG0000098	HOG0000143	74	1	2	1	1	1	1	1	1	1	1	1	1	1	1	1	1	1	1	1	1	1	1	1	1	1	1	1	1	1	1	1	1	1	1	1	1	1	1	1	1	1	1	1	1	1	1	1
OG0000099	HOG0000144	74	1	1	1	1	1	1	1	1	1	1	1	1	1	1	1	1	1	1	1	1	1	1	1	1	1	1	1	1	1	1	1	1	1	1	1	1	1	1	1	1	1	1	1	1	1	1	1
OG0000100	HOG0000145	74	1	2	1	1	1	1	1	1	1	1	1	1	1	1	1	1	1	1	1	1	1	1	1	1	1	1	1	1	1	1	1	1	1	1	1	1	1	1	1	1	1	1	1	1	1	1	1
OG0000101	HOG0000146	74	1	2	1	1	1	1	1	1	1	1	1	1	1	1	1	1	1	1	1	2	1	1	1	1	1	1	1	1	1	1	1	1	1	1	1	1	1	1	1	1	1	1	2	1	1	1	1
OG0000102	HOG0000147	74	1	3	1	1	1	1	1	1	1	1	1	1	1	1	1	1	1	1	1	1	1	1	1	1	1	1	1	1	1	1	1	1	1	1	1	1	1	1	1	1	1	1	1	1	1	1	1
OG0000103	HOG0000148	74	1	3	1	1	1	1	1	1	1	1	1	1	1	1	1	1	1	1	1	3	1	1	1	1	1	1	1	1	1	1	1	1	1	1	1	1	1	1	1	1	1	1	1	1	1	1	1
OG0000104	HOG0000149	74	1	1	1	1	1	1	1	1	1	1	1	1	1	1	1	1	1	1	1	1	1	1	1	1	1	1	1	1	1	1	1	1	1	1	1	1	1	1	1	1	1	1	1	1	1	1	1
OG0000105	HOG0000150	74	1	2	1	1	1	1	1	1	1	1	1	1	1	1	1	1	2	1	1	1	1	1	1	1	1	1	1	1	1	1	1	1	1	1	1	1	1	1	1	1	1	1	1	1	1	1	1
OG0000106	HOG0000151	74	1	2	1	1	1	1	1	1	1	1	1	1	1	1	1	1	1	1	1	1	1	1	1	1	1	1	1	1	1	1	1	1	1	1	1	1	1	1	1	1	2	1	1	1	1	1	1
OG0000107	HOG0000152	74	1	2	1	1	1	1	1	1	1	1	1	1	1	1	1	1	1	1	1	1	1	1	1	1	1	1	1	1	1	1	1	1	1	1	2	1	1	1	1	1	1	1	1	1	1	1	1
OG0000108	HOG0000153	74	1	2	1	1	1	1	1	1	1	1	1	1	1	1	1	1	1	1	1	1	1	1	1	1	1	1	1	1	1	1	1	1	1	1	1	1	1	1	1	1	1	1	1	1	1	1	1
OG0000109	HOG0000154	74	1	3	1	1	1	1	1	1	1	1	1	1	1	1	1	1	1	1	1	1	1	1	1	1	1	1	1	1	1	1	1	1	1	1	1	1	1	1	1	1	1	1	1	1	1	1	1
OG0000110	HOG0000155	74	1	2	1	1	1	1	1	1	1	1	1	1	1	1	1	1	1	1	1	1	1	1	1	1	1	1	1	1	1	1	1	1	1	1	2	1	1	1	1	1	1	1	1	1	1	1	1
OG0000111	HOG0000156	74	1	2	1	1	1	1	1	1	1	1	1	1	1	1	1	1	1	1	1	1	1	1	1	1	1	1	1	1	1	1	1	1	1	1	1	1	1	1	1	1	1	1	1	1	1	1	1
OG0000112	HOG0000157	74	1	2	1	1	1	1	1	1	1	1	1	1	1	1	1	1	1	1	1	2	1	1	1	1	1	1	1	1	1	1	1	1	1	1	1	1	1	1	1	1	1	1	1	1	1	1	1
OG0000113	HOG0000158	74	1	2	1	1	1	1	1	1	1	1	1	1	1	1	1	1	1	1	1	1	1	1	1	1	1	1	1	1	1	1	1	1	1	1	1	1	1	1	1	2	1	1	1	1	1	1	1
OG0000114	HOG0000159	74	1	2	1	1	1	1	1	1	1	1	1	1	1	1	1	2	1	1	1	1	1	1	1	1	1	1	1	1	1	1	1	1	1	1	1	1	1	1	1	1	1	1	1	1	1	1	1
OG0000115	HOG0000160	74	1	1	1	1	1	1	1	1	1	1	1	1	1	1	1	1	1	1	1	1	1	1	1	1	1	1	1	1	1	1	1	1	1	1	1	1	1	1	1	1	1	1	1	1	1	1	1
OG0000116	HOG0000161	74	1	2	1	1	1	1	1	1	1	1	1	1	1	1	1	1	1	1	1	2	1	1	1	1	1	1	1	1	1	1	1	1	1	1	1	1	1	1	1	1	1	1	1	1	1	1	1
OG0000117	HOG0000162	74	1	2	1	1	2	1	1	1	1	1	1	1	1	1	1	1	1	1	1	1	1	1	1	1	1	1	1	1	1	1	1	1	1	1	1	1	1	1	1	1	1	1	1	1	1	1	1
OG0000118	HOG0000163	74	1	1	1	1	1	1	1	1	1	1	1	1	1	1	1	1	1	1	1	1	1	1	1	1	1	1	1	1	1	1	1	1	1	1	1	1	1	1	1	1	1	1	1	1	1	1	1
OG0000119	HOG0000164	74	1	1	1	1	1	1	1	1	1	1	1	1	1	1	1	1	1	1	1	1	1	1	1	1	1	1	1	1	1	1	1	1	1	1	1	1	1	1	1	1	1	1	1	1	1	1	1
OG0000120	HOG0000165	74	1	2	1	1	1	1	1	1	1	1	1	1	1	1	1	1	1	1	1	1	1	1	1	1	1	1	1	1	1	1	1	1	1	1	1	1	1	1	1	1	1	1	1	1	1	1	1
OG0000121	HOG0000166	74	1	2	1	1	1	1	1	1	1	1	1	1	1	1	1	1	1	1	1	1	1	1	1	1	1	1	1	1	1	1	1	1	1	1	1	1	1	2	1	1	1	1	1	1	1	1	1
OG0000122	HOG0000167	74	1	2	1	1	1	1	1	1	1	1	1	1	1	1	1	1	1	1	1	1	1	1	1	1	1	1	1	1	1	2	1	1	1	1	1	1	1	1	1	1	1	1	1	1	1	1	1
OG0000123	HOG0000168	74	1	1	1	1	1	1	1	1	1	1	1	1	1	1	1	1	1	1	1	1	1	1	1	1	1	1	1	1	1	1	1	1	1	1	1	1	1	1	1	1	1	1	1	1	1	1	1
OG0000124	HOG0000169	74	1	2	1	1	1	1	1	1	1	1	1	1	1	1	1	1	1	1	1	1	1	1	1	1	1	1	1	1	1	1	1	1	1	1	1	1	1	1	1	1	1	1	1	1	1	1	1
OG0000125	HOG0000170	74	1	2	1	1	1	1	1	1	1	1	1	1	1	1	1	1	1	1	2	1	1	1	1	1	1	1	1	1	1	1	1	1	1	1	1	1	1	1	1	1	1	1	1	1	1	1	1
OG0000126	HOG0000171	74	1	2	1	2	1	1	1	1	1	1	1	1	1	1	1	1	1	1	1	1	1	1	1	1	1	1	1	1	1	1	1	1	1	1	1	1	1	1	1	1	1	1	1	1	1	1	1
OG0000127	HOG0000172	74	1	2	1	1	1	1	1	1	1	1	1	1	1	1	1	1	1	1	1	1	1	1	1	1	1	1	1	1	1	1	1	1	1	1	1	1	1	1	1	1	1	1	1	1	1	1	1
OG0000128	HOG0000173	74	1	2	1	1	1	1	1	1	1	1	1	1	1	1	1	1	1	1	1	1	1	1	1	1	1	1	1	1	1	1	1	1	1	1	1	1	1	1	1	1	1	1	1	1	1	1	1
OG0000129	HOG0000174	74	1	2	1	2	1	1	1	1	1	1	1	1	1	1	1	1	1	1	1	1	1	1	1	1	1	1	1	1	1	1	1	1	1	1	1	1	1	1	1	1	1	1	1	1	1	1	1
OG0000130	HOG0000175	74	1	2	1	1	1	1	1	1	1	1	1	1	1	1	1	1	1	1	1	1	1	1	1	1	1	1	1	1	1	1	1	1	1	1	1	1	1	1	1	1	1	1	1	1	1	1	1
OG0000131	HOG0000176	74	1	2	1	1	1	1	1	1	1	1	1	1	1	1	1	1	1	1	1	1	1	1	1	1	1	1	1	1	1	1	1	1	1	1	1	1	1	1	1	1	2	1	1	1	1	1	1
OG0000132	HOG0000177	74	1	1	1	1	1	1	1	1	1	1	1	1	1	1	1	1	1	1	1	1	1	1	1	1	1	1	1	1	1	1	1	1	1	1	1	1	1	1	1	1	1	1	1	1	1	1	1
OG0000133	HOG0000178	74	1	2	1	1	1	1	1	1	1	1	1	1	1	1	1	1	1	1	1	1	1	1	1	1	1	1	1	1	1	1	1	1	1	1	1	2	1	1	1	1	1	1	1	1	1	1	1
OG0000134	HOG0000179	74	1	2	1	1	1	1	1	1	1	1	1	1	1	1	1	1	1	1	1	1	1	1	1	1	1	1	1	1	1	1	1	1	1	1	1	1	2	1	1	1	1	1	1	1	1	1	1
OG0000135	HOG0000180	74	1	1	1	1	1	1	1	1	1	1	1	1	1	1	1	1	1	1	1	1	1	1	1	1	1	1	1	1	1	1	1	1	1	1	1	1	1	1	1	1	1	1	1	1	1	1	1
OG0000136	HOG0000181	74	1	1	1	1	1	1	1	1	1	1	1	1	1	1	1	1	1	1	1	1	1	1	1	1	1	1	1	1	1	1	1	1	1	1	1	1	1	1	1	1	1	1	1	1	1	1	1
OG0000137	HOG0000182	74	1	2	1	1	1	1	1	1	1	1	1	1	1	1	1	1	1	1	1	1	1	1	1	1	1	1	1	1	1	1	1	1	1	1	1	1	1	1	1	1	1	1	1	1	1	1	1
OG0000138	HOG0000183	74	1	1	1	1	1	1	1	1	1	1	1	1	1	1	1	1	1	1	1	1	1	1	1	1	1	1	1	1	1	1	1	1	1	1	1	1	1	1	1	1	1	1	1	1	1	1	1
OG0000139	HOG0000184	74	1	2	1	1	1	1	1	1	1	1	1	1	1	1	1	1	1	1	1	1	1	1	1	1	1	1	1	1	1	1	1	1	1	1	1	1	1	1	1	1	1	1	1	1	1	1	1
OG0000140	HOG0000185	74	1	2	1	1	1	1	1	1	1	1	1	1	1	1	1	1	1	1	1	1	1	1	1	1	1	1	1	1	1	1	1	1	1	1	1	1	1	1	1	1	1	1	1	1	1	1	1
OG0000141	HOG0000186	74	1	2	1	1	1	1	1	1	1	1	1	1	1	1	1	1	1	1	1	1	1	1	1	1	1	1	1	1	1	1	1	1	1	1	1	1	1	1	1	1	1	1	1	1	1	1	1
OG0000142	HOG0000187	74	1	2	1	1	1	1	1	1	1	1	1	1	1	1	1	1	1	1	1	1	1	1	1	1	1	1	1	1	1	1	1	1	1	1	1	1	1	1	1	1	1	1	1	1	1	1	1
OG0000143	HOG0000188	74	1	2	1	1	1	1	1	1	1	1	1	1	1	1	1	1	1	1	1	1	1	1	1	1	1	1	1	1	1	1	1	1	1	1	1	1	1	1	1	1	1	1	1	1	1	1	1
OG0000144	HOG0000189	74	1	1	1	1	1	1	1	1	1	1	1	1	1	1	1	1	1	1	1	1	1	1	1	1	1	1	1	1	1	1	1	1	1	1	1	1	1	1	1	1	1	1	1	1	1	1	1
OG0000145	HOG0000190	74	1	2	1	1	1	1	1	1	1	1	1	1	1	1	1	1	1	1	1	1	1	1	1	1	1	1	1	1	1	1	1	1	1	1	1	2	1	1	1	1	1	1	1	1	1	1	1
OG0000146	HOG0000191	74	1	2	1	1	1	1	1	1	1	1	1	1	1	1	1	1	1	1	1	2	1	1	1	1	1	1	1	1	1	1	1	1	1	1	1	1	1	1	1	1	1	1	1	1	1	1	1
OG0000147	HOG0000192	74	1	1	1	1	1	1	1	1	1	1	1	1	1	1	1	1	1	1	1	1	1	1	1	1	1	1	1	1	1	1	1	1	1	1	1	1	1	1	1	1	1	1	1	1	1	1	1
OG0000148	HOG0000193	74	1	2	1	1	1	1	1	1	1	1	1	1	1	1	1	1	1	1	1	1	2	1	1	1	1	1	1	1	1	1	1	1	1	1	1	1	1	1	1	1	1	1	1	1	1	1	1
OG0000149	HOG0000194	74	1	2	1	1	1	1	1	1	1	1	1	1	1	1	1	1	1	1	1	1	1	1	1	1	1	1	1	1	1	1	1	1	1	1	1	1	1	1	1	1	1	1	1	1	1	1	1
OG0000150	HOG0000195	74	1	2	1	1	1	1	1	1	1	1	1	1	1	1	1	1	1	1	1	1	1	1	1	1	1	1	1	1	1	1	1	1	1	1	1	1	1	1	1	1	1	1	1	1	1	1	1
OG0000151	HOG0000196	74	1	2	1	1	1	1	1	1	1	1	1	1	1	1	1	1	1	1	1	1	1	1	1	1	1	1	1	1	1	1	1	1	1	1	1	1	1	1	1	1	1	1	1	1	1	1	1
OG0000152	HOG0000197	74	1	2	1	1	1	1	1	1	1	1	1	1	1	1	1	1	1	1	1	1	1	1	1	1	1	1	1	1	1	1	1	1	1	1	1	1	1	1	1	1	1	1	1	1	1	1	1
OG0000153	HOG0000198	74	1	2	1	1	1	1	1	1	1	1	1	1	1	1	1	1	1	1	1	1	1	1	1	1	1	1	1	1	1	1	1	1	1	1	1	1	1	1	1	1	2	1	1	1	1	1	1
OG0000154	HOG0000199	74	1	2	1	1	1	1	1	1	1	1	1	1	1	1	1	1	1	1	2	1	1	1	1	1	1	1	1	1	1	1	1	1	1	1	1	1	1	1	1	1	1	1	1	1	1	1	1
OG0000155	HOG0000200	74	1	1	1	1	1	1	1	1	1	1	1	1	1	1	1	1	1	1	1	1	1	1	1	1	1	1	1	1	1	1	1	1	1	1	1	1	1	1	1	1	1	1	1	1	1	1	1
OG0000156	HOG0000201	74	1	2	1	1	1	1	1	1	1	1	1	1	1	1	1	1	1	1	1	1	1	1	1	1	1	1	1	1	1	2	1	1	1	1	1	1	1	1	1	1	1	1	1	1	1	1	1
OG0000157	HOG0000202	74	1	2	1	1	1	1	1	1	1	1	1	1	1	1	1	1	1	1	1	1	1	1	1	1	1	1	1	1	1	1	1	1	1	1	1	1	2	1	1	1	1	1	1	1	1	1	1
OG0000158	HOG0000203	74	1	2	1	1	1	1	1	1	1	1	1	1	1	1	1	1	1	1	1	1	1	1	1	1	1	1	1	1	1	1	1	1	1	1	1	1	1	2	1	1	1	1	1	1	1	1	1
OG0000159	HOG0000204	74	1	1	1	1	1	1	1	1	1	1	1	1	1	1	1	1	1	1	1	1	1	1	1	1	1	1	1	1	1	1	1	1	1	1	1	1	1	1	1	1	1	1	1	1	1	1	1
OG0000160	HOG0000205	74	1	2	1	1	1	1	1	1	1	1	1	1	1	1	1	1	1	1	1	1	1	1	1	1	1	1	1	1	1	1	1	1	1	1	1	1	1	1	1	1	1	1	1	1	1	1	1
OG0000161	HOG0000206	74	1	2	1	1	1	1	1	1	1	1	1	1	2	1	1	1	1	1	1	1	1	1	1	1	1	1	1	1	1	1	1	1	1	1	1	1	1	1	1	1	1	1	1	1	1	1	1
OG0000162	HOG0000207	74	1	1	1	1	1	1	1	1	1	1	1	1	1	1	1	1	1	1	1	1	1	1	1	1	1	1	1	1	1	1	1	1	1	1	1	1	1	1	1	1	1	1	1	1	1	1	1
OG0000163	HOG0000208	74	1	2	1	1	1	1	1	1	1	1	1	1	1	1	1	1	1	1	1	1	1	1	1	1	1	1	1	1	1	1	1	1	1	1	1	1	1	2	1	1	1	1	1	1	1	1	1
OG0000164	HOG0000209	74	1	2	1	1	1	1	1	1	1	1	1	1	1	1	1	1	1	1	1	1	1	1	1	1	1	1	1	1	1	1	1	1	1	1	1	1	1	1	1	1	1	1	1	1	1	1	1
OG0000165	HOG0000210	74	1	2	1	1	1	1	1	1	2	1	1	1	1	1	1	1	1	1	1	1	1	1	1	1	1	1	1	1	1	1	1	1	1	1	1	1	1	1	1	1	1	1	1	1	1	1	1
OG0000166	HOG0000211	74	1	2	1	1	1	1	1	1	1	1	1	1	1	1	1	1	1	1	1	1	1	1	1	1	1	1	1	1	1	1	1	1	1	1	1	1	1	1	1	1	1	1	1	1	1	1	1
OG0000167	HOG0000212	74	1	2	1	1	1	1	1	1	1	1	1	1	1	1	1	1	1	1	1	1	2	1	1	1	1	1	1	1	1	1	1	1	1	1	1	1	1	1	1	1	1	1	1	1	1	1	1
OG0000168	HOG0000213	74	1	2	1	1	1	1	1	1	1	1	1	1	1	1	1	1	1	1	1	1	2	1	1	1	1	1	1	1	1	1	1	1	1	1	1	1	1	1	1	1	1	1	1	1	1	1	1
OG0000169	HOG0000214	74	1	2	1	1	1	1	1	1	1	1	1	1	1	1	1	1	1	1	1	1	2	1	1	1	1	1	1	1	1	1	1	1	1	1	1	1	1	1	1	1	1	1	1	1	1	1	1
OG0000170	HOG0000215	74	1	2	1	1	1	1	1	1	1	1	1	1	1	1	1	1	1	1	1	1	2	1	1	1	1	1	1	1	1	1	1	1	1	1	1	1	1	1	1	1	1	1	1	1	1	1	1
OG0000171	HOG0000216	74	1	1	1	1	1	1	1	1	1	1	1	1	1	1	1	1	1	1	1	1	1	1	1	1	1	1	1	1	1	1	1	1	1	1	1	1	1	1	1	1	1	1	1	1	1	1	1
OG0000172	HOG0000217	74	1	2	1	1	1	1	1	1	1	1	1	1	1	1	1	1	1	1	1	1	2	1	1	1	1	1	1	1	1	1	1	1	1	1	1	1	1	1	1	1	1	1	1	1	1	1	1
OG0000173	HOG0000218	74	1	2	1	1	1	1	1	1	1	1	1	1	1	1	1	1	1	1	1	1	1	1	1	1	1	1	1	1	1	1	1	1	1	1	1	1	1	1	1	1	1	1	1	1	1	1	1
OG0000174	HOG0000219	74	1	2	1	2	1	1	1	1	1	1	1	1	1	1	1	1	1	1	1	1	1	1	1	1	1	1	1	1	1	1	1	1	1	1	1	1	1	1	1	1	1	1	1	1	1	1	1
OG0000175	HOG0000220	74	1	1	1	1	1	1	1	1	1	1	1	1	1	1	1	1	1	1	1	1	1	1	1	1	1	1	1	1	1	1	1	1	1	1	1	1	1	1	1	1	1	1	1	1	1	1	1
OG0000176	HOG0000221	74	1	2	1	1	1	1	1	1	1	1	1	1	1	1	1	1	1	1	1	1	1	1	1	1	1	1	1	1	1	1	1	1	1	1	1	1	1	1	1	1	2	1	1	1	1	1	1
OG0000177	HOG0000222	74	1	2	1	1	1	1	1	1	1	1	1	1	1	1	1	1	1	1	2	1	1	1	1	1	1	1	1	1	1	1	1	1	1	1	1	1	1	1	1	1	1	1	1	1	1	1	1
OG0000178	HOG0000223	74	1	2	1	1	1	1	1	1	1	1	1	1	1	1	1	1	1	1	1	1	1	1	1	1	1	1	1	1	1	1	1	1	1	1	1	1	1	1	1	1	1	1	1	1	1	1	1
OG0000179	HOG0000224	74	1	2	1	1	1	1	1	1	1	1	1	1	1	1	1	1	1	1	1	1	1	1	1	1	1	1	1	1	1	1	1	1	1	1	1	1	1	1	1	1	1	1	1	1	1	1	1
OG0000180	HOG0000225	74	1	2	1	1	1	1	1	1	1	1	1	1	1	1	1	1	1	1	1	1	1	1	1	1	1	1	1	1	1	1	1	1	1	1	1	1	1	1	1	1	1	1	1	1	1	1	1
OG0000181	HOG0000226	74	1	2	1	1	1	1	1	1	1	1	1	1	1	1	1	1	1	1	1	1	1	1	1	1	1	1	1	1	1	1	1	1	1	1	1	1	1	1	1	1	1	1	1	1	1	1	1
OG0000182	HOG0000227	74	1	2	1	1	1	1	1	1	1	1	1	1	1	1	1	1	1	1	1	1	1	1	1	1	1	1	1	1	1	1	1	1	1	1	1	1	1	1	1	1	1	1	1	1	1	1	1
OG0000183	HOG0000228	74	1	2	1	1	1	1	1	1	1	1	1	1	1	1	1	1	1	1	1	1	1	1	1	1	1	1	1	1	1	1	1	1	1	1	1	1	1	1	1	1	1	1	1	1	1	1	1
OG0000184	HOG0000229	74	1	2	1	2	1	1	1	1	1	1	1	1	1	1	1	1	1	1	1	1	1	1	1	1	1	1	1	1	1	1	1	1	1	1	1	1	1	1	1	1	1	1	1	1	1	1	1
OG0000185	HOG0000230	74	1	2	1	1	1	1	1	1	1	1	1	1	1	1	1	1	1	1	1	1	1	1	1	1	1	2	1	1	1	1	1	1	1	1	1	1	1	1	1	1	1	1	1	1	1	1	1
OG0000186	HOG0000231	74	1	1	1	1	1	1	1	1	1	1	1	1	1	1	1	1	1	1	1	1	1	1	1	1	1	1	1	1	1	1	1	1	1	1	1	1	1	1	1	1	1	1	1	1	1	1	1
OG0000187	HOG0000232	74	1	1	1	1	1	1	1	1	1	1	1	1	1	1	1	1	1	1	1	1	1	1	1	1	1	1	1	1	1	1	1	1	1	1	1	1	1	1	1	1	1	1	1	1	1	1	1
OG0000188	HOG0000233	74	1	2	1	1	1	2	1	1	1	1	1	1	1	1	1	1	1	1	1	1	1	1	1	1	1	1	1	1	1	1	1	1	1	1	1	1	1	1	1	1	1	1	1	1	1	1	1
OG0000189	HOG0000234	74	1	2	1	1	1	1	1	1	1	1	1	1	1	1	1	1	1	1	1	1	1	1	1	1	1	1	1	1	1	1	1	1	1	1	1	1	1	2	1	1	1	1	1	1	1	1	1
OG0000190	HOG0000235	74	1	1	1	1	1	1	1	1	1	1	1	1	1	1	1	1	1	1	1	1	1	1	1	1	1	1	1	1	1	1	1	1	1	1	1	1	1	1	1	1	1	1	1	1	1	1	1
OG0000191	HOG0000236	74	1	2	1	1	1	1	2	1	1	1	1	1	1	1	1	1	1	1	1	1	1	1	1	1	1	1	1	1	1	1	1	1	1	1	1	1	1	1	1	1	1	1	1	1	1	1	1
OG0000192	HOG0000237	74	1	2	1	1	1	1	1	1	1	1	1	1	1	1	1	1	1	1	1	1	1	1	1	1	1	1	1	1	1	1	1	1	1	1	1	2	1	1	1	1	1	1	1	1	1	1	1
OG0000193	HOG0000238	74	1	2	1	1	1	1	1	1	1	1	1	1	1	1	1	1	1	1	1	1	1	1	1	1	1	1	1	1	1	1	1	1	1	1	1	1	1	1	1	1	1	1	1	1	1	1	1
OG0000194	HOG0000239	74	1	2	1	1	1	1	1	1	1	1	1	1	1	1	1	1	1	1	1	1	1	1	1	1	1	1	1	1	1	1	1	1	1	1	2	1	1	1	1	1	1	1	1	1	1	1	1
OG0000195	HOG0000240	74	1	1	1	1	1	1	1	1	1	1	1	1	1	1	1	1	1	1	1	1	1	1	1	1	1	1	1	1	1	1	1	1	1	1	1	1	1	1	1	1	1	1	1	1	1	1	1
OG0000196	HOG0000241	74	1	2	1	1	1	1	1	1	1	1	1	1	1	1	1	1	1	1	2	1	1	1	1	1	1	1	1	1	1	1	1	1	1	1	1	1	1	1	1	1	1	1	1	1	1	1	1
OG0000197	HOG0000242	74	1	2	1	1	1	1	1	1	1	1	1	1	1	1	1	1	1	1	1	1	1	1	1	1	1	1	1	1	1	1	1	1	1	1	1	1	1	1	1	1	1	1	1	1	1	1	1
OG0000198	HOG0000243	74	1	1	1	1	1	1	1	1	1	1	1	1	1	1	1	1	1	1	1	1	1	1	1	1	1	1	1	1	1	1	1	1	1	1	1	1	1	1	1	1	1	1	1	1	1	1	1
OG0000199	HOG0000244	74	1	1	1	1	1	1	1	1	1	1	1	1	1	1	1	1	1	1	1	1	1	1	1	1	1	1	1	1	1	1	1	1	1	1	1	1	1	1	1	1	1	1	1	1	1	1	1
OG0000200	HOG0000245	74	1	2	1	1	1	1	1	1	1	1	1	1	1	1	1	1	1	1	1	1	1	1	1	1	1	1	1	1	1	1	1	1	1	1	1	1	1	1	1	1	1	1	1	1	1	1	1
OG0000201	HOG0000246	74	1	2	1	1	1	1	1	1	1	1	1	1	1	1	1	1	1	1	1	1	1	1	1	1	1	1	1	1	1	1	1	1	1	1	1	1	1	1	1	1	1	1	1	1	1	1	1
OG0000202	HOG0000247	74	1	2	1	1	1	1	1	1	1	1	1	1	1	1	1	1	1	1	1	1	1	1	1	1	1	1	1	1	1	1	1	1	1	1	1	1	1	1	1	1	1	1	1	1	1	1	1
OG0000203	HOG0000248	74	1	2	1	1	1	1	1	1	1	1	1	1	1	1	1	1	1	1	1	1	1	1	1	1	1	1	1	1	1	1	1	1	1	1	1	1	1	1	1	1	1	1	1	2	1	1	1
OG0000204	HOG0000249	74	1	2	1	1	1	1	1	1	1	1	1	1	1	1	1	1	1	1	1	1	1	1	1	1	1	1	1	1	1	1	1	1	1	1	1	1	1	1	1	1	2	1	1	1	1	1	1
OG0000205	HOG0000250	74	1	2	1	1	1	1	1	1	1	2	1	1	1	1	1	1	1	1	1	1	1	1	1	1	1	1	1	1	1	1	1	1	1	1	1	1	1	1	1	1	1	1	1	1	1	1	1
OG0000206	HOG0000251	74	1	2	1	1	1	1	1	1	1	2	1	1	1	1	1	1	1	1	1	1	1	1	1	1	1	1	1	1	1	1	1	1	1	1	1	1	1	1	1	1	1	1	1	1	1	1	1
OG0000207	HOG0000252	74	1	2	1	1	1	1	1	1	1	1	1	1	1	1	1	1	1	1	1	1	1	1	1	1	1	1	1	1	1	1	1	1	1	1	2	1	1	1	1	1	1	1	1	1	1	1	1
OG0000208	HOG0000253	74	1	1	1	1	1	1	1	1	1	1	1	1	1	1	1	1	1	1	1	1	1	1	1	1	1	1	1	1	1	1	1	1	1	1	1	1	1	1	1	1	1	1	1	1	1	1	1
OG0000209	HOG0000254	74	1	2	1	1	1	1	1	1	1	1	1	1	1	1	1	1	1	1	1	1	1	1	1	1	1	1	1	1	1	1	1	1	1	1	1	1	1	1	1	1	1	1	1	1	1	1	1
OG0000210	HOG0000255	74	1	2	1	1	1	2	1	1	1	1	1	1	1	1	1	1	1	1	1	1	1	1	1	1	1	1	1	1	1	1	1	1	1	1	1	1	1	1	1	1	1	1	1	1	1	1	1
OG0000211	HOG0000256	74	1	2	1	2	1	1	1	1	1	1	1	1	1	1	1	1	1	1	1	1	1	1	1	1	1	1	1	1	1	1	1	1	1	1	1	1	1	1	1	1	1	1	1	1	1	1	1
OG0000212	HOG0000257	74	1	2	1	1	1	1	1	1	1	1	1	1	1	1	1	1	1	1	1	1	1	1	1	1	1	1	1	1	1	1	1	1	1	1	1	1	1	1	1	1	1	1	1	1	1	1	1
OG0000213	HOG0000258	74	1	2	1	1	1	1	1	1	1	1	1	1	1	1	1	1	1	1	1	2	1	1	1	1	1	1	1	1	1	1	1	1	1	1	1	1	1	1	1	1	1	1	1	1	1	1	1
OG0000214	HOG0000259	74	1	1	1	1	1	1	1	1	1	1	1	1	1	1	1	1	1	1	1	1	1	1	1	1	1	1	1	1	1	1	1	1	1	1	1	1	1	1	1	1	1	1	1	1	1	1	1
OG0000215	HOG0000260	74	1	2	1	1	1	1	1	1	1	1	1	1	1	1	1	1	1	1	1	1	1	1	1	1	1	1	1	1	1	1	1	1	1	1	1	1	2	1	1	1	1	1	1	1	1	1	1
OG0000216	HOG0000261	74	1	2	1	2	1	1	1	1	1	1	1	1	1	1	1	1	1	1	1	1	1	1	1	1	1	1	1	1	1	1	1	1	1	1	1	1	1	1	1	1	1	1	1	1	1	1	1
OG0000217	HOG0000262	74	1	1	1	1	1	1	1	1	1	1	1	1	1	1	1	1	1	1	1	1	1	1	1	1	1	1	1	1	1	1	1	1	1	1	1	1	1	1	1	1	1	1	1	1	1	1	1
OG0000218	HOG0000263	74	1	2	1	1	1	1	1	1	1	1	1	1	1	1	1	1	1	1	1	1	1	1	1	1	1	1	1	1	1	1	1	1	1	1	1	1	1	1	1	1	1	1	1	1	1	1	1
OG0000219	HOG0000264	74	1	2	1	1	1	1	1	1	1	1	1	1	1	1	1	1	1	1	1	1	1	1	1	1	1	1	1	1	1	1	1	1	1	1	1	1	1	1	1	1	1	1	1	1	1	1	1
OG0000220	HOG0000265	74	1	2	1	2	1	1	1	1	1	1	1	1	1	1	1	1	1	1	1	1	1	1	1	1	1	1	1	1	1	1	1	1	1	1	1	1	1	1	1	1	1	1	1	1	1	1	1
OG0000221	HOG0000266	74	1	2	1	2	1	1	1	1	1	1	1	1	1	1	1	1	1	1	1	1	1	1	1	1	1	1	1	1	1	1	1	1	1	1	1	1	1	1	1	1	1	1	1	1	1	1	1
OG0000222	HOG0000267	74	1	2	1	1	1	1	1	1	1	1	1	1	1	1	1	1	1	1	1	1	1	1	1	1	1	1	1	1	1	1	1	1	1	1	1	1	1	1	1	1	1	1	1	1	1	1	1
OG0000223	HOG0000268	74	1	2	1	1	1	1	1	1	1	1	1	1	1	1	1	1	1	1	1	1	1	1	1	1	1	1	1	1	1	1	1	1	1	1	1	1	1	1	1	1	1	1	1	1	1	1	1
OG0000224	HOG0000269	74	1	2	1	1	1	1	1	1	1	1	1	1	1	1	1	1	1	1	1	1	1	1	1	1	1	1	1	1	1	1	1	1	2	1	1	1	1	1	1	1	1	1	1	1	1	1	1
OG0000225	HOG0000270	74	1	1	1	1	1	1	1	1	1	1	1	1	1	1	1	1	1	1	1	1	1	1	1	1	1	1	1	1	1	1	1	1	1	1	1	1	1	1	1	1	1	1	1	1	1	1	1
OG0000226	HOG0000271	74	1	2	1	2	1	1	1	1	1	1	1	1	1	1	1	1	1	1	1	1	1	1	1	1	1	1	1	1	1	1	1	1	1	1	1	1	1	1	1	1	1	1	1	1	1	1	1
OG0000227	HOG0000272	74	1	2	1	1	1	1	1	1	1	1	1	1	1	1	1	1	1	1	1	1	1	1	1	1	1	1	1	1	1	1	1	1	1	1	1	1	1	1	1	1	1	1	1	1	1	1	1
OG0000228	HOG0000273	74	1	1	1	1	1	1	1	1	1	1	1	1	1	1	1	1	1	1	1	1	1	1	1	1	1	1	1	1	1	1	1	1	1	1	1	1	1	1	1	1	1	1	1	1	1	1	1
OG0000229	HOG0000274	74	1	2	1	1	1	1	1	1	1	1	1	1	1	1	1	1	1	1	1	1	1	1	1	1	1	1	1	1	1	1	1	1	1	1	1	1	1	1	1	1	1	1	1	1	1	1	1
OG0000230	HOG0000275	74	1	2	1	1	1	1	1	1	1	1	1	1	1	1	1	1	1	1	2	1	1	1	1	1	1	1	1	1	1	1	1	1	1	1	1	1	1	1	1	1	1	1	1	1	1	1	1
OG0000231	HOG0000276	70	1	2	1	2	1	1	1	1	1	1	1	1	2	1	1	1	1	1	1	1	1	1	1	1	1	1	1	1	1	1	1	2	1	1	1	1	1	0	1	1	1	1	1	1	1	1	1
OG0000232	HOG0000277	74	1	2	1	1	1	1	1	1	1	1	1	1	1	1	1	1	1	1	1	1	1	1	1	1	1	1	1	1	1	1	1	1	1	1	1	1	1	1	1	1	1	1	1	1	1	1	1
OG0000233	HOG0000278	74	1	2	1	1	1	1	1	1	1	1	1	1	1	1	1	1	1	1	1	1	1	1	1	1	1	1	1	1	1	2	1	1	1	1	1	1	1	1	1	1	1	1	1	1	1	1	1
OG0000234	HOG0000279	74	1	2	1	1	1	1	1	1	1	1	1	1	1	1	1	1	1	1	1	1	1	1	1	1	1	1	1	1	1	1	1	1	1	1	1	1	1	1	1	1	1	1	1	1	1	1	1
OG0000235	HOG0000280	74	1	2	1	1	1	1	1	1	1	1	1	1	1	1	1	1	1	1	1	1	1	1	1	1	1	1	1	1	1	1	1	1	1	1	1	1	1	1	1	1	1	1	1	1	1	1	1
OG0000236	HOG0000281	74	1	2	1	1	1	1	1	1	1	1	1	1	1	1	1	1	1	1	1	1	1	1	1	1	1	1	1	1	1	1	1	1	1	1	1	1	1	1	1	1	1	1	1	1	1	1	1
OG0000237	HOG0000282	74	1	2	1	1	1	1	1	1	1	1	1	1	1	1	1	1	1	1	1	1	1	1	1	1	1	1	1	1	1	1	1	1	1	1	1	1	1	1	1	1	1	1	1	1	1	1	1
OG0000238	HOG0000283	74	1	2	1	2	1	1	1	1	1	1	1	1	1	1	1	1	1	1	1	1	1	1	1	1	1	1	1	1	1	1	1	1	1	1	1	1	1	1	1	1	1	1	1	1	1	1	1
OG0000239	HOG0000284	74	1	2	1	1	1	1	1	1	1	1	1	1	1	1	1	1	1	1	1	1	1	1	1	1	1	1	1	1	1	1	1	1	1	1	1	1	1	1	1	1	1	1	1	1	1	1	1
OG0000240	HOG0000285	74	1	2	1	1	1	1	1	1	1	1	1	1	1	1	1	1	1	1	1	1	1	1	1	1	1	1	1	1	1	1	1	1	1	1	1	1	1	1	1	2	1	1	1	1	1	1	1
OG0000241	HOG0000286	74	1	1	1	1	1	1	1	1	1	1	1	1	1	1	1	1	1	1	1	1	1	1	1	1	1	1	1	1	1	1	1	1	1	1	1	1	1	1	1	1	1	1	1	1	1	1	1
OG0000242	HOG0000287	74	1	1	1	1	1	1	1	1	1	1	1	1	1	1	1	1	1	1	1	1	1	1	1	1	1	1	1	1	1	1	1	1	1	1	1	1	1	1	1	1	1	1	1	1	1	1	1
OG0000243	HOG0000288	74	1	2	1	1	1	1	1	1	1	1	1	1	1	1	1	1	1	1	1	1	1	1	1	1	1	1	1	1	1	1	1	1	1	1	1	1	1	1	1	1	1	1	1	1	1	1	1
OG0000244	HOG0000289	74	1	1	1	1	1	1	1	1	1	1	1	1	1	1	1	1	1	1	1	1	1	1	1	1	1	1	1	1	1	1	1	1	1	1	1	1	1	1	1	1	1	1	1	1	1	1	1
OG0000245	HOG0000290	74	1	1	1	1	1	1	1	1	1	1	1	1	1	1	1	1	1	1	1	1	1	1	1	1	1	1	1	1	1	1	1	1	1	1	1	1	1	1	1	1	1	1	1	1	1	1	1
OG0000246	HOG0000291	74	1	2	1	1	1	1	1	1	1	1	1	1	1	1	1	1	1	1	2	1	1	1	1	1	1	1	1	1	1	1	1	1	1	1	1	1	1	1	1	1	1	1	1	1	1	1	1
OG0000247	HOG0000292	74	1	2	1	1	1	1	1	1	1	1	1	1	1	1	1	1	1	1	1	1	1	1	1	1	1	1	1	1	1	1	1	1	1	1	1	1	1	1	1	1	1	1	1	1	1	1	1
OG0000248	HOG0000293	74	1	1	1	1	1	1	1	1	1	1	1	1	1	1	1	1	1	1	1	1	1	1	1	1	1	1	1	1	1	1	1	1	1	1	1	1	1	1	1	1	1	1	1	1	1	1	1
OG0000249	HOG0000294	74	1	2	1	1	1	1	1	1	1	1	1	1	1	1	1	1	1	1	2	1	1	1	1	1	1	1	1	1	1	1	1	1	1	1	1	1	1	1	1	1	1	1	1	1	1	1	1
OG0000250	HOG0000295	74	1	2	1	1	1	1	1	1	1	1	1	1	1	1	1	1	1	1	1	1	1	1	1	1	1	1	1	1	1	1	1	1	1	1	1	1	1	1	1	1	2	1	1	1	1	1	1
OG0000251	HOG0000296	74	1	2	1	1	1	1	1	1	1	1	1	1	1	1	1	1	1	1	1	1	1	1	1	1	1	1	1	1	1	1	1	1	1	1	1	1	1	1	1	1	1	1	1	1	1	1	1
OG0000252	HOG0000297	74	1	2	1	1	1	1	1	1	1	1	1	1	1	1	1	1	1	1	1	1	1	1	1	1	1	1	1	1	1	1	1	1	1	1	1	1	1	1	1	1	1	1	1	1	1	1	1
OG0000253	HOG0000298	74	1	2	1	1	1	1	1	1	1	1	1	1	1	1	1	1	1	1	1	1	1	1	1	1	1	1	1	1	1	2	1	1	1	1	1	1	1	1	1	1	1	1	1	1	1	1	1
OG0000254	HOG0000299	74	1	2	1	2	1	1	1	1	1	1	1	1	1	1	1	1	1	1	1	1	1	1	1	1	1	1	1	1	1	1	1	1	1	1	1	1	1	1	1	1	1	1	1	1	1	1	1
OG0000255	HOG0000300	74	1	2	1	1	1	1	1	1	1	1	1	1	1	1	1	1	1	1	1	1	1	1	1	1	1	1	1	1	1	1	1	1	1	1	1	1	1	1	1	1	1	1	1	1	1	1	1
OG0000256	HOG0000301	74	1	2	1	1	2	1	1	1	1	1	1	1	1	1	1	1	1	1	1	1	1	1	1	1	1	1	1	1	1	1	1	1	1	1	1	1	1	1	1	1	1	1	1	1	1	1	1
OG0000257	HOG0000302	74	1	2	1	2	1	1	1	1	1	1	1	1	1	1	1	1	1	1	1	1	1	1	1	1	1	1	1	1	1	1	1	1	1	1	1	1	1	1	1	1	1	1	1	1	1	1	1
OG0000258	HOG0000303	74	1	2	1	1	1	1	1	1	1	1	1	1	1	1	1	1	1	1	1	1	1	1	1	1	1	1	1	1	1	1	1	1	1	1	1	1	1	1	1	1	1	1	1	1	1	1	1
OG0000259	HOG0000304	74	1	2	1	1	1	1	1	1	1	1	1	1	1	1	1	1	1	1	1	1	1	1	1	1	1	1	1	1	1	1	1	1	1	1	1	1	1	1	1	1	1	1	1	1	1	1	1
OG0000260	HOG0000305	74	1	1	1	1	1	1	1	1	1	1	1	1	1	1	1	1	1	1	1	1	1	1	1	1	1	1	1	1	1	1	1	1	1	1	1	1	1	1	1	1	1	1	1	1	1	1	1
OG0000261	HOG0000306	74	1	2	1	1	1	1	1	1	1	1	1	1	1	1	1	1	1	1	1	1	1	1	1	1	1	1	1	1	1	2	1	1	1	1	1	1	1	1	1	1	1	1	1	1	1	1	1
OG0000262	HOG0000307	74	1	2	1	1	1	1	1	1	1	1	1	1	1	1	1	1	1	1	1	1	1	1	1	1	1	1	1	2	1	1	1	1	1	1	1	1	1	1	1	1	1	1	1	1	1	1	1
OG0000263	HOG0000308	74	1	2	1	1	1	1	1	1	1	1	1	1	1	1	1	1	1	1	1	1	2	1	1	1	1	1	1	1	1	1	1	1	1	1	1	1	1	1	1	1	1	1	1	1	1	1	1
OG0000264	HOG0000309	74	1	1	1	1	1	1	1	1	1	1	1	1	1	1	1	1	1	1	1	1	1	1	1	1	1	1	1	1	1	1	1	1	1	1	1	1	1	1	1	1	1	1	1	1	1	1	1
OG0000265	HOG0000310	74	1	2	1	1	1	1	1	1	1	1	1	1	1	1	1	1	1	1	1	1	1	1	1	1	1	1	1	1	1	1	1	1	1	1	1	1	1	1	1	2	1	1	1	1	1	1	1
OG0000266	HOG0000311	74	1	2	1	1	1	1	1	1	1	1	1	1	1	1	1	1	1	1	1	1	1	1	1	1	1	1	1	1	1	1	1	1	1	1	1	1	1	1	1	1	1	1	1	1	1	1	1
OG0000267	HOG0000312	74	1	2	1	1	1	1	1	1	1	1	1	1	1	1	1	1	1	1	1	1	1	1	1	1	1	1	1	1	1	1	1	1	1	1	1	1	1	1	1	1	1	1	1	1	1	1	1
OG0000268	HOG0000313	74	1	2	1	1	1	1	1	1	1	1	1	1	1	1	1	1	1	1	1	1	1	1	1	1	1	1	1	1	1	1	1	1	1	1	1	1	1	1	1	1	1	1	1	1	1	1	1
OG0000269	HOG0000314	74	1	1	1	1	1	1	1	1	1	1	1	1	1	1	1	1	1	1	1	1	1	1	1	1	1	1	1	1	1	1	1	1	1	1	1	1	1	1	1	1	1	1	1	1	1	1	1
OG0000270	HOG0000315	74	1	1	1	1	1	1	1	1	1	1	1	1	1	1	1	1	1	1	1	1	1	1	1	1	1	1	1	1	1	1	1	1	1	1	1	1	1	1	1	1	1	1	1	1	1	1	1
OG0000271	HOG0000316	74	1	2	1	1	1	1	1	1	1	1	1	1	1	1	1	1	1	1	1	1	1	1	1	1	1	1	1	1	1	1	1	1	1	1	1	1	1	1	1	1	1	1	1	1	1	1	1
OG0000272	HOG0000317	74	1	2	1	1	1	1	1	1	1	1	1	1	1	1	1	1	1	1	1	1	1	1	1	1	1	1	1	1	1	1	1	1	1	1	1	1	1	1	1	1	1	1	1	1	1	1	1
OG0000273	HOG0000318	74	1	2	1	1	1	1	1	1	1	1	1	1	1	1	1	1	1	1	1	1	1	1	1	1	1	1	1	1	1	1	1	1	1	1	1	1	1	1	1	1	1	1	1	1	1	1	1
OG0000274	HOG0000319	74	1	1	1	1	1	1	1	1	1	1	1	1	1	1	1	1	1	1	1	1	1	1	1	1	1	1	1	1	1	1	1	1	1	1	1	1	1	1	1	1	1	1	1	1	1	1	1
OG0000275	HOG0000320	74	1	1	1	1	1	1	1	1	1	1	1	1	1	1	1	1	1	1	1	1	1	1	1	1	1	1	1	1	1	1	1	1	1	1	1	1	1	1	1	1	1	1	1	1	1	1	1
OG0000276	HOG0000321	74	1	1	1	1	1	1	1	1	1	1	1	1	1	1	1	1	1	1	1	1	1	1	1	1	1	1	1	1	1	1	1	1	1	1	1	1	1	1	1	1	1	1	1	1	1	1	1
OG0000277	HOG0000322	74	1	2	1	1	1	1	1	1	1	1	1	1	1	1	1	1	1	1	1	1	1	1	1	1	1	1	1	1	1	1	1	1	1	1	1	1	1	1	1	1	1	1	1	1	1	1	1
OG0000278	HOG0000323	74	1	2	1	1	1	1	1	1	1	1	1	1	1	1	1	1	1	1	1	1	1	1	1	1	1	1	1	1	1	1	1	1	1	1	1	1	2	1	1	1	1	1	1	1	1	1	1
OG0000279	HOG0000324	74	1	2	1	1	1	1	1	1	1	1	1	1	1	1	1	1	1	1	1	1	1	1	1	1	1	2	1	1	1	1	1	1	1	1	1	1	1	1	1	1	1	1	1	1	1	1	1
OG0000280	HOG0000325	74	1	1	1	1	1	1	1	1	1	1	1	1	1	1	1	1	1	1	1	1	1	1	1	1	1	1	1	1	1	1	1	1	1	1	1	1	1	1	1	1	1	1	1	1	1	1	1
OG0000281	HOG0000326	74	1	1	1	1	1	1	1	1	1	1	1	1	1	1	1	1	1	1	1	1	1	1	1	1	1	1	1	1	1	1	1	1	1	1	1	1	1	1	1	1	1	1	1	1	1	1	1
OG0000282	HOG0000327	74	1	2	1	1	1	1	1	1	1	1	1	1	1	1	1	1	1	1	1	1	1	1	1	1	1	1	1	1	1	1	1	1	1	1	1	1	1	1	1	1	1	1	1	1	1	1	1
OG0000283	HOG0000328	74	1	1	1	1	1	1	1	1	1	1	1	1	1	1	1	1	1	1	1	1	1	1	1	1	1	1	1	1	1	1	1	1	1	1	1	1	1	1	1	1	1	1	1	1	1	1	1
OG0000284	HOG0000329	74	1	2	1	1	1	1	1	1	1	1	1	1	1	1	1	1	1	1	1	1	1	1	1	1	1	1	1	1	1	1	1	1	2	1	1	1	1	1	1	1	1	1	1	1	1	1	1
OG0000285	HOG0000330	74	1	1	1	1	1	1	1	1	1	1	1	1	1	1	1	1	1	1	1	1	1	1	1	1	1	1	1	1	1	1	1	1	1	1	1	1	1	1	1	1	1	1	1	1	1	1	1
OG0000286	HOG0000331	74	1	2	1	1	1	1	1	1	1	1	1	1	1	1	1	1	1	1	1	1	1	1	1	1	1	1	1	1	1	1	1	1	1	1	1	2	1	1	1	1	1	1	1	1	1	1	1
OG0000287	HOG0000332	74	1	2	1	2	1	1	1	1	1	1	1	1	1	1	1	1	1	1	1	1	1	1	1	1	1	1	1	1	1	1	1	1	1	1	1	1	1	1	1	1	1	1	1	1	1	1	1
OG0000288	HOG0000333	74	1	2	1	1	1	1	2	1	1	1	1	1	1	1	1	1	1	1	1	1	1	1	1	1	1	1	1	1	1	1	1	1	1	1	1	1	1	1	1	1	1	1	1	1	1	1	1
OG0000289	HOG0000334	74	1	1	1	1	1	1	1	1	1	1	1	1	1	1	1	1	1	1	1	1	1	1	1	1	1	1	1	1	1	1	1	1	1	1	1	1	1	1	1	1	1	1	1	1	1	1	1
OG0000290	HOG0000335	74	1	1	1	1	1	1	1	1	1	1	1	1	1	1	1	1	1	1	1	1	1	1	1	1	1	1	1	1	1	1	1	1	1	1	1	1	1	1	1	1	1	1	1	1	1	1	1
OG0000291	HOG0000336	74	1	1	1	1	1	1	1	1	1	1	1	1	1	1	1	1	1	1	1	1	1	1	1	1	1	1	1	1	1	1	1	1	1	1	1	1	1	1	1	1	1	1	1	1	1	1	1
OG0000292	HOG0000337	74	1	1	1	1	1	1	1	1	1	1	1	1	1	1	1	1	1	1	1	1	1	1	1	1	1	1	1	1	1	1	1	1	1	1	1	1	1	1	1	1	1	1	1	1	1	1	1
OG0000293	HOG0000338	74	1	2	1	1	1	1	1	1	1	1	1	1	1	1	1	1	1	1	1	1	1	1	1	1	1	1	1	1	1	1	1	1	1	1	1	1	1	1	1	1	1	1	1	1	1	1	1
OG0000294	HOG0000339	74	1	2	1	1	1	1	1	1	1	1	1	1	1	1	1	1	1	1	1	1	1	1	1	1	1	1	1	1	1	2	1	1	1	1	1	1	1	1	1	1	1	1	1	1	1	1	1
OG0000295	HOG0000340	74	1	2	1	1	1	1	1	1	1	1	1	1	1	1	1	1	1	1	1	2	1	1	1	1	1	1	1	1	1	1	1	1	1	1	1	1	1	1	1	1	1	1	1	1	1	1	1
OG0000296	HOG0000341	74	1	1	1	1	1	1	1	1	1	1	1	1	1	1	1	1	1	1	1	1	1	1	1	1	1	1	1	1	1	1	1	1	1	1	1	1	1	1	1	1	1	1	1	1	1	1	1
OG0000297	HOG0000342	74	1	1	1	1	1	1	1	1	1	1	1	1	1	1	1	1	1	1	1	1	1	1	1	1	1	1	1	1	1	1	1	1	1	1	1	1	1	1	1	1	1	1	1	1	1	1	1
OG0000298	HOG0000343	74	1	2	1	1	1	1	1	1	1	1	1	1	1	1	1	1	1	1	1	1	1	1	1	1	1	1	1	1	1	1	1	1	1	1	1	1	1	1	1	1	1	1	1	1	1	1	1
OG0000299	HOG0000344	74	1	1	1	1	1	1	1	1	1	1	1	1	1	1	1	1	1	1	1	1	1	1	1	1	1	1	1	1	1	1	1	1	1	1	1	1	1	1	1	1	1	1	1	1	1	1	1
OG0000300	HOG0000345	74	1	2	1	1	1	1	1	1	1	1	1	1	1	1	1	1	1	1	1	1	1	1	1	1	1	1	1	1	1	1	1	1	1	1	1	1	1	1	1	1	1	1	1	1	1	1	1
OG0000301	HOG0000346	74	1	2	1	1	1	1	1	1	1	1	1	1	1	1	1	1	1	1	1	1	1	1	1	1	1	1	1	1	1	1	1	1	1	1	1	1	1	1	1	2	1	1	1	1	1	1	1
OG0000302	HOG0000347	74	1	1	1	1	1	1	1	1	1	1	1	1	1	1	1	1	1	1	1	1	1	1	1	1	1	1	1	1	1	1	1	1	1	1	1	1	1	1	1	1	1	1	1	1	1	1	1
OG0000303	HOG0000348	74	1	2	1	1	1	1	1	1	1	1	1	1	1	1	1	1	1	1	1	1	1	1	1	1	1	1	1	2	1	1	1	1	1	1	1	1	1	1	1	1	1	1	1	1	1	1	1
OG0000304	HOG0000349	74	1	1	1	1	1	1	1	1	1	1	1	1	1	1	1	1	1	1	1	1	1	1	1	1	1	1	1	1	1	1	1	1	1	1	1	1	1	1	1	1	1	1	1	1	1	1	1
OG0000305	HOG0000350	74	1	2	1	1	1	1	1	1	1	1	1	1	1	1	1	1	1	1	1	1	1	1	1	1	1	1	1	1	1	1	1	1	1	1	1	1	1	1	1	1	1	1	1	1	1	1	1
OG0000306	HOG0000351	74	1	2	1	1	1	1	1	1	1	1	1	1	1	1	1	1	1	1	1	1	1	1	1	1	1	1	1	1	1	1	1	1	1	1	1	1	1	1	1	1	1	1	1	1	1	1	1
OG0000307	HOG0000352	74	1	1	1	1	1	1	1	1	1	1	1	1	1	1	1	1	1	1	1	1	1	1	1	1	1	1	1	1	1	1	1	1	1	1	1	1	1	1	1	1	1	1	1	1	1	1	1
OG0000308	HOG0000353	74	1	1	1	1	1	1	1	1	1	1	1	1	1	1	1	1	1	1	1	1	1	1	1	1	1	1	1	1	1	1	1	1	1	1	1	1	1	1	1	1	1	1	1	1	1	1	1
OG0000309	HOG0000354	74	1	2	1	1	1	1	1	1	1	1	1	1	1	1	1	1	1	1	1	1	1	1	1	1	1	1	1	1	1	1	1	1	1	1	1	1	1	1	1	1	1	1	1	1	1	1	1
OG0000310	HOG0000355	74	1	2	1	1	1	1	1	1	1	1	1	1	1	1	1	1	1	1	1	1	1	1	1	1	1	1	1	1	1	1	1	1	1	1	1	1	1	1	1	1	1	1	1	1	1	1	1
OG0000311	HOG0000356	74	1	2	1	1	1	1	1	1	1	1	1	1	1	1	1	1	1	1	1	1	1	1	1	1	1	1	1	1	1	1	1	1	1	1	1	2	1	1	1	1	1	1	1	1	1	1	1
OG0000312	HOG0000357	74	1	2	1	1	1	1	1	1	1	1	1	1	1	1	1	1	1	1	1	1	1	1	1	1	1	1	1	1	1	1	1	1	1	1	1	1	1	1	1	1	1	1	1	1	1	1	1
OG0000313	HOG0000358	74	1	2	1	1	1	1	1	1	1	1	1	1	1	1	1	1	1	1	1	1	1	1	1	1	1	1	1	1	1	1	1	1	1	1	1	1	1	2	1	1	1	1	1	1	1	1	1
OG0000314	HOG0000359	74	1	2	1	1	1	1	1	1	1	1	1	1	1	1	1	1	1	1	1	1	1	1	1	1	1	1	1	1	1	1	1	1	1	1	2	1	1	1	1	1	1	1	1	1	1	1	1
OG0000315	HOG0000360	74	1	2	1	1	1	1	1	1	1	1	1	1	1	1	1	1	1	1	1	1	1	1	1	1	1	1	1	1	1	1	1	1	1	1	1	1	1	1	1	1	1	1	1	1	1	1	1
OG0000316	HOG0000361	74	1	2	1	1	1	1	1	1	1	1	1	1	1	1	1	1	1	1	1	1	1	1	1	1	1	1	1	1	1	1	1	1	1	1	1	1	1	1	1	1	1	1	1	1	1	1	1
OG0000317	HOG0000362	74	1	2	1	1	1	1	1	1	1	1	1	1	1	1	1	1	1	1	1	1	1	1	1	1	1	1	1	1	1	1	1	1	1	1	1	1	1	1	1	1	1	1	1	1	1	1	1
OG0000318	HOG0000363	74	1	2	1	1	1	1	1	1	1	1	1	1	1	1	1	1	1	1	1	1	1	1	1	1	1	1	1	1	1	1	1	1	1	1	1	1	1	1	1	1	1	1	1	1	1	1	1
OG0000319	HOG0000364	74	1	2	1	1	1	1	1	1	1	1	1	1	1	1	1	1	1	1	1	1	1	1	1	1	1	1	1	1	1	1	1	1	1	1	1	1	1	1	1	1	1	1	1	1	1	1	1
OG0000320	HOG0000365	74	1	2	1	1	1	1	1	1	1	1	1	1	1	1	1	1	1	1	1	1	1	1	1	1	1	1	1	1	1	1	1	1	1	1	1	1	1	1	1	1	1	1	1	1	1	1	1
OG0000321	HOG0000366	74	1	1	1	1	1	1	1	1	1	1	1	1	1	1	1	1	1	1	1	1	1	1	1	1	1	1	1	1	1	1	1	1	1	1	1	1	1	1	1	1	1	1	1	1	1	1	1
OG0000322	HOG0000367	74	1	2	1	1	1	1	1	1	1	1	1	1	1	1	1	1	1	1	1	1	1	1	1	1	1	1	1	1	1	1	1	1	1	1	1	1	1	1	1	1	1	1	1	1	1	1	1
OG0000323	HOG0000368	74	1	1	1	1	1	1	1	1	1	1	1	1	1	1	1	1	1	1	1	1	1	1	1	1	1	1	1	1	1	1	1	1	1	1	1	1	1	1	1	1	1	1	1	1	1	1	1
OG0000324	HOG0000369	74	1	2	1	1	1	1	1	1	1	1	1	1	1	1	1	1	1	1	1	1	1	1	1	1	1	1	1	1	1	1	1	1	1	1	1	1	1	1	1	1	1	1	1	1	1	1	1
OG0000325	HOG0000370	74	1	2	1	1	1	1	1	1	1	1	1	1	1	1	1	1	1	1	1	1	1	1	1	1	1	1	1	1	1	1	1	1	1	1	1	1	1	1	1	1	1	1	1	1	1	1	1
OG0000326	HOG0000371	74	1	2	1	1	1	1	1	1	1	1	1	1	1	1	1	1	1	1	1	1	1	1	1	1	1	1	1	1	1	1	1	1	1	1	1	1	1	1	1	1	1	1	1	1	1	1	1
OG0000327	HOG0000372	74	1	1	1	1	1	1	1	1	1	1	1	1	1	1	1	1	1	1	1	1	1	1	1	1	1	1	1	1	1	1	1	1	1	1	1	1	1	1	1	1	1	1	1	1	1	1	1
OG0000328	HOG0000373	74	1	2	1	2	1	1	1	1	1	1	1	1	1	1	1	1	1	1	1	1	1	1	1	1	1	1	1	1	1	1	1	1	1	1	1	1	1	1	1	1	1	1	1	1	1	1	1
OG0000329	HOG0000374	74	1	2	1	1	1	1	1	1	1	1	1	1	1	1	1	1	1	1	1	2	1	1	1	1	1	1	1	1	1	1	1	1	1	1	1	1	1	1	1	1	1	1	1	1	1	1	1
OG0000330	HOG0000375	74	1	2	1	1	1	1	1	1	1	1	1	1	1	1	1	1	1	1	1	1	1	1	1	1	1	1	1	1	1	1	1	1	1	1	1	1	1	1	1	1	1	1	1	1	1	1	1
OG0000331	HOG0000376	74	1	2	1	1	1	1	1	1	1	1	1	1	1	1	1	1	1	1	1	1	1	1	1	1	1	1	1	1	1	1	1	1	1	1	1	1	1	1	1	1	1	1	1	1	1	1	1
OG0000332	HOG0000377	74	1	1	1	1	1	1	1	1	1	1	1	1	1	1	1	1	1	1	1	1	1	1	1	1	1	1	1	1	1	1	1	1	1	1	1	1	1	1	1	1	1	1	1	1	1	1	1
OG0000333	HOG0000378	74	1	2	1	1	1	1	1	1	1	1	1	1	1	1	1	1	1	1	1	1	1	1	1	1	1	1	1	1	1	1	1	1	1	1	1	1	1	1	1	1	1	1	1	1	1	1	1
OG0000334	HOG0000379	74	1	2	1	1	1	1	1	1	1	1	1	1	1	1	1	1	1	1	1	1	1	1	1	1	1	2	1	1	1	1	1	1	1	1	1	1	1	1	1	1	1	1	1	1	1	1	1
OG0000335	HOG0000380	74	1	2	1	1	1	1	1	1	1	1	1	1	1	1	1	1	1	1	1	1	1	1	1	1	1	1	1	1	1	2	1	1	1	1	1	1	1	1	1	1	1	1	1	1	1	1	1
OG0000336	HOG0000381	74	1	1	1	1	1	1	1	1	1	1	1	1	1	1	1	1	1	1	1	1	1	1	1	1	1	1	1	1	1	1	1	1	1	1	1	1	1	1	1	1	1	1	1	1	1	1	1
OG0000337	HOG0000382	74	1	2	1	1	1	1	1	1	1	1	1	1	1	1	1	1	1	1	1	1	1	1	1	1	1	1	1	1	1	1	1	1	1	1	1	1	1	1	1	1	1	1	1	1	1	1	1
OG0000338	HOG0000383	73	1	2	1	1	1	1	1	1	1	1	1	1	1	1	1	1	1	1	1	1	1	1	1	1	1	1	1	1	1	1	1	1	1	1	1	1	0	1	1	1	1	1	1	2	1	1	1
OG0000339	HOG0000384	74	1	2	1	1	1	1	1	1	1	1	1	1	1	1	1	1	1	1	1	1	1	1	1	1	1	1	1	1	1	1	1	1	1	1	1	1	1	2	1	1	1	1	1	1	1	1	1
OG0000340	HOG0000385	73	1	2	1	1	1	1	1	1	1	1	1	1	1	1	1	1	1	1	1	1	1	1	1	1	1	1	1	1	1	2	1	1	1	1	2	1	0	1	1	1	1	1	1	1	1	1	1
OG0000341	HOG0000386	74	1	2	1	1	1	1	1	1	1	1	1	1	1	1	1	1	1	1	1	1	1	1	1	1	1	1	1	1	1	1	1	1	1	1	1	1	1	1	1	1	1	1	1	1	1	1	1
OG0000342	HOG0000387	74	1	2	1	2	1	1	1	1	1	1	1	1	1	1	1	1	1	1	1	1	1	1	1	1	1	1	1	1	1	1	1	1	1	1	1	1	1	1	1	1	1	1	1	1	1	1	1
OG0000343	HOG0000388	74	1	2	1	1	1	1	1	1	1	1	1	1	1	1	1	1	1	1	1	1	1	1	1	1	1	1	1	1	1	1	1	1	1	1	1	1	1	1	1	1	1	1	1	1	1	1	1
OG0000344	HOG0000389	74	1	2	1	1	1	1	1	1	1	1	1	1	1	1	1	1	1	1	1	1	1	1	1	1	1	1	1	1	1	1	1	1	1	1	1	1	1	1	1	1	1	1	1	1	1	1	1
OG0000345	HOG0000390	74	1	2	1	1	1	1	1	1	1	1	1	1	1	1	1	1	1	1	2	1	1	1	1	1	1	1	1	1	1	1	1	1	1	1	1	1	1	1	1	1	1	1	1	1	1	1	1
OG0000346	HOG0000391	74	1	2	1	1	1	1	1	1	1	1	1	1	1	1	1	1	1	1	1	1	1	1	1	1	1	1	1	1	1	1	1	1	1	1	1	1	1	1	1	1	1	1	1	1	1	1	1
OG0000347	HOG0000392	74	1	1	1	1	1	1	1	1	1	1	1	1	1	1	1	1	1	1	1	1	1	1	1	1	1	1	1	1	1	1	1	1	1	1	1	1	1	1	1	1	1	1	1	1	1	1	1
OG0000348	HOG0000393	74	1	2	1	1	1	1	1	1	1	1	1	1	1	1	1	1	1	1	1	1	1	1	1	1	1	1	1	1	1	1	1	1	1	1	1	1	1	1	1	1	1	1	1	1	1	1	1
OG0000349	HOG0000394	74	1	2	1	1	1	1	1	1	1	1	1	1	1	1	1	1	1	1	1	1	1	1	1	1	1	1	1	1	1	1	1	1	1	1	1	1	1	1	1	1	1	1	1	1	1	1	1
OG0000350	HOG0000395	74	1	2	1	1	1	1	1	1	1	1	1	1	1	1	1	1	1	1	1	1	1	1	1	1	1	1	1	1	1	1	1	1	1	1	1	1	1	1	1	1	1	1	1	1	1	1	1
OG0000351	HOG0000396	74	1	2	1	1	1	1	1	1	1	1	1	1	1	1	1	1	1	1	1	1	1	2	1	1	1	1	1	1	1	1	1	1	1	1	1	1	1	1	1	1	1	1	1	1	1	1	1
OG0000352	HOG0000397	74	1	1	1	1	1	1	1	1	1	1	1	1	1	1	1	1	1	1	1	1	1	1	1	1	1	1	1	1	1	1	1	1	1	1	1	1	1	1	1	1	1	1	1	1	1	1	1
OG0000353	HOG0000398	74	1	2	1	1	1	1	1	1	1	1	1	1	1	1	1	1	1	1	1	1	1	1	1	1	1	1	1	1	1	1	1	1	1	1	1	1	1	1	1	1	1	1	1	1	1	1	1
OG0000354	HOG0000399	74	1	1	1	1	1	1	1	1	1	1	1	1	1	1	1	1	1	1	1	1	1	1	1	1	1	1	1	1	1	1	1	1	1	1	1	1	1	1	1	1	1	1	1	1	1	1	1
OG0000355	HOG0000400	74	1	2	1	1	1	1	1	1	1	1	1	1	1	1	1	1	1	1	1	1	1	1	1	1	1	1	1	1	1	1	1	1	1	1	1	1	1	1	1	1	1	1	1	1	1	2	1
OG0000356	HOG0000401	74	1	2	1	1	1	1	1	1	1	1	1	1	1	1	1	1	1	1	1	1	1	1	1	1	1	1	1	1	1	2	1	1	1	1	1	1	1	1	1	1	1	1	1	1	1	1	1
OG0000357	HOG0000402	74	1	1	1	1	1	1	1	1	1	1	1	1	1	1	1	1	1	1	1	1	1	1	1	1	1	1	1	1	1	1	1	1	1	1	1	1	1	1	1	1	1	1	1	1	1	1	1
OG0000358	HOG0000403	74	1	1	1	1	1	1	1	1	1	1	1	1	1	1	1	1	1	1	1	1	1	1	1	1	1	1	1	1	1	1	1	1	1	1	1	1	1	1	1	1	1	1	1	1	1	1	1
OG0000359	HOG0000404	74	1	2	1	1	1	1	1	1	1	1	1	1	1	1	1	1	1	1	1	2	1	1	1	1	1	1	1	1	1	1	1	1	1	1	1	1	1	1	1	1	1	1	1	1	1	1	1
OG0000360	HOG0000405	74	1	1	1	1	1	1	1	1	1	1	1	1	1	1	1	1	1	1	1	1	1	1	1	1	1	1	1	1	1	1	1	1	1	1	1	1	1	1	1	1	1	1	1	1	1	1	1
OG0000361	HOG0000406	74	1	2	1	1	2	1	1	1	1	1	1	1	1	1	1	1	1	1	1	1	1	1	1	1	1	1	1	1	1	1	1	1	1	1	1	1	1	1	1	1	1	1	1	1	1	1	1
OG0000362	HOG0000407	74	1	1	1	1	1	1	1	1	1	1	1	1	1	1	1	1	1	1	1	1	1	1	1	1	1	1	1	1	1	1	1	1	1	1	1	1	1	1	1	1	1	1	1	1	1	1	1
OG0000363	HOG0000408	74	1	2	1	1	1	1	1	1	1	1	1	1	1	1	1	1	1	1	1	1	1	1	1	1	1	1	1	1	1	1	1	1	1	1	1	1	1	1	1	1	1	1	1	1	1	1	1
OG0000364	HOG0000409	74	1	2	1	1	1	1	1	1	1	1	1	1	1	1	1	1	1	1	1	1	1	1	1	1	1	1	1	1	1	1	1	1	1	1	1	1	1	1	1	2	1	1	1	1	1	1	1
OG0000365	HOG0000410	74	1	2	1	1	1	1	1	1	1	1	1	1	1	1	1	1	1	1	1	1	1	1	1	1	1	1	1	1	1	1	1	1	1	1	1	1	2	1	1	1	1	1	1	1	1	1	1
OG0000366	HOG0000411	74	1	2	1	1	1	1	1	1	1	1	1	1	1	1	1	1	1	1	1	1	1	1	1	1	1	1	1	1	1	1	1	1	1	1	1	1	2	1	1	1	1	1	1	1	1	1	1
OG0000367	HOG0000412	74	1	2	1	1	1	1	1	1	1	1	1	1	2	1	1	1	1	1	1	1	1	1	1	1	1	1	1	1	1	1	1	1	1	1	1	1	1	1	1	1	1	1	1	1	1	1	1
OG0000368	HOG0000413	74	1	2	1	1	1	1	1	1	1	1	1	1	1	1	1	1	1	1	1	1	1	1	1	1	1	1	1	1	1	1	1	1	1	1	1	1	1	1	1	1	1	1	1	1	1	1	1
OG0000369	HOG0000414	74	1	2	1	1	1	1	1	1	1	1	1	1	1	1	1	1	1	1	1	1	2	1	1	1	1	1	1	1	1	1	1	1	1	1	1	1	1	1	1	1	1	1	1	1	1	1	1
OG0000370	HOG0000415	74	1	1	1	1	1	1	1	1	1	1	1	1	1	1	1	1	1	1	1	1	1	1	1	1	1	1	1	1	1	1	1	1	1	1	1	1	1	1	1	1	1	1	1	1	1	1	1
OG0000371	HOG0000416	74	1	2	1	1	1	1	1	1	1	1	1	1	1	1	1	1	1	1	1	1	1	1	1	1	1	1	1	1	1	1	1	1	1	1	1	1	1	1	1	1	1	1	2	1	1	1	1
OG0000372	HOG0000417	74	1	2	1	1	1	1	1	1	1	1	1	1	1	1	1	1	1	1	1	1	1	1	1	1	1	1	1	1	1	1	1	1	1	1	1	1	1	1	1	1	1	1	1	1	1	1	1
OG0000373	HOG0000418	74	1	2	1	1	1	1	1	1	1	1	1	1	1	1	1	1	1	1	1	1	1	1	1	1	1	1	1	1	1	1	1	1	1	1	1	1	1	1	1	1	1	1	1	1	1	1	1
OG0000374	HOG0000419	74	1	2	1	1	1	1	1	1	1	1	1	1	1	1	1	1	1	1	1	1	1	1	1	1	1	1	1	1	1	1	1	1	1	1	1	1	1	1	1	1	1	1	1	1	1	1	1
OG0000375	HOG0000420	74	1	2	1	1	1	1	1	1	1	1	1	1	1	1	1	1	1	1	1	1	1	1	1	1	1	1	1	1	1	1	1	1	1	1	1	1	1	1	1	1	1	1	1	1	1	1	1
OG0000376	HOG0000421	74	1	2	1	1	1	1	1	1	1	1	1	1	1	1	1	1	1	1	1	1	1	1	1	1	1	1	1	1	1	1	1	1	1	1	1	1	1	1	1	1	1	1	1	1	1	1	1
OG0000377	HOG0000422	74	1	2	1	1	1	1	1	1	1	1	1	1	1	1	1	1	1	1	1	1	1	1	1	1	1	1	1	1	1	2	1	1	1	1	1	1	1	1	1	1	1	1	1	1	1	1	1
OG0000378	HOG0000423	74	1	2	1	1	1	1	1	1	1	1	1	1	1	1	1	1	1	1	1	1	1	1	1	1	1	1	1	1	1	2	1	1	1	1	1	1	1	1	1	1	1	1	1	1	1	1	1
OG0000379	HOG0000424	74	1	2	1	1	1	1	1	1	1	1	1	1	1	1	1	1	1	1	1	1	2	1	1	1	1	1	1	1	1	1	1	1	1	1	1	1	1	1	1	1	1	1	1	1	1	1	1
OG0000380	HOG0000425	74	1	2	1	1	1	1	1	1	1	1	1	1	2	1	1	1	1	1	1	1	1	1	1	1	1	1	1	1	1	1	1	1	1	1	1	1	1	1	1	1	1	1	1	1	1	1	1
OG0000381	HOG0000426	74	1	2	1	1	1	1	1	1	1	1	1	1	1	1	1	1	1	1	1	1	1	1	1	1	1	1	1	1	1	1	1	1	1	1	1	1	1	1	1	1	1	1	1	1	1	1	1
OG0000382	HOG0000427	74	1	2	1	1	1	1	1	1	1	1	1	1	1	1	1	1	1	1	1	1	1	1	1	1	1	1	1	1	1	1	1	1	1	1	1	1	1	1	1	1	1	1	1	1	1	1	1
OG0000383	HOG0000428	74	1	1	1	1	1	1	1	1	1	1	1	1	1	1	1	1	1	1	1	1	1	1	1	1	1	1	1	1	1	1	1	1	1	1	1	1	1	1	1	1	1	1	1	1	1	1	1
OG0000384	HOG0000429	74	1	2	1	2	1	1	1	1	1	1	1	1	1	1	1	1	1	1	1	1	1	1	1	1	1	1	1	1	1	1	1	1	1	1	1	1	1	1	1	1	1	1	1	1	1	1	1
OG0000385	HOG0000430	74	1	2	1	1	1	1	1	1	1	1	1	1	1	1	1	1	1	1	1	1	1	1	1	1	1	1	1	1	1	1	1	1	1	1	2	1	1	1	1	1	1	1	1	1	1	1	1
OG0000386	HOG0000431	74	1	2	1	1	1	1	1	1	1	1	1	1	1	1	1	1	1	1	1	1	1	1	1	1	1	1	1	1	1	1	1	1	1	1	1	2	1	1	1	1	1	1	1	1	1	1	1
OG0000387	HOG0000432	74	1	2	1	1	1	1	1	1	1	1	1	1	1	1	1	1	1	1	1	1	1	1	1	1	1	1	1	1	1	2	1	1	1	1	1	1	1	1	1	1	1	1	1	1	1	1	1
OG0000388	HOG0000433	74	1	2	1	1	1	1	1	1	1	1	1	1	1	1	1	1	1	1	1	1	1	1	1	1	1	1	1	1	1	1	1	1	1	1	1	1	1	1	1	1	1	1	1	1	1	1	1
OG0000389	HOG0000434	74	1	2	1	1	1	1	1	1	1	1	1	1	1	1	1	1	1	1	1	1	1	1	1	1	1	1	1	2	1	1	1	1	1	1	1	1	1	1	1	1	1	1	1	1	1	1	1
OG0000390	HOG0000435	74	1	2	1	1	1	1	1	1	1	1	1	1	1	1	1	1	1	1	1	1	1	1	1	1	1	1	1	1	1	1	1	1	1	1	1	1	1	1	1	1	1	1	1	1	1	1	1
OG0000391	HOG0000436	74	1	2	1	1	1	1	1	1	1	1	1	1	1	1	1	1	1	1	1	1	1	1	1	1	1	1	1	1	1	1	1	1	1	1	1	1	1	1	1	1	2	1	1	1	1	1	1
OG0000392	HOG0000437	74	1	2	1	1	1	1	1	1	1	1	1	1	1	1	1	1	1	1	1	1	1	1	1	1	1	1	1	1	1	1	1	1	1	1	1	1	1	1	1	1	1	1	1	1	1	1	1
OG0000393	HOG0000438	74	1	2	1	1	1	1	1	1	1	1	1	1	1	1	1	1	1	1	1	1	1	1	1	1	1	1	1	1	1	1	1	1	1	1	1	1	2	1	1	1	1	1	1	1	1	1	1
OG0000394	HOG0000439	74	1	2	1	1	1	1	1	1	1	1	1	1	1	1	1	1	1	1	1	1	1	1	1	1	1	1	1	1	1	1	1	1	1	1	1	1	2	1	1	1	1	1	1	1	1	1	1
OG0000395	HOG0000440	74	1	2	1	1	1	1	1	1	1	1	1	1	1	1	1	1	1	1	1	1	1	1	1	1	1	1	1	1	1	1	1	1	1	1	1	1	1	1	1	1	1	1	1	1	1	1	1
OG0000396	HOG0000441	74	1	2	1	1	1	1	1	1	1	1	1	1	1	1	1	1	1	1	1	1	1	1	1	1	1	1	1	1	1	1	1	1	1	1	1	2	1	1	1	1	1	1	1	1	1	1	1
OG0000397	HOG0000442	74	1	2	1	1	1	1	1	1	1	1	1	1	1	1	1	1	1	1	1	1	1	1	1	1	1	1	1	2	1	1	1	1	1	1	1	1	1	1	1	1	1	1	1	1	1	1	1
OG0000398	HOG0000443	74	1	1	1	1	1	1	1	1	1	1	1	1	1	1	1	1	1	1	1	1	1	1	1	1	1	1	1	1	1	1	1	1	1	1	1	1	1	1	1	1	1	1	1	1	1	1	1
OG0000399	HOG0000444	74	1	1	1	1	1	1	1	1	1	1	1	1	1	1	1	1	1	1	1	1	1	1	1	1	1	1	1	1	1	1	1	1	1	1	1	1	1	1	1	1	1	1	1	1	1	1	1
OG0000400	HOG0000445	74	1	1	1	1	1	1	1	1	1	1	1	1	1	1	1	1	1	1	1	1	1	1	1	1	1	1	1	1	1	1	1	1	1	1	1	1	1	1	1	1	1	1	1	1	1	1	1
OG0000401	HOG0000446	74	1	1	1	1	1	1	1	1	1	1	1	1	1	1	1	1	1	1	1	1	1	1	1	1	1	1	1	1	1	1	1	1	1	1	1	1	1	1	1	1	1	1	1	1	1	1	1
OG0000402	HOG0000447	74	1	1	1	1	1	1	1	1	1	1	1	1	1	1	1	1	1	1	1	1	1	1	1	1	1	1	1	1	1	1	1	1	1	1	1	1	1	1	1	1	1	1	1	1	1	1	1
OG0000403	HOG0000448	74	1	1	1	1	1	1	1	1	1	1	1	1	1	1	1	1	1	1	1	1	1	1	1	1	1	1	1	1	1	1	1	1	1	1	1	1	1	1	1	1	1	1	1	1	1	1	1
OG0000404	HOG0000449	74	1	1	1	1	1	1	1	1	1	1	1	1	1	1	1	1	1	1	1	1	1	1	1	1	1	1	1	1	1	1	1	1	1	1	1	1	1	1	1	1	1	1	1	1	1	1	1
OG0000405	HOG0000450	74	1	1	1	1	1	1	1	1	1	1	1	1	1	1	1	1	1	1	1	1	1	1	1	1	1	1	1	1	1	1	1	1	1	1	1	1	1	1	1	1	1	1	1	1	1	1	1
OG0000406	HOG0000451	74	1	1	1	1	1	1	1	1	1	1	1	1	1	1	1	1	1	1	1	1	1	1	1	1	1	1	1	1	1	1	1	1	1	1	1	1	1	1	1	1	1	1	1	1	1	1	1
OG0000407	HOG0000452	74	1	1	1	1	1	1	1	1	1	1	1	1	1	1	1	1	1	1	1	1	1	1	1	1	1	1	1	1	1	1	1	1	1	1	1	1	1	1	1	1	1	1	1	1	1	1	1
OG0000408	HOG0000453	74	1	1	1	1	1	1	1	1	1	1	1	1	1	1	1	1	1	1	1	1	1	1	1	1	1	1	1	1	1	1	1	1	1	1	1	1	1	1	1	1	1	1	1	1	1	1	1
OG0000409	HOG0000454	74	1	1	1	1	1	1	1	1	1	1	1	1	1	1	1	1	1	1	1	1	1	1	1	1	1	1	1	1	1	1	1	1	1	1	1	1	1	1	1	1	1	1	1	1	1	1	1
OG0000410	HOG0000455	74	1	1	1	1	1	1	1	1	1	1	1	1	1	1	1	1	1	1	1	1	1	1	1	1	1	1	1	1	1	1	1	1	1	1	1	1	1	1	1	1	1	1	1	1	1	1	1
OG0000411	HOG0000456	74	1	1	1	1	1	1	1	1	1	1	1	1	1	1	1	1	1	1	1	1	1	1	1	1	1	1	1	1	1	1	1	1	1	1	1	1	1	1	1	1	1	1	1	1	1	1	1
OG0000412	HOG0000457	74	1	1	1	1	1	1	1	1	1	1	1	1	1	1	1	1	1	1	1	1	1	1	1	1	1	1	1	1	1	1	1	1	1	1	1	1	1	1	1	1	1	1	1	1	1	1	1
OG0000413	HOG0000458	74	1	1	1	1	1	1	1	1	1	1	1	1	1	1	1	1	1	1	1	1	1	1	1	1	1	1	1	1	1	1	1	1	1	1	1	1	1	1	1	1	1	1	1	1	1	1	1
OG0000414	HOG0000459	74	1	1	1	1	1	1	1	1	1	1	1	1	1	1	1	1	1	1	1	1	1	1	1	1	1	1	1	1	1	1	1	1	1	1	1	1	1	1	1	1	1	1	1	1	1	1	1
OG0000415	HOG0000460	74	1	1	1	1	1	1	1	1	1	1	1	1	1	1	1	1	1	1	1	1	1	1	1	1	1	1	1	1	1	1	1	1	1	1	1	1	1	1	1	1	1	1	1	1	1	1	1
OG0000416	HOG0000461	74	1	1	1	1	1	1	1	1	1	1	1	1	1	1	1	1	1	1	1	1	1	1	1	1	1	1	1	1	1	1	1	1	1	1	1	1	1	1	1	1	1	1	1	1	1	1	1
OG0000417	HOG0000462	74	1	1	1	1	1	1	1	1	1	1	1	1	1	1	1	1	1	1	1	1	1	1	1	1	1	1	1	1	1	1	1	1	1	1	1	1	1	1	1	1	1	1	1	1	1	1	1
OG0000418	HOG0000463	74	1	1	1	1	1	1	1	1	1	1	1	1	1	1	1	1	1	1	1	1	1	1	1	1	1	1	1	1	1	1	1	1	1	1	1	1	1	1	1	1	1	1	1	1	1	1	1
OG0000419	HOG0000464	74	1	1	1	1	1	1	1	1	1	1	1	1	1	1	1	1	1	1	1	1	1	1	1	1	1	1	1	1	1	1	1	1	1	1	1	1	1	1	1	1	1	1	1	1	1	1	1
OG0000420	HOG0000465	74	1	1	1	1	1	1	1	1	1	1	1	1	1	1	1	1	1	1	1	1	1	1	1	1	1	1	1	1	1	1	1	1	1	1	1	1	1	1	1	1	1	1	1	1	1	1	1
OG0000421	HOG0000466	74	1	1	1	1	1	1	1	1	1	1	1	1	1	1	1	1	1	1	1	1	1	1	1	1	1	1	1	1	1	1	1	1	1	1	1	1	1	1	1	1	1	1	1	1	1	1	1
OG0000422	HOG0000467	74	1	1	1	1	1	1	1	1	1	1	1	1	1	1	1	1	1	1	1	1	1	1	1	1	1	1	1	1	1	1	1	1	1	1	1	1	1	1	1	1	1	1	1	1	1	1	1
OG0000423	HOG0000468	74	1	1	1	1	1	1	1	1	1	1	1	1	1	1	1	1	1	1	1	1	1	1	1	1	1	1	1	1	1	1	1	1	1	1	1	1	1	1	1	1	1	1	1	1	1	1	1
OG0000424	HOG0000469	74	1	1	1	1	1	1	1	1	1	1	1	1	1	1	1	1	1	1	1	1	1	1	1	1	1	1	1	1	1	1	1	1	1	1	1	1	1	1	1	1	1	1	1	1	1	1	1
OG0000425	HOG0000470	74	1	1	1	1	1	1	1	1	1	1	1	1	1	1	1	1	1	1	1	1	1	1	1	1	1	1	1	1	1	1	1	1	1	1	1	1	1	1	1	1	1	1	1	1	1	1	1
OG0000426	HOG0000471	74	1	1	1	1	1	1	1	1	1	1	1	1	1	1	1	1	1	1	1	1	1	1	1	1	1	1	1	1	1	1	1	1	1	1	1	1	1	1	1	1	1	1	1	1	1	1	1
OG0000427	HOG0000472	74	1	1	1	1	1	1	1	1	1	1	1	1	1	1	1	1	1	1	1	1	1	1	1	1	1	1	1	1	1	1	1	1	1	1	1	1	1	1	1	1	1	1	1	1	1	1	1
OG0000428	HOG0000473	74	1	1	1	1	1	1	1	1	1	1	1	1	1	1	1	1	1	1	1	1	1	1	1	1	1	1	1	1	1	1	1	1	1	1	1	1	1	1	1	1	1	1	1	1	1	1	1
OG0000429	HOG0000474	74	1	1	1	1	1	1	1	1	1	1	1	1	1	1	1	1	1	1	1	1	1	1	1	1	1	1	1	1	1	1	1	1	1	1	1	1	1	1	1	1	1	1	1	1	1	1	1
OG0000430	HOG0000475	74	1	1	1	1	1	1	1	1	1	1	1	1	1	1	1	1	1	1	1	1	1	1	1	1	1	1	1	1	1	1	1	1	1	1	1	1	1	1	1	1	1	1	1	1	1	1	1
OG0000431	HOG0000476	74	1	1	1	1	1	1	1	1	1	1	1	1	1	1	1	1	1	1	1	1	1	1	1	1	1	1	1	1	1	1	1	1	1	1	1	1	1	1	1	1	1	1	1	1	1	1	1
OG0000432	HOG0000477	74	1	1	1	1	1	1	1	1	1	1	1	1	1	1	1	1	1	1	1	1	1	1	1	1	1	1	1	1	1	1	1	1	1	1	1	1	1	1	1	1	1	1	1	1	1	1	1
OG0000433	HOG0000478	74	1	1	1	1	1	1	1	1	1	1	1	1	1	1	1	1	1	1	1	1	1	1	1	1	1	1	1	1	1	1	1	1	1	1	1	1	1	1	1	1	1	1	1	1	1	1	1
OG0000434	HOG0000479	74	1	1	1	1	1	1	1	1	1	1	1	1	1	1	1	1	1	1	1	1	1	1	1	1	1	1	1	1	1	1	1	1	1	1	1	1	1	1	1	1	1	1	1	1	1	1	1
OG0000435	HOG0000480	74	1	1	1	1	1	1	1	1	1	1	1	1	1	1	1	1	1	1	1	1	1	1	1	1	1	1	1	1	1	1	1	1	1	1	1	1	1	1	1	1	1	1	1	1	1	1	1
OG0000436	HOG0000481	74	1	1	1	1	1	1	1	1	1	1	1	1	1	1	1	1	1	1	1	1	1	1	1	1	1	1	1	1	1	1	1	1	1	1	1	1	1	1	1	1	1	1	1	1	1	1	1
OG0000437	HOG0000482	74	1	1	1	1	1	1	1	1	1	1	1	1	1	1	1	1	1	1	1	1	1	1	1	1	1	1	1	1	1	1	1	1	1	1	1	1	1	1	1	1	1	1	1	1	1	1	1
OG0000438	HOG0000483	74	1	1	1	1	1	1	1	1	1	1	1	1	1	1	1	1	1	1	1	1	1	1	1	1	1	1	1	1	1	1	1	1	1	1	1	1	1	1	1	1	1	1	1	1	1	1	1
OG0000439	HOG0000484	74	1	1	1	1	1	1	1	1	1	1	1	1	1	1	1	1	1	1	1	1	1	1	1	1	1	1	1	1	1	1	1	1	1	1	1	1	1	1	1	1	1	1	1	1	1	1	1
OG0000440	HOG0000485	74	1	1	1	1	1	1	1	1	1	1	1	1	1	1	1	1	1	1	1	1	1	1	1	1	1	1	1	1	1	1	1	1	1	1	1	1	1	1	1	1	1	1	1	1	1	1	1
OG0000441	HOG0000486	74	1	1	1	1	1	1	1	1	1	1	1	1	1	1	1	1	1	1	1	1	1	1	1	1	1	1	1	1	1	1	1	1	1	1	1	1	1	1	1	1	1	1	1	1	1	1	1
OG0000442	HOG0000487	74	1	1	1	1	1	1	1	1	1	1	1	1	1	1	1	1	1	1	1	1	1	1	1	1	1	1	1	1	1	1	1	1	1	1	1	1	1	1	1	1	1	1	1	1	1	1	1
OG0000443	HOG0000488	74	1	1	1	1	1	1	1	1	1	1	1	1	1	1	1	1	1	1	1	1	1	1	1	1	1	1	1	1	1	1	1	1	1	1	1	1	1	1	1	1	1	1	1	1	1	1	1
OG0000444	HOG0000489	74	1	1	1	1	1	1	1	1	1	1	1	1	1	1	1	1	1	1	1	1	1	1	1	1	1	1	1	1	1	1	1	1	1	1	1	1	1	1	1	1	1	1	1	1	1	1	1
OG0000445	HOG0000490	74	1	1	1	1	1	1	1	1	1	1	1	1	1	1	1	1	1	1	1	1	1	1	1	1	1	1	1	1	1	1	1	1	1	1	1	1	1	1	1	1	1	1	1	1	1	1	1
OG0000446	HOG0000491	74	1	1	1	1	1	1	1	1	1	1	1	1	1	1	1	1	1	1	1	1	1	1	1	1	1	1	1	1	1	1	1	1	1	1	1	1	1	1	1	1	1	1	1	1	1	1	1
OG0000447	HOG0000492	74	1	1	1	1	1	1	1	1	1	1	1	1	1	1	1	1	1	1	1	1	1	1	1	1	1	1	1	1	1	1	1	1	1	1	1	1	1	1	1	1	1	1	1	1	1	1	1
OG0000448	HOG0000493	74	1	1	1	1	1	1	1	1	1	1	1	1	1	1	1	1	1	1	1	1	1	1	1	1	1	1	1	1	1	1	1	1	1	1	1	1	1	1	1	1	1	1	1	1	1	1	1
OG0000449	HOG0000494	74	1	1	1	1	1	1	1	1	1	1	1	1	1	1	1	1	1	1	1	1	1	1	1	1	1	1	1	1	1	1	1	1	1	1	1	1	1	1	1	1	1	1	1	1	1	1	1
OG0000450	HOG0000495	74	1	1	1	1	1	1	1	1	1	1	1	1	1	1	1	1	1	1	1	1	1	1	1	1	1	1	1	1	1	1	1	1	1	1	1	1	1	1	1	1	1	1	1	1	1	1	1
OG0000451	HOG0000496	74	1	1	1	1	1	1	1	1	1	1	1	1	1	1	1	1	1	1	1	1	1	1	1	1	1	1	1	1	1	1	1	1	1	1	1	1	1	1	1	1	1	1	1	1	1	1	1
OG0000452	HOG0000497	74	1	1	1	1	1	1	1	1	1	1	1	1	1	1	1	1	1	1	1	1	1	1	1	1	1	1	1	1	1	1	1	1	1	1	1	1	1	1	1	1	1	1	1	1	1	1	1
OG0000453	HOG0000498	74	1	1	1	1	1	1	1	1	1	1	1	1	1	1	1	1	1	1	1	1	1	1	1	1	1	1	1	1	1	1	1	1	1	1	1	1	1	1	1	1	1	1	1	1	1	1	1
OG0000454	HOG0000499	74	1	1	1	1	1	1	1	1	1	1	1	1	1	1	1	1	1	1	1	1	1	1	1	1	1	1	1	1	1	1	1	1	1	1	1	1	1	1	1	1	1	1	1	1	1	1	1
OG0000455	HOG0000500	74	1	1	1	1	1	1	1	1	1	1	1	1	1	1	1	1	1	1	1	1	1	1	1	1	1	1	1	1	1	1	1	1	1	1	1	1	1	1	1	1	1	1	1	1	1	1	1
OG0000456	HOG0000501	74	1	1	1	1	1	1	1	1	1	1	1	1	1	1	1	1	1	1	1	1	1	1	1	1	1	1	1	1	1	1	1	1	1	1	1	1	1	1	1	1	1	1	1	1	1	1	1
OG0000457	HOG0000502	74	1	1	1	1	1	1	1	1	1	1	1	1	1	1	1	1	1	1	1	1	1	1	1	1	1	1	1	1	1	1	1	1	1	1	1	1	1	1	1	1	1	1	1	1	1	1	1
OG0000458	HOG0000503	74	1	1	1	1	1	1	1	1	1	1	1	1	1	1	1	1	1	1	1	1	1	1	1	1	1	1	1	1	1	1	1	1	1	1	1	1	1	1	1	1	1	1	1	1	1	1	1
OG0000459	HOG0000504	74	1	1	1	1	1	1	1	1	1	1	1	1	1	1	1	1	1	1	1	1	1	1	1	1	1	1	1	1	1	1	1	1	1	1	1	1	1	1	1	1	1	1	1	1	1	1	1
OG0000460	HOG0000505	74	1	1	1	1	1	1	1	1	1	1	1	1	1	1	1	1	1	1	1	1	1	1	1	1	1	1	1	1	1	1	1	1	1	1	1	1	1	1	1	1	1	1	1	1	1	1	1
OG0000461	HOG0000506	74	1	1	1	1	1	1	1	1	1	1	1	1	1	1	1	1	1	1	1	1	1	1	1	1	1	1	1	1	1	1	1	1	1	1	1	1	1	1	1	1	1	1	1	1	1	1	1
OG0000462	HOG0000507	74	1	1	1	1	1	1	1	1	1	1	1	1	1	1	1	1	1	1	1	1	1	1	1	1	1	1	1	1	1	1	1	1	1	1	1	1	1	1	1	1	1	1	1	1	1	1	1
OG0000463	HOG0000508	74	1	1	1	1	1	1	1	1	1	1	1	1	1	1	1	1	1	1	1	1	1	1	1	1	1	1	1	1	1	1	1	1	1	1	1	1	1	1	1	1	1	1	1	1	1	1	1
OG0000464	HOG0000509	74	1	1	1	1	1	1	1	1	1	1	1	1	1	1	1	1	1	1	1	1	1	1	1	1	1	1	1	1	1	1	1	1	1	1	1	1	1	1	1	1	1	1	1	1	1	1	1
OG0000465	HOG0000510	74	1	1	1	1	1	1	1	1	1	1	1	1	1	1	1	1	1	1	1	1	1	1	1	1	1	1	1	1	1	1	1	1	1	1	1	1	1	1	1	1	1	1	1	1	1	1	1
OG0000466	HOG0000511	74	1	1	1	1	1	1	1	1	1	1	1	1	1	1	1	1	1	1	1	1	1	1	1	1	1	1	1	1	1	1	1	1	1	1	1	1	1	1	1	1	1	1	1	1	1	1	1
OG0000467	HOG0000512	74	1	1	1	1	1	1	1	1	1	1	1	1	1	1	1	1	1	1	1	1	1	1	1	1	1	1	1	1	1	1	1	1	1	1	1	1	1	1	1	1	1	1	1	1	1	1	1
OG0000468	HOG0000513	74	1	1	1	1	1	1	1	1	1	1	1	1	1	1	1	1	1	1	1	1	1	1	1	1	1	1	1	1	1	1	1	1	1	1	1	1	1	1	1	1	1	1	1	1	1	1	1
OG0000469	HOG0000514	74	1	1	1	1	1	1	1	1	1	1	1	1	1	1	1	1	1	1	1	1	1	1	1	1	1	1	1	1	1	1	1	1	1	1	1	1	1	1	1	1	1	1	1	1	1	1	1
OG0000470	HOG0000515	74	1	1	1	1	1	1	1	1	1	1	1	1	1	1	1	1	1	1	1	1	1	1	1	1	1	1	1	1	1	1	1	1	1	1	1	1	1	1	1	1	1	1	1	1	1	1	1
OG0000471	HOG0000516	74	1	1	1	1	1	1	1	1	1	1	1	1	1	1	1	1	1	1	1	1	1	1	1	1	1	1	1	1	1	1	1	1	1	1	1	1	1	1	1	1	1	1	1	1	1	1	1
OG0000472	HOG0000517	74	1	1	1	1	1	1	1	1	1	1	1	1	1	1	1	1	1	1	1	1	1	1	1	1	1	1	1	1	1	1	1	1	1	1	1	1	1	1	1	1	1	1	1	1	1	1	1
OG0000473	HOG0000518	74	1	1	1	1	1	1	1	1	1	1	1	1	1	1	1	1	1	1	1	1	1	1	1	1	1	1	1	1	1	1	1	1	1	1	1	1	1	1	1	1	1	1	1	1	1	1	1
OG0000474	HOG0000519	74	1	1	1	1	1	1	1	1	1	1	1	1	1	1	1	1	1	1	1	1	1	1	1	1	1	1	1	1	1	1	1	1	1	1	1	1	1	1	1	1	1	1	1	1	1	1	1
OG0000475	HOG0000520	74	1	1	1	1	1	1	1	1	1	1	1	1	1	1	1	1	1	1	1	1	1	1	1	1	1	1	1	1	1	1	1	1	1	1	1	1	1	1	1	1	1	1	1	1	1	1	1
OG0000476	HOG0000521	74	1	1	1	1	1	1	1	1	1	1	1	1	1	1	1	1	1	1	1	1	1	1	1	1	1	1	1	1	1	1	1	1	1	1	1	1	1	1	1	1	1	1	1	1	1	1	1
OG0000477	HOG0000522	74	1	1	1	1	1	1	1	1	1	1	1	1	1	1	1	1	1	1	1	1	1	1	1	1	1	1	1	1	1	1	1	1	1	1	1	1	1	1	1	1	1	1	1	1	1	1	1
OG0000478	HOG0000523	74	1	1	1	1	1	1	1	1	1	1	1	1	1	1	1	1	1	1	1	1	1	1	1	1	1	1	1	1	1	1	1	1	1	1	1	1	1	1	1	1	1	1	1	1	1	1	1
OG0000479	HOG0000524	74	1	1	1	1	1	1	1	1	1	1	1	1	1	1	1	1	1	1	1	1	1	1	1	1	1	1	1	1	1	1	1	1	1	1	1	1	1	1	1	1	1	1	1	1	1	1	1
OG0000480	HOG0000525	74	1	1	1	1	1	1	1	1	1	1	1	1	1	1	1	1	1	1	1	1	1	1	1	1	1	1	1	1	1	1	1	1	1	1	1	1	1	1	1	1	1	1	1	1	1	1	1
OG0000481	HOG0000526	74	1	1	1	1	1	1	1	1	1	1	1	1	1	1	1	1	1	1	1	1	1	1	1	1	1	1	1	1	1	1	1	1	1	1	1	1	1	1	1	1	1	1	1	1	1	1	1
OG0000482	HOG0000527	74	1	1	1	1	1	1	1	1	1	1	1	1	1	1	1	1	1	1	1	1	1	1	1	1	1	1	1	1	1	1	1	1	1	1	1	1	1	1	1	1	1	1	1	1	1	1	1
OG0000483	HOG0000528	74	1	1	1	1	1	1	1	1	1	1	1	1	1	1	1	1	1	1	1	1	1	1	1	1	1	1	1	1	1	1	1	1	1	1	1	1	1	1	1	1	1	1	1	1	1	1	1
OG0000484	HOG0000529	74	1	1	1	1	1	1	1	1	1	1	1	1	1	1	1	1	1	1	1	1	1	1	1	1	1	1	1	1	1	1	1	1	1	1	1	1	1	1	1	1	1	1	1	1	1	1	1
OG0000485	HOG0000530	74	1	1	1	1	1	1	1	1	1	1	1	1	1	1	1	1	1	1	1	1	1	1	1	1	1	1	1	1	1	1	1	1	1	1	1	1	1	1	1	1	1	1	1	1	1	1	1
OG0000486	HOG0000531	74	1	1	1	1	1	1	1	1	1	1	1	1	1	1	1	1	1	1	1	1	1	1	1	1	1	1	1	1	1	1	1	1	1	1	1	1	1	1	1	1	1	1	1	1	1	1	1
OG0000487	HOG0000532	74	1	1	1	1	1	1	1	1	1	1	1	1	1	1	1	1	1	1	1	1	1	1	1	1	1	1	1	1	1	1	1	1	1	1	1	1	1	1	1	1	1	1	1	1	1	1	1
OG0000488	HOG0000533	74	1	1	1	1	1	1	1	1	1	1	1	1	1	1	1	1	1	1	1	1	1	1	1	1	1	1	1	1	1	1	1	1	1	1	1	1	1	1	1	1	1	1	1	1	1	1	1
OG0000489	HOG0000534	74	1	1	1	1	1	1	1	1	1	1	1	1	1	1	1	1	1	1	1	1	1	1	1	1	1	1	1	1	1	1	1	1	1	1	1	1	1	1	1	1	1	1	1	1	1	1	1
OG0000490	HOG0000535	74	1	1	1	1	1	1	1	1	1	1	1	1	1	1	1	1	1	1	1	1	1	1	1	1	1	1	1	1	1	1	1	1	1	1	1	1	1	1	1	1	1	1	1	1	1	1	1
OG0000491	HOG0000536	74	1	1	1	1	1	1	1	1	1	1	1	1	1	1	1	1	1	1	1	1	1	1	1	1	1	1	1	1	1	1	1	1	1	1	1	1	1	1	1	1	1	1	1	1	1	1	1
OG0000492	HOG0000537	74	1	1	1	1	1	1	1	1	1	1	1	1	1	1	1	1	1	1	1	1	1	1	1	1	1	1	1	1	1	1	1	1	1	1	1	1	1	1	1	1	1	1	1	1	1	1	1
OG0000493	HOG0000538	74	1	1	1	1	1	1	1	1	1	1	1	1	1	1	1	1	1	1	1	1	1	1	1	1	1	1	1	1	1	1	1	1	1	1	1	1	1	1	1	1	1	1	1	1	1	1	1
OG0000494	HOG0000539	74	1	1	1	1	1	1	1	1	1	1	1	1	1	1	1	1	1	1	1	1	1	1	1	1	1	1	1	1	1	1	1	1	1	1	1	1	1	1	1	1	1	1	1	1	1	1	1
OG0000495	HOG0000540	74	1	1	1	1	1	1	1	1	1	1	1	1	1	1	1	1	1	1	1	1	1	1	1	1	1	1	1	1	1	1	1	1	1	1	1	1	1	1	1	1	1	1	1	1	1	1	1
OG0000496	HOG0000541	74	1	1	1	1	1	1	1	1	1	1	1	1	1	1	1	1	1	1	1	1	1	1	1	1	1	1	1	1	1	1	1	1	1	1	1	1	1	1	1	1	1	1	1	1	1	1	1
OG0000497	HOG0000542	74	1	1	1	1	1	1	1	1	1	1	1	1	1	1	1	1	1	1	1	1	1	1	1	1	1	1	1	1	1	1	1	1	1	1	1	1	1	1	1	1	1	1	1	1	1	1	1
OG0000498	HOG0000543	74	1	1	1	1	1	1	1	1	1	1	1	1	1	1	1	1	1	1	1	1	1	1	1	1	1	1	1	1	1	1	1	1	1	1	1	1	1	1	1	1	1	1	1	1	1	1	1
OG0000499	HOG0000544	74	1	1	1	1	1	1	1	1	1	1	1	1	1	1	1	1	1	1	1	1	1	1	1	1	1	1	1	1	1	1	1	1	1	1	1	1	1	1	1	1	1	1	1	1	1	1	1
OG0000500	HOG0000545	74	1	1	1	1	1	1	1	1	1	1	1	1	1	1	1	1	1	1	1	1	1	1	1	1	1	1	1	1	1	1	1	1	1	1	1	1	1	1	1	1	1	1	1	1	1	1	1
OG0000501	HOG0000546	74	1	1	1	1	1	1	1	1	1	1	1	1	1	1	1	1	1	1	1	1	1	1	1	1	1	1	1	1	1	1	1	1	1	1	1	1	1	1	1	1	1	1	1	1	1	1	1
OG0000502	HOG0000547	74	1	1	1	1	1	1	1	1	1	1	1	1	1	1	1	1	1	1	1	1	1	1	1	1	1	1	1	1	1	1	1	1	1	1	1	1	1	1	1	1	1	1	1	1	1	1	1
OG0000503	HOG0000548	74	1	1	1	1	1	1	1	1	1	1	1	1	1	1	1	1	1	1	1	1	1	1	1	1	1	1	1	1	1	1	1	1	1	1	1	1	1	1	1	1	1	1	1	1	1	1	1
OG0000504	HOG0000549	74	1	1	1	1	1	1	1	1	1	1	1	1	1	1	1	1	1	1	1	1	1	1	1	1	1	1	1	1	1	1	1	1	1	1	1	1	1	1	1	1	1	1	1	1	1	1	1
OG0000505	HOG0000550	74	1	1	1	1	1	1	1	1	1	1	1	1	1	1	1	1	1	1	1	1	1	1	1	1	1	1	1	1	1	1	1	1	1	1	1	1	1	1	1	1	1	1	1	1	1	1	1
OG0000506	HOG0000551	74	1	1	1	1	1	1	1	1	1	1	1	1	1	1	1	1	1	1	1	1	1	1	1	1	1	1	1	1	1	1	1	1	1	1	1	1	1	1	1	1	1	1	1	1	1	1	1
OG0000507	HOG0000552	74	1	1	1	1	1	1	1	1	1	1	1	1	1	1	1	1	1	1	1	1	1	1	1	1	1	1	1	1	1	1	1	1	1	1	1	1	1	1	1	1	1	1	1	1	1	1	1
OG0000508	HOG0000553	74	1	1	1	1	1	1	1	1	1	1	1	1	1	1	1	1	1	1	1	1	1	1	1	1	1	1	1	1	1	1	1	1	1	1	1	1	1	1	1	1	1	1	1	1	1	1	1
OG0000509	HOG0000554	74	1	1	1	1	1	1	1	1	1	1	1	1	1	1	1	1	1	1	1	1	1	1	1	1	1	1	1	1	1	1	1	1	1	1	1	1	1	1	1	1	1	1	1	1	1	1	1
OG0000510	HOG0000555	74	1	1	1	1	1	1	1	1	1	1	1	1	1	1	1	1	1	1	1	1	1	1	1	1	1	1	1	1	1	1	1	1	1	1	1	1	1	1	1	1	1	1	1	1	1	1	1
OG0000511	HOG0000556	74	1	1	1	1	1	1	1	1	1	1	1	1	1	1	1	1	1	1	1	1	1	1	1	1	1	1	1	1	1	1	1	1	1	1	1	1	1	1	1	1	1	1	1	1	1	1	1
OG0000512	HOG0000557	74	1	1	1	1	1	1	1	1	1	1	1	1	1	1	1	1	1	1	1	1	1	1	1	1	1	1	1	1	1	1	1	1	1	1	1	1	1	1	1	1	1	1	1	1	1	1	1
OG0000513	HOG0000558	74	1	1	1	1	1	1	1	1	1	1	1	1	1	1	1	1	1	1	1	1	1	1	1	1	1	1	1	1	1	1	1	1	1	1	1	1	1	1	1	1	1	1	1	1	1	1	1
OG0000514	HOG0000559	74	1	1	1	1	1	1	1	1	1	1	1	1	1	1	1	1	1	1	1	1	1	1	1	1	1	1	1	1	1	1	1	1	1	1	1	1	1	1	1	1	1	1	1	1	1	1	1
OG0000515	HOG0000560	74	1	1	1	1	1	1	1	1	1	1	1	1	1	1	1	1	1	1	1	1	1	1	1	1	1	1	1	1	1	1	1	1	1	1	1	1	1	1	1	1	1	1	1	1	1	1	1
OG0000516	HOG0000561	74	1	1	1	1	1	1	1	1	1	1	1	1	1	1	1	1	1	1	1	1	1	1	1	1	1	1	1	1	1	1	1	1	1	1	1	1	1	1	1	1	1	1	1	1	1	1	1
OG0000517	HOG0000562	74	1	1	1	1	1	1	1	1	1	1	1	1	1	1	1	1	1	1	1	1	1	1	1	1	1	1	1	1	1	1	1	1	1	1	1	1	1	1	1	1	1	1	1	1	1	1	1
OG0000518	HOG0000563	74	1	1	1	1	1	1	1	1	1	1	1	1	1	1	1	1	1	1	1	1	1	1	1	1	1	1	1	1	1	1	1	1	1	1	1	1	1	1	1	1	1	1	1	1	1	1	1
OG0000519	HOG0000564	74	1	1	1	1	1	1	1	1	1	1	1	1	1	1	1	1	1	1	1	1	1	1	1	1	1	1	1	1	1	1	1	1	1	1	1	1	1	1	1	1	1	1	1	1	1	1	1
OG0000520	HOG0000565	74	1	1	1	1	1	1	1	1	1	1	1	1	1	1	1	1	1	1	1	1	1	1	1	1	1	1	1	1	1	1	1	1	1	1	1	1	1	1	1	1	1	1	1	1	1	1	1
OG0000521	HOG0000566	74	1	1	1	1	1	1	1	1	1	1	1	1	1	1	1	1	1	1	1	1	1	1	1	1	1	1	1	1	1	1	1	1	1	1	1	1	1	1	1	1	1	1	1	1	1	1	1
OG0000522	HOG0000567	74	1	1	1	1	1	1	1	1	1	1	1	1	1	1	1	1	1	1	1	1	1	1	1	1	1	1	1	1	1	1	1	1	1	1	1	1	1	1	1	1	1	1	1	1	1	1	1
OG0000523	HOG0000568	74	1	1	1	1	1	1	1	1	1	1	1	1	1	1	1	1	1	1	1	1	1	1	1	1	1	1	1	1	1	1	1	1	1	1	1	1	1	1	1	1	1	1	1	1	1	1	1
OG0000524	HOG0000569	74	1	1	1	1	1	1	1	1	1	1	1	1	1	1	1	1	1	1	1	1	1	1	1	1	1	1	1	1	1	1	1	1	1	1	1	1	1	1	1	1	1	1	1	1	1	1	1
OG0000525	HOG0000570	74	1	1	1	1	1	1	1	1	1	1	1	1	1	1	1	1	1	1	1	1	1	1	1	1	1	1	1	1	1	1	1	1	1	1	1	1	1	1	1	1	1	1	1	1	1	1	1
OG0000526	HOG0000571	74	1	1	1	1	1	1	1	1	1	1	1	1	1	1	1	1	1	1	1	1	1	1	1	1	1	1	1	1	1	1	1	1	1	1	1	1	1	1	1	1	1	1	1	1	1	1	1
OG0000527	HOG0000572	74	1	1	1	1	1	1	1	1	1	1	1	1	1	1	1	1	1	1	1	1	1	1	1	1	1	1	1	1	1	1	1	1	1	1	1	1	1	1	1	1	1	1	1	1	1	1	1
OG0000528	HOG0000573	74	1	1	1	1	1	1	1	1	1	1	1	1	1	1	1	1	1	1	1	1	1	1	1	1	1	1	1	1	1	1	1	1	1	1	1	1	1	1	1	1	1	1	1	1	1	1	1
OG0000529	HOG0000574	74	1	1	1	1	1	1	1	1	1	1	1	1	1	1	1	1	1	1	1	1	1	1	1	1	1	1	1	1	1	1	1	1	1	1	1	1	1	1	1	1	1	1	1	1	1	1	1
OG0000530	HOG0000575	74	1	1	1	1	1	1	1	1	1	1	1	1	1	1	1	1	1	1	1	1	1	1	1	1	1	1	1	1	1	1	1	1	1	1	1	1	1	1	1	1	1	1	1	1	1	1	1
OG0000531	HOG0000576	74	1	1	1	1	1	1	1	1	1	1	1	1	1	1	1	1	1	1	1	1	1	1	1	1	1	1	1	1	1	1	1	1	1	1	1	1	1	1	1	1	1	1	1	1	1	1	1
OG0000532	HOG0000577	74	1	1	1	1	1	1	1	1	1	1	1	1	1	1	1	1	1	1	1	1	1	1	1	1	1	1	1	1	1	1	1	1	1	1	1	1	1	1	1	1	1	1	1	1	1	1	1
OG0000533	HOG0000578	74	1	1	1	1	1	1	1	1	1	1	1	1	1	1	1	1	1	1	1	1	1	1	1	1	1	1	1	1	1	1	1	1	1	1	1	1	1	1	1	1	1	1	1	1	1	1	1
OG0000534	HOG0000579	74	1	1	1	1	1	1	1	1	1	1	1	1	1	1	1	1	1	1	1	1	1	1	1	1	1	1	1	1	1	1	1	1	1	1	1	1	1	1	1	1	1	1	1	1	1	1	1
OG0000535	HOG0000580	74	1	1	1	1	1	1	1	1	1	1	1	1	1	1	1	1	1	1	1	1	1	1	1	1	1	1	1	1	1	1	1	1	1	1	1	1	1	1	1	1	1	1	1	1	1	1	1
OG0000536	HOG0000581	74	1	1	1	1	1	1	1	1	1	1	1	1	1	1	1	1	1	1	1	1	1	1	1	1	1	1	1	1	1	1	1	1	1	1	1	1	1	1	1	1	1	1	1	1	1	1	1
OG0000537	HOG0000582	74	1	1	1	1	1	1	1	1	1	1	1	1	1	1	1	1	1	1	1	1	1	1	1	1	1	1	1	1	1	1	1	1	1	1	1	1	1	1	1	1	1	1	1	1	1	1	1
OG0000538	HOG0000583	74	1	1	1	1	1	1	1	1	1	1	1	1	1	1	1	1	1	1	1	1	1	1	1	1	1	1	1	1	1	1	1	1	1	1	1	1	1	1	1	1	1	1	1	1	1	1	1
OG0000539	HOG0000584	74	1	1	1	1	1	1	1	1	1	1	1	1	1	1	1	1	1	1	1	1	1	1	1	1	1	1	1	1	1	1	1	1	1	1	1	1	1	1	1	1	1	1	1	1	1	1	1
OG0000540	HOG0000585	74	1	1	1	1	1	1	1	1	1	1	1	1	1	1	1	1	1	1	1	1	1	1	1	1	1	1	1	1	1	1	1	1	1	1	1	1	1	1	1	1	1	1	1	1	1	1	1
OG0000541	HOG0000586	74	1	1	1	1	1	1	1	1	1	1	1	1	1	1	1	1	1	1	1	1	1	1	1	1	1	1	1	1	1	1	1	1	1	1	1	1	1	1	1	1	1	1	1	1	1	1	1
OG0000542	HOG0000587	74	1	1	1	1	1	1	1	1	1	1	1	1	1	1	1	1	1	1	1	1	1	1	1	1	1	1	1	1	1	1	1	1	1	1	1	1	1	1	1	1	1	1	1	1	1	1	1
OG0000543	HOG0000588	74	1	1	1	1	1	1	1	1	1	1	1	1	1	1	1	1	1	1	1	1	1	1	1	1	1	1	1	1	1	1	1	1	1	1	1	1	1	1	1	1	1	1	1	1	1	1	1
OG0000544	HOG0000589	74	1	1	1	1	1	1	1	1	1	1	1	1	1	1	1	1	1	1	1	1	1	1	1	1	1	1	1	1	1	1	1	1	1	1	1	1	1	1	1	1	1	1	1	1	1	1	1
OG0000545	HOG0000590	74	1	1	1	1	1	1	1	1	1	1	1	1	1	1	1	1	1	1	1	1	1	1	1	1	1	1	1	1	1	1	1	1	1	1	1	1	1	1	1	1	1	1	1	1	1	1	1
OG0000546	HOG0000591	74	1	1	1	1	1	1	1	1	1	1	1	1	1	1	1	1	1	1	1	1	1	1	1	1	1	1	1	1	1	1	1	1	1	1	1	1	1	1	1	1	1	1	1	1	1	1	1
OG0000547	HOG0000592	74	1	1	1	1	1	1	1	1	1	1	1	1	1	1	1	1	1	1	1	1	1	1	1	1	1	1	1	1	1	1	1	1	1	1	1	1	1	1	1	1	1	1	1	1	1	1	1
OG0000548	HOG0000593	74	1	1	1	1	1	1	1	1	1	1	1	1	1	1	1	1	1	1	1	1	1	1	1	1	1	1	1	1	1	1	1	1	1	1	1	1	1	1	1	1	1	1	1	1	1	1	1
OG0000549	HOG0000594	74	1	1	1	1	1	1	1	1	1	1	1	1	1	1	1	1	1	1	1	1	1	1	1	1	1	1	1	1	1	1	1	1	1	1	1	1	1	1	1	1	1	1	1	1	1	1	1
OG0000550	HOG0000595	74	1	1	1	1	1	1	1	1	1	1	1	1	1	1	1	1	1	1	1	1	1	1	1	1	1	1	1	1	1	1	1	1	1	1	1	1	1	1	1	1	1	1	1	1	1	1	1
OG0000551	HOG0000596	74	1	1	1	1	1	1	1	1	1	1	1	1	1	1	1	1	1	1	1	1	1	1	1	1	1	1	1	1	1	1	1	1	1	1	1	1	1	1	1	1	1	1	1	1	1	1	1
OG0000552	HOG0000597	74	1	1	1	1	1	1	1	1	1	1	1	1	1	1	1	1	1	1	1	1	1	1	1	1	1	1	1	1	1	1	1	1	1	1	1	1	1	1	1	1	1	1	1	1	1	1	1
OG0000553	HOG0000598	74	1	1	1	1	1	1	1	1	1	1	1	1	1	1	1	1	1	1	1	1	1	1	1	1	1	1	1	1	1	1	1	1	1	1	1	1	1	1	1	1	1	1	1	1	1	1	1
OG0000554	HOG0000599	74	1	1	1	1	1	1	1	1	1	1	1	1	1	1	1	1	1	1	1	1	1	1	1	1	1	1	1	1	1	1	1	1	1	1	1	1	1	1	1	1	1	1	1	1	1	1	1
OG0000555	HOG0000600	74	1	1	1	1	1	1	1	1	1	1	1	1	1	1	1	1	1	1	1	1	1	1	1	1	1	1	1	1	1	1	1	1	1	1	1	1	1	1	1	1	1	1	1	1	1	1	1
OG0000556	HOG0000601	74	1	1	1	1	1	1	1	1	1	1	1	1	1	1	1	1	1	1	1	1	1	1	1	1	1	1	1	1	1	1	1	1	1	1	1	1	1	1	1	1	1	1	1	1	1	1	1
OG0000557	HOG0000602	74	1	1	1	1	1	1	1	1	1	1	1	1	1	1	1	1	1	1	1	1	1	1	1	1	1	1	1	1	1	1	1	1	1	1	1	1	1	1	1	1	1	1	1	1	1	1	1
OG0000558	HOG0000603	74	1	1	1	1	1	1	1	1	1	1	1	1	1	1	1	1	1	1	1	1	1	1	1	1	1	1	1	1	1	1	1	1	1	1	1	1	1	1	1	1	1	1	1	1	1	1	1
OG0000559	HOG0000604	74	1	1	1	1	1	1	1	1	1	1	1	1	1	1	1	1	1	1	1	1	1	1	1	1	1	1	1	1	1	1	1	1	1	1	1	1	1	1	1	1	1	1	1	1	1	1	1
OG0000560	HOG0000605	74	1	1	1	1	1	1	1	1	1	1	1	1	1	1	1	1	1	1	1	1	1	1	1	1	1	1	1	1	1	1	1	1	1	1	1	1	1	1	1	1	1	1	1	1	1	1	1
OG0000561	HOG0000606	74	1	1	1	1	1	1	1	1	1	1	1	1	1	1	1	1	1	1	1	1	1	1	1	1	1	1	1	1	1	1	1	1	1	1	1	1	1	1	1	1	1	1	1	1	1	1	1
OG0000562	HOG0000607	74	1	1	1	1	1	1	1	1	1	1	1	1	1	1	1	1	1	1	1	1	1	1	1	1	1	1	1	1	1	1	1	1	1	1	1	1	1	1	1	1	1	1	1	1	1	1	1
OG0000563	HOG0000608	74	1	1	1	1	1	1	1	1	1	1	1	1	1	1	1	1	1	1	1	1	1	1	1	1	1	1	1	1	1	1	1	1	1	1	1	1	1	1	1	1	1	1	1	1	1	1	1
OG0000564	HOG0000609	74	1	1	1	1	1	1	1	1	1	1	1	1	1	1	1	1	1	1	1	1	1	1	1	1	1	1	1	1	1	1	1	1	1	1	1	1	1	1	1	1	1	1	1	1	1	1	1
OG0000565	HOG0000610	74	1	1	1	1	1	1	1	1	1	1	1	1	1	1	1	1	1	1	1	1	1	1	1	1	1	1	1	1	1	1	1	1	1	1	1	1	1	1	1	1	1	1	1	1	1	1	1
OG0000566	HOG0000611	74	1	1	1	1	1	1	1	1	1	1	1	1	1	1	1	1	1	1	1	1	1	1	1	1	1	1	1	1	1	1	1	1	1	1	1	1	1	1	1	1	1	1	1	1	1	1	1
OG0000567	HOG0000612	74	1	1	1	1	1	1	1	1	1	1	1	1	1	1	1	1	1	1	1	1	1	1	1	1	1	1	1	1	1	1	1	1	1	1	1	1	1	1	1	1	1	1	1	1	1	1	1
OG0000568	HOG0000613	74	1	1	1	1	1	1	1	1	1	1	1	1	1	1	1	1	1	1	1	1	1	1	1	1	1	1	1	1	1	1	1	1	1	1	1	1	1	1	1	1	1	1	1	1	1	1	1
OG0000569	HOG0000614	74	1	1	1	1	1	1	1	1	1	1	1	1	1	1	1	1	1	1	1	1	1	1	1	1	1	1	1	1	1	1	1	1	1	1	1	1	1	1	1	1	1	1	1	1	1	1	1
OG0000570	HOG0000615	74	1	1	1	1	1	1	1	1	1	1	1	1	1	1	1	1	1	1	1	1	1	1	1	1	1	1	1	1	1	1	1	1	1	1	1	1	1	1	1	1	1	1	1	1	1	1	1
OG0000571	HOG0000616	74	1	1	1	1	1	1	1	1	1	1	1	1	1	1	1	1	1	1	1	1	1	1	1	1	1	1	1	1	1	1	1	1	1	1	1	1	1	1	1	1	1	1	1	1	1	1	1
OG0000572	HOG0000617	74	1	1	1	1	1	1	1	1	1	1	1	1	1	1	1	1	1	1	1	1	1	1	1	1	1	1	1	1	1	1	1	1	1	1	1	1	1	1	1	1	1	1	1	1	1	1	1
OG0000573	HOG0000618	74	1	1	1	1	1	1	1	1	1	1	1	1	1	1	1	1	1	1	1	1	1	1	1	1	1	1	1	1	1	1	1	1	1	1	1	1	1	1	1	1	1	1	1	1	1	1	1
OG0000574	HOG0000619	74	1	1	1	1	1	1	1	1	1	1	1	1	1	1	1	1	1	1	1	1	1	1	1	1	1	1	1	1	1	1	1	1	1	1	1	1	1	1	1	1	1	1	1	1	1	1	1
OG0000575	HOG0000620	74	1	1	1	1	1	1	1	1	1	1	1	1	1	1	1	1	1	1	1	1	1	1	1	1	1	1	1	1	1	1	1	1	1	1	1	1	1	1	1	1	1	1	1	1	1	1	1
OG0000576	HOG0000621	74	1	1	1	1	1	1	1	1	1	1	1	1	1	1	1	1	1	1	1	1	1	1	1	1	1	1	1	1	1	1	1	1	1	1	1	1	1	1	1	1	1	1	1	1	1	1	1
OG0000577	HOG0000622	74	1	1	1	1	1	1	1	1	1	1	1	1	1	1	1	1	1	1	1	1	1	1	1	1	1	1	1	1	1	1	1	1	1	1	1	1	1	1	1	1	1	1	1	1	1	1	1
OG0000578	HOG0000623	74	1	1	1	1	1	1	1	1	1	1	1	1	1	1	1	1	1	1	1	1	1	1	1	1	1	1	1	1	1	1	1	1	1	1	1	1	1	1	1	1	1	1	1	1	1	1	1
OG0000579	HOG0000624	74	1	1	1	1	1	1	1	1	1	1	1	1	1	1	1	1	1	1	1	1	1	1	1	1	1	1	1	1	1	1	1	1	1	1	1	1	1	1	1	1	1	1	1	1	1	1	1
OG0000580	HOG0000625	74	1	1	1	1	1	1	1	1	1	1	1	1	1	1	1	1	1	1	1	1	1	1	1	1	1	1	1	1	1	1	1	1	1	1	1	1	1	1	1	1	1	1	1	1	1	1	1
OG0000581	HOG0000626	74	1	1	1	1	1	1	1	1	1	1	1	1	1	1	1	1	1	1	1	1	1	1	1	1	1	1	1	1	1	1	1	1	1	1	1	1	1	1	1	1	1	1	1	1	1	1	1
OG0000582	HOG0000627	74	1	1	1	1	1	1	1	1	1	1	1	1	1	1	1	1	1	1	1	1	1	1	1	1	1	1	1	1	1	1	1	1	1	1	1	1	1	1	1	1	1	1	1	1	1	1	1
OG0000583	HOG0000628	74	1	1	1	1	1	1	1	1	1	1	1	1	1	1	1	1	1	1	1	1	1	1	1	1	1	1	1	1	1	1	1	1	1	1	1	1	1	1	1	1	1	1	1	1	1	1	1
OG0000584	HOG0000629	74	1	1	1	1	1	1	1	1	1	1	1	1	1	1	1	1	1	1	1	1	1	1	1	1	1	1	1	1	1	1	1	1	1	1	1	1	1	1	1	1	1	1	1	1	1	1	1
OG0000585	HOG0000630	74	1	1	1	1	1	1	1	1	1	1	1	1	1	1	1	1	1	1	1	1	1	1	1	1	1	1	1	1	1	1	1	1	1	1	1	1	1	1	1	1	1	1	1	1	1	1	1
OG0000586	HOG0000631	74	1	1	1	1	1	1	1	1	1	1	1	1	1	1	1	1	1	1	1	1	1	1	1	1	1	1	1	1	1	1	1	1	1	1	1	1	1	1	1	1	1	1	1	1	1	1	1
OG0000587	HOG0000632	74	1	1	1	1	1	1	1	1	1	1	1	1	1	1	1	1	1	1	1	1	1	1	1	1	1	1	1	1	1	1	1	1	1	1	1	1	1	1	1	1	1	1	1	1	1	1	1
OG0000588	HOG0000633	74	1	1	1	1	1	1	1	1	1	1	1	1	1	1	1	1	1	1	1	1	1	1	1	1	1	1	1	1	1	1	1	1	1	1	1	1	1	1	1	1	1	1	1	1	1	1	1
OG0000589	HOG0000634	74	1	1	1	1	1	1	1	1	1	1	1	1	1	1	1	1	1	1	1	1	1	1	1	1	1	1	1	1	1	1	1	1	1	1	1	1	1	1	1	1	1	1	1	1	1	1	1
OG0000590	HOG0000635	74	1	1	1	1	1	1	1	1	1	1	1	1	1	1	1	1	1	1	1	1	1	1	1	1	1	1	1	1	1	1	1	1	1	1	1	1	1	1	1	1	1	1	1	1	1	1	1
OG0000591	HOG0000636	74	1	1	1	1	1	1	1	1	1	1	1	1	1	1	1	1	1	1	1	1	1	1	1	1	1	1	1	1	1	1	1	1	1	1	1	1	1	1	1	1	1	1	1	1	1	1	1
OG0000592	HOG0000637	74	1	1	1	1	1	1	1	1	1	1	1	1	1	1	1	1	1	1	1	1	1	1	1	1	1	1	1	1	1	1	1	1	1	1	1	1	1	1	1	1	1	1	1	1	1	1	1
OG0000593	HOG0000638	74	1	1	1	1	1	1	1	1	1	1	1	1	1	1	1	1	1	1	1	1	1	1	1	1	1	1	1	1	1	1	1	1	1	1	1	1	1	1	1	1	1	1	1	1	1	1	1
OG0000594	HOG0000639	74	1	1	1	1	1	1	1	1	1	1	1	1	1	1	1	1	1	1	1	1	1	1	1	1	1	1	1	1	1	1	1	1	1	1	1	1	1	1	1	1	1	1	1	1	1	1	1
OG0000595	HOG0000640	74	1	1	1	1	1	1	1	1	1	1	1	1	1	1	1	1	1	1	1	1	1	1	1	1	1	1	1	1	1	1	1	1	1	1	1	1	1	1	1	1	1	1	1	1	1	1	1
OG0000596	HOG0000641	74	1	1	1	1	1	1	1	1	1	1	1	1	1	1	1	1	1	1	1	1	1	1	1	1	1	1	1	1	1	1	1	1	1	1	1	1	1	1	1	1	1	1	1	1	1	1	1
OG0000597	HOG0000642	74	1	1	1	1	1	1	1	1	1	1	1	1	1	1	1	1	1	1	1	1	1	1	1	1	1	1	1	1	1	1	1	1	1	1	1	1	1	1	1	1	1	1	1	1	1	1	1
OG0000598	HOG0000643	74	1	1	1	1	1	1	1	1	1	1	1	1	1	1	1	1	1	1	1	1	1	1	1	1	1	1	1	1	1	1	1	1	1	1	1	1	1	1	1	1	1	1	1	1	1	1	1
OG0000599	HOG0000644	74	1	1	1	1	1	1	1	1	1	1	1	1	1	1	1	1	1	1	1	1	1	1	1	1	1	1	1	1	1	1	1	1	1	1	1	1	1	1	1	1	1	1	1	1	1	1	1
OG0000600	HOG0000645	74	1	1	1	1	1	1	1	1	1	1	1	1	1	1	1	1	1	1	1	1	1	1	1	1	1	1	1	1	1	1	1	1	1	1	1	1	1	1	1	1	1	1	1	1	1	1	1
OG0000601	HOG0000646	74	1	1	1	1	1	1	1	1	1	1	1	1	1	1	1	1	1	1	1	1	1	1	1	1	1	1	1	1	1	1	1	1	1	1	1	1	1	1	1	1	1	1	1	1	1	1	1
OG0000602	HOG0000647	74	1	1	1	1	1	1	1	1	1	1	1	1	1	1	1	1	1	1	1	1	1	1	1	1	1	1	1	1	1	1	1	1	1	1	1	1	1	1	1	1	1	1	1	1	1	1	1
OG0000603	HOG0000648	74	1	1	1	1	1	1	1	1	1	1	1	1	1	1	1	1	1	1	1	1	1	1	1	1	1	1	1	1	1	1	1	1	1	1	1	1	1	1	1	1	1	1	1	1	1	1	1
OG0000604	HOG0000649	74	1	1	1	1	1	1	1	1	1	1	1	1	1	1	1	1	1	1	1	1	1	1	1	1	1	1	1	1	1	1	1	1	1	1	1	1	1	1	1	1	1	1	1	1	1	1	1
OG0000605	HOG0000650	74	1	1	1	1	1	1	1	1	1	1	1	1	1	1	1	1	1	1	1	1	1	1	1	1	1	1	1	1	1	1	1	1	1	1	1	1	1	1	1	1	1	1	1	1	1	1	1
OG0000606	HOG0000651	74	1	1	1	1	1	1	1	1	1	1	1	1	1	1	1	1	1	1	1	1	1	1	1	1	1	1	1	1	1	1	1	1	1	1	1	1	1	1	1	1	1	1	1	1	1	1	1
OG0000607	HOG0000652	74	1	1	1	1	1	1	1	1	1	1	1	1	1	1	1	1	1	1	1	1	1	1	1	1	1	1	1	1	1	1	1	1	1	1	1	1	1	1	1	1	1	1	1	1	1	1	1
OG0000608	HOG0000653	74	1	1	1	1	1	1	1	1	1	1	1	1	1	1	1	1	1	1	1	1	1	1	1	1	1	1	1	1	1	1	1	1	1	1	1	1	1	1	1	1	1	1	1	1	1	1	1
OG0000609	HOG0000654	74	1	1	1	1	1	1	1	1	1	1	1	1	1	1	1	1	1	1	1	1	1	1	1	1	1	1	1	1	1	1	1	1	1	1	1	1	1	1	1	1	1	1	1	1	1	1	1
OG0000610	HOG0000655	74	1	1	1	1	1	1	1	1	1	1	1	1	1	1	1	1	1	1	1	1	1	1	1	1	1	1	1	1	1	1	1	1	1	1	1	1	1	1	1	1	1	1	1	1	1	1	1
OG0000611	HOG0000656	74	1	1	1	1	1	1	1	1	1	1	1	1	1	1	1	1	1	1	1	1	1	1	1	1	1	1	1	1	1	1	1	1	1	1	1	1	1	1	1	1	1	1	1	1	1	1	1
OG0000612	HOG0000657	74	1	1	1	1	1	1	1	1	1	1	1	1	1	1	1	1	1	1	1	1	1	1	1	1	1	1	1	1	1	1	1	1	1	1	1	1	1	1	1	1	1	1	1	1	1	1	1
OG0000613	HOG0000658	74	1	1	1	1	1	1	1	1	1	1	1	1	1	1	1	1	1	1	1	1	1	1	1	1	1	1	1	1	1	1	1	1	1	1	1	1	1	1	1	1	1	1	1	1	1	1	1
OG0000614	HOG0000659	74	1	1	1	1	1	1	1	1	1	1	1	1	1	1	1	1	1	1	1	1	1	1	1	1	1	1	1	1	1	1	1	1	1	1	1	1	1	1	1	1	1	1	1	1	1	1	1
OG0000615	HOG0000660	74	1	1	1	1	1	1	1	1	1	1	1	1	1	1	1	1	1	1	1	1	1	1	1	1	1	1	1	1	1	1	1	1	1	1	1	1	1	1	1	1	1	1	1	1	1	1	1
OG0000616	HOG0000661	74	1	1	1	1	1	1	1	1	1	1	1	1	1	1	1	1	1	1	1	1	1	1	1	1	1	1	1	1	1	1	1	1	1	1	1	1	1	1	1	1	1	1	1	1	1	1	1
OG0000617	HOG0000662	74	1	1	1	1	1	1	1	1	1	1	1	1	1	1	1	1	1	1	1	1	1	1	1	1	1	1	1	1	1	1	1	1	1	1	1	1	1	1	1	1	1	1	1	1	1	1	1
OG0000618	HOG0000663	74	1	1	1	1	1	1	1	1	1	1	1	1	1	1	1	1	1	1	1	1	1	1	1	1	1	1	1	1	1	1	1	1	1	1	1	1	1	1	1	1	1	1	1	1	1	1	1
OG0000619	HOG0000664	74	1	1	1	1	1	1	1	1	1	1	1	1	1	1	1	1	1	1	1	1	1	1	1	1	1	1	1	1	1	1	1	1	1	1	1	1	1	1	1	1	1	1	1	1	1	1	1
OG0000620	HOG0000665	74	1	1	1	1	1	1	1	1	1	1	1	1	1	1	1	1	1	1	1	1	1	1	1	1	1	1	1	1	1	1	1	1	1	1	1	1	1	1	1	1	1	1	1	1	1	1	1
OG0000621	HOG0000666	74	1	1	1	1	1	1	1	1	1	1	1	1	1	1	1	1	1	1	1	1	1	1	1	1	1	1	1	1	1	1	1	1	1	1	1	1	1	1	1	1	1	1	1	1	1	1	1
OG0000622	HOG0000667	74	1	1	1	1	1	1	1	1	1	1	1	1	1	1	1	1	1	1	1	1	1	1	1	1	1	1	1	1	1	1	1	1	1	1	1	1	1	1	1	1	1	1	1	1	1	1	1
OG0000623	HOG0000668	74	1	1	1	1	1	1	1	1	1	1	1	1	1	1	1	1	1	1	1	1	1	1	1	1	1	1	1	1	1	1	1	1	1	1	1	1	1	1	1	1	1	1	1	1	1	1	1
OG0000624	HOG0000669	74	1	1	1	1	1	1	1	1	1	1	1	1	1	1	1	1	1	1	1	1	1	1	1	1	1	1	1	1	1	1	1	1	1	1	1	1	1	1	1	1	1	1	1	1	1	1	1
OG0000625	HOG0000670	74	1	1	1	1	1	1	1	1	1	1	1	1	1	1	1	1	1	1	1	1	1	1	1	1	1	1	1	1	1	1	1	1	1	1	1	1	1	1	1	1	1	1	1	1	1	1	1
OG0000626	HOG0000671	74	1	1	1	1	1	1	1	1	1	1	1	1	1	1	1	1	1	1	1	1	1	1	1	1	1	1	1	1	1	1	1	1	1	1	1	1	1	1	1	1	1	1	1	1	1	1	1
OG0000627	HOG0000672	74	1	1	1	1	1	1	1	1	1	1	1	1	1	1	1	1	1	1	1	1	1	1	1	1	1	1	1	1	1	1	1	1	1	1	1	1	1	1	1	1	1	1	1	1	1	1	1
OG0000628	HOG0000673	74	1	1	1	1	1	1	1	1	1	1	1	1	1	1	1	1	1	1	1	1	1	1	1	1	1	1	1	1	1	1	1	1	1	1	1	1	1	1	1	1	1	1	1	1	1	1	1
OG0000629	HOG0000674	74	1	1	1	1	1	1	1	1	1	1	1	1	1	1	1	1	1	1	1	1	1	1	1	1	1	1	1	1	1	1	1	1	1	1	1	1	1	1	1	1	1	1	1	1	1	1	1
OG0000630	HOG0000675	74	1	1	1	1	1	1	1	1	1	1	1	1	1	1	1	1	1	1	1	1	1	1	1	1	1	1	1	1	1	1	1	1	1	1	1	1	1	1	1	1	1	1	1	1	1	1	1
OG0000631	HOG0000676	74	1	1	1	1	1	1	1	1	1	1	1	1	1	1	1	1	1	1	1	1	1	1	1	1	1	1	1	1	1	1	1	1	1	1	1	1	1	1	1	1	1	1	1	1	1	1	1
OG0000632	HOG0000677	74	1	1	1	1	1	1	1	1	1	1	1	1	1	1	1	1	1	1	1	1	1	1	1	1	1	1	1	1	1	1	1	1	1	1	1	1	1	1	1	1	1	1	1	1	1	1	1
OG0000633	HOG0000678	74	1	1	1	1	1	1	1	1	1	1	1	1	1	1	1	1	1	1	1	1	1	1	1	1	1	1	1	1	1	1	1	1	1	1	1	1	1	1	1	1	1	1	1	1	1	1	1
OG0000634	HOG0000679	74	1	1	1	1	1	1	1	1	1	1	1	1	1	1	1	1	1	1	1	1	1	1	1	1	1	1	1	1	1	1	1	1	1	1	1	1	1	1	1	1	1	1	1	1	1	1	1
OG0000635	HOG0000680	74	1	1	1	1	1	1	1	1	1	1	1	1	1	1	1	1	1	1	1	1	1	1	1	1	1	1	1	1	1	1	1	1	1	1	1	1	1	1	1	1	1	1	1	1	1	1	1
OG0000636	HOG0000681	74	1	1	1	1	1	1	1	1	1	1	1	1	1	1	1	1	1	1	1	1	1	1	1	1	1	1	1	1	1	1	1	1	1	1	1	1	1	1	1	1	1	1	1	1	1	1	1
OG0000637	HOG0000682	74	1	1	1	1	1	1	1	1	1	1	1	1	1	1	1	1	1	1	1	1	1	1	1	1	1	1	1	1	1	1	1	1	1	1	1	1	1	1	1	1	1	1	1	1	1	1	1
OG0000638	HOG0000683	74	1	1	1	1	1	1	1	1	1	1	1	1	1	1	1	1	1	1	1	1	1	1	1	1	1	1	1	1	1	1	1	1	1	1	1	1	1	1	1	1	1	1	1	1	1	1	1
OG0000639	HOG0000684	74	1	1	1	1	1	1	1	1	1	1	1	1	1	1	1	1	1	1	1	1	1	1	1	1	1	1	1	1	1	1	1	1	1	1	1	1	1	1	1	1	1	1	1	1	1	1	1
OG0000640	HOG0000685	74	1	1	1	1	1	1	1	1	1	1	1	1	1	1	1	1	1	1	1	1	1	1	1	1	1	1	1	1	1	1	1	1	1	1	1	1	1	1	1	1	1	1	1	1	1	1	1
OG0000641	HOG0000686	74	1	1	1	1	1	1	1	1	1	1	1	1	1	1	1	1	1	1	1	1	1	1	1	1	1	1	1	1	1	1	1	1	1	1	1	1	1	1	1	1	1	1	1	1	1	1	1
OG0000642	HOG0000687	74	1	1	1	1	1	1	1	1	1	1	1	1	1	1	1	1	1	1	1	1	1	1	1	1	1	1	1	1	1	1	1	1	1	1	1	1	1	1	1	1	1	1	1	1	1	1	1
OG0000643	HOG0000688	74	1	1	1	1	1	1	1	1	1	1	1	1	1	1	1	1	1	1	1	1	1	1	1	1	1	1	1	1	1	1	1	1	1	1	1	1	1	1	1	1	1	1	1	1	1	1	1
OG0000644	HOG0000689	74	1	1	1	1	1	1	1	1	1	1	1	1	1	1	1	1	1	1	1	1	1	1	1	1	1	1	1	1	1	1	1	1	1	1	1	1	1	1	1	1	1	1	1	1	1	1	1
OG0000645	HOG0000690	74	1	1	1	1	1	1	1	1	1	1	1	1	1	1	1	1	1	1	1	1	1	1	1	1	1	1	1	1	1	1	1	1	1	1	1	1	1	1	1	1	1	1	1	1	1	1	1
OG0000646	HOG0000691	74	1	1	1	1	1	1	1	1	1	1	1	1	1	1	1	1	1	1	1	1	1	1	1	1	1	1	1	1	1	1	1	1	1	1	1	1	1	1	1	1	1	1	1	1	1	1	1
OG0000647	HOG0000692	74	1	1	1	1	1	1	1	1	1	1	1	1	1	1	1	1	1	1	1	1	1	1	1	1	1	1	1	1	1	1	1	1	1	1	1	1	1	1	1	1	1	1	1	1	1	1	1
OG0000648	HOG0000693	74	1	1	1	1	1	1	1	1	1	1	1	1	1	1	1	1	1	1	1	1	1	1	1	1	1	1	1	1	1	1	1	1	1	1	1	1	1	1	1	1	1	1	1	1	1	1	1
OG0000649	HOG0000694	74	1	1	1	1	1	1	1	1	1	1	1	1	1	1	1	1	1	1	1	1	1	1	1	1	1	1	1	1	1	1	1	1	1	1	1	1	1	1	1	1	1	1	1	1	1	1	1
OG0000650	HOG0000695	74	1	1	1	1	1	1	1	1	1	1	1	1	1	1	1	1	1	1	1	1	1	1	1	1	1	1	1	1	1	1	1	1	1	1	1	1	1	1	1	1	1	1	1	1	1	1	1
OG0000651	HOG0000696	74	1	1	1	1	1	1	1	1	1	1	1	1	1	1	1	1	1	1	1	1	1	1	1	1	1	1	1	1	1	1	1	1	1	1	1	1	1	1	1	1	1	1	1	1	1	1	1
OG0000652	HOG0000697	74	1	1	1	1	1	1	1	1	1	1	1	1	1	1	1	1	1	1	1	1	1	1	1	1	1	1	1	1	1	1	1	1	1	1	1	1	1	1	1	1	1	1	1	1	1	1	1
OG0000653	HOG0000698	74	1	1	1	1	1	1	1	1	1	1	1	1	1	1	1	1	1	1	1	1	1	1	1	1	1	1	1	1	1	1	1	1	1	1	1	1	1	1	1	1	1	1	1	1	1	1	1
OG0000654	HOG0000699	74	1	1	1	1	1	1	1	1	1	1	1	1	1	1	1	1	1	1	1	1	1	1	1	1	1	1	1	1	1	1	1	1	1	1	1	1	1	1	1	1	1	1	1	1	1	1	1
OG0000655	HOG0000700	74	1	1	1	1	1	1	1	1	1	1	1	1	1	1	1	1	1	1	1	1	1	1	1	1	1	1	1	1	1	1	1	1	1	1	1	1	1	1	1	1	1	1	1	1	1	1	1
OG0000656	HOG0000701	74	1	1	1	1	1	1	1	1	1	1	1	1	1	1	1	1	1	1	1	1	1	1	1	1	1	1	1	1	1	1	1	1	1	1	1	1	1	1	1	1	1	1	1	1	1	1	1
OG0000657	HOG0000702	74	1	1	1	1	1	1	1	1	1	1	1	1	1	1	1	1	1	1	1	1	1	1	1	1	1	1	1	1	1	1	1	1	1	1	1	1	1	1	1	1	1	1	1	1	1	1	1
OG0000658	HOG0000703	74	1	1	1	1	1	1	1	1	1	1	1	1	1	1	1	1	1	1	1	1	1	1	1	1	1	1	1	1	1	1	1	1	1	1	1	1	1	1	1	1	1	1	1	1	1	1	1
OG0000659	HOG0000704	74	1	1	1	1	1	1	1	1	1	1	1	1	1	1	1	1	1	1	1	1	1	1	1	1	1	1	1	1	1	1	1	1	1	1	1	1	1	1	1	1	1	1	1	1	1	1	1
OG0000660	HOG0000705	74	1	1	1	1	1	1	1	1	1	1	1	1	1	1	1	1	1	1	1	1	1	1	1	1	1	1	1	1	1	1	1	1	1	1	1	1	1	1	1	1	1	1	1	1	1	1	1
OG0000661	HOG0000706	74	1	1	1	1	1	1	1	1	1	1	1	1	1	1	1	1	1	1	1	1	1	1	1	1	1	1	1	1	1	1	1	1	1	1	1	1	1	1	1	1	1	1	1	1	1	1	1
OG0000662	HOG0000707	74	1	1	1	1	1	1	1	1	1	1	1	1	1	1	1	1	1	1	1	1	1	1	1	1	1	1	1	1	1	1	1	1	1	1	1	1	1	1	1	1	1	1	1	1	1	1	1
OG0000663	HOG0000708	74	1	1	1	1	1	1	1	1	1	1	1	1	1	1	1	1	1	1	1	1	1	1	1	1	1	1	1	1	1	1	1	1	1	1	1	1	1	1	1	1	1	1	1	1	1	1	1
OG0000664	HOG0000709	74	1	1	1	1	1	1	1	1	1	1	1	1	1	1	1	1	1	1	1	1	1	1	1	1	1	1	1	1	1	1	1	1	1	1	1	1	1	1	1	1	1	1	1	1	1	1	1
OG0000665	HOG0000710	74	1	1	1	1	1	1	1	1	1	1	1	1	1	1	1	1	1	1	1	1	1	1	1	1	1	1	1	1	1	1	1	1	1	1	1	1	1	1	1	1	1	1	1	1	1	1	1
OG0000666	HOG0000711	74	1	1	1	1	1	1	1	1	1	1	1	1	1	1	1	1	1	1	1	1	1	1	1	1	1	1	1	1	1	1	1	1	1	1	1	1	1	1	1	1	1	1	1	1	1	1	1
OG0000667	HOG0000712	74	1	1	1	1	1	1	1	1	1	1	1	1	1	1	1	1	1	1	1	1	1	1	1	1	1	1	1	1	1	1	1	1	1	1	1	1	1	1	1	1	1	1	1	1	1	1	1
OG0000668	HOG0000713	74	1	1	1	1	1	1	1	1	1	1	1	1	1	1	1	1	1	1	1	1	1	1	1	1	1	1	1	1	1	1	1	1	1	1	1	1	1	1	1	1	1	1	1	1	1	1	1
OG0000669	HOG0000714	74	1	1	1	1	1	1	1	1	1	1	1	1	1	1	1	1	1	1	1	1	1	1	1	1	1	1	1	1	1	1	1	1	1	1	1	1	1	1	1	1	1	1	1	1	1	1	1
OG0000670	HOG0000715	74	1	1	1	1	1	1	1	1	1	1	1	1	1	1	1	1	1	1	1	1	1	1	1	1	1	1	1	1	1	1	1	1	1	1	1	1	1	1	1	1	1	1	1	1	1	1	1
OG0000671	HOG0000716	74	1	1	1	1	1	1	1	1	1	1	1	1	1	1	1	1	1	1	1	1	1	1	1	1	1	1	1	1	1	1	1	1	1	1	1	1	1	1	1	1	1	1	1	1	1	1	1
OG0000672	HOG0000717	74	1	1	1	1	1	1	1	1	1	1	1	1	1	1	1	1	1	1	1	1	1	1	1	1	1	1	1	1	1	1	1	1	1	1	1	1	1	1	1	1	1	1	1	1	1	1	1
OG0000673	HOG0000718	74	1	1	1	1	1	1	1	1	1	1	1	1	1	1	1	1	1	1	1	1	1	1	1	1	1	1	1	1	1	1	1	1	1	1	1	1	1	1	1	1	1	1	1	1	1	1	1
OG0000674	HOG0000719	74	1	1	1	1	1	1	1	1	1	1	1	1	1	1	1	1	1	1	1	1	1	1	1	1	1	1	1	1	1	1	1	1	1	1	1	1	1	1	1	1	1	1	1	1	1	1	1
OG0000675	HOG0000720	74	1	1	1	1	1	1	1	1	1	1	1	1	1	1	1	1	1	1	1	1	1	1	1	1	1	1	1	1	1	1	1	1	1	1	1	1	1	1	1	1	1	1	1	1	1	1	1
OG0000676	HOG0000721	74	1	1	1	1	1	1	1	1	1	1	1	1	1	1	1	1	1	1	1	1	1	1	1	1	1	1	1	1	1	1	1	1	1	1	1	1	1	1	1	1	1	1	1	1	1	1	1
OG0000677	HOG0000722	74	1	1	1	1	1	1	1	1	1	1	1	1	1	1	1	1	1	1	1	1	1	1	1	1	1	1	1	1	1	1	1	1	1	1	1	1	1	1	1	1	1	1	1	1	1	1	1
OG0000678	HOG0000723	74	1	1	1	1	1	1	1	1	1	1	1	1	1	1	1	1	1	1	1	1	1	1	1	1	1	1	1	1	1	1	1	1	1	1	1	1	1	1	1	1	1	1	1	1	1	1	1
OG0000679	HOG0000724	74	1	1	1	1	1	1	1	1	1	1	1	1	1	1	1	1	1	1	1	1	1	1	1	1	1	1	1	1	1	1	1	1	1	1	1	1	1	1	1	1	1	1	1	1	1	1	1
OG0000680	HOG0000725	74	1	1	1	1	1	1	1	1	1	1	1	1	1	1	1	1	1	1	1	1	1	1	1	1	1	1	1	1	1	1	1	1	1	1	1	1	1	1	1	1	1	1	1	1	1	1	1
OG0000681	HOG0000726	74	1	1	1	1	1	1	1	1	1	1	1	1	1	1	1	1	1	1	1	1	1	1	1	1	1	1	1	1	1	1	1	1	1	1	1	1	1	1	1	1	1	1	1	1	1	1	1
OG0000682	HOG0000727	74	1	1	1	1	1	1	1	1	1	1	1	1	1	1	1	1	1	1	1	1	1	1	1	1	1	1	1	1	1	1	1	1	1	1	1	1	1	1	1	1	1	1	1	1	1	1	1
OG0000683	HOG0000728	74	1	1	1	1	1	1	1	1	1	1	1	1	1	1	1	1	1	1	1	1	1	1	1	1	1	1	1	1	1	1	1	1	1	1	1	1	1	1	1	1	1	1	1	1	1	1	1
OG0000684	HOG0000729	74	1	1	1	1	1	1	1	1	1	1	1	1	1	1	1	1	1	1	1	1	1	1	1	1	1	1	1	1	1	1	1	1	1	1	1	1	1	1	1	1	1	1	1	1	1	1	1
OG0000685	HOG0000730	74	1	1	1	1	1	1	1	1	1	1	1	1	1	1	1	1	1	1	1	1	1	1	1	1	1	1	1	1	1	1	1	1	1	1	1	1	1	1	1	1	1	1	1	1	1	1	1
OG0000686	HOG0000731	74	1	1	1	1	1	1	1	1	1	1	1	1	1	1	1	1	1	1	1	1	1	1	1	1	1	1	1	1	1	1	1	1	1	1	1	1	1	1	1	1	1	1	1	1	1	1	1
OG0000687	HOG0000732	74	1	1	1	1	1	1	1	1	1	1	1	1	1	1	1	1	1	1	1	1	1	1	1	1	1	1	1	1	1	1	1	1	1	1	1	1	1	1	1	1	1	1	1	1	1	1	1
OG0000688	HOG0000733	74	1	1	1	1	1	1	1	1	1	1	1	1	1	1	1	1	1	1	1	1	1	1	1	1	1	1	1	1	1	1	1	1	1	1	1	1	1	1	1	1	1	1	1	1	1	1	1
OG0000689	HOG0000734	74	1	1	1	1	1	1	1	1	1	1	1	1	1	1	1	1	1	1	1	1	1	1	1	1	1	1	1	1	1	1	1	1	1	1	1	1	1	1	1	1	1	1	1	1	1	1	1
OG0000690	HOG0000735	74	1	1	1	1	1	1	1	1	1	1	1	1	1	1	1	1	1	1	1	1	1	1	1	1	1	1	1	1	1	1	1	1	1	1	1	1	1	1	1	1	1	1	1	1	1	1	1
OG0000691	HOG0000736	74	1	1	1	1	1	1	1	1	1	1	1	1	1	1	1	1	1	1	1	1	1	1	1	1	1	1	1	1	1	1	1	1	1	1	1	1	1	1	1	1	1	1	1	1	1	1	1
OG0000692	HOG0000737	74	1	1	1	1	1	1	1	1	1	1	1	1	1	1	1	1	1	1	1	1	1	1	1	1	1	1	1	1	1	1	1	1	1	1	1	1	1	1	1	1	1	1	1	1	1	1	1
OG0000693	HOG0000738	74	1	1	1	1	1	1	1	1	1	1	1	1	1	1	1	1	1	1	1	1	1	1	1	1	1	1	1	1	1	1	1	1	1	1	1	1	1	1	1	1	1	1	1	1	1	1	1
OG0000694	HOG0000739	74	1	1	1	1	1	1	1	1	1	1	1	1	1	1	1	1	1	1	1	1	1	1	1	1	1	1	1	1	1	1	1	1	1	1	1	1	1	1	1	1	1	1	1	1	1	1	1
OG0000695	HOG0000740	74	1	1	1	1	1	1	1	1	1	1	1	1	1	1	1	1	1	1	1	1	1	1	1	1	1	1	1	1	1	1	1	1	1	1	1	1	1	1	1	1	1	1	1	1	1	1	1
OG0000696	HOG0000741	74	1	1	1	1	1	1	1	1	1	1	1	1	1	1	1	1	1	1	1	1	1	1	1	1	1	1	1	1	1	1	1	1	1	1	1	1	1	1	1	1	1	1	1	1	1	1	1
OG0000697	HOG0000742	74	1	1	1	1	1	1	1	1	1	1	1	1	1	1	1	1	1	1	1	1	1	1	1	1	1	1	1	1	1	1	1	1	1	1	1	1	1	1	1	1	1	1	1	1	1	1	1
OG0000698	HOG0000743	74	1	1	1	1	1	1	1	1	1	1	1	1	1	1	1	1	1	1	1	1	1	1	1	1	1	1	1	1	1	1	1	1	1	1	1	1	1	1	1	1	1	1	1	1	1	1	1
OG0000699	HOG0000744	74	1	1	1	1	1	1	1	1	1	1	1	1	1	1	1	1	1	1	1	1	1	1	1	1	1	1	1	1	1	1	1	1	1	1	1	1	1	1	1	1	1	1	1	1	1	1	1
OG0000700	HOG0000745	74	1	1	1	1	1	1	1	1	1	1	1	1	1	1	1	1	1	1	1	1	1	1	1	1	1	1	1	1	1	1	1	1	1	1	1	1	1	1	1	1	1	1	1	1	1	1	1
OG0000701	HOG0000746	74	1	1	1	1	1	1	1	1	1	1	1	1	1	1	1	1	1	1	1	1	1	1	1	1	1	1	1	1	1	1	1	1	1	1	1	1	1	1	1	1	1	1	1	1	1	1	1
OG0000702	HOG0000747	74	1	1	1	1	1	1	1	1	1	1	1	1	1	1	1	1	1	1	1	1	1	1	1	1	1	1	1	1	1	1	1	1	1	1	1	1	1	1	1	1	1	1	1	1	1	1	1
OG0000703	HOG0000748	74	1	1	1	1	1	1	1	1	1	1	1	1	1	1	1	1	1	1	1	1	1	1	1	1	1	1	1	1	1	1	1	1	1	1	1	1	1	1	1	1	1	1	1	1	1	1	1
OG0000704	HOG0000749	74	1	1	1	1	1	1	1	1	1	1	1	1	1	1	1	1	1	1	1	1	1	1	1	1	1	1	1	1	1	1	1	1	1	1	1	1	1	1	1	1	1	1	1	1	1	1	1
OG0000705	HOG0000750	74	1	1	1	1	1	1	1	1	1	1	1	1	1	1	1	1	1	1	1	1	1	1	1	1	1	1	1	1	1	1	1	1	1	1	1	1	1	1	1	1	1	1	1	1	1	1	1
OG0000706	HOG0000751	74	1	1	1	1	1	1	1	1	1	1	1	1	1	1	1	1	1	1	1	1	1	1	1	1	1	1	1	1	1	1	1	1	1	1	1	1	1	1	1	1	1	1	1	1	1	1	1
OG0000707	HOG0000752	74	1	1	1	1	1	1	1	1	1	1	1	1	1	1	1	1	1	1	1	1	1	1	1	1	1	1	1	1	1	1	1	1	1	1	1	1	1	1	1	1	1	1	1	1	1	1	1
OG0000708	HOG0000753	74	1	1	1	1	1	1	1	1	1	1	1	1	1	1	1	1	1	1	1	1	1	1	1	1	1	1	1	1	1	1	1	1	1	1	1	1	1	1	1	1	1	1	1	1	1	1	1
OG0000709	HOG0000754	74	1	1	1	1	1	1	1	1	1	1	1	1	1	1	1	1	1	1	1	1	1	1	1	1	1	1	1	1	1	1	1	1	1	1	1	1	1	1	1	1	1	1	1	1	1	1	1
OG0000710	HOG0000755	74	1	1	1	1	1	1	1	1	1	1	1	1	1	1	1	1	1	1	1	1	1	1	1	1	1	1	1	1	1	1	1	1	1	1	1	1	1	1	1	1	1	1	1	1	1	1	1
OG0000711	HOG0000756	74	1	1	1	1	1	1	1	1	1	1	1	1	1	1	1	1	1	1	1	1	1	1	1	1	1	1	1	1	1	1	1	1	1	1	1	1	1	1	1	1	1	1	1	1	1	1	1
OG0000712	HOG0000757	74	1	1	1	1	1	1	1	1	1	1	1	1	1	1	1	1	1	1	1	1	1	1	1	1	1	1	1	1	1	1	1	1	1	1	1	1	1	1	1	1	1	1	1	1	1	1	1
OG0000713	HOG0000758	74	1	1	1	1	1	1	1	1	1	1	1	1	1	1	1	1	1	1	1	1	1	1	1	1	1	1	1	1	1	1	1	1	1	1	1	1	1	1	1	1	1	1	1	1	1	1	1
OG0000714	HOG0000759	74	1	1	1	1	1	1	1	1	1	1	1	1	1	1	1	1	1	1	1	1	1	1	1	1	1	1	1	1	1	1	1	1	1	1	1	1	1	1	1	1	1	1	1	1	1	1	1
OG0000715	HOG0000760	74	1	1	1	1	1	1	1	1	1	1	1	1	1	1	1	1	1	1	1	1	1	1	1	1	1	1	1	1	1	1	1	1	1	1	1	1	1	1	1	1	1	1	1	1	1	1	1
OG0000716	HOG0000761	74	1	1	1	1	1	1	1	1	1	1	1	1	1	1	1	1	1	1	1	1	1	1	1	1	1	1	1	1	1	1	1	1	1	1	1	1	1	1	1	1	1	1	1	1	1	1	1
OG0000717	HOG0000762	74	1	1	1	1	1	1	1	1	1	1	1	1	1	1	1	1	1	1	1	1	1	1	1	1	1	1	1	1	1	1	1	1	1	1	1	1	1	1	1	1	1	1	1	1	1	1	1
OG0000718	HOG0000763	74	1	1	1	1	1	1	1	1	1	1	1	1	1	1	1	1	1	1	1	1	1	1	1	1	1	1	1	1	1	1	1	1	1	1	1	1	1	1	1	1	1	1	1	1	1	1	1
OG0000719	HOG0000764	74	1	1	1	1	1	1	1	1	1	1	1	1	1	1	1	1	1	1	1	1	1	1	1	1	1	1	1	1	1	1	1	1	1	1	1	1	1	1	1	1	1	1	1	1	1	1	1
OG0000720	HOG0000765	74	1	1	1	1	1	1	1	1	1	1	1	1	1	1	1	1	1	1	1	1	1	1	1	1	1	1	1	1	1	1	1	1	1	1	1	1	1	1	1	1	1	1	1	1	1	1	1
OG0000721	HOG0000766	74	1	1	1	1	1	1	1	1	1	1	1	1	1	1	1	1	1	1	1	1	1	1	1	1	1	1	1	1	1	1	1	1	1	1	1	1	1	1	1	1	1	1	1	1	1	1	1
OG0000722	HOG0000767	74	1	1	1	1	1	1	1	1	1	1	1	1	1	1	1	1	1	1	1	1	1	1	1	1	1	1	1	1	1	1	1	1	1	1	1	1	1	1	1	1	1	1	1	1	1	1	1
OG0000723	HOG0000768	74	1	1	1	1	1	1	1	1	1	1	1	1	1	1	1	1	1	1	1	1	1	1	1	1	1	1	1	1	1	1	1	1	1	1	1	1	1	1	1	1	1	1	1	1	1	1	1
OG0000724	HOG0000769	74	1	1	1	1	1	1	1	1	1	1	1	1	1	1	1	1	1	1	1	1	1	1	1	1	1	1	1	1	1	1	1	1	1	1	1	1	1	1	1	1	1	1	1	1	1	1	1
OG0000725	HOG0000770	74	1	1	1	1	1	1	1	1	1	1	1	1	1	1	1	1	1	1	1	1	1	1	1	1	1	1	1	1	1	1	1	1	1	1	1	1	1	1	1	1	1	1	1	1	1	1	1
OG0000726	HOG0000771	74	1	1	1	1	1	1	1	1	1	1	1	1	1	1	1	1	1	1	1	1	1	1	1	1	1	1	1	1	1	1	1	1	1	1	1	1	1	1	1	1	1	1	1	1	1	1	1
OG0000727	HOG0000772	74	1	1	1	1	1	1	1	1	1	1	1	1	1	1	1	1	1	1	1	1	1	1	1	1	1	1	1	1	1	1	1	1	1	1	1	1	1	1	1	1	1	1	1	1	1	1	1
OG0000728	HOG0000773	74	1	1	1	1	1	1	1	1	1	1	1	1	1	1	1	1	1	1	1	1	1	1	1	1	1	1	1	1	1	1	1	1	1	1	1	1	1	1	1	1	1	1	1	1	1	1	1
OG0000729	HOG0000774	74	1	1	1	1	1	1	1	1	1	1	1	1	1	1	1	1	1	1	1	1	1	1	1	1	1	1	1	1	1	1	1	1	1	1	1	1	1	1	1	1	1	1	1	1	1	1	1
OG0000730	HOG0000775	74	1	1	1	1	1	1	1	1	1	1	1	1	1	1	1	1	1	1	1	1	1	1	1	1	1	1	1	1	1	1	1	1	1	1	1	1	1	1	1	1	1	1	1	1	1	1	1
OG0000731	HOG0000776	74	1	1	1	1	1	1	1	1	1	1	1	1	1	1	1	1	1	1	1	1	1	1	1	1	1	1	1	1	1	1	1	1	1	1	1	1	1	1	1	1	1	1	1	1	1	1	1
OG0000732	HOG0000777	74	1	1	1	1	1	1	1	1	1	1	1	1	1	1	1	1	1	1	1	1	1	1	1	1	1	1	1	1	1	1	1	1	1	1	1	1	1	1	1	1	1	1	1	1	1	1	1
OG0000733	HOG0000778	74	1	1	1	1	1	1	1	1	1	1	1	1	1	1	1	1	1	1	1	1	1	1	1	1	1	1	1	1	1	1	1	1	1	1	1	1	1	1	1	1	1	1	1	1	1	1	1
OG0000734	HOG0000779	74	1	1	1	1	1	1	1	1	1	1	1	1	1	1	1	1	1	1	1	1	1	1	1	1	1	1	1	1	1	1	1	1	1	1	1	1	1	1	1	1	1	1	1	1	1	1	1
OG0000735	HOG0000780	74	1	1	1	1	1	1	1	1	1	1	1	1	1	1	1	1	1	1	1	1	1	1	1	1	1	1	1	1	1	1	1	1	1	1	1	1	1	1	1	1	1	1	1	1	1	1	1
OG0000736	HOG0000781	74	1	1	1	1	1	1	1	1	1	1	1	1	1	1	1	1	1	1	1	1	1	1	1	1	1	1	1	1	1	1	1	1	1	1	1	1	1	1	1	1	1	1	1	1	1	1	1
OG0000737	HOG0000782	74	1	1	1	1	1	1	1	1	1	1	1	1	1	1	1	1	1	1	1	1	1	1	1	1	1	1	1	1	1	1	1	1	1	1	1	1	1	1	1	1	1	1	1	1	1	1	1
OG0000738	HOG0000783	74	1	1	1	1	1	1	1	1	1	1	1	1	1	1	1	1	1	1	1	1	1	1	1	1	1	1	1	1	1	1	1	1	1	1	1	1	1	1	1	1	1	1	1	1	1	1	1
OG0000739	HOG0000784	74	1	1	1	1	1	1	1	1	1	1	1	1	1	1	1	1	1	1	1	1	1	1	1	1	1	1	1	1	1	1	1	1	1	1	1	1	1	1	1	1	1	1	1	1	1	1	1
OG0000740	HOG0000785	74	1	1	1	1	1	1	1	1	1	1	1	1	1	1	1	1	1	1	1	1	1	1	1	1	1	1	1	1	1	1	1	1	1	1	1	1	1	1	1	1	1	1	1	1	1	1	1
OG0000741	HOG0000786	74	1	1	1	1	1	1	1	1	1	1	1	1	1	1	1	1	1	1	1	1	1	1	1	1	1	1	1	1	1	1	1	1	1	1	1	1	1	1	1	1	1	1	1	1	1	1	1
OG0000742	HOG0000787	74	1	1	1	1	1	1	1	1	1	1	1	1	1	1	1	1	1	1	1	1	1	1	1	1	1	1	1	1	1	1	1	1	1	1	1	1	1	1	1	1	1	1	1	1	1	1	1
OG0000743	HOG0000788	74	1	1	1	1	1	1	1	1	1	1	1	1	1	1	1	1	1	1	1	1	1	1	1	1	1	1	1	1	1	1	1	1	1	1	1	1	1	1	1	1	1	1	1	1	1	1	1
OG0000744	HOG0000789	74	1	1	1	1	1	1	1	1	1	1	1	1	1	1	1	1	1	1	1	1	1	1	1	1	1	1	1	1	1	1	1	1	1	1	1	1	1	1	1	1	1	1	1	1	1	1	1
OG0000745	HOG0000790	74	1	1	1	1	1	1	1	1	1	1	1	1	1	1	1	1	1	1	1	1	1	1	1	1	1	1	1	1	1	1	1	1	1	1	1	1	1	1	1	1	1	1	1	1	1	1	1
OG0000746	HOG0000791	74	1	1	1	1	1	1	1	1	1	1	1	1	1	1	1	1	1	1	1	1	1	1	1	1	1	1	1	1	1	1	1	1	1	1	1	1	1	1	1	1	1	1	1	1	1	1	1
OG0000747	HOG0000792	74	1	1	1	1	1	1	1	1	1	1	1	1	1	1	1	1	1	1	1	1	1	1	1	1	1	1	1	1	1	1	1	1	1	1	1	1	1	1	1	1	1	1	1	1	1	1	1
OG0000748	HOG0000793	74	1	1	1	1	1	1	1	1	1	1	1	1	1	1	1	1	1	1	1	1	1	1	1	1	1	1	1	1	1	1	1	1	1	1	1	1	1	1	1	1	1	1	1	1	1	1	1
OG0000749	HOG0000794	74	1	1	1	1	1	1	1	1	1	1	1	1	1	1	1	1	1	1	1	1	1	1	1	1	1	1	1	1	1	1	1	1	1	1	1	1	1	1	1	1	1	1	1	1	1	1	1
OG0000750	HOG0000795	74	1	1	1	1	1	1	1	1	1	1	1	1	1	1	1	1	1	1	1	1	1	1	1	1	1	1	1	1	1	1	1	1	1	1	1	1	1	1	1	1	1	1	1	1	1	1	1
OG0000751	HOG0000796	74	1	1	1	1	1	1	1	1	1	1	1	1	1	1	1	1	1	1	1	1	1	1	1	1	1	1	1	1	1	1	1	1	1	1	1	1	1	1	1	1	1	1	1	1	1	1	1
OG0000752	HOG0000797	74	1	1	1	1	1	1	1	1	1	1	1	1	1	1	1	1	1	1	1	1	1	1	1	1	1	1	1	1	1	1	1	1	1	1	1	1	1	1	1	1	1	1	1	1	1	1	1
OG0000753	HOG0000798	74	1	1	1	1	1	1	1	1	1	1	1	1	1	1	1	1	1	1	1	1	1	1	1	1	1	1	1	1	1	1	1	1	1	1	1	1	1	1	1	1	1	1	1	1	1	1	1
OG0000754	HOG0000799	74	1	1	1	1	1	1	1	1	1	1	1	1	1	1	1	1	1	1	1	1	1	1	1	1	1	1	1	1	1	1	1	1	1	1	1	1	1	1	1	1	1	1	1	1	1	1	1
OG0000755	HOG0000800	74	1	1	1	1	1	1	1	1	1	1	1	1	1	1	1	1	1	1	1	1	1	1	1	1	1	1	1	1	1	1	1	1	1	1	1	1	1	1	1	1	1	1	1	1	1	1	1
OG0000756	HOG0000801	74	1	1	1	1	1	1	1	1	1	1	1	1	1	1	1	1	1	1	1	1	1	1	1	1	1	1	1	1	1	1	1	1	1	1	1	1	1	1	1	1	1	1	1	1	1	1	1
OG0000757	HOG0000802	74	1	1	1	1	1	1	1	1	1	1	1	1	1	1	1	1	1	1	1	1	1	1	1	1	1	1	1	1	1	1	1	1	1	1	1	1	1	1	1	1	1	1	1	1	1	1	1
OG0000758	HOG0000803	74	1	1	1	1	1	1	1	1	1	1	1	1	1	1	1	1	1	1	1	1	1	1	1	1	1	1	1	1	1	1	1	1	1	1	1	1	1	1	1	1	1	1	1	1	1	1	1
OG0000759	HOG0000804	74	1	1	1	1	1	1	1	1	1	1	1	1	1	1	1	1	1	1	1	1	1	1	1	1	1	1	1	1	1	1	1	1	1	1	1	1	1	1	1	1	1	1	1	1	1	1	1
OG0000760	HOG0000805	74	1	1	1	1	1	1	1	1	1	1	1	1	1	1	1	1	1	1	1	1	1	1	1	1	1	1	1	1	1	1	1	1	1	1	1	1	1	1	1	1	1	1	1	1	1	1	1
OG0000761	HOG0000806	74	1	1	1	1	1	1	1	1	1	1	1	1	1	1	1	1	1	1	1	1	1	1	1	1	1	1	1	1	1	1	1	1	1	1	1	1	1	1	1	1	1	1	1	1	1	1	1
OG0000762	HOG0000807	74	1	1	1	1	1	1	1	1	1	1	1	1	1	1	1	1	1	1	1	1	1	1	1	1	1	1	1	1	1	1	1	1	1	1	1	1	1	1	1	1	1	1	1	1	1	1	1
OG0000763	HOG0000808	74	1	1	1	1	1	1	1	1	1	1	1	1	1	1	1	1	1	1	1	1	1	1	1	1	1	1	1	1	1	1	1	1	1	1	1	1	1	1	1	1	1	1	1	1	1	1	1
OG0000764	HOG0000809	74	1	1	1	1	1	1	1	1	1	1	1	1	1	1	1	1	1	1	1	1	1	1	1	1	1	1	1	1	1	1	1	1	1	1	1	1	1	1	1	1	1	1	1	1	1	1	1
OG0000765	HOG0000810	74	1	1	1	1	1	1	1	1	1	1	1	1	1	1	1	1	1	1	1	1	1	1	1	1	1	1	1	1	1	1	1	1	1	1	1	1	1	1	1	1	1	1	1	1	1	1	1
OG0000766	HOG0000811	74	1	1	1	1	1	1	1	1	1	1	1	1	1	1	1	1	1	1	1	1	1	1	1	1	1	1	1	1	1	1	1	1	1	1	1	1	1	1	1	1	1	1	1	1	1	1	1
OG0000767	HOG0000812	74	1	1	1	1	1	1	1	1	1	1	1	1	1	1	1	1	1	1	1	1	1	1	1	1	1	1	1	1	1	1	1	1	1	1	1	1	1	1	1	1	1	1	1	1	1	1	1
OG0000768	HOG0000813	74	1	1	1	1	1	1	1	1	1	1	1	1	1	1	1	1	1	1	1	1	1	1	1	1	1	1	1	1	1	1	1	1	1	1	1	1	1	1	1	1	1	1	1	1	1	1	1
OG0000769	HOG0000814	74	1	1	1	1	1	1	1	1	1	1	1	1	1	1	1	1	1	1	1	1	1	1	1	1	1	1	1	1	1	1	1	1	1	1	1	1	1	1	1	1	1	1	1	1	1	1	1
OG0000770	HOG0000815	74	1	1	1	1	1	1	1	1	1	1	1	1	1	1	1	1	1	1	1	1	1	1	1	1	1	1	1	1	1	1	1	1	1	1	1	1	1	1	1	1	1	1	1	1	1	1	1
OG0000771	HOG0000816	74	1	1	1	1	1	1	1	1	1	1	1	1	1	1	1	1	1	1	1	1	1	1	1	1	1	1	1	1	1	1	1	1	1	1	1	1	1	1	1	1	1	1	1	1	1	1	1
OG0000772	HOG0000817	74	1	1	1	1	1	1	1	1	1	1	1	1	1	1	1	1	1	1	1	1	1	1	1	1	1	1	1	1	1	1	1	1	1	1	1	1	1	1	1	1	1	1	1	1	1	1	1
OG0000773	HOG0000818	74	1	1	1	1	1	1	1	1	1	1	1	1	1	1	1	1	1	1	1	1	1	1	1	1	1	1	1	1	1	1	1	1	1	1	1	1	1	1	1	1	1	1	1	1	1	1	1
OG0000774	HOG0000819	74	1	1	1	1	1	1	1	1	1	1	1	1	1	1	1	1	1	1	1	1	1	1	1	1	1	1	1	1	1	1	1	1	1	1	1	1	1	1	1	1	1	1	1	1	1	1	1
OG0000775	HOG0000820	74	1	1	1	1	1	1	1	1	1	1	1	1	1	1	1	1	1	1	1	1	1	1	1	1	1	1	1	1	1	1	1	1	1	1	1	1	1	1	1	1	1	1	1	1	1	1	1
OG0000776	HOG0000821	74	1	1	1	1	1	1	1	1	1	1	1	1	1	1	1	1	1	1	1	1	1	1	1	1	1	1	1	1	1	1	1	1	1	1	1	1	1	1	1	1	1	1	1	1	1	1	1
OG0000777	HOG0000822	74	1	1	1	1	1	1	1	1	1	1	1	1	1	1	1	1	1	1	1	1	1	1	1	1	1	1	1	1	1	1	1	1	1	1	1	1	1	1	1	1	1	1	1	1	1	1	1
OG0000778	HOG0000823	74	1	1	1	1	1	1	1	1	1	1	1	1	1	1	1	1	1	1	1	1	1	1	1	1	1	1	1	1	1	1	1	1	1	1	1	1	1	1	1	1	1	1	1	1	1	1	1
OG0000779	HOG0000824	74	1	1	1	1	1	1	1	1	1	1	1	1	1	1	1	1	1	1	1	1	1	1	1	1	1	1	1	1	1	1	1	1	1	1	1	1	1	1	1	1	1	1	1	1	1	1	1
OG0000780	HOG0000825	74	1	1	1	1	1	1	1	1	1	1	1	1	1	1	1	1	1	1	1	1	1	1	1	1	1	1	1	1	1	1	1	1	1	1	1	1	1	1	1	1	1	1	1	1	1	1	1
OG0000781	HOG0000826	74	1	1	1	1	1	1	1	1	1	1	1	1	1	1	1	1	1	1	1	1	1	1	1	1	1	1	1	1	1	1	1	1	1	1	1	1	1	1	1	1	1	1	1	1	1	1	1
OG0000782	HOG0000827	74	1	1	1	1	1	1	1	1	1	1	1	1	1	1	1	1	1	1	1	1	1	1	1	1	1	1	1	1	1	1	1	1	1	1	1	1	1	1	1	1	1	1	1	1	1	1	1
OG0000783	HOG0000828	74	1	1	1	1	1	1	1	1	1	1	1	1	1	1	1	1	1	1	1	1	1	1	1	1	1	1	1	1	1	1	1	1	1	1	1	1	1	1	1	1	1	1	1	1	1	1	1
OG0000784	HOG0000829	74	1	1	1	1	1	1	1	1	1	1	1	1	1	1	1	1	1	1	1	1	1	1	1	1	1	1	1	1	1	1	1	1	1	1	1	1	1	1	1	1	1	1	1	1	1	1	1
OG0000785	HOG0000830	74	1	1	1	1	1	1	1	1	1	1	1	1	1	1	1	1	1	1	1	1	1	1	1	1	1	1	1	1	1	1	1	1	1	1	1	1	1	1	1	1	1	1	1	1	1	1	1
OG0000786	HOG0000831	74	1	1	1	1	1	1	1	1	1	1	1	1	1	1	1	1	1	1	1	1	1	1	1	1	1	1	1	1	1	1	1	1	1	1	1	1	1	1	1	1	1	1	1	1	1	1	1
OG0000787	HOG0000832	74	1	1	1	1	1	1	1	1	1	1	1	1	1	1	1	1	1	1	1	1	1	1	1	1	1	1	1	1	1	1	1	1	1	1	1	1	1	1	1	1	1	1	1	1	1	1	1
OG0000788	HOG0000833	74	1	1	1	1	1	1	1	1	1	1	1	1	1	1	1	1	1	1	1	1	1	1	1	1	1	1	1	1	1	1	1	1	1	1	1	1	1	1	1	1	1	1	1	1	1	1	1
OG0000789	HOG0000834	74	1	1	1	1	1	1	1	1	1	1	1	1	1	1	1	1	1	1	1	1	1	1	1	1	1	1	1	1	1	1	1	1	1	1	1	1	1	1	1	1	1	1	1	1	1	1	1
OG0000790	HOG0000835	74	1	1	1	1	1	1	1	1	1	1	1	1	1	1	1	1	1	1	1	1	1	1	1	1	1	1	1	1	1	1	1	1	1	1	1	1	1	1	1	1	1	1	1	1	1	1	1
OG0000791	HOG0000836	74	1	1	1	1	1	1	1	1	1	1	1	1	1	1	1	1	1	1	1	1	1	1	1	1	1	1	1	1	1	1	1	1	1	1	1	1	1	1	1	1	1	1	1	1	1	1	1
OG0000792	HOG0000837	74	1	1	1	1	1	1	1	1	1	1	1	1	1	1	1	1	1	1	1	1	1	1	1	1	1	1	1	1	1	1	1	1	1	1	1	1	1	1	1	1	1	1	1	1	1	1	1
OG0000793	HOG0000838	74	1	1	1	1	1	1	1	1	1	1	1	1	1	1	1	1	1	1	1	1	1	1	1	1	1	1	1	1	1	1	1	1	1	1	1	1	1	1	1	1	1	1	1	1	1	1	1
OG0000794	HOG0000839	74	1	1	1	1	1	1	1	1	1	1	1	1	1	1	1	1	1	1	1	1	1	1	1	1	1	1	1	1	1	1	1	1	1	1	1	1	1	1	1	1	1	1	1	1	1	1	1
OG0000795	HOG0000840	74	1	1	1	1	1	1	1	1	1	1	1	1	1	1	1	1	1	1	1	1	1	1	1	1	1	1	1	1	1	1	1	1	1	1	1	1	1	1	1	1	1	1	1	1	1	1	1
OG0000796	HOG0000841	74	1	1	1	1	1	1	1	1	1	1	1	1	1	1	1	1	1	1	1	1	1	1	1	1	1	1	1	1	1	1	1	1	1	1	1	1	1	1	1	1	1	1	1	1	1	1	1
OG0000797	HOG0000842	74	1	1	1	1	1	1	1	1	1	1	1	1	1	1	1	1	1	1	1	1	1	1	1	1	1	1	1	1	1	1	1	1	1	1	1	1	1	1	1	1	1	1	1	1	1	1	1
OG0000798	HOG0000843	74	1	1	1	1	1	1	1	1	1	1	1	1	1	1	1	1	1	1	1	1	1	1	1	1	1	1	1	1	1	1	1	1	1	1	1	1	1	1	1	1	1	1	1	1	1	1	1
OG0000799	HOG0000844	74	1	1	1	1	1	1	1	1	1	1	1	1	1	1	1	1	1	1	1	1	1	1	1	1	1	1	1	1	1	1	1	1	1	1	1	1	1	1	1	1	1	1	1	1	1	1	1
OG0000800	HOG0000845	74	1	1	1	1	1	1	1	1	1	1	1	1	1	1	1	1	1	1	1	1	1	1	1	1	1	1	1	1	1	1	1	1	1	1	1	1	1	1	1	1	1	1	1	1	1	1	1
OG0000801	HOG0000846	74	1	1	1	1	1	1	1	1	1	1	1	1	1	1	1	1	1	1	1	1	1	1	1	1	1	1	1	1	1	1	1	1	1	1	1	1	1	1	1	1	1	1	1	1	1	1	1
OG0000802	HOG0000847	74	1	1	1	1	1	1	1	1	1	1	1	1	1	1	1	1	1	1	1	1	1	1	1	1	1	1	1	1	1	1	1	1	1	1	1	1	1	1	1	1	1	1	1	1	1	1	1
OG0000803	HOG0000848	74	1	1	1	1	1	1	1	1	1	1	1	1	1	1	1	1	1	1	1	1	1	1	1	1	1	1	1	1	1	1	1	1	1	1	1	1	1	1	1	1	1	1	1	1	1	1	1
OG0000804	HOG0000849	74	1	1	1	1	1	1	1	1	1	1	1	1	1	1	1	1	1	1	1	1	1	1	1	1	1	1	1	1	1	1	1	1	1	1	1	1	1	1	1	1	1	1	1	1	1	1	1
OG0000805	HOG0000850	74	1	1	1	1	1	1	1	1	1	1	1	1	1	1	1	1	1	1	1	1	1	1	1	1	1	1	1	1	1	1	1	1	1	1	1	1	1	1	1	1	1	1	1	1	1	1	1
OG0000806	HOG0000851	74	1	1	1	1	1	1	1	1	1	1	1	1	1	1	1	1	1	1	1	1	1	1	1	1	1	1	1	1	1	1	1	1	1	1	1	1	1	1	1	1	1	1	1	1	1	1	1
OG0000807	HOG0000852	74	1	1	1	1	1	1	1	1	1	1	1	1	1	1	1	1	1	1	1	1	1	1	1	1	1	1	1	1	1	1	1	1	1	1	1	1	1	1	1	1	1	1	1	1	1	1	1
OG0000808	HOG0000853	74	1	1	1	1	1	1	1	1	1	1	1	1	1	1	1	1	1	1	1	1	1	1	1	1	1	1	1	1	1	1	1	1	1	1	1	1	1	1	1	1	1	1	1	1	1	1	1
OG0000809	HOG0000854	74	1	1	1	1	1	1	1	1	1	1	1	1	1	1	1	1	1	1	1	1	1	1	1	1	1	1	1	1	1	1	1	1	1	1	1	1	1	1	1	1	1	1	1	1	1	1	1
OG0000810	HOG0000855	74	1	1	1	1	1	1	1	1	1	1	1	1	1	1	1	1	1	1	1	1	1	1	1	1	1	1	1	1	1	1	1	1	1	1	1	1	1	1	1	1	1	1	1	1	1	1	1
OG0000811	HOG0000856	74	1	1	1	1	1	1	1	1	1	1	1	1	1	1	1	1	1	1	1	1	1	1	1	1	1	1	1	1	1	1	1	1	1	1	1	1	1	1	1	1	1	1	1	1	1	1	1
OG0000812	HOG0000857	74	1	1	1	1	1	1	1	1	1	1	1	1	1	1	1	1	1	1	1	1	1	1	1	1	1	1	1	1	1	1	1	1	1	1	1	1	1	1	1	1	1	1	1	1	1	1	1
OG0000813	HOG0000858	74	1	1	1	1	1	1	1	1	1	1	1	1	1	1	1	1	1	1	1	1	1	1	1	1	1	1	1	1	1	1	1	1	1	1	1	1	1	1	1	1	1	1	1	1	1	1	1
OG0000814	HOG0000859	74	1	1	1	1	1	1	1	1	1	1	1	1	1	1	1	1	1	1	1	1	1	1	1	1	1	1	1	1	1	1	1	1	1	1	1	1	1	1	1	1	1	1	1	1	1	1	1
OG0000815	HOG0000860	74	1	1	1	1	1	1	1	1	1	1	1	1	1	1	1	1	1	1	1	1	1	1	1	1	1	1	1	1	1	1	1	1	1	1	1	1	1	1	1	1	1	1	1	1	1	1	1
OG0000816	HOG0000861	74	1	1	1	1	1	1	1	1	1	1	1	1	1	1	1	1	1	1	1	1	1	1	1	1	1	1	1	1	1	1	1	1	1	1	1	1	1	1	1	1	1	1	1	1	1	1	1
OG0000817	HOG0000862	74	1	1	1	1	1	1	1	1	1	1	1	1	1	1	1	1	1	1	1	1	1	1	1	1	1	1	1	1	1	1	1	1	1	1	1	1	1	1	1	1	1	1	1	1	1	1	1
OG0000818	HOG0000863	74	1	1	1	1	1	1	1	1	1	1	1	1	1	1	1	1	1	1	1	1	1	1	1	1	1	1	1	1	1	1	1	1	1	1	1	1	1	1	1	1	1	1	1	1	1	1	1
OG0000819	HOG0000864	74	1	1	1	1	1	1	1	1	1	1	1	1	1	1	1	1	1	1	1	1	1	1	1	1	1	1	1	1	1	1	1	1	1	1	1	1	1	1	1	1	1	1	1	1	1	1	1
OG0000820	HOG0000865	74	1	1	1	1	1	1	1	1	1	1	1	1	1	1	1	1	1	1	1	1	1	1	1	1	1	1	1	1	1	1	1	1	1	1	1	1	1	1	1	1	1	1	1	1	1	1	1
OG0000821	HOG0000866	74	1	1	1	1	1	1	1	1	1	1	1	1	1	1	1	1	1	1	1	1	1	1	1	1	1	1	1	1	1	1	1	1	1	1	1	1	1	1	1	1	1	1	1	1	1	1	1
OG0000822	HOG0000867	74	1	1	1	1	1	1	1	1	1	1	1	1	1	1	1	1	1	1	1	1	1	1	1	1	1	1	1	1	1	1	1	1	1	1	1	1	1	1	1	1	1	1	1	1	1	1	1
OG0000823	HOG0000868	74	1	1	1	1	1	1	1	1	1	1	1	1	1	1	1	1	1	1	1	1	1	1	1	1	1	1	1	1	1	1	1	1	1	1	1	1	1	1	1	1	1	1	1	1	1	1	1
OG0000824	HOG0000869	74	1	1	1	1	1	1	1	1	1	1	1	1	1	1	1	1	1	1	1	1	1	1	1	1	1	1	1	1	1	1	1	1	1	1	1	1	1	1	1	1	1	1	1	1	1	1	1
OG0000825	HOG0000870	74	1	1	1	1	1	1	1	1	1	1	1	1	1	1	1	1	1	1	1	1	1	1	1	1	1	1	1	1	1	1	1	1	1	1	1	1	1	1	1	1	1	1	1	1	1	1	1
OG0000826	HOG0000871	74	1	1	1	1	1	1	1	1	1	1	1	1	1	1	1	1	1	1	1	1	1	1	1	1	1	1	1	1	1	1	1	1	1	1	1	1	1	1	1	1	1	1	1	1	1	1	1
OG0000827	HOG0000872	74	1	1	1	1	1	1	1	1	1	1	1	1	1	1	1	1	1	1	1	1	1	1	1	1	1	1	1	1	1	1	1	1	1	1	1	1	1	1	1	1	1	1	1	1	1	1	1
OG0000828	HOG0000873	74	1	1	1	1	1	1	1	1	1	1	1	1	1	1	1	1	1	1	1	1	1	1	1	1	1	1	1	1	1	1	1	1	1	1	1	1	1	1	1	1	1	1	1	1	1	1	1
OG0000829	HOG0000874	74	1	1	1	1	1	1	1	1	1	1	1	1	1	1	1	1	1	1	1	1	1	1	1	1	1	1	1	1	1	1	1	1	1	1	1	1	1	1	1	1	1	1	1	1	1	1	1
OG0000830	HOG0000875	74	1	1	1	1	1	1	1	1	1	1	1	1	1	1	1	1	1	1	1	1	1	1	1	1	1	1	1	1	1	1	1	1	1	1	1	1	1	1	1	1	1	1	1	1	1	1	1
OG0000831	HOG0000876	74	1	1	1	1	1	1	1	1	1	1	1	1	1	1	1	1	1	1	1	1	1	1	1	1	1	1	1	1	1	1	1	1	1	1	1	1	1	1	1	1	1	1	1	1	1	1	1
OG0000832	HOG0000877	74	1	1	1	1	1	1	1	1	1	1	1	1	1	1	1	1	1	1	1	1	1	1	1	1	1	1	1	1	1	1	1	1	1	1	1	1	1	1	1	1	1	1	1	1	1	1	1
OG0000833	HOG0000878	74	1	1	1	1	1	1	1	1	1	1	1	1	1	1	1	1	1	1	1	1	1	1	1	1	1	1	1	1	1	1	1	1	1	1	1	1	1	1	1	1	1	1	1	1	1	1	1
OG0000834	HOG0000879	74	1	1	1	1	1	1	1	1	1	1	1	1	1	1	1	1	1	1	1	1	1	1	1	1	1	1	1	1	1	1	1	1	1	1	1	1	1	1	1	1	1	1	1	1	1	1	1
OG0000835	HOG0000880	74	1	1	1	1	1	1	1	1	1	1	1	1	1	1	1	1	1	1	1	1	1	1	1	1	1	1	1	1	1	1	1	1	1	1	1	1	1	1	1	1	1	1	1	1	1	1	1
OG0000836	HOG0000881	74	1	1	1	1	1	1	1	1	1	1	1	1	1	1	1	1	1	1	1	1	1	1	1	1	1	1	1	1	1	1	1	1	1	1	1	1	1	1	1	1	1	1	1	1	1	1	1
OG0000837	HOG0000882	74	1	1	1	1	1	1	1	1	1	1	1	1	1	1	1	1	1	1	1	1	1	1	1	1	1	1	1	1	1	1	1	1	1	1	1	1	1	1	1	1	1	1	1	1	1	1	1
OG0000838	HOG0000883	74	1	1	1	1	1	1	1	1	1	1	1	1	1	1	1	1	1	1	1	1	1	1	1	1	1	1	1	1	1	1	1	1	1	1	1	1	1	1	1	1	1	1	1	1	1	1	1
OG0000839	HOG0000884	74	1	1	1	1	1	1	1	1	1	1	1	1	1	1	1	1	1	1	1	1	1	1	1	1	1	1	1	1	1	1	1	1	1	1	1	1	1	1	1	1	1	1	1	1	1	1	1
OG0000840	HOG0000885	74	1	1	1	1	1	1	1	1	1	1	1	1	1	1	1	1	1	1	1	1	1	1	1	1	1	1	1	1	1	1	1	1	1	1	1	1	1	1	1	1	1	1	1	1	1	1	1
OG0000841	HOG0000886	74	1	1	1	1	1	1	1	1	1	1	1	1	1	1	1	1	1	1	1	1	1	1	1	1	1	1	1	1	1	1	1	1	1	1	1	1	1	1	1	1	1	1	1	1	1	1	1
OG0000842	HOG0000887	74	1	1	1	1	1	1	1	1	1	1	1	1	1	1	1	1	1	1	1	1	1	1	1	1	1	1	1	1	1	1	1	1	1	1	1	1	1	1	1	1	1	1	1	1	1	1	1
OG0000843	HOG0000888	74	1	1	1	1	1	1	1	1	1	1	1	1	1	1	1	1	1	1	1	1	1	1	1	1	1	1	1	1	1	1	1	1	1	1	1	1	1	1	1	1	1	1	1	1	1	1	1
OG0000844	HOG0000889	74	1	1	1	1	1	1	1	1	1	1	1	1	1	1	1	1	1	1	1	1	1	1	1	1	1	1	1	1	1	1	1	1	1	1	1	1	1	1	1	1	1	1	1	1	1	1	1
OG0000845	HOG0000890	74	1	1	1	1	1	1	1	1	1	1	1	1	1	1	1	1	1	1	1	1	1	1	1	1	1	1	1	1	1	1	1	1	1	1	1	1	1	1	1	1	1	1	1	1	1	1	1
OG0000846	HOG0000891	74	1	1	1	1	1	1	1	1	1	1	1	1	1	1	1	1	1	1	1	1	1	1	1	1	1	1	1	1	1	1	1	1	1	1	1	1	1	1	1	1	1	1	1	1	1	1	1
OG0000847	HOG0000892	74	1	1	1	1	1	1	1	1	1	1	1	1	1	1	1	1	1	1	1	1	1	1	1	1	1	1	1	1	1	1	1	1	1	1	1	1	1	1	1	1	1	1	1	1	1	1	1
OG0000848	HOG0000893	74	1	1	1	1	1	1	1	1	1	1	1	1	1	1	1	1	1	1	1	1	1	1	1	1	1	1	1	1	1	1	1	1	1	1	1	1	1	1	1	1	1	1	1	1	1	1	1
OG0000849	HOG0000894	74	1	1	1	1	1	1	1	1	1	1	1	1	1	1	1	1	1	1	1	1	1	1	1	1	1	1	1	1	1	1	1	1	1	1	1	1	1	1	1	1	1	1	1	1	1	1	1
OG0000850	HOG0000895	74	1	1	1	1	1	1	1	1	1	1	1	1	1	1	1	1	1	1	1	1	1	1	1	1	1	1	1	1	1	1	1	1	1	1	1	1	1	1	1	1	1	1	1	1	1	1	1
OG0000851	HOG0000896	74	1	1	1	1	1	1	1	1	1	1	1	1	1	1	1	1	1	1	1	1	1	1	1	1	1	1	1	1	1	1	1	1	1	1	1	1	1	1	1	1	1	1	1	1	1	1	1
OG0000852	HOG0000897	74	1	1	1	1	1	1	1	1	1	1	1	1	1	1	1	1	1	1	1	1	1	1	1	1	1	1	1	1	1	1	1	1	1	1	1	1	1	1	1	1	1	1	1	1	1	1	1
OG0000853	HOG0000898	74	1	1	1	1	1	1	1	1	1	1	1	1	1	1	1	1	1	1	1	1	1	1	1	1	1	1	1	1	1	1	1	1	1	1	1	1	1	1	1	1	1	1	1	1	1	1	1
OG0000854	HOG0000899	74	1	1	1	1	1	1	1	1	1	1	1	1	1	1	1	1	1	1	1	1	1	1	1	1	1	1	1	1	1	1	1	1	1	1	1	1	1	1	1	1	1	1	1	1	1	1	1
OG0000855	HOG0000900	74	1	1	1	1	1	1	1	1	1	1	1	1	1	1	1	1	1	1	1	1	1	1	1	1	1	1	1	1	1	1	1	1	1	1	1	1	1	1	1	1	1	1	1	1	1	1	1
OG0000856	HOG0000901	74	1	1	1	1	1	1	1	1	1	1	1	1	1	1	1	1	1	1	1	1	1	1	1	1	1	1	1	1	1	1	1	1	1	1	1	1	1	1	1	1	1	1	1	1	1	1	1
OG0000857	HOG0000902	74	1	1	1	1	1	1	1	1	1	1	1	1	1	1	1	1	1	1	1	1	1	1	1	1	1	1	1	1	1	1	1	1	1	1	1	1	1	1	1	1	1	1	1	1	1	1	1
OG0000858	HOG0000903	74	1	1	1	1	1	1	1	1	1	1	1	1	1	1	1	1	1	1	1	1	1	1	1	1	1	1	1	1	1	1	1	1	1	1	1	1	1	1	1	1	1	1	1	1	1	1	1
OG0000859	HOG0000904	74	1	1	1	1	1	1	1	1	1	1	1	1	1	1	1	1	1	1	1	1	1	1	1	1	1	1	1	1	1	1	1	1	1	1	1	1	1	1	1	1	1	1	1	1	1	1	1
OG0000860	HOG0000905	74	1	1	1	1	1	1	1	1	1	1	1	1	1	1	1	1	1	1	1	1	1	1	1	1	1	1	1	1	1	1	1	1	1	1	1	1	1	1	1	1	1	1	1	1	1	1	1
OG0000861	HOG0000906	74	1	1	1	1	1	1	1	1	1	1	1	1	1	1	1	1	1	1	1	1	1	1	1	1	1	1	1	1	1	1	1	1	1	1	1	1	1	1	1	1	1	1	1	1	1	1	1
OG0000862	HOG0000907	74	1	1	1	1	1	1	1	1	1	1	1	1	1	1	1	1	1	1	1	1	1	1	1	1	1	1	1	1	1	1	1	1	1	1	1	1	1	1	1	1	1	1	1	1	1	1	1
OG0000863	HOG0000908	74	1	1	1	1	1	1	1	1	1	1	1	1	1	1	1	1	1	1	1	1	1	1	1	1	1	1	1	1	1	1	1	1	1	1	1	1	1	1	1	1	1	1	1	1	1	1	1
OG0000864	HOG0000909	74	1	1	1	1	1	1	1	1	1	1	1	1	1	1	1	1	1	1	1	1	1	1	1	1	1	1	1	1	1	1	1	1	1	1	1	1	1	1	1	1	1	1	1	1	1	1	1
OG0000865	HOG0000910	74	1	1	1	1	1	1	1	1	1	1	1	1	1	1	1	1	1	1	1	1	1	1	1	1	1	1	1	1	1	1	1	1	1	1	1	1	1	1	1	1	1	1	1	1	1	1	1
OG0000866	HOG0000911	74	1	1	1	1	1	1	1	1	1	1	1	1	1	1	1	1	1	1	1	1	1	1	1	1	1	1	1	1	1	1	1	1	1	1	1	1	1	1	1	1	1	1	1	1	1	1	1
OG0000867	HOG0000912	74	1	1	1	1	1	1	1	1	1	1	1	1	1	1	1	1	1	1	1	1	1	1	1	1	1	1	1	1	1	1	1	1	1	1	1	1	1	1	1	1	1	1	1	1	1	1	1
OG0000868	HOG0000913	74	1	1	1	1	1	1	1	1	1	1	1	1	1	1	1	1	1	1	1	1	1	1	1	1	1	1	1	1	1	1	1	1	1	1	1	1	1	1	1	1	1	1	1	1	1	1	1
OG0000869	HOG0000914	74	1	1	1	1	1	1	1	1	1	1	1	1	1	1	1	1	1	1	1	1	1	1	1	1	1	1	1	1	1	1	1	1	1	1	1	1	1	1	1	1	1	1	1	1	1	1	1
OG0000870	HOG0000915	74	1	1	1	1	1	1	1	1	1	1	1	1	1	1	1	1	1	1	1	1	1	1	1	1	1	1	1	1	1	1	1	1	1	1	1	1	1	1	1	1	1	1	1	1	1	1	1
OG0000871	HOG0000916	74	1	1	1	1	1	1	1	1	1	1	1	1	1	1	1	1	1	1	1	1	1	1	1	1	1	1	1	1	1	1	1	1	1	1	1	1	1	1	1	1	1	1	1	1	1	1	1
OG0000872	HOG0000917	74	1	1	1	1	1	1	1	1	1	1	1	1	1	1	1	1	1	1	1	1	1	1	1	1	1	1	1	1	1	1	1	1	1	1	1	1	1	1	1	1	1	1	1	1	1	1	1
OG0000873	HOG0000918	74	1	1	1	1	1	1	1	1	1	1	1	1	1	1	1	1	1	1	1	1	1	1	1	1	1	1	1	1	1	1	1	1	1	1	1	1	1	1	1	1	1	1	1	1	1	1	1
OG0000874	HOG0000919	74	1	1	1	1	1	1	1	1	1	1	1	1	1	1	1	1	1	1	1	1	1	1	1	1	1	1	1	1	1	1	1	1	1	1	1	1	1	1	1	1	1	1	1	1	1	1	1
OG0000875	HOG0000920	74	1	1	1	1	1	1	1	1	1	1	1	1	1	1	1	1	1	1	1	1	1	1	1	1	1	1	1	1	1	1	1	1	1	1	1	1	1	1	1	1	1	1	1	1	1	1	1
OG0000876	HOG0000921	74	1	1	1	1	1	1	1	1	1	1	1	1	1	1	1	1	1	1	1	1	1	1	1	1	1	1	1	1	1	1	1	1	1	1	1	1	1	1	1	1	1	1	1	1	1	1	1
OG0000877	HOG0000922	74	1	1	1	1	1	1	1	1	1	1	1	1	1	1	1	1	1	1	1	1	1	1	1	1	1	1	1	1	1	1	1	1	1	1	1	1	1	1	1	1	1	1	1	1	1	1	1
OG0000878	HOG0000923	74	1	1	1	1	1	1	1	1	1	1	1	1	1	1	1	1	1	1	1	1	1	1	1	1	1	1	1	1	1	1	1	1	1	1	1	1	1	1	1	1	1	1	1	1	1	1	1
OG0000879	HOG0000924	74	1	1	1	1	1	1	1	1	1	1	1	1	1	1	1	1	1	1	1	1	1	1	1	1	1	1	1	1	1	1	1	1	1	1	1	1	1	1	1	1	1	1	1	1	1	1	1
OG0000880	HOG0000925	74	1	1	1	1	1	1	1	1	1	1	1	1	1	1	1	1	1	1	1	1	1	1	1	1	1	1	1	1	1	1	1	1	1	1	1	1	1	1	1	1	1	1	1	1	1	1	1
OG0000881	HOG0000926	74	1	1	1	1	1	1	1	1	1	1	1	1	1	1	1	1	1	1	1	1	1	1	1	1	1	1	1	1	1	1	1	1	1	1	1	1	1	1	1	1	1	1	1	1	1	1	1
OG0000882	HOG0000927	74	1	1	1	1	1	1	1	1	1	1	1	1	1	1	1	1	1	1	1	1	1	1	1	1	1	1	1	1	1	1	1	1	1	1	1	1	1	1	1	1	1	1	1	1	1	1	1
OG0000883	HOG0000928	74	1	1	1	1	1	1	1	1	1	1	1	1	1	1	1	1	1	1	1	1	1	1	1	1	1	1	1	1	1	1	1	1	1	1	1	1	1	1	1	1	1	1	1	1	1	1	1
OG0000884	HOG0000929	74	1	1	1	1	1	1	1	1	1	1	1	1	1	1	1	1	1	1	1	1	1	1	1	1	1	1	1	1	1	1	1	1	1	1	1	1	1	1	1	1	1	1	1	1	1	1	1
OG0000885	HOG0000930	74	1	1	1	1	1	1	1	1	1	1	1	1	1	1	1	1	1	1	1	1	1	1	1	1	1	1	1	1	1	1	1	1	1	1	1	1	1	1	1	1	1	1	1	1	1	1	1
OG0000886	HOG0000931	74	1	1	1	1	1	1	1	1	1	1	1	1	1	1	1	1	1	1	1	1	1	1	1	1	1	1	1	1	1	1	1	1	1	1	1	1	1	1	1	1	1	1	1	1	1	1	1
OG0000887	HOG0000932	74	1	1	1	1	1	1	1	1	1	1	1	1	1	1	1	1	1	1	1	1	1	1	1	1	1	1	1	1	1	1	1	1	1	1	1	1	1	1	1	1	1	1	1	1	1	1	1
OG0000888	HOG0000933	74	1	1	1	1	1	1	1	1	1	1	1	1	1	1	1	1	1	1	1	1	1	1	1	1	1	1	1	1	1	1	1	1	1	1	1	1	1	1	1	1	1	1	1	1	1	1	1
OG0000889	HOG0000934	74	1	1	1	1	1	1	1	1	1	1	1	1	1	1	1	1	1	1	1	1	1	1	1	1	1	1	1	1	1	1	1	1	1	1	1	1	1	1	1	1	1	1	1	1	1	1	1
OG0000890	HOG0000935	74	1	1	1	1	1	1	1	1	1	1	1	1	1	1	1	1	1	1	1	1	1	1	1	1	1	1	1	1	1	1	1	1	1	1	1	1	1	1	1	1	1	1	1	1	1	1	1
OG0000891	HOG0000936	74	1	1	1	1	1	1	1	1	1	1	1	1	1	1	1	1	1	1	1	1	1	1	1	1	1	1	1	1	1	1	1	1	1	1	1	1	1	1	1	1	1	1	1	1	1	1	1
OG0000892	HOG0000937	74	1	1	1	1	1	1	1	1	1	1	1	1	1	1	1	1	1	1	1	1	1	1	1	1	1	1	1	1	1	1	1	1	1	1	1	1	1	1	1	1	1	1	1	1	1	1	1
OG0000893	HOG0000938	74	1	1	1	1	1	1	1	1	1	1	1	1	1	1	1	1	1	1	1	1	1	1	1	1	1	1	1	1	1	1	1	1	1	1	1	1	1	1	1	1	1	1	1	1	1	1	1
OG0000894	HOG0000939	74	1	1	1	1	1	1	1	1	1	1	1	1	1	1	1	1	1	1	1	1	1	1	1	1	1	1	1	1	1	1	1	1	1	1	1	1	1	1	1	1	1	1	1	1	1	1	1
OG0000895	HOG0000940	74	1	1	1	1	1	1	1	1	1	1	1	1	1	1	1	1	1	1	1	1	1	1	1	1	1	1	1	1	1	1	1	1	1	1	1	1	1	1	1	1	1	1	1	1	1	1	1
OG0000896	HOG0000941	74	1	1	1	1	1	1	1	1	1	1	1	1	1	1	1	1	1	1	1	1	1	1	1	1	1	1	1	1	1	1	1	1	1	1	1	1	1	1	1	1	1	1	1	1	1	1	1
OG0000897	HOG0000942	74	1	1	1	1	1	1	1	1	1	1	1	1	1	1	1	1	1	1	1	1	1	1	1	1	1	1	1	1	1	1	1	1	1	1	1	1	1	1	1	1	1	1	1	1	1	1	1
OG0000898	HOG0000943	74	1	1	1	1	1	1	1	1	1	1	1	1	1	1	1	1	1	1	1	1	1	1	1	1	1	1	1	1	1	1	1	1	1	1	1	1	1	1	1	1	1	1	1	1	1	1	1
OG0000899	HOG0000944	74	1	1	1	1	1	1	1	1	1	1	1	1	1	1	1	1	1	1	1	1	1	1	1	1	1	1	1	1	1	1	1	1	1	1	1	1	1	1	1	1	1	1	1	1	1	1	1
OG0000900	HOG0000945	74	1	1	1	1	1	1	1	1	1	1	1	1	1	1	1	1	1	1	1	1	1	1	1	1	1	1	1	1	1	1	1	1	1	1	1	1	1	1	1	1	1	1	1	1	1	1	1
OG0000901	HOG0000946	74	1	1	1	1	1	1	1	1	1	1	1	1	1	1	1	1	1	1	1	1	1	1	1	1	1	1	1	1	1	1	1	1	1	1	1	1	1	1	1	1	1	1	1	1	1	1	1
OG0000902	HOG0000947	74	1	1	1	1	1	1	1	1	1	1	1	1	1	1	1	1	1	1	1	1	1	1	1	1	1	1	1	1	1	1	1	1	1	1	1	1	1	1	1	1	1	1	1	1	1	1	1
OG0000903	HOG0000948	74	1	1	1	1	1	1	1	1	1	1	1	1	1	1	1	1	1	1	1	1	1	1	1	1	1	1	1	1	1	1	1	1	1	1	1	1	1	1	1	1	1	1	1	1	1	1	1
OG0000904	HOG0000949	74	1	1	1	1	1	1	1	1	1	1	1	1	1	1	1	1	1	1	1	1	1	1	1	1	1	1	1	1	1	1	1	1	1	1	1	1	1	1	1	1	1	1	1	1	1	1	1
OG0000905	HOG0000950	74	1	1	1	1	1	1	1	1	1	1	1	1	1	1	1	1	1	1	1	1	1	1	1	1	1	1	1	1	1	1	1	1	1	1	1	1	1	1	1	1	1	1	1	1	1	1	1
OG0000906	HOG0000951	74	1	1	1	1	1	1	1	1	1	1	1	1	1	1	1	1	1	1	1	1	1	1	1	1	1	1	1	1	1	1	1	1	1	1	1	1	1	1	1	1	1	1	1	1	1	1	1
OG0000907	HOG0000952	74	1	1	1	1	1	1	1	1	1	1	1	1	1	1	1	1	1	1	1	1	1	1	1	1	1	1	1	1	1	1	1	1	1	1	1	1	1	1	1	1	1	1	1	1	1	1	1
OG0000908	HOG0000953	74	1	1	1	1	1	1	1	1	1	1	1	1	1	1	1	1	1	1	1	1	1	1	1	1	1	1	1	1	1	1	1	1	1	1	1	1	1	1	1	1	1	1	1	1	1	1	1
OG0000909	HOG0000954	74	1	1	1	1	1	1	1	1	1	1	1	1	1	1	1	1	1	1	1	1	1	1	1	1	1	1	1	1	1	1	1	1	1	1	1	1	1	1	1	1	1	1	1	1	1	1	1
OG0000910	HOG0000955	74	1	1	1	1	1	1	1	1	1	1	1	1	1	1	1	1	1	1	1	1	1	1	1	1	1	1	1	1	1	1	1	1	1	1	1	1	1	1	1	1	1	1	1	1	1	1	1
OG0000911	HOG0000956	74	1	1	1	1	1	1	1	1	1	1	1	1	1	1	1	1	1	1	1	1	1	1	1	1	1	1	1	1	1	1	1	1	1	1	1	1	1	1	1	1	1	1	1	1	1	1	1
OG0000912	HOG0000957	74	1	1	1	1	1	1	1	1	1	1	1	1	1	1	1	1	1	1	1	1	1	1	1	1	1	1	1	1	1	1	1	1	1	1	1	1	1	1	1	1	1	1	1	1	1	1	1
OG0000913	HOG0000958	74	1	1	1	1	1	1	1	1	1	1	1	1	1	1	1	1	1	1	1	1	1	1	1	1	1	1	1	1	1	1	1	1	1	1	1	1	1	1	1	1	1	1	1	1	1	1	1
OG0000914	HOG0000959	74	1	1	1	1	1	1	1	1	1	1	1	1	1	1	1	1	1	1	1	1	1	1	1	1	1	1	1	1	1	1	1	1	1	1	1	1	1	1	1	1	1	1	1	1	1	1	1
OG0000915	HOG0000960	74	1	1	1	1	1	1	1	1	1	1	1	1	1	1	1	1	1	1	1	1	1	1	1	1	1	1	1	1	1	1	1	1	1	1	1	1	1	1	1	1	1	1	1	1	1	1	1
OG0000916	HOG0000961	74	1	1	1	1	1	1	1	1	1	1	1	1	1	1	1	1	1	1	1	1	1	1	1	1	1	1	1	1	1	1	1	1	1	1	1	1	1	1	1	1	1	1	1	1	1	1	1
OG0000917	HOG0000962	74	1	1	1	1	1	1	1	1	1	1	1	1	1	1	1	1	1	1	1	1	1	1	1	1	1	1	1	1	1	1	1	1	1	1	1	1	1	1	1	1	1	1	1	1	1	1	1
OG0000918	HOG0000963	74	1	1	1	1	1	1	1	1	1	1	1	1	1	1	1	1	1	1	1	1	1	1	1	1	1	1	1	1	1	1	1	1	1	1	1	1	1	1	1	1	1	1	1	1	1	1	1
OG0000919	HOG0000964	74	1	1	1	1	1	1	1	1	1	1	1	1	1	1	1	1	1	1	1	1	1	1	1	1	1	1	1	1	1	1	1	1	1	1	1	1	1	1	1	1	1	1	1	1	1	1	1
OG0000920	HOG0000965	74	1	1	1	1	1	1	1	1	1	1	1	1	1	1	1	1	1	1	1	1	1	1	1	1	1	1	1	1	1	1	1	1	1	1	1	1	1	1	1	1	1	1	1	1	1	1	1
OG0000921	HOG0000966	74	1	1	1	1	1	1	1	1	1	1	1	1	1	1	1	1	1	1	1	1	1	1	1	1	1	1	1	1	1	1	1	1	1	1	1	1	1	1	1	1	1	1	1	1	1	1	1
OG0000922	HOG0000967	74	1	1	1	1	1	1	1	1	1	1	1	1	1	1	1	1	1	1	1	1	1	1	1	1	1	1	1	1	1	1	1	1	1	1	1	1	1	1	1	1	1	1	1	1	1	1	1
OG0000923	HOG0000968	74	1	1	1	1	1	1	1	1	1	1	1	1	1	1	1	1	1	1	1	1	1	1	1	1	1	1	1	1	1	1	1	1	1	1	1	1	1	1	1	1	1	1	1	1	1	1	1
OG0000924	HOG0000969	74	1	1	1	1	1	1	1	1	1	1	1	1	1	1	1	1	1	1	1	1	1	1	1	1	1	1	1	1	1	1	1	1	1	1	1	1	1	1	1	1	1	1	1	1	1	1	1
OG0000925	HOG0000970	74	1	1	1	1	1	1	1	1	1	1	1	1	1	1	1	1	1	1	1	1	1	1	1	1	1	1	1	1	1	1	1	1	1	1	1	1	1	1	1	1	1	1	1	1	1	1	1
OG0000926	HOG0000971	74	1	1	1	1	1	1	1	1	1	1	1	1	1	1	1	1	1	1	1	1	1	1	1	1	1	1	1	1	1	1	1	1	1	1	1	1	1	1	1	1	1	1	1	1	1	1	1
OG0000927	HOG0000972	74	1	1	1	1	1	1	1	1	1	1	1	1	1	1	1	1	1	1	1	1	1	1	1	1	1	1	1	1	1	1	1	1	1	1	1	1	1	1	1	1	1	1	1	1	1	1	1
OG0000928	HOG0000973	74	1	1	1	1	1	1	1	1	1	1	1	1	1	1	1	1	1	1	1	1	1	1	1	1	1	1	1	1	1	1	1	1	1	1	1	1	1	1	1	1	1	1	1	1	1	1	1
OG0000929	HOG0000974	74	1	1	1	1	1	1	1	1	1	1	1	1	1	1	1	1	1	1	1	1	1	1	1	1	1	1	1	1	1	1	1	1	1	1	1	1	1	1	1	1	1	1	1	1	1	1	1
OG0000930	HOG0000975	74	1	1	1	1	1	1	1	1	1	1	1	1	1	1	1	1	1	1	1	1	1	1	1	1	1	1	1	1	1	1	1	1	1	1	1	1	1	1	1	1	1	1	1	1	1	1	1
OG0000931	HOG0000976	74	1	1	1	1	1	1	1	1	1	1	1	1	1	1	1	1	1	1	1	1	1	1	1	1	1	1	1	1	1	1	1	1	1	1	1	1	1	1	1	1	1	1	1	1	1	1	1
OG0000932	HOG0000977	74	1	1	1	1	1	1	1	1	1	1	1	1	1	1	1	1	1	1	1	1	1	1	1	1	1	1	1	1	1	1	1	1	1	1	1	1	1	1	1	1	1	1	1	1	1	1	1
OG0000933	HOG0000978	74	1	1	1	1	1	1	1	1	1	1	1	1	1	1	1	1	1	1	1	1	1	1	1	1	1	1	1	1	1	1	1	1	1	1	1	1	1	1	1	1	1	1	1	1	1	1	1
OG0000934	HOG0000979	74	1	1	1	1	1	1	1	1	1	1	1	1	1	1	1	1	1	1	1	1	1	1	1	1	1	1	1	1	1	1	1	1	1	1	1	1	1	1	1	1	1	1	1	1	1	1	1
OG0000935	HOG0000980	74	1	1	1	1	1	1	1	1	1	1	1	1	1	1	1	1	1	1	1	1	1	1	1	1	1	1	1	1	1	1	1	1	1	1	1	1	1	1	1	1	1	1	1	1	1	1	1
OG0000936	HOG0000981	74	1	1	1	1	1	1	1	1	1	1	1	1	1	1	1	1	1	1	1	1	1	1	1	1	1	1	1	1	1	1	1	1	1	1	1	1	1	1	1	1	1	1	1	1	1	1	1
OG0000937	HOG0000982	74	1	1	1	1	1	1	1	1	1	1	1	1	1	1	1	1	1	1	1	1	1	1	1	1	1	1	1	1	1	1	1	1	1	1	1	1	1	1	1	1	1	1	1	1	1	1	1
OG0000938	HOG0000983	74	1	1	1	1	1	1	1	1	1	1	1	1	1	1	1	1	1	1	1	1	1	1	1	1	1	1	1	1	1	1	1	1	1	1	1	1	1	1	1	1	1	1	1	1	1	1	1
OG0000939	HOG0000984	74	1	1	1	1	1	1	1	1	1	1	1	1	1	1	1	1	1	1	1	1	1	1	1	1	1	1	1	1	1	1	1	1	1	1	1	1	1	1	1	1	1	1	1	1	1	1	1
OG0000940	HOG0000985	74	1	1	1	1	1	1	1	1	1	1	1	1	1	1	1	1	1	1	1	1	1	1	1	1	1	1	1	1	1	1	1	1	1	1	1	1	1	1	1	1	1	1	1	1	1	1	1
OG0000941	HOG0000986	74	1	1	1	1	1	1	1	1	1	1	1	1	1	1	1	1	1	1	1	1	1	1	1	1	1	1	1	1	1	1	1	1	1	1	1	1	1	1	1	1	1	1	1	1	1	1	1
OG0000942	HOG0000987	74	1	1	1	1	1	1	1	1	1	1	1	1	1	1	1	1	1	1	1	1	1	1	1	1	1	1	1	1	1	1	1	1	1	1	1	1	1	1	1	1	1	1	1	1	1	1	1
OG0000943	HOG0000988	74	1	1	1	1	1	1	1	1	1	1	1	1	1	1	1	1	1	1	1	1	1	1	1	1	1	1	1	1	1	1	1	1	1	1	1	1	1	1	1	1	1	1	1	1	1	1	1
OG0000944	HOG0000989	74	1	1	1	1	1	1	1	1	1	1	1	1	1	1	1	1	1	1	1	1	1	1	1	1	1	1	1	1	1	1	1	1	1	1	1	1	1	1	1	1	1	1	1	1	1	1	1
OG0000945	HOG0000990	74	1	1	1	1	1	1	1	1	1	1	1	1	1	1	1	1	1	1	1	1	1	1	1	1	1	1	1	1	1	1	1	1	1	1	1	1	1	1	1	1	1	1	1	1	1	1	1
OG0000946	HOG0000991	74	1	1	1	1	1	1	1	1	1	1	1	1	1	1	1	1	1	1	1	1	1	1	1	1	1	1	1	1	1	1	1	1	1	1	1	1	1	1	1	1	1	1	1	1	1	1	1
OG0000947	HOG0000992	74	1	1	1	1	1	1	1	1	1	1	1	1	1	1	1	1	1	1	1	1	1	1	1	1	1	1	1	1	1	1	1	1	1	1	1	1	1	1	1	1	1	1	1	1	1	1	1
OG0000948	HOG0000993	74	1	1	1	1	1	1	1	1	1	1	1	1	1	1	1	1	1	1	1	1	1	1	1	1	1	1	1	1	1	1	1	1	1	1	1	1	1	1	1	1	1	1	1	1	1	1	1
OG0000949	HOG0000994	74	1	1	1	1	1	1	1	1	1	1	1	1	1	1	1	1	1	1	1	1	1	1	1	1	1	1	1	1	1	1	1	1	1	1	1	1	1	1	1	1	1	1	1	1	1	1	1
OG0000950	HOG0000995	74	1	1	1	1	1	1	1	1	1	1	1	1	1	1	1	1	1	1	1	1	1	1	1	1	1	1	1	1	1	1	1	1	1	1	1	1	1	1	1	1	1	1	1	1	1	1	1
OG0000951	HOG0000996	74	1	1	1	1	1	1	1	1	1	1	1	1	1	1	1	1	1	1	1	1	1	1	1	1	1	1	1	1	1	1	1	1	1	1	1	1	1	1	1	1	1	1	1	1	1	1	1
OG0000952	HOG0000997	74	1	1	1	1	1	1	1	1	1	1	1	1	1	1	1	1	1	1	1	1	1	1	1	1	1	1	1	1	1	1	1	1	1	1	1	1	1	1	1	1	1	1	1	1	1	1	1
OG0000953	HOG0000998	74	1	1	1	1	1	1	1	1	1	1	1	1	1	1	1	1	1	1	1	1	1	1	1	1	1	1	1	1	1	1	1	1	1	1	1	1	1	1	1	1	1	1	1	1	1	1	1
OG0000954	HOG0000999	74	1	1	1	1	1	1	1	1	1	1	1	1	1	1	1	1	1	1	1	1	1	1	1	1	1	1	1	1	1	1	1	1	1	1	1	1	1	1	1	1	1	1	1	1	1	1	1
OG0000955	HOG0001000	74	1	1	1	1	1	1	1	1	1	1	1	1	1	1	1	1	1	1	1	1	1	1	1	1	1	1	1	1	1	1	1	1	1	1	1	1	1	1	1	1	1	1	1	1	1	1	1
OG0000956	HOG0001001	74	1	1	1	1	1	1	1	1	1	1	1	1	1	1	1	1	1	1	1	1	1	1	1	1	1	1	1	1	1	1	1	1	1	1	1	1	1	1	1	1	1	1	1	1	1	1	1
OG0000957	HOG0001002	74	1	1	1	1	1	1	1	1	1	1	1	1	1	1	1	1	1	1	1	1	1	1	1	1	1	1	1	1	1	1	1	1	1	1	1	1	1	1	1	1	1	1	1	1	1	1	1
OG0000958	HOG0001003	74	1	1	1	1	1	1	1	1	1	1	1	1	1	1	1	1	1	1	1	1	1	1	1	1	1	1	1	1	1	1	1	1	1	1	1	1	1	1	1	1	1	1	1	1	1	1	1
OG0000959	HOG0001004	74	1	1	1	1	1	1	1	1	1	1	1	1	1	1	1	1	1	1	1	1	1	1	1	1	1	1	1	1	1	1	1	1	1	1	1	1	1	1	1	1	1	1	1	1	1	1	1
OG0000960	HOG0001005	74	1	1	1	1	1	1	1	1	1	1	1	1	1	1	1	1	1	1	1	1	1	1	1	1	1	1	1	1	1	1	1	1	1	1	1	1	1	1	1	1	1	1	1	1	1	1	1
OG0000961	HOG0001006	74	1	1	1	1	1	1	1	1	1	1	1	1	1	1	1	1	1	1	1	1	1	1	1	1	1	1	1	1	1	1	1	1	1	1	1	1	1	1	1	1	1	1	1	1	1	1	1
OG0000962	HOG0001007	74	1	1	1	1	1	1	1	1	1	1	1	1	1	1	1	1	1	1	1	1	1	1	1	1	1	1	1	1	1	1	1	1	1	1	1	1	1	1	1	1	1	1	1	1	1	1	1
OG0000963	HOG0001008	74	1	1	1	1	1	1	1	1	1	1	1	1	1	1	1	1	1	1	1	1	1	1	1	1	1	1	1	1	1	1	1	1	1	1	1	1	1	1	1	1	1	1	1	1	1	1	1
OG0000964	HOG0001009	74	1	1	1	1	1	1	1	1	1	1	1	1	1	1	1	1	1	1	1	1	1	1	1	1	1	1	1	1	1	1	1	1	1	1	1	1	1	1	1	1	1	1	1	1	1	1	1
OG0000965	HOG0001010	74	1	1	1	1	1	1	1	1	1	1	1	1	1	1	1	1	1	1	1	1	1	1	1	1	1	1	1	1	1	1	1	1	1	1	1	1	1	1	1	1	1	1	1	1	1	1	1
OG0000966	HOG0001011	74	1	1	1	1	1	1	1	1	1	1	1	1	1	1	1	1	1	1	1	1	1	1	1	1	1	1	1	1	1	1	1	1	1	1	1	1	1	1	1	1	1	1	1	1	1	1	1
OG0000967	HOG0001012	74	1	1	1	1	1	1	1	1	1	1	1	1	1	1	1	1	1	1	1	1	1	1	1	1	1	1	1	1	1	1	1	1	1	1	1	1	1	1	1	1	1	1	1	1	1	1	1
OG0000968	HOG0001013	74	1	1	1	1	1	1	1	1	1	1	1	1	1	1	1	1	1	1	1	1	1	1	1	1	1	1	1	1	1	1	1	1	1	1	1	1	1	1	1	1	1	1	1	1	1	1	1
OG0000969	HOG0001014	74	1	1	1	1	1	1	1	1	1	1	1	1	1	1	1	1	1	1	1	1	1	1	1	1	1	1	1	1	1	1	1	1	1	1	1	1	1	1	1	1	1	1	1	1	1	1	1
OG0000970	HOG0001015	74	1	1	1	1	1	1	1	1	1	1	1	1	1	1	1	1	1	1	1	1	1	1	1	1	1	1	1	1	1	1	1	1	1	1	1	1	1	1	1	1	1	1	1	1	1	1	1
OG0000971	HOG0001016	74	1	1	1	1	1	1	1	1	1	1	1	1	1	1	1	1	1	1	1	1	1	1	1	1	1	1	1	1	1	1	1	1	1	1	1	1	1	1	1	1	1	1	1	1	1	1	1
OG0000972	HOG0001017	74	1	1	1	1	1	1	1	1	1	1	1	1	1	1	1	1	1	1	1	1	1	1	1	1	1	1	1	1	1	1	1	1	1	1	1	1	1	1	1	1	1	1	1	1	1	1	1
OG0000973	HOG0001018	74	1	1	1	1	1	1	1	1	1	1	1	1	1	1	1	1	1	1	1	1	1	1	1	1	1	1	1	1	1	1	1	1	1	1	1	1	1	1	1	1	1	1	1	1	1	1	1
OG0000974	HOG0001019	74	1	1	1	1	1	1	1	1	1	1	1	1	1	1	1	1	1	1	1	1	1	1	1	1	1	1	1	1	1	1	1	1	1	1	1	1	1	1	1	1	1	1	1	1	1	1	1
OG0000975	HOG0001020	74	1	1	1	1	1	1	1	1	1	1	1	1	1	1	1	1	1	1	1	1	1	1	1	1	1	1	1	1	1	1	1	1	1	1	1	1	1	1	1	1	1	1	1	1	1	1	1
OG0000976	HOG0001021	74	1	1	1	1	1	1	1	1	1	1	1	1	1	1	1	1	1	1	1	1	1	1	1	1	1	1	1	1	1	1	1	1	1	1	1	1	1	1	1	1	1	1	1	1	1	1	1
OG0000977	HOG0001022	74	1	1	1	1	1	1	1	1	1	1	1	1	1	1	1	1	1	1	1	1	1	1	1	1	1	1	1	1	1	1	1	1	1	1	1	1	1	1	1	1	1	1	1	1	1	1	1
OG0000978	HOG0001023	74	1	1	1	1	1	1	1	1	1	1	1	1	1	1	1	1	1	1	1	1	1	1	1	1	1	1	1	1	1	1	1	1	1	1	1	1	1	1	1	1	1	1	1	1	1	1	1
OG0000979	HOG0001024	74	1	1	1	1	1	1	1	1	1	1	1	1	1	1	1	1	1	1	1	1	1	1	1	1	1	1	1	1	1	1	1	1	1	1	1	1	1	1	1	1	1	1	1	1	1	1	1
OG0000980	HOG0001025	74	1	1	1	1	1	1	1	1	1	1	1	1	1	1	1	1	1	1	1	1	1	1	1	1	1	1	1	1	1	1	1	1	1	1	1	1	1	1	1	1	1	1	1	1	1	1	1
OG0000981	HOG0001026	74	1	1	1	1	1	1	1	1	1	1	1	1	1	1	1	1	1	1	1	1	1	1	1	1	1	1	1	1	1	1	1	1	1	1	1	1	1	1	1	1	1	1	1	1	1	1	1
OG0000982	HOG0001027	74	1	1	1	1	1	1	1	1	1	1	1	1	1	1	1	1	1	1	1	1	1	1	1	1	1	1	1	1	1	1	1	1	1	1	1	1	1	1	1	1	1	1	1	1	1	1	1
OG0000983	HOG0001028	74	1	1	1	1	1	1	1	1	1	1	1	1	1	1	1	1	1	1	1	1	1	1	1	1	1	1	1	1	1	1	1	1	1	1	1	1	1	1	1	1	1	1	1	1	1	1	1
OG0000984	HOG0001029	74	1	1	1	1	1	1	1	1	1	1	1	1	1	1	1	1	1	1	1	1	1	1	1	1	1	1	1	1	1	1	1	1	1	1	1	1	1	1	1	1	1	1	1	1	1	1	1
OG0000985	HOG0001030	74	1	1	1	1	1	1	1	1	1	1	1	1	1	1	1	1	1	1	1	1	1	1	1	1	1	1	1	1	1	1	1	1	1	1	1	1	1	1	1	1	1	1	1	1	1	1	1
OG0000986	HOG0001031	74	1	1	1	1	1	1	1	1	1	1	1	1	1	1	1	1	1	1	1	1	1	1	1	1	1	1	1	1	1	1	1	1	1	1	1	1	1	1	1	1	1	1	1	1	1	1	1
OG0000987	HOG0001032	74	1	1	1	1	1	1	1	1	1	1	1	1	1	1	1	1	1	1	1	1	1	1	1	1	1	1	1	1	1	1	1	1	1	1	1	1	1	1	1	1	1	1	1	1	1	1	1
OG0000988	HOG0001033	74	1	1	1	1	1	1	1	1	1	1	1	1	1	1	1	1	1	1	1	1	1	1	1	1	1	1	1	1	1	1	1	1	1	1	1	1	1	1	1	1	1	1	1	1	1	1	1
OG0000989	HOG0001034	74	1	1	1	1	1	1	1	1	1	1	1	1	1	1	1	1	1	1	1	1	1	1	1	1	1	1	1	1	1	1	1	1	1	1	1	1	1	1	1	1	1	1	1	1	1	1	1
OG0000990	HOG0001035	74	1	1	1	1	1	1	1	1	1	1	1	1	1	1	1	1	1	1	1	1	1	1	1	1	1	1	1	1	1	1	1	1	1	1	1	1	1	1	1	1	1	1	1	1	1	1	1
OG0000991	HOG0001036	74	1	1	1	1	1	1	1	1	1	1	1	1	1	1	1	1	1	1	1	1	1	1	1	1	1	1	1	1	1	1	1	1	1	1	1	1	1	1	1	1	1	1	1	1	1	1	1
OG0000992	HOG0001037	74	1	1	1	1	1	1	1	1	1	1	1	1	1	1	1	1	1	1	1	1	1	1	1	1	1	1	1	1	1	1	1	1	1	1	1	1	1	1	1	1	1	1	1	1	1	1	1
OG0000993	HOG0001038	74	1	1	1	1	1	1	1	1	1	1	1	1	1	1	1	1	1	1	1	1	1	1	1	1	1	1	1	1	1	1	1	1	1	1	1	1	1	1	1	1	1	1	1	1	1	1	1
OG0000994	HOG0001039	74	1	1	1	1	1	1	1	1	1	1	1	1	1	1	1	1	1	1	1	1	1	1	1	1	1	1	1	1	1	1	1	1	1	1	1	1	1	1	1	1	1	1	1	1	1	1	1
OG0000995	HOG0001040	74	1	1	1	1	1	1	1	1	1	1	1	1	1	1	1	1	1	1	1	1	1	1	1	1	1	1	1	1	1	1	1	1	1	1	1	1	1	1	1	1	1	1	1	1	1	1	1
OG0000996	HOG0001041	74	1	1	1	1	1	1	1	1	1	1	1	1	1	1	1	1	1	1	1	1	1	1	1	1	1	1	1	1	1	1	1	1	1	1	1	1	1	1	1	1	1	1	1	1	1	1	1
OG0000997	HOG0001042	74	1	1	1	1	1	1	1	1	1	1	1	1	1	1	1	1	1	1	1	1	1	1	1	1	1	1	1	1	1	1	1	1	1	1	1	1	1	1	1	1	1	1	1	1	1	1	1
OG0000998	HOG0001043	74	1	1	1	1	1	1	1	1	1	1	1	1	1	1	1	1	1	1	1	1	1	1	1	1	1	1	1	1	1	1	1	1	1	1	1	1	1	1	1	1	1	1	1	1	1	1	1
OG0000999	HOG0001044	74	1	1	1	1	1	1	1	1	1	1	1	1	1	1	1	1	1	1	1	1	1	1	1	1	1	1	1	1	1	1	1	1	1	1	1	1	1	1	1	1	1	1	1	1	1	1	1
OG0001000	HOG0001045	74	1	1	1	1	1	1	1	1	1	1	1	1	1	1	1	1	1	1	1	1	1	1	1	1	1	1	1	1	1	1	1	1	1	1	1	1	1	1	1	1	1	1	1	1	1	1	1
OG0001001	HOG0001046	74	1	1	1	1	1	1	1	1	1	1	1	1	1	1	1	1	1	1	1	1	1	1	1	1	1	1	1	1	1	1	1	1	1	1	1	1	1	1	1	1	1	1	1	1	1	1	1
OG0001002	HOG0001047	74	1	1	1	1	1	1	1	1	1	1	1	1	1	1	1	1	1	1	1	1	1	1	1	1	1	1	1	1	1	1	1	1	1	1	1	1	1	1	1	1	1	1	1	1	1	1	1
OG0001003	HOG0001048	74	1	1	1	1	1	1	1	1	1	1	1	1	1	1	1	1	1	1	1	1	1	1	1	1	1	1	1	1	1	1	1	1	1	1	1	1	1	1	1	1	1	1	1	1	1	1	1
OG0001004	HOG0001049	74	1	1	1	1	1	1	1	1	1	1	1	1	1	1	1	1	1	1	1	1	1	1	1	1	1	1	1	1	1	1	1	1	1	1	1	1	1	1	1	1	1	1	1	1	1	1	1
OG0001005	HOG0001050	74	1	1	1	1	1	1	1	1	1	1	1	1	1	1	1	1	1	1	1	1	1	1	1	1	1	1	1	1	1	1	1	1	1	1	1	1	1	1	1	1	1	1	1	1	1	1	1
OG0001006	HOG0001051	74	1	1	1	1	1	1	1	1	1	1	1	1	1	1	1	1	1	1	1	1	1	1	1	1	1	1	1	1	1	1	1	1	1	1	1	1	1	1	1	1	1	1	1	1	1	1	1
OG0001007	HOG0001052	74	1	1	1	1	1	1	1	1	1	1	1	1	1	1	1	1	1	1	1	1	1	1	1	1	1	1	1	1	1	1	1	1	1	1	1	1	1	1	1	1	1	1	1	1	1	1	1
OG0001008	HOG0001053	74	1	1	1	1	1	1	1	1	1	1	1	1	1	1	1	1	1	1	1	1	1	1	1	1	1	1	1	1	1	1	1	1	1	1	1	1	1	1	1	1	1	1	1	1	1	1	1
OG0001009	HOG0001054	74	1	1	1	1	1	1	1	1	1	1	1	1	1	1	1	1	1	1	1	1	1	1	1	1	1	1	1	1	1	1	1	1	1	1	1	1	1	1	1	1	1	1	1	1	1	1	1
OG0001010	HOG0001055	74	1	1	1	1	1	1	1	1	1	1	1	1	1	1	1	1	1	1	1	1	1	1	1	1	1	1	1	1	1	1	1	1	1	1	1	1	1	1	1	1	1	1	1	1	1	1	1
OG0001011	HOG0001056	74	1	1	1	1	1	1	1	1	1	1	1	1	1	1	1	1	1	1	1	1	1	1	1	1	1	1	1	1	1	1	1	1	1	1	1	1	1	1	1	1	1	1	1	1	1	1	1
OG0001012	HOG0001057	74	1	1	1	1	1	1	1	1	1	1	1	1	1	1	1	1	1	1	1	1	1	1	1	1	1	1	1	1	1	1	1	1	1	1	1	1	1	1	1	1	1	1	1	1	1	1	1
OG0001013	HOG0001058	74	1	1	1	1	1	1	1	1	1	1	1	1	1	1	1	1	1	1	1	1	1	1	1	1	1	1	1	1	1	1	1	1	1	1	1	1	1	1	1	1	1	1	1	1	1	1	1
OG0001014	HOG0001059	74	1	1	1	1	1	1	1	1	1	1	1	1	1	1	1	1	1	1	1	1	1	1	1	1	1	1	1	1	1	1	1	1	1	1	1	1	1	1	1	1	1	1	1	1	1	1	1
OG0001015	HOG0001060	74	1	1	1	1	1	1	1	1	1	1	1	1	1	1	1	1	1	1	1	1	1	1	1	1	1	1	1	1	1	1	1	1	1	1	1	1	1	1	1	1	1	1	1	1	1	1	1
OG0001016	HOG0001061	74	1	1	1	1	1	1	1	1	1	1	1	1	1	1	1	1	1	1	1	1	1	1	1	1	1	1	1	1	1	1	1	1	1	1	1	1	1	1	1	1	1	1	1	1	1	1	1
OG0001017	HOG0001062	74	1	1	1	1	1	1	1	1	1	1	1	1	1	1	1	1	1	1	1	1	1	1	1	1	1	1	1	1	1	1	1	1	1	1	1	1	1	1	1	1	1	1	1	1	1	1	1
OG0001018	HOG0001063	74	1	1	1	1	1	1	1	1	1	1	1	1	1	1	1	1	1	1	1	1	1	1	1	1	1	1	1	1	1	1	1	1	1	1	1	1	1	1	1	1	1	1	1	1	1	1	1
OG0001019	HOG0001064	74	1	1	1	1	1	1	1	1	1	1	1	1	1	1	1	1	1	1	1	1	1	1	1	1	1	1	1	1	1	1	1	1	1	1	1	1	1	1	1	1	1	1	1	1	1	1	1
OG0001020	HOG0001065	74	1	1	1	1	1	1	1	1	1	1	1	1	1	1	1	1	1	1	1	1	1	1	1	1	1	1	1	1	1	1	1	1	1	1	1	1	1	1	1	1	1	1	1	1	1	1	1
OG0001021	HOG0001066	74	1	1	1	1	1	1	1	1	1	1	1	1	1	1	1	1	1	1	1	1	1	1	1	1	1	1	1	1	1	1	1	1	1	1	1	1	1	1	1	1	1	1	1	1	1	1	1
OG0001022	HOG0001067	74	1	1	1	1	1	1	1	1	1	1	1	1	1	1	1	1	1	1	1	1	1	1	1	1	1	1	1	1	1	1	1	1	1	1	1	1	1	1	1	1	1	1	1	1	1	1	1
OG0001023	HOG0001068	74	1	1	1	1	1	1	1	1	1	1	1	1	1	1	1	1	1	1	1	1	1	1	1	1	1	1	1	1	1	1	1	1	1	1	1	1	1	1	1	1	1	1	1	1	1	1	1
OG0001024	HOG0001069	74	1	1	1	1	1	1	1	1	1	1	1	1	1	1	1	1	1	1	1	1	1	1	1	1	1	1	1	1	1	1	1	1	1	1	1	1	1	1	1	1	1	1	1	1	1	1	1
OG0001025	HOG0001070	74	1	1	1	1	1	1	1	1	1	1	1	1	1	1	1	1	1	1	1	1	1	1	1	1	1	1	1	1	1	1	1	1	1	1	1	1	1	1	1	1	1	1	1	1	1	1	1
OG0001026	HOG0001071	74	1	1	1	1	1	1	1	1	1	1	1	1	1	1	1	1	1	1	1	1	1	1	1	1	1	1	1	1	1	1	1	1	1	1	1	1	1	1	1	1	1	1	1	1	1	1	1
OG0001027	HOG0001072	74	1	1	1	1	1	1	1	1	1	1	1	1	1	1	1	1	1	1	1	1	1	1	1	1	1	1	1	1	1	1	1	1	1	1	1	1	1	1	1	1	1	1	1	1	1	1	1
OG0001028	HOG0001073	74	1	1	1	1	1	1	1	1	1	1	1	1	1	1	1	1	1	1	1	1	1	1	1	1	1	1	1	1	1	1	1	1	1	1	1	1	1	1	1	1	1	1	1	1	1	1	1
OG0001029	HOG0001074	74	1	1	1	1	1	1	1	1	1	1	1	1	1	1	1	1	1	1	1	1	1	1	1	1	1	1	1	1	1	1	1	1	1	1	1	1	1	1	1	1	1	1	1	1	1	1	1
OG0001030	HOG0001075	74	1	1	1	1	1	1	1	1	1	1	1	1	1	1	1	1	1	1	1	1	1	1	1	1	1	1	1	1	1	1	1	1	1	1	1	1	1	1	1	1	1	1	1	1	1	1	1
OG0001031	HOG0001076	74	1	1	1	1	1	1	1	1	1	1	1	1	1	1	1	1	1	1	1	1	1	1	1	1	1	1	1	1	1	1	1	1	1	1	1	1	1	1	1	1	1	1	1	1	1	1	1
OG0001032	HOG0001077	74	1	1	1	1	1	1	1	1	1	1	1	1	1	1	1	1	1	1	1	1	1	1	1	1	1	1	1	1	1	1	1	1	1	1	1	1	1	1	1	1	1	1	1	1	1	1	1
OG0001033	HOG0001078	74	1	1	1	1	1	1	1	1	1	1	1	1	1	1	1	1	1	1	1	1	1	1	1	1	1	1	1	1	1	1	1	1	1	1	1	1	1	1	1	1	1	1	1	1	1	1	1
OG0001034	HOG0001079	74	1	1	1	1	1	1	1	1	1	1	1	1	1	1	1	1	1	1	1	1	1	1	1	1	1	1	1	1	1	1	1	1	1	1	1	1	1	1	1	1	1	1	1	1	1	1	1
OG0001035	HOG0001080	74	1	1	1	1	1	1	1	1	1	1	1	1	1	1	1	1	1	1	1	1	1	1	1	1	1	1	1	1	1	1	1	1	1	1	1	1	1	1	1	1	1	1	1	1	1	1	1
OG0001036	HOG0001081	74	1	1	1	1	1	1	1	1	1	1	1	1	1	1	1	1	1	1	1	1	1	1	1	1	1	1	1	1	1	1	1	1	1	1	1	1	1	1	1	1	1	1	1	1	1	1	1
OG0001037	HOG0001082	74	1	1	1	1	1	1	1	1	1	1	1	1	1	1	1	1	1	1	1	1	1	1	1	1	1	1	1	1	1	1	1	1	1	1	1	1	1	1	1	1	1	1	1	1	1	1	1
OG0001038	HOG0001083	74	1	1	1	1	1	1	1	1	1	1	1	1	1	1	1	1	1	1	1	1	1	1	1	1	1	1	1	1	1	1	1	1	1	1	1	1	1	1	1	1	1	1	1	1	1	1	1
OG0001039	HOG0001084	74	1	1	1	1	1	1	1	1	1	1	1	1	1	1	1	1	1	1	1	1	1	1	1	1	1	1	1	1	1	1	1	1	1	1	1	1	1	1	1	1	1	1	1	1	1	1	1
OG0001040	HOG0001085	74	1	1	1	1	1	1	1	1	1	1	1	1	1	1	1	1	1	1	1	1	1	1	1	1	1	1	1	1	1	1	1	1	1	1	1	1	1	1	1	1	1	1	1	1	1	1	1
OG0001041	HOG0001086	74	1	1	1	1	1	1	1	1	1	1	1	1	1	1	1	1	1	1	1	1	1	1	1	1	1	1	1	1	1	1	1	1	1	1	1	1	1	1	1	1	1	1	1	1	1	1	1
OG0001042	HOG0001087	74	1	1	1	1	1	1	1	1	1	1	1	1	1	1	1	1	1	1	1	1	1	1	1	1	1	1	1	1	1	1	1	1	1	1	1	1	1	1	1	1	1	1	1	1	1	1	1
OG0001043	HOG0001088	74	1	1	1	1	1	1	1	1	1	1	1	1	1	1	1	1	1	1	1	1	1	1	1	1	1	1	1	1	1	1	1	1	1	1	1	1	1	1	1	1	1	1	1	1	1	1	1
OG0001044	HOG0001089	74	1	1	1	1	1	1	1	1	1	1	1	1	1	1	1	1	1	1	1	1	1	1	1	1	1	1	1	1	1	1	1	1	1	1	1	1	1	1	1	1	1	1	1	1	1	1	1
OG0001045	HOG0001090	74	1	1	1	1	1	1	1	1	1	1	1	1	1	1	1	1	1	1	1	1	1	1	1	1	1	1	1	1	1	1	1	1	1	1	1	1	1	1	1	1	1	1	1	1	1	1	1
OG0001046	HOG0001091	74	1	1	1	1	1	1	1	1	1	1	1	1	1	1	1	1	1	1	1	1	1	1	1	1	1	1	1	1	1	1	1	1	1	1	1	1	1	1	1	1	1	1	1	1	1	1	1
OG0001047	HOG0001092	74	1	1	1	1	1	1	1	1	1	1	1	1	1	1	1	1	1	1	1	1	1	1	1	1	1	1	1	1	1	1	1	1	1	1	1	1	1	1	1	1	1	1	1	1	1	1	1
OG0001048	HOG0001093	74	1	1	1	1	1	1	1	1	1	1	1	1	1	1	1	1	1	1	1	1	1	1	1	1	1	1	1	1	1	1	1	1	1	1	1	1	1	1	1	1	1	1	1	1	1	1	1
OG0001049	HOG0001094	74	1	1	1	1	1	1	1	1	1	1	1	1	1	1	1	1	1	1	1	1	1	1	1	1	1	1	1	1	1	1	1	1	1	1	1	1	1	1	1	1	1	1	1	1	1	1	1
OG0001050	HOG0001095	74	1	1	1	1	1	1	1	1	1	1	1	1	1	1	1	1	1	1	1	1	1	1	1	1	1	1	1	1	1	1	1	1	1	1	1	1	1	1	1	1	1	1	1	1	1	1	1
OG0001051	HOG0001096	74	1	1	1	1	1	1	1	1	1	1	1	1	1	1	1	1	1	1	1	1	1	1	1	1	1	1	1	1	1	1	1	1	1	1	1	1	1	1	1	1	1	1	1	1	1	1	1
OG0001052	HOG0001097	74	1	1	1	1	1	1	1	1	1	1	1	1	1	1	1	1	1	1	1	1	1	1	1	1	1	1	1	1	1	1	1	1	1	1	1	1	1	1	1	1	1	1	1	1	1	1	1
OG0001053	HOG0001098	74	1	1	1	1	1	1	1	1	1	1	1	1	1	1	1	1	1	1	1	1	1	1	1	1	1	1	1	1	1	1	1	1	1	1	1	1	1	1	1	1	1	1	1	1	1	1	1
OG0001054	HOG0001099	74	1	1	1	1	1	1	1	1	1	1	1	1	1	1	1	1	1	1	1	1	1	1	1	1	1	1	1	1	1	1	1	1	1	1	1	1	1	1	1	1	1	1	1	1	1	1	1
OG0001055	HOG0001100	74	1	1	1	1	1	1	1	1	1	1	1	1	1	1	1	1	1	1	1	1	1	1	1	1	1	1	1	1	1	1	1	1	1	1	1	1	1	1	1	1	1	1	1	1	1	1	1
OG0001056	HOG0001101	74	1	1	1	1	1	1	1	1	1	1	1	1	1	1	1	1	1	1	1	1	1	1	1	1	1	1	1	1	1	1	1	1	1	1	1	1	1	1	1	1	1	1	1	1	1	1	1
OG0001057	HOG0001102	74	1	1	1	1	1	1	1	1	1	1	1	1	1	1	1	1	1	1	1	1	1	1	1	1	1	1	1	1	1	1	1	1	1	1	1	1	1	1	1	1	1	1	1	1	1	1	1
OG0001058	HOG0001103	74	1	1	1	1	1	1	1	1	1	1	1	1	1	1	1	1	1	1	1	1	1	1	1	1	1	1	1	1	1	1	1	1	1	1	1	1	1	1	1	1	1	1	1	1	1	1	1
OG0001059	HOG0001104	74	1	1	1	1	1	1	1	1	1	1	1	1	1	1	1	1	1	1	1	1	1	1	1	1	1	1	1	1	1	1	1	1	1	1	1	1	1	1	1	1	1	1	1	1	1	1	1
OG0001060	HOG0001105	74	1	1	1	1	1	1	1	1	1	1	1	1	1	1	1	1	1	1	1	1	1	1	1	1	1	1	1	1	1	1	1	1	1	1	1	1	1	1	1	1	1	1	1	1	1	1	1
OG0001061	HOG0001106	74	1	1	1	1	1	1	1	1	1	1	1	1	1	1	1	1	1	1	1	1	1	1	1	1	1	1	1	1	1	1	1	1	1	1	1	1	1	1	1	1	1	1	1	1	1	1	1
OG0001062	HOG0001107	74	1	1	1	1	1	1	1	1	1	1	1	1	1	1	1	1	1	1	1	1	1	1	1	1	1	1	1	1	1	1	1	1	1	1	1	1	1	1	1	1	1	1	1	1	1	1	1
OG0001063	HOG0001108	74	1	1	1	1	1	1	1	1	1	1	1	1	1	1	1	1	1	1	1	1	1	1	1	1	1	1	1	1	1	1	1	1	1	1	1	1	1	1	1	1	1	1	1	1	1	1	1
OG0001064	HOG0001109	74	1	1	1	1	1	1	1	1	1	1	1	1	1	1	1	1	1	1	1	1	1	1	1	1	1	1	1	1	1	1	1	1	1	1	1	1	1	1	1	1	1	1	1	1	1	1	1
OG0001065	HOG0001110	74	1	1	1	1	1	1	1	1	1	1	1	1	1	1	1	1	1	1	1	1	1	1	1	1	1	1	1	1	1	1	1	1	1	1	1	1	1	1	1	1	1	1	1	1	1	1	1
OG0001066	HOG0001111	74	1	1	1	1	1	1	1	1	1	1	1	1	1	1	1	1	1	1	1	1	1	1	1	1	1	1	1	1	1	1	1	1	1	1	1	1	1	1	1	1	1	1	1	1	1	1	1
OG0001067	HOG0001112	74	1	1	1	1	1	1	1	1	1	1	1	1	1	1	1	1	1	1	1	1	1	1	1	1	1	1	1	1	1	1	1	1	1	1	1	1	1	1	1	1	1	1	1	1	1	1	1
OG0001068	HOG0001113	74	1	1	1	1	1	1	1	1	1	1	1	1	1	1	1	1	1	1	1	1	1	1	1	1	1	1	1	1	1	1	1	1	1	1	1	1	1	1	1	1	1	1	1	1	1	1	1
OG0001069	HOG0001114	74	1	1	1	1	1	1	1	1	1	1	1	1	1	1	1	1	1	1	1	1	1	1	1	1	1	1	1	1	1	1	1	1	1	1	1	1	1	1	1	1	1	1	1	1	1	1	1
OG0001070	HOG0001115	74	1	1	1	1	1	1	1	1	1	1	1	1	1	1	1	1	1	1	1	1	1	1	1	1	1	1	1	1	1	1	1	1	1	1	1	1	1	1	1	1	1	1	1	1	1	1	1
OG0001071	HOG0001116	74	1	1	1	1	1	1	1	1	1	1	1	1	1	1	1	1	1	1	1	1	1	1	1	1	1	1	1	1	1	1	1	1	1	1	1	1	1	1	1	1	1	1	1	1	1	1	1
OG0001072	HOG0001117	74	1	1	1	1	1	1	1	1	1	1	1	1	1	1	1	1	1	1	1	1	1	1	1	1	1	1	1	1	1	1	1	1	1	1	1	1	1	1	1	1	1	1	1	1	1	1	1
OG0001073	HOG0001118	74	1	1	1	1	1	1	1	1	1	1	1	1	1	1	1	1	1	1	1	1	1	1	1	1	1	1	1	1	1	1	1	1	1	1	1	1	1	1	1	1	1	1	1	1	1	1	1
OG0001074	HOG0001119	74	1	1	1	1	1	1	1	1	1	1	1	1	1	1	1	1	1	1	1	1	1	1	1	1	1	1	1	1	1	1	1	1	1	1	1	1	1	1	1	1	1	1	1	1	1	1	1
OG0001075	HOG0001120	74	1	1	1	1	1	1	1	1	1	1	1	1	1	1	1	1	1	1	1	1	1	1	1	1	1	1	1	1	1	1	1	1	1	1	1	1	1	1	1	1	1	1	1	1	1	1	1
OG0001076	HOG0001121	74	1	1	1	1	1	1	1	1	1	1	1	1	1	1	1	1	1	1	1	1	1	1	1	1	1	1	1	1	1	1	1	1	1	1	1	1	1	1	1	1	1	1	1	1	1	1	1
OG0001077	HOG0001122	74	1	1	1	1	1	1	1	1	1	1	1	1	1	1	1	1	1	1	1	1	1	1	1	1	1	1	1	1	1	1	1	1	1	1	1	1	1	1	1	1	1	1	1	1	1	1	1
OG0001078	HOG0001123	74	1	1	1	1	1	1	1	1	1	1	1	1	1	1	1	1	1	1	1	1	1	1	1	1	1	1	1	1	1	1	1	1	1	1	1	1	1	1	1	1	1	1	1	1	1	1	1
OG0001079	HOG0001124	74	1	1	1	1	1	1	1	1	1	1	1	1	1	1	1	1	1	1	1	1	1	1	1	1	1	1	1	1	1	1	1	1	1	1	1	1	1	1	1	1	1	1	1	1	1	1	1
OG0001080	HOG0001125	74	1	1	1	1	1	1	1	1	1	1	1	1	1	1	1	1	1	1	1	1	1	1	1	1	1	1	1	1	1	1	1	1	1	1	1	1	1	1	1	1	1	1	1	1	1	1	1
OG0001081	HOG0001126	74	1	1	1	1	1	1	1	1	1	1	1	1	1	1	1	1	1	1	1	1	1	1	1	1	1	1	1	1	1	1	1	1	1	1	1	1	1	1	1	1	1	1	1	1	1	1	1
OG0001082	HOG0001127	74	1	1	1	1	1	1	1	1	1	1	1	1	1	1	1	1	1	1	1	1	1	1	1	1	1	1	1	1	1	1	1	1	1	1	1	1	1	1	1	1	1	1	1	1	1	1	1
OG0001083	HOG0001128	74	1	1	1	1	1	1	1	1	1	1	1	1	1	1	1	1	1	1	1	1	1	1	1	1	1	1	1	1	1	1	1	1	1	1	1	1	1	1	1	1	1	1	1	1	1	1	1
OG0001084	HOG0001129	74	1	1	1	1	1	1	1	1	1	1	1	1	1	1	1	1	1	1	1	1	1	1	1	1	1	1	1	1	1	1	1	1	1	1	1	1	1	1	1	1	1	1	1	1	1	1	1
OG0001085	HOG0001130	74	1	1	1	1	1	1	1	1	1	1	1	1	1	1	1	1	1	1	1	1	1	1	1	1	1	1	1	1	1	1	1	1	1	1	1	1	1	1	1	1	1	1	1	1	1	1	1
OG0001086	HOG0001131	74	1	1	1	1	1	1	1	1	1	1	1	1	1	1	1	1	1	1	1	1	1	1	1	1	1	1	1	1	1	1	1	1	1	1	1	1	1	1	1	1	1	1	1	1	1	1	1
OG0001087	HOG0001132	74	1	1	1	1	1	1	1	1	1	1	1	1	1	1	1	1	1	1	1	1	1	1	1	1	1	1	1	1	1	1	1	1	1	1	1	1	1	1	1	1	1	1	1	1	1	1	1
OG0001088	HOG0001133	74	1	1	1	1	1	1	1	1	1	1	1	1	1	1	1	1	1	1	1	1	1	1	1	1	1	1	1	1	1	1	1	1	1	1	1	1	1	1	1	1	1	1	1	1	1	1	1
OG0001089	HOG0001134	74	1	1	1	1	1	1	1	1	1	1	1	1	1	1	1	1	1	1	1	1	1	1	1	1	1	1	1	1	1	1	1	1	1	1	1	1	1	1	1	1	1	1	1	1	1	1	1
OG0001090	HOG0001135	74	1	1	1	1	1	1	1	1	1	1	1	1	1	1	1	1	1	1	1	1	1	1	1	1	1	1	1	1	1	1	1	1	1	1	1	1	1	1	1	1	1	1	1	1	1	1	1
OG0001091	HOG0001136	74	1	1	1	1	1	1	1	1	1	1	1	1	1	1	1	1	1	1	1	1	1	1	1	1	1	1	1	1	1	1	1	1	1	1	1	1	1	1	1	1	1	1	1	1	1	1	1
OG0001092	HOG0001137	74	1	1	1	1	1	1	1	1	1	1	1	1	1	1	1	1	1	1	1	1	1	1	1	1	1	1	1	1	1	1	1	1	1	1	1	1	1	1	1	1	1	1	1	1	1	1	1
OG0001093	HOG0001138	74	1	1	1	1	1	1	1	1	1	1	1	1	1	1	1	1	1	1	1	1	1	1	1	1	1	1	1	1	1	1	1	1	1	1	1	1	1	1	1	1	1	1	1	1	1	1	1
OG0001094	HOG0001139	74	1	1	1	1	1	1	1	1	1	1	1	1	1	1	1	1	1	1	1	1	1	1	1	1	1	1	1	1	1	1	1	1	1	1	1	1	1	1	1	1	1	1	1	1	1	1	1
OG0001095	HOG0001140	74	1	1	1	1	1	1	1	1	1	1	1	1	1	1	1	1	1	1	1	1	1	1	1	1	1	1	1	1	1	1	1	1	1	1	1	1	1	1	1	1	1	1	1	1	1	1	1
OG0001096	HOG0001141	74	1	1	1	1	1	1	1	1	1	1	1	1	1	1	1	1	1	1	1	1	1	1	1	1	1	1	1	1	1	1	1	1	1	1	1	1	1	1	1	1	1	1	1	1	1	1	1
OG0001097	HOG0001142	74	1	1	1	1	1	1	1	1	1	1	1	1	1	1	1	1	1	1	1	1	1	1	1	1	1	1	1	1	1	1	1	1	1	1	1	1	1	1	1	1	1	1	1	1	1	1	1
OG0001098	HOG0001143	74	1	1	1	1	1	1	1	1	1	1	1	1	1	1	1	1	1	1	1	1	1	1	1	1	1	1	1	1	1	1	1	1	1	1	1	1	1	1	1	1	1	1	1	1	1	1	1
OG0001099	HOG0001144	74	1	1	1	1	1	1	1	1	1	1	1	1	1	1	1	1	1	1	1	1	1	1	1	1	1	1	1	1	1	1	1	1	1	1	1	1	1	1	1	1	1	1	1	1	1	1	1
OG0001100	HOG0001145	74	1	1	1	1	1	1	1	1	1	1	1	1	1	1	1	1	1	1	1	1	1	1	1	1	1	1	1	1	1	1	1	1	1	1	1	1	1	1	1	1	1	1	1	1	1	1	1
OG0001101	HOG0001146	74	1	1	1	1	1	1	1	1	1	1	1	1	1	1	1	1	1	1	1	1	1	1	1	1	1	1	1	1	1	1	1	1	1	1	1	1	1	1	1	1	1	1	1	1	1	1	1
OG0001102	HOG0001147	74	1	1	1	1	1	1	1	1	1	1	1	1	1	1	1	1	1	1	1	1	1	1	1	1	1	1	1	1	1	1	1	1	1	1	1	1	1	1	1	1	1	1	1	1	1	1	1
OG0001103	HOG0001148	74	1	1	1	1	1	1	1	1	1	1	1	1	1	1	1	1	1	1	1	1	1	1	1	1	1	1	1	1	1	1	1	1	1	1	1	1	1	1	1	1	1	1	1	1	1	1	1
OG0001104	HOG0001149	74	1	1	1	1	1	1	1	1	1	1	1	1	1	1	1	1	1	1	1	1	1	1	1	1	1	1	1	1	1	1	1	1	1	1	1	1	1	1	1	1	1	1	1	1	1	1	1
OG0001105	HOG0001150	74	1	1	1	1	1	1	1	1	1	1	1	1	1	1	1	1	1	1	1	1	1	1	1	1	1	1	1	1	1	1	1	1	1	1	1	1	1	1	1	1	1	1	1	1	1	1	1
OG0001106	HOG0001151	74	1	1	1	1	1	1	1	1	1	1	1	1	1	1	1	1	1	1	1	1	1	1	1	1	1	1	1	1	1	1	1	1	1	1	1	1	1	1	1	1	1	1	1	1	1	1	1
OG0001107	HOG0001152	74	1	1	1	1	1	1	1	1	1	1	1	1	1	1	1	1	1	1	1	1	1	1	1	1	1	1	1	1	1	1	1	1	1	1	1	1	1	1	1	1	1	1	1	1	1	1	1
OG0001108	HOG0001153	74	1	1	1	1	1	1	1	1	1	1	1	1	1	1	1	1	1	1	1	1	1	1	1	1	1	1	1	1	1	1	1	1	1	1	1	1	1	1	1	1	1	1	1	1	1	1	1
OG0001109	HOG0001154	74	1	1	1	1	1	1	1	1	1	1	1	1	1	1	1	1	1	1	1	1	1	1	1	1	1	1	1	1	1	1	1	1	1	1	1	1	1	1	1	1	1	1	1	1	1	1	1
OG0001110	HOG0001155	74	1	1	1	1	1	1	1	1	1	1	1	1	1	1	1	1	1	1	1	1	1	1	1	1	1	1	1	1	1	1	1	1	1	1	1	1	1	1	1	1	1	1	1	1	1	1	1
OG0001111	HOG0001156	74	1	1	1	1	1	1	1	1	1	1	1	1	1	1	1	1	1	1	1	1	1	1	1	1	1	1	1	1	1	1	1	1	1	1	1	1	1	1	1	1	1	1	1	1	1	1	1
OG0001112	HOG0001157	74	1	1	1	1	1	1	1	1	1	1	1	1	1	1	1	1	1	1	1	1	1	1	1	1	1	1	1	1	1	1	1	1	1	1	1	1	1	1	1	1	1	1	1	1	1	1	1
OG0001113	HOG0001158	74	1	1	1	1	1	1	1	1	1	1	1	1	1	1	1	1	1	1	1	1	1	1	1	1	1	1	1	1	1	1	1	1	1	1	1	1	1	1	1	1	1	1	1	1	1	1	1
OG0001114	HOG0001159	74	1	1	1	1	1	1	1	1	1	1	1	1	1	1	1	1	1	1	1	1	1	1	1	1	1	1	1	1	1	1	1	1	1	1	1	1	1	1	1	1	1	1	1	1	1	1	1
OG0001115	HOG0001160	74	1	1	1	1	1	1	1	1	1	1	1	1	1	1	1	1	1	1	1	1	1	1	1	1	1	1	1	1	1	1	1	1	1	1	1	1	1	1	1	1	1	1	1	1	1	1	1
OG0001116	HOG0001161	74	1	1	1	1	1	1	1	1	1	1	1	1	1	1	1	1	1	1	1	1	1	1	1	1	1	1	1	1	1	1	1	1	1	1	1	1	1	1	1	1	1	1	1	1	1	1	1
OG0001117	HOG0001162	74	1	1	1	1	1	1	1	1	1	1	1	1	1	1	1	1	1	1	1	1	1	1	1	1	1	1	1	1	1	1	1	1	1	1	1	1	1	1	1	1	1	1	1	1	1	1	1
OG0001118	HOG0001163	74	1	1	1	1	1	1	1	1	1	1	1	1	1	1	1	1	1	1	1	1	1	1	1	1	1	1	1	1	1	1	1	1	1	1	1	1	1	1	1	1	1	1	1	1	1	1	1
OG0001119	HOG0001164	74	1	1	1	1	1	1	1	1	1	1	1	1	1	1	1	1	1	1	1	1	1	1	1	1	1	1	1	1	1	1	1	1	1	1	1	1	1	1	1	1	1	1	1	1	1	1	1
OG0001120	HOG0001165	74	1	1	1	1	1	1	1	1	1	1	1	1	1	1	1	1	1	1	1	1	1	1	1	1	1	1	1	1	1	1	1	1	1	1	1	1	1	1	1	1	1	1	1	1	1	1	1
OG0001121	HOG0001166	74	1	1	1	1	1	1	1	1	1	1	1	1	1	1	1	1	1	1	1	1	1	1	1	1	1	1	1	1	1	1	1	1	1	1	1	1	1	1	1	1	1	1	1	1	1	1	1
OG0001122	HOG0001167	74	1	1	1	1	1	1	1	1	1	1	1	1	1	1	1	1	1	1	1	1	1	1	1	1	1	1	1	1	1	1	1	1	1	1	1	1	1	1	1	1	1	1	1	1	1	1	1
OG0001123	HOG0001168	74	1	1	1	1	1	1	1	1	1	1	1	1	1	1	1	1	1	1	1	1	1	1	1	1	1	1	1	1	1	1	1	1	1	1	1	1	1	1	1	1	1	1	1	1	1	1	1
OG0001124	HOG0001169	74	1	1	1	1	1	1	1	1	1	1	1	1	1	1	1	1	1	1	1	1	1	1	1	1	1	1	1	1	1	1	1	1	1	1	1	1	1	1	1	1	1	1	1	1	1	1	1
OG0001125	HOG0001170	74	1	1	1	1	1	1	1	1	1	1	1	1	1	1	1	1	1	1	1	1	1	1	1	1	1	1	1	1	1	1	1	1	1	1	1	1	1	1	1	1	1	1	1	1	1	1	1
OG0001126	HOG0001171	74	1	1	1	1	1	1	1	1	1	1	1	1	1	1	1	1	1	1	1	1	1	1	1	1	1	1	1	1	1	1	1	1	1	1	1	1	1	1	1	1	1	1	1	1	1	1	1
OG0001127	HOG0001172	74	1	1	1	1	1	1	1	1	1	1	1	1	1	1	1	1	1	1	1	1	1	1	1	1	1	1	1	1	1	1	1	1	1	1	1	1	1	1	1	1	1	1	1	1	1	1	1
OG0001128	HOG0001173	74	1	1	1	1	1	1	1	1	1	1	1	1	1	1	1	1	1	1	1	1	1	1	1	1	1	1	1	1	1	1	1	1	1	1	1	1	1	1	1	1	1	1	1	1	1	1	1
OG0001129	HOG0001174	74	1	1	1	1	1	1	1	1	1	1	1	1	1	1	1	1	1	1	1	1	1	1	1	1	1	1	1	1	1	1	1	1	1	1	1	1	1	1	1	1	1	1	1	1	1	1	1
OG0001130	HOG0001175	74	1	1	1	1	1	1	1	1	1	1	1	1	1	1	1	1	1	1	1	1	1	1	1	1	1	1	1	1	1	1	1	1	1	1	1	1	1	1	1	1	1	1	1	1	1	1	1
OG0001131	HOG0001176	74	1	1	1	1	1	1	1	1	1	1	1	1	1	1	1	1	1	1	1	1	1	1	1	1	1	1	1	1	1	1	1	1	1	1	1	1	1	1	1	1	1	1	1	1	1	1	1
OG0001132	HOG0001177	74	1	1	1	1	1	1	1	1	1	1	1	1	1	1	1	1	1	1	1	1	1	1	1	1	1	1	1	1	1	1	1	1	1	1	1	1	1	1	1	1	1	1	1	1	1	1	1
OG0001133	HOG0001178	74	1	1	1	1	1	1	1	1	1	1	1	1	1	1	1	1	1	1	1	1	1	1	1	1	1	1	1	1	1	1	1	1	1	1	1	1	1	1	1	1	1	1	1	1	1	1	1
OG0001134	HOG0001179	74	1	1	1	1	1	1	1	1	1	1	1	1	1	1	1	1	1	1	1	1	1	1	1	1	1	1	1	1	1	1	1	1	1	1	1	1	1	1	1	1	1	1	1	1	1	1	1
OG0001135	HOG0001180	74	1	1	1	1	1	1	1	1	1	1	1	1	1	1	1	1	1	1	1	1	1	1	1	1	1	1	1	1	1	1	1	1	1	1	1	1	1	1	1	1	1	1	1	1	1	1	1
OG0001136	HOG0001181	74	1	1	1	1	1	1	1	1	1	1	1	1	1	1	1	1	1	1	1	1	1	1	1	1	1	1	1	1	1	1	1	1	1	1	1	1	1	1	1	1	1	1	1	1	1	1	1
OG0001137	HOG0001182	74	1	1	1	1	1	1	1	1	1	1	1	1	1	1	1	1	1	1	1	1	1	1	1	1	1	1	1	1	1	1	1	1	1	1	1	1	1	1	1	1	1	1	1	1	1	1	1
OG0001138	HOG0001183	74	1	1	1	1	1	1	1	1	1	1	1	1	1	1	1	1	1	1	1	1	1	1	1	1	1	1	1	1	1	1	1	1	1	1	1	1	1	1	1	1	1	1	1	1	1	1	1
OG0001139	HOG0001184	74	1	1	1	1	1	1	1	1	1	1	1	1	1	1	1	1	1	1	1	1	1	1	1	1	1	1	1	1	1	1	1	1	1	1	1	1	1	1	1	1	1	1	1	1	1	1	1
OG0001140	HOG0001185	74	1	1	1	1	1	1	1	1	1	1	1	1	1	1	1	1	1	1	1	1	1	1	1	1	1	1	1	1	1	1	1	1	1	1	1	1	1	1	1	1	1	1	1	1	1	1	1
OG0001141	HOG0001186	74	1	1	1	1	1	1	1	1	1	1	1	1	1	1	1	1	1	1	1	1	1	1	1	1	1	1	1	1	1	1	1	1	1	1	1	1	1	1	1	1	1	1	1	1	1	1	1
OG0001142	HOG0001187	74	1	1	1	1	1	1	1	1	1	1	1	1	1	1	1	1	1	1	1	1	1	1	1	1	1	1	1	1	1	1	1	1	1	1	1	1	1	1	1	1	1	1	1	1	1	1	1
OG0001143	HOG0001188	74	1	1	1	1	1	1	1	1	1	1	1	1	1	1	1	1	1	1	1	1	1	1	1	1	1	1	1	1	1	1	1	1	1	1	1	1	1	1	1	1	1	1	1	1	1	1	1
OG0001144	HOG0001189	74	1	1	1	1	1	1	1	1	1	1	1	1	1	1	1	1	1	1	1	1	1	1	1	1	1	1	1	1	1	1	1	1	1	1	1	1	1	1	1	1	1	1	1	1	1	1	1
OG0001145	HOG0001190	74	1	1	1	1	1	1	1	1	1	1	1	1	1	1	1	1	1	1	1	1	1	1	1	1	1	1	1	1	1	1	1	1	1	1	1	1	1	1	1	1	1	1	1	1	1	1	1
OG0001146	HOG0001191	74	1	1	1	1	1	1	1	1	1	1	1	1	1	1	1	1	1	1	1	1	1	1	1	1	1	1	1	1	1	1	1	1	1	1	1	1	1	1	1	1	1	1	1	1	1	1	1
OG0001147	HOG0001192	74	1	1	1	1	1	1	1	1	1	1	1	1	1	1	1	1	1	1	1	1	1	1	1	1	1	1	1	1	1	1	1	1	1	1	1	1	1	1	1	1	1	1	1	1	1	1	1
OG0001148	HOG0001193	74	1	1	1	1	1	1	1	1	1	1	1	1	1	1	1	1	1	1	1	1	1	1	1	1	1	1	1	1	1	1	1	1	1	1	1	1	1	1	1	1	1	1	1	1	1	1	1
OG0001149	HOG0001194	74	1	1	1	1	1	1	1	1	1	1	1	1	1	1	1	1	1	1	1	1	1	1	1	1	1	1	1	1	1	1	1	1	1	1	1	1	1	1	1	1	1	1	1	1	1	1	1
OG0001150	HOG0001195	74	1	1	1	1	1	1	1	1	1	1	1	1	1	1	1	1	1	1	1	1	1	1	1	1	1	1	1	1	1	1	1	1	1	1	1	1	1	1	1	1	1	1	1	1	1	1	1
OG0001151	HOG0001196	74	1	1	1	1	1	1	1	1	1	1	1	1	1	1	1	1	1	1	1	1	1	1	1	1	1	1	1	1	1	1	1	1	1	1	1	1	1	1	1	1	1	1	1	1	1	1	1
OG0001152	HOG0001197	74	1	1	1	1	1	1	1	1	1	1	1	1	1	1	1	1	1	1	1	1	1	1	1	1	1	1	1	1	1	1	1	1	1	1	1	1	1	1	1	1	1	1	1	1	1	1	1
OG0001153	HOG0001198	74	1	1	1	1	1	1	1	1	1	1	1	1	1	1	1	1	1	1	1	1	1	1	1	1	1	1	1	1	1	1	1	1	1	1	1	1	1	1	1	1	1	1	1	1	1	1	1
OG0001154	HOG0001199	74	1	1	1	1	1	1	1	1	1	1	1	1	1	1	1	1	1	1	1	1	1	1	1	1	1	1	1	1	1	1	1	1	1	1	1	1	1	1	1	1	1	1	1	1	1	1	1
OG0001155	HOG0001200	74	1	1	1	1	1	1	1	1	1	1	1	1	1	1	1	1	1	1	1	1	1	1	1	1	1	1	1	1	1	1	1	1	1	1	1	1	1	1	1	1	1	1	1	1	1	1	1
OG0001156	HOG0001201	74	1	1	1	1	1	1	1	1	1	1	1	1	1	1	1	1	1	1	1	1	1	1	1	1	1	1	1	1	1	1	1	1	1	1	1	1	1	1	1	1	1	1	1	1	1	1	1
OG0001157	HOG0001202	74	1	1	1	1	1	1	1	1	1	1	1	1	1	1	1	1	1	1	1	1	1	1	1	1	1	1	1	1	1	1	1	1	1	1	1	1	1	1	1	1	1	1	1	1	1	1	1
OG0001158	HOG0001203	74	1	1	1	1	1	1	1	1	1	1	1	1	1	1	1	1	1	1	1	1	1	1	1	1	1	1	1	1	1	1	1	1	1	1	1	1	1	1	1	1	1	1	1	1	1	1	1
OG0001159	HOG0001204	74	1	1	1	1	1	1	1	1	1	1	1	1	1	1	1	1	1	1	1	1	1	1	1	1	1	1	1	1	1	1	1	1	1	1	1	1	1	1	1	1	1	1	1	1	1	1	1
OG0001160	HOG0001205	74	1	1	1	1	1	1	1	1	1	1	1	1	1	1	1	1	1	1	1	1	1	1	1	1	1	1	1	1	1	1	1	1	1	1	1	1	1	1	1	1	1	1	1	1	1	1	1
OG0001161	HOG0001206	74	1	1	1	1	1	1	1	1	1	1	1	1	1	1	1	1	1	1	1	1	1	1	1	1	1	1	1	1	1	1	1	1	1	1	1	1	1	1	1	1	1	1	1	1	1	1	1
OG0001162	HOG0001207	74	1	1	1	1	1	1	1	1	1	1	1	1	1	1	1	1	1	1	1	1	1	1	1	1	1	1	1	1	1	1	1	1	1	1	1	1	1	1	1	1	1	1	1	1	1	1	1
OG0001163	HOG0001208	74	1	1	1	1	1	1	1	1	1	1	1	1	1	1	1	1	1	1	1	1	1	1	1	1	1	1	1	1	1	1	1	1	1	1	1	1	1	1	1	1	1	1	1	1	1	1	1
OG0001164	HOG0001209	74	1	1	1	1	1	1	1	1	1	1	1	1	1	1	1	1	1	1	1	1	1	1	1	1	1	1	1	1	1	1	1	1	1	1	1	1	1	1	1	1	1	1	1	1	1	1	1
OG0001165	HOG0001210	74	1	1	1	1	1	1	1	1	1	1	1	1	1	1	1	1	1	1	1	1	1	1	1	1	1	1	1	1	1	1	1	1	1	1	1	1	1	1	1	1	1	1	1	1	1	1	1
OG0001166	HOG0001211	74	1	1	1	1	1	1	1	1	1	1	1	1	1	1	1	1	1	1	1	1	1	1	1	1	1	1	1	1	1	1	1	1	1	1	1	1	1	1	1	1	1	1	1	1	1	1	1
OG0001167	HOG0001212	74	1	1	1	1	1	1	1	1	1	1	1	1	1	1	1	1	1	1	1	1	1	1	1	1	1	1	1	1	1	1	1	1	1	1	1	1	1	1	1	1	1	1	1	1	1	1	1
OG0001168	HOG0001213	73	1	2	1	1	1	1	1	1	1	2	1	1	1	1	1	1	1	1	1	1	1	1	1	1	1	1	1	1	1	1	1	1	1	1	1	1	0	1	1	1	1	1	1	1	1	1	1
OG0001169	HOG0001214	74	1	1	1	1	1	1	1	1	1	1	1	1	1	1	1	1	1	1	1	1	1	1	1	1	1	1	1	1	1	1	1	1	1	1	1	1	1	1	1	1	1	1	1	1	1	1	1
OG0001170	HOG0001215	74	1	1	1	1	1	1	1	1	1	1	1	1	1	1	1	1	1	1	1	1	1	1	1	1	1	1	1	1	1	1	1	1	1	1	1	1	1	1	1	1	1	1	1	1	1	1	1
OG0001171	HOG0001216	74	1	1	1	1	1	1	1	1	1	1	1	1	1	1	1	1	1	1	1	1	1	1	1	1	1	1	1	1	1	1	1	1	1	1	1	1	1	1	1	1	1	1	1	1	1	1	1
OG0001172	HOG0001217	74	1	1	1	1	1	1	1	1	1	1	1	1	1	1	1	1	1	1	1	1	1	1	1	1	1	1	1	1	1	1	1	1	1	1	1	1	1	1	1	1	1	1	1	1	1	1	1
OG0001173	HOG0001218	74	1	1	1	1	1	1	1	1	1	1	1	1	1	1	1	1	1	1	1	1	1	1	1	1	1	1	1	1	1	1	1	1	1	1	1	1	1	1	1	1	1	1	1	1	1	1	1
OG0001174	HOG0001219	74	1	1	1	1	1	1	1	1	1	1	1	1	1	1	1	1	1	1	1	1	1	1	1	1	1	1	1	1	1	1	1	1	1	1	1	1	1	1	1	1	1	1	1	1	1	1	1
OG0001175	HOG0001220	74	1	1	1	1	1	1	1	1	1	1	1	1	1	1	1	1	1	1	1	1	1	1	1	1	1	1	1	1	1	1	1	1	1	1	1	1	1	1	1	1	1	1	1	1	1	1	1
OG0001176	HOG0001221	74	1	1	1	1	1	1	1	1	1	1	1	1	1	1	1	1	1	1	1	1	1	1	1	1	1	1	1	1	1	1	1	1	1	1	1	1	1	1	1	1	1	1	1	1	1	1	1
OG0001177	HOG0001222	74	1	1	1	1	1	1	1	1	1	1	1	1	1	1	1	1	1	1	1	1	1	1	1	1	1	1	1	1	1	1	1	1	1	1	1	1	1	1	1	1	1	1	1	1	1	1	1
OG0001178	HOG0001223	74	1	1	1	1	1	1	1	1	1	1	1	1	1	1	1	1	1	1	1	1	1	1	1	1	1	1	1	1	1	1	1	1	1	1	1	1	1	1	1	1	1	1	1	1	1	1	1
OG0001179	HOG0001224	74	1	1	1	1	1	1	1	1	1	1	1	1	1	1	1	1	1	1	1	1	1	1	1	1	1	1	1	1	1	1	1	1	1	1	1	1	1	1	1	1	1	1	1	1	1	1	1
OG0001180	HOG0001225	74	1	1	1	1	1	1	1	1	1	1	1	1	1	1	1	1	1	1	1	1	1	1	1	1	1	1	1	1	1	1	1	1	1	1	1	1	1	1	1	1	1	1	1	1	1	1	1
OG0001181	HOG0001226	74	1	1	1	1	1	1	1	1	1	1	1	1	1	1	1	1	1	1	1	1	1	1	1	1	1	1	1	1	1	1	1	1	1	1	1	1	1	1	1	1	1	1	1	1	1	1	1
OG0001182	HOG0001227	74	1	1	1	1	1	1	1	1	1	1	1	1	1	1	1	1	1	1	1	1	1	1	1	1	1	1	1	1	1	1	1	1	1	1	1	1	1	1	1	1	1	1	1	1	1	1	1
OG0001183	HOG0001228	74	1	1	1	1	1	1	1	1	1	1	1	1	1	1	1	1	1	1	1	1	1	1	1	1	1	1	1	1	1	1	1	1	1	1	1	1	1	1	1	1	1	1	1	1	1	1	1
OG0001184	HOG0001229	74	1	1	1	1	1	1	1	1	1	1	1	1	1	1	1	1	1	1	1	1	1	1	1	1	1	1	1	1	1	1	1	1	1	1	1	1	1	1	1	1	1	1	1	1	1	1	1
OG0001185	HOG0001230	74	1	1	1	1	1	1	1	1	1	1	1	1	1	1	1	1	1	1	1	1	1	1	1	1	1	1	1	1	1	1	1	1	1	1	1	1	1	1	1	1	1	1	1	1	1	1	1
OG0001186	HOG0001231	74	1	1	1	1	1	1	1	1	1	1	1	1	1	1	1	1	1	1	1	1	1	1	1	1	1	1	1	1	1	1	1	1	1	1	1	1	1	1	1	1	1	1	1	1	1	1	1
OG0001187	HOG0001232	74	1	1	1	1	1	1	1	1	1	1	1	1	1	1	1	1	1	1	1	1	1	1	1	1	1	1	1	1	1	1	1	1	1	1	1	1	1	1	1	1	1	1	1	1	1	1	1
OG0001188	HOG0001233	74	1	1	1	1	1	1	1	1	1	1	1	1	1	1	1	1	1	1	1	1	1	1	1	1	1	1	1	1	1	1	1	1	1	1	1	1	1	1	1	1	1	1	1	1	1	1	1
OG0001189	HOG0001234	74	1	1	1	1	1	1	1	1	1	1	1	1	1	1	1	1	1	1	1	1	1	1	1	1	1	1	1	1	1	1	1	1	1	1	1	1	1	1	1	1	1	1	1	1	1	1	1
OG0001190	HOG0001235	74	1	1	1	1	1	1	1	1	1	1	1	1	1	1	1	1	1	1	1	1	1	1	1	1	1	1	1	1	1	1	1	1	1	1	1	1	1	1	1	1	1	1	1	1	1	1	1
OG0001191	HOG0001236	74	1	1	1	1	1	1	1	1	1	1	1	1	1	1	1	1	1	1	1	1	1	1	1	1	1	1	1	1	1	1	1	1	1	1	1	1	1	1	1	1	1	1	1	1	1	1	1
OG0001192	HOG0001237	74	1	1	1	1	1	1	1	1	1	1	1	1	1	1	1	1	1	1	1	1	1	1	1	1	1	1	1	1	1	1	1	1	1	1	1	1	1	1	1	1	1	1	1	1	1	1	1
OG0001193	HOG0001238	74	1	1	1	1	1	1	1	1	1	1	1	1	1	1	1	1	1	1	1	1	1	1	1	1	1	1	1	1	1	1	1	1	1	1	1	1	1	1	1	1	1	1	1	1	1	1	1
OG0001194	HOG0001239	74	1	1	1	1	1	1	1	1	1	1	1	1	1	1	1	1	1	1	1	1	1	1	1	1	1	1	1	1	1	1	1	1	1	1	1	1	1	1	1	1	1	1	1	1	1	1	1
OG0001195	HOG0001240	74	1	1	1	1	1	1	1	1	1	1	1	1	1	1	1	1	1	1	1	1	1	1	1	1	1	1	1	1	1	1	1	1	1	1	1	1	1	1	1	1	1	1	1	1	1	1	1
OG0001196	HOG0001241	74	1	1	1	1	1	1	1	1	1	1	1	1	1	1	1	1	1	1	1	1	1	1	1	1	1	1	1	1	1	1	1	1	1	1	1	1	1	1	1	1	1	1	1	1	1	1	1
OG0001197	HOG0001242	74	1	1	1	1	1	1	1	1	1	1	1	1	1	1	1	1	1	1	1	1	1	1	1	1	1	1	1	1	1	1	1	1	1	1	1	1	1	1	1	1	1	1	1	1	1	1	1
OG0001198	HOG0001243	74	1	1	1	1	1	1	1	1	1	1	1	1	1	1	1	1	1	1	1	1	1	1	1	1	1	1	1	1	1	1	1	1	1	1	1	1	1	1	1	1	1	1	1	1	1	1	1
OG0001199	HOG0001244	74	1	1	1	1	1	1	1	1	1	1	1	1	1	1	1	1	1	1	1	1	1	1	1	1	1	1	1	1	1	1	1	1	1	1	1	1	1	1	1	1	1	1	1	1	1	1	1
OG0001200	HOG0001245	74	1	1	1	1	1	1	1	1	1	1	1	1	1	1	1	1	1	1	1	1	1	1	1	1	1	1	1	1	1	1	1	1	1	1	1	1	1	1	1	1	1	1	1	1	1	1	1
OG0001201	HOG0001246	74	1	1	1	1	1	1	1	1	1	1	1	1	1	1	1	1	1	1	1	1	1	1	1	1	1	1	1	1	1	1	1	1	1	1	1	1	1	1	1	1	1	1	1	1	1	1	1
OG0001202	HOG0001247	74	1	1	1	1	1	1	1	1	1	1	1	1	1	1	1	1	1	1	1	1	1	1	1	1	1	1	1	1	1	1	1	1	1	1	1	1	1	1	1	1	1	1	1	1	1	1	1
OG0001203	HOG0001248	74	1	1	1	1	1	1	1	1	1	1	1	1	1	1	1	1	1	1	1	1	1	1	1	1	1	1	1	1	1	1	1	1	1	1	1	1	1	1	1	1	1	1	1	1	1	1	1
OG0001204	HOG0001249	74	1	1	1	1	1	1	1	1	1	1	1	1	1	1	1	1	1	1	1	1	1	1	1	1	1	1	1	1	1	1	1	1	1	1	1	1	1	1	1	1	1	1	1	1	1	1	1
OG0001205	HOG0001250	74	1	1	1	1	1	1	1	1	1	1	1	1	1	1	1	1	1	1	1	1	1	1	1	1	1	1	1	1	1	1	1	1	1	1	1	1	1	1	1	1	1	1	1	1	1	1	1
OG0001206	HOG0001251	74	1	1	1	1	1	1	1	1	1	1	1	1	1	1	1	1	1	1	1	1	1	1	1	1	1	1	1	1	1	1	1	1	1	1	1	1	1	1	1	1	1	1	1	1	1	1	1
OG0001207	HOG0001252	74	1	1	1	1	1	1	1	1	1	1	1	1	1	1	1	1	1	1	1	1	1	1	1	1	1	1	1	1	1	1	1	1	1	1	1	1	1	1	1	1	1	1	1	1	1	1	1
OG0001208	HOG0001253	74	1	1	1	1	1	1	1	1	1	1	1	1	1	1	1	1	1	1	1	1	1	1	1	1	1	1	1	1	1	1	1	1	1	1	1	1	1	1	1	1	1	1	1	1	1	1	1
OG0001209	HOG0001254	74	1	1	1	1	1	1	1	1	1	1	1	1	1	1	1	1	1	1	1	1	1	1	1	1	1	1	1	1	1	1	1	1	1	1	1	1	1	1	1	1	1	1	1	1	1	1	1
OG0001210	HOG0001255	74	1	1	1	1	1	1	1	1	1	1	1	1	1	1	1	1	1	1	1	1	1	1	1	1	1	1	1	1	1	1	1	1	1	1	1	1	1	1	1	1	1	1	1	1	1	1	1
OG0001211	HOG0001256	74	1	1	1	1	1	1	1	1	1	1	1	1	1	1	1	1	1	1	1	1	1	1	1	1	1	1	1	1	1	1	1	1	1	1	1	1	1	1	1	1	1	1	1	1	1	1	1
OG0001212	HOG0001257	74	1	1	1	1	1	1	1	1	1	1	1	1	1	1	1	1	1	1	1	1	1	1	1	1	1	1	1	1	1	1	1	1	1	1	1	1	1	1	1	1	1	1	1	1	1	1	1
OG0001213	HOG0001258	74	1	1	1	1	1	1	1	1	1	1	1	1	1	1	1	1	1	1	1	1	1	1	1	1	1	1	1	1	1	1	1	1	1	1	1	1	1	1	1	1	1	1	1	1	1	1	1
OG0001214	HOG0001259	74	1	1	1	1	1	1	1	1	1	1	1	1	1	1	1	1	1	1	1	1	1	1	1	1	1	1	1	1	1	1	1	1	1	1	1	1	1	1	1	1	1	1	1	1	1	1	1
OG0001215	HOG0001260	74	1	1	1	1	1	1	1	1	1	1	1	1	1	1	1	1	1	1	1	1	1	1	1	1	1	1	1	1	1	1	1	1	1	1	1	1	1	1	1	1	1	1	1	1	1	1	1
OG0001216	HOG0001261	74	1	1	1	1	1	1	1	1	1	1	1	1	1	1	1	1	1	1	1	1	1	1	1	1	1	1	1	1	1	1	1	1	1	1	1	1	1	1	1	1	1	1	1	1	1	1	1
OG0001217	HOG0001262	74	1	1	1	1	1	1	1	1	1	1	1	1	1	1	1	1	1	1	1	1	1	1	1	1	1	1	1	1	1	1	1	1	1	1	1	1	1	1	1	1	1	1	1	1	1	1	1
OG0001218	HOG0001263	74	1	1	1	1	1	1	1	1	1	1	1	1	1	1	1	1	1	1	1	1	1	1	1	1	1	1	1	1	1	1	1	1	1	1	1	1	1	1	1	1	1	1	1	1	1	1	1
OG0001219	HOG0001264	74	1	1	1	1	1	1	1	1	1	1	1	1	1	1	1	1	1	1	1	1	1	1	1	1	1	1	1	1	1	1	1	1	1	1	1	1	1	1	1	1	1	1	1	1	1	1	1
OG0001220	HOG0001265	74	1	1	1	1	1	1	1	1	1	1	1	1	1	1	1	1	1	1	1	1	1	1	1	1	1	1	1	1	1	1	1	1	1	1	1	1	1	1	1	1	1	1	1	1	1	1	1
OG0001221	HOG0001266	74	1	1	1	1	1	1	1	1	1	1	1	1	1	1	1	1	1	1	1	1	1	1	1	1	1	1	1	1	1	1	1	1	1	1	1	1	1	1	1	1	1	1	1	1	1	1	1
OG0001222	HOG0001267	74	1	1	1	1	1	1	1	1	1	1	1	1	1	1	1	1	1	1	1	1	1	1	1	1	1	1	1	1	1	1	1	1	1	1	1	1	1	1	1	1	1	1	1	1	1	1	1
OG0001223	HOG0001268	74	1	1	1	1	1	1	1	1	1	1	1	1	1	1	1	1	1	1	1	1	1	1	1	1	1	1	1	1	1	1	1	1	1	1	1	1	1	1	1	1	1	1	1	1	1	1	1
OG0001224	HOG0001269	74	1	1	1	1	1	1	1	1	1	1	1	1	1	1	1	1	1	1	1	1	1	1	1	1	1	1	1	1	1	1	1	1	1	1	1	1	1	1	1	1	1	1	1	1	1	1	1
OG0001225	HOG0001270	74	1	1	1	1	1	1	1	1	1	1	1	1	1	1	1	1	1	1	1	1	1	1	1	1	1	1	1	1	1	1	1	1	1	1	1	1	1	1	1	1	1	1	1	1	1	1	1
OG0001226	HOG0001271	74	1	1	1	1	1	1	1	1	1	1	1	1	1	1	1	1	1	1	1	1	1	1	1	1	1	1	1	1	1	1	1	1	1	1	1	1	1	1	1	1	1	1	1	1	1	1	1
OG0001227	HOG0001272	74	1	1	1	1	1	1	1	1	1	1	1	1	1	1	1	1	1	1	1	1	1	1	1	1	1	1	1	1	1	1	1	1	1	1	1	1	1	1	1	1	1	1	1	1	1	1	1
OG0001228	HOG0001273	74	1	1	1	1	1	1	1	1	1	1	1	1	1	1	1	1	1	1	1	1	1	1	1	1	1	1	1	1	1	1	1	1	1	1	1	1	1	1	1	1	1	1	1	1	1	1	1
OG0001229	HOG0001274	74	1	1	1	1	1	1	1	1	1	1	1	1	1	1	1	1	1	1	1	1	1	1	1	1	1	1	1	1	1	1	1	1	1	1	1	1	1	1	1	1	1	1	1	1	1	1	1
OG0001230	HOG0001275	74	1	1	1	1	1	1	1	1	1	1	1	1	1	1	1	1	1	1	1	1	1	1	1	1	1	1	1	1	1	1	1	1	1	1	1	1	1	1	1	1	1	1	1	1	1	1	1
OG0001231	HOG0001276	74	1	1	1	1	1	1	1	1	1	1	1	1	1	1	1	1	1	1	1	1	1	1	1	1	1	1	1	1	1	1	1	1	1	1	1	1	1	1	1	1	1	1	1	1	1	1	1
OG0001232	HOG0001277	74	1	1	1	1	1	1	1	1	1	1	1	1	1	1	1	1	1	1	1	1	1	1	1	1	1	1	1	1	1	1	1	1	1	1	1	1	1	1	1	1	1	1	1	1	1	1	1
OG0001233	HOG0001278	74	1	1	1	1	1	1	1	1	1	1	1	1	1	1	1	1	1	1	1	1	1	1	1	1	1	1	1	1	1	1	1	1	1	1	1	1	1	1	1	1	1	1	1	1	1	1	1
OG0001234	HOG0001279	74	1	1	1	1	1	1	1	1	1	1	1	1	1	1	1	1	1	1	1	1	1	1	1	1	1	1	1	1	1	1	1	1	1	1	1	1	1	1	1	1	1	1	1	1	1	1	1
OG0001235	HOG0001280	74	1	1	1	1	1	1	1	1	1	1	1	1	1	1	1	1	1	1	1	1	1	1	1	1	1	1	1	1	1	1	1	1	1	1	1	1	1	1	1	1	1	1	1	1	1	1	1
OG0001236	HOG0001281	74	1	1	1	1	1	1	1	1	1	1	1	1	1	1	1	1	1	1	1	1	1	1	1	1	1	1	1	1	1	1	1	1	1	1	1	1	1	1	1	1	1	1	1	1	1	1	1
OG0001237	HOG0001282	74	1	1	1	1	1	1	1	1	1	1	1	1	1	1	1	1	1	1	1	1	1	1	1	1	1	1	1	1	1	1	1	1	1	1	1	1	1	1	1	1	1	1	1	1	1	1	1
OG0001238	HOG0001283	74	1	1	1	1	1	1	1	1	1	1	1	1	1	1	1	1	1	1	1	1	1	1	1	1	1	1	1	1	1	1	1	1	1	1	1	1	1	1	1	1	1	1	1	1	1	1	1
OG0001239	HOG0001284	74	1	1	1	1	1	1	1	1	1	1	1	1	1	1	1	1	1	1	1	1	1	1	1	1	1	1	1	1	1	1	1	1	1	1	1	1	1	1	1	1	1	1	1	1	1	1	1
OG0001240	HOG0001285	74	1	1	1	1	1	1	1	1	1	1	1	1	1	1	1	1	1	1	1	1	1	1	1	1	1	1	1	1	1	1	1	1	1	1	1	1	1	1	1	1	1	1	1	1	1	1	1
OG0001241	HOG0001286	74	1	1	1	1	1	1	1	1	1	1	1	1	1	1	1	1	1	1	1	1	1	1	1	1	1	1	1	1	1	1	1	1	1	1	1	1	1	1	1	1	1	1	1	1	1	1	1
OG0001242	HOG0001287	74	1	1	1	1	1	1	1	1	1	1	1	1	1	1	1	1	1	1	1	1	1	1	1	1	1	1	1	1	1	1	1	1	1	1	1	1	1	1	1	1	1	1	1	1	1	1	1
OG0001243	HOG0001288	74	1	1	1	1	1	1	1	1	1	1	1	1	1	1	1	1	1	1	1	1	1	1	1	1	1	1	1	1	1	1	1	1	1	1	1	1	1	1	1	1	1	1	1	1	1	1	1
OG0001244	HOG0001289	74	1	1	1	1	1	1	1	1	1	1	1	1	1	1	1	1	1	1	1	1	1	1	1	1	1	1	1	1	1	1	1	1	1	1	1	1	1	1	1	1	1	1	1	1	1	1	1
OG0001245	HOG0001290	74	1	1	1	1	1	1	1	1	1	1	1	1	1	1	1	1	1	1	1	1	1	1	1	1	1	1	1	1	1	1	1	1	1	1	1	1	1	1	1	1	1	1	1	1	1	1	1
OG0001246	HOG0001291	74	1	1	1	1	1	1	1	1	1	1	1	1	1	1	1	1	1	1	1	1	1	1	1	1	1	1	1	1	1	1	1	1	1	1	1	1	1	1	1	1	1	1	1	1	1	1	1
OG0001247	HOG0001292	74	1	1	1	1	1	1	1	1	1	1	1	1	1	1	1	1	1	1	1	1	1	1	1	1	1	1	1	1	1	1	1	1	1	1	1	1	1	1	1	1	1	1	1	1	1	1	1
OG0001248	HOG0001293	74	1	1	1	1	1	1	1	1	1	1	1	1	1	1	1	1	1	1	1	1	1	1	1	1	1	1	1	1	1	1	1	1	1	1	1	1	1	1	1	1	1	1	1	1	1	1	1
OG0001249	HOG0001294	74	1	1	1	1	1	1	1	1	1	1	1	1	1	1	1	1	1	1	1	1	1	1	1	1	1	1	1	1	1	1	1	1	1	1	1	1	1	1	1	1	1	1	1	1	1	1	1
OG0001250	HOG0001295	74	1	1	1	1	1	1	1	1	1	1	1	1	1	1	1	1	1	1	1	1	1	1	1	1	1	1	1	1	1	1	1	1	1	1	1	1	1	1	1	1	1	1	1	1	1	1	1
OG0001251	HOG0001296	74	1	1	1	1	1	1	1	1	1	1	1	1	1	1	1	1	1	1	1	1	1	1	1	1	1	1	1	1	1	1	1	1	1	1	1	1	1	1	1	1	1	1	1	1	1	1	1
OG0001252	HOG0001297	74	1	1	1	1	1	1	1	1	1	1	1	1	1	1	1	1	1	1	1	1	1	1	1	1	1	1	1	1	1	1	1	1	1	1	1	1	1	1	1	1	1	1	1	1	1	1	1
OG0001253	HOG0001298	74	1	1	1	1	1	1	1	1	1	1	1	1	1	1	1	1	1	1	1	1	1	1	1	1	1	1	1	1	1	1	1	1	1	1	1	1	1	1	1	1	1	1	1	1	1	1	1
OG0001254	HOG0001299	74	1	1	1	1	1	1	1	1	1	1	1	1	1	1	1	1	1	1	1	1	1	1	1	1	1	1	1	1	1	1	1	1	1	1	1	1	1	1	1	1	1	1	1	1	1	1	1
OG0001255	HOG0001300	74	1	1	1	1	1	1	1	1	1	1	1	1	1	1	1	1	1	1	1	1	1	1	1	1	1	1	1	1	1	1	1	1	1	1	1	1	1	1	1	1	1	1	1	1	1	1	1
OG0001256	HOG0001301	74	1	1	1	1	1	1	1	1	1	1	1	1	1	1	1	1	1	1	1	1	1	1	1	1	1	1	1	1	1	1	1	1	1	1	1	1	1	1	1	1	1	1	1	1	1	1	1
OG0001257	HOG0001302	74	1	1	1	1	1	1	1	1	1	1	1	1	1	1	1	1	1	1	1	1	1	1	1	1	1	1	1	1	1	1	1	1	1	1	1	1	1	1	1	1	1	1	1	1	1	1	1
OG0001258	HOG0001303	74	1	1	1	1	1	1	1	1	1	1	1	1	1	1	1	1	1	1	1	1	1	1	1	1	1	1	1	1	1	1	1	1	1	1	1	1	1	1	1	1	1	1	1	1	1	1	1
OG0001259	HOG0001304	74	1	1	1	1	1	1	1	1	1	1	1	1	1	1	1	1	1	1	1	1	1	1	1	1	1	1	1	1	1	1	1	1	1	1	1	1	1	1	1	1	1	1	1	1	1	1	1
OG0001260	HOG0001305	74	1	1	1	1	1	1	1	1	1	1	1	1	1	1	1	1	1	1	1	1	1	1	1	1	1	1	1	1	1	1	1	1	1	1	1	1	1	1	1	1	1	1	1	1	1	1	1
OG0001261	HOG0001306	74	1	1	1	1	1	1	1	1	1	1	1	1	1	1	1	1	1	1	1	1	1	1	1	1	1	1	1	1	1	1	1	1	1	1	1	1	1	1	1	1	1	1	1	1	1	1	1
OG0001262	HOG0001307	74	1	1	1	1	1	1	1	1	1	1	1	1	1	1	1	1	1	1	1	1	1	1	1	1	1	1	1	1	1	1	1	1	1	1	1	1	1	1	1	1	1	1	1	1	1	1	1
OG0001263	HOG0001308	74	1	1	1	1	1	1	1	1	1	1	1	1	1	1	1	1	1	1	1	1	1	1	1	1	1	1	1	1	1	1	1	1	1	1	1	1	1	1	1	1	1	1	1	1	1	1	1
OG0001264	HOG0001309	74	1	1	1	1	1	1	1	1	1	1	1	1	1	1	1	1	1	1	1	1	1	1	1	1	1	1	1	1	1	1	1	1	1	1	1	1	1	1	1	1	1	1	1	1	1	1	1
OG0001265	HOG0001310	74	1	1	1	1	1	1	1	1	1	1	1	1	1	1	1	1	1	1	1	1	1	1	1	1	1	1	1	1	1	1	1	1	1	1	1	1	1	1	1	1	1	1	1	1	1	1	1
OG0001266	HOG0001311	74	1	1	1	1	1	1	1	1	1	1	1	1	1	1	1	1	1	1	1	1	1	1	1	1	1	1	1	1	1	1	1	1	1	1	1	1	1	1	1	1	1	1	1	1	1	1	1
OG0001267	HOG0001312	74	1	1	1	1	1	1	1	1	1	1	1	1	1	1	1	1	1	1	1	1	1	1	1	1	1	1	1	1	1	1	1	1	1	1	1	1	1	1	1	1	1	1	1	1	1	1	1
OG0001268	HOG0001313	74	1	1	1	1	1	1	1	1	1	1	1	1	1	1	1	1	1	1	1	1	1	1	1	1	1	1	1	1	1	1	1	1	1	1	1	1	1	1	1	1	1	1	1	1	1	1	1
OG0001269	HOG0001314	74	1	1	1	1	1	1	1	1	1	1	1	1	1	1	1	1	1	1	1	1	1	1	1	1	1	1	1	1	1	1	1	1	1	1	1	1	1	1	1	1	1	1	1	1	1	1	1
OG0001270	HOG0001315	74	1	1	1	1	1	1	1	1	1	1	1	1	1	1	1	1	1	1	1	1	1	1	1	1	1	1	1	1	1	1	1	1	1	1	1	1	1	1	1	1	1	1	1	1	1	1	1
OG0001271	HOG0001316	74	1	1	1	1	1	1	1	1	1	1	1	1	1	1	1	1	1	1	1	1	1	1	1	1	1	1	1	1	1	1	1	1	1	1	1	1	1	1	1	1	1	1	1	1	1	1	1
OG0001272	HOG0001317	74	1	1	1	1	1	1	1	1	1	1	1	1	1	1	1	1	1	1	1	1	1	1	1	1	1	1	1	1	1	1	1	1	1	1	1	1	1	1	1	1	1	1	1	1	1	1	1
OG0001273	HOG0001318	74	1	1	1	1	1	1	1	1	1	1	1	1	1	1	1	1	1	1	1	1	1	1	1	1	1	1	1	1	1	1	1	1	1	1	1	1	1	1	1	1	1	1	1	1	1	1	1
OG0001274	HOG0001319	74	1	1	1	1	1	1	1	1	1	1	1	1	1	1	1	1	1	1	1	1	1	1	1	1	1	1	1	1	1	1	1	1	1	1	1	1	1	1	1	1	1	1	1	1	1	1	1
OG0001275	HOG0001320	74	1	1	1	1	1	1	1	1	1	1	1	1	1	1	1	1	1	1	1	1	1	1	1	1	1	1	1	1	1	1	1	1	1	1	1	1	1	1	1	1	1	1	1	1	1	1	1
OG0001276	HOG0001321	74	1	1	1	1	1	1	1	1	1	1	1	1	1	1	1	1	1	1	1	1	1	1	1	1	1	1	1	1	1	1	1	1	1	1	1	1	1	1	1	1	1	1	1	1	1	1	1
OG0001277	HOG0001322	74	1	1	1	1	1	1	1	1	1	1	1	1	1	1	1	1	1	1	1	1	1	1	1	1	1	1	1	1	1	1	1	1	1	1	1	1	1	1	1	1	1	1	1	1	1	1	1
OG0001278	HOG0001323	74	1	1	1	1	1	1	1	1	1	1	1	1	1	1	1	1	1	1	1	1	1	1	1	1	1	1	1	1	1	1	1	1	1	1	1	1	1	1	1	1	1	1	1	1	1	1	1
OG0001279	HOG0001324	74	1	1	1	1	1	1	1	1	1	1	1	1	1	1	1	1	1	1	1	1	1	1	1	1	1	1	1	1	1	1	1	1	1	1	1	1	1	1	1	1	1	1	1	1	1	1	1
OG0001280	HOG0001325	74	1	1	1	1	1	1	1	1	1	1	1	1	1	1	1	1	1	1	1	1	1	1	1	1	1	1	1	1	1	1	1	1	1	1	1	1	1	1	1	1	1	1	1	1	1	1	1
OG0001281	HOG0001326	74	1	1	1	1	1	1	1	1	1	1	1	1	1	1	1	1	1	1	1	1	1	1	1	1	1	1	1	1	1	1	1	1	1	1	1	1	1	1	1	1	1	1	1	1	1	1	1
OG0001282	HOG0001327	74	1	1	1	1	1	1	1	1	1	1	1	1	1	1	1	1	1	1	1	1	1	1	1	1	1	1	1	1	1	1	1	1	1	1	1	1	1	1	1	1	1	1	1	1	1	1	1
OG0001283	HOG0001328	74	1	1	1	1	1	1	1	1	1	1	1	1	1	1	1	1	1	1	1	1	1	1	1	1	1	1	1	1	1	1	1	1	1	1	1	1	1	1	1	1	1	1	1	1	1	1	1
OG0001284	HOG0001329	74	1	1	1	1	1	1	1	1	1	1	1	1	1	1	1	1	1	1	1	1	1	1	1	1	1	1	1	1	1	1	1	1	1	1	1	1	1	1	1	1	1	1	1	1	1	1	1
OG0001285	HOG0001330	74	1	1	1	1	1	1	1	1	1	1	1	1	1	1	1	1	1	1	1	1	1	1	1	1	1	1	1	1	1	1	1	1	1	1	1	1	1	1	1	1	1	1	1	1	1	1	1
OG0001286	HOG0001331	74	1	1	1	1	1	1	1	1	1	1	1	1	1	1	1	1	1	1	1	1	1	1	1	1	1	1	1	1	1	1	1	1	1	1	1	1	1	1	1	1	1	1	1	1	1	1	1
OG0001287	HOG0001332	74	1	1	1	1	1	1	1	1	1	1	1	1	1	1	1	1	1	1	1	1	1	1	1	1	1	1	1	1	1	1	1	1	1	1	1	1	1	1	1	1	1	1	1	1	1	1	1
OG0001288	HOG0001333	74	1	1	1	1	1	1	1	1	1	1	1	1	1	1	1	1	1	1	1	1	1	1	1	1	1	1	1	1	1	1	1	1	1	1	1	1	1	1	1	1	1	1	1	1	1	1	1
OG0001289	HOG0001334	74	1	1	1	1	1	1	1	1	1	1	1	1	1	1	1	1	1	1	1	1	1	1	1	1	1	1	1	1	1	1	1	1	1	1	1	1	1	1	1	1	1	1	1	1	1	1	1
OG0001290	HOG0001335	74	1	1	1	1	1	1	1	1	1	1	1	1	1	1	1	1	1	1	1	1	1	1	1	1	1	1	1	1	1	1	1	1	1	1	1	1	1	1	1	1	1	1	1	1	1	1	1
OG0001291	HOG0001336	74	1	1	1	1	1	1	1	1	1	1	1	1	1	1	1	1	1	1	1	1	1	1	1	1	1	1	1	1	1	1	1	1	1	1	1	1	1	1	1	1	1	1	1	1	1	1	1
OG0001292	HOG0001337	74	1	1	1	1	1	1	1	1	1	1	1	1	1	1	1	1	1	1	1	1	1	1	1	1	1	1	1	1	1	1	1	1	1	1	1	1	1	1	1	1	1	1	1	1	1	1	1
OG0001293	HOG0001338	74	1	1	1	1	1	1	1	1	1	1	1	1	1	1	1	1	1	1	1	1	1	1	1	1	1	1	1	1	1	1	1	1	1	1	1	1	1	1	1	1	1	1	1	1	1	1	1
OG0001294	HOG0001339	74	1	1	1	1	1	1	1	1	1	1	1	1	1	1	1	1	1	1	1	1	1	1	1	1	1	1	1	1	1	1	1	1	1	1	1	1	1	1	1	1	1	1	1	1	1	1	1
OG0001295	HOG0001340	74	1	1	1	1	1	1	1	1	1	1	1	1	1	1	1	1	1	1	1	1	1	1	1	1	1	1	1	1	1	1	1	1	1	1	1	1	1	1	1	1	1	1	1	1	1	1	1
OG0001296	HOG0001341	74	1	1	1	1	1	1	1	1	1	1	1	1	1	1	1	1	1	1	1	1	1	1	1	1	1	1	1	1	1	1	1	1	1	1	1	1	1	1	1	1	1	1	1	1	1	1	1
OG0001297	HOG0001342	74	1	1	1	1	1	1	1	1	1	1	1	1	1	1	1	1	1	1	1	1	1	1	1	1	1	1	1	1	1	1	1	1	1	1	1	1	1	1	1	1	1	1	1	1	1	1	1
OG0001298	HOG0001343	74	1	1	1	1	1	1	1	1	1	1	1	1	1	1	1	1	1	1	1	1	1	1	1	1	1	1	1	1	1	1	1	1	1	1	1	1	1	1	1	1	1	1	1	1	1	1	1
OG0001299	HOG0001344	74	1	1	1	1	1	1	1	1	1	1	1	1	1	1	1	1	1	1	1	1	1	1	1	1	1	1	1	1	1	1	1	1	1	1	1	1	1	1	1	1	1	1	1	1	1	1	1
OG0001300	HOG0001345	74	1	1	1	1	1	1	1	1	1	1	1	1	1	1	1	1	1	1	1	1	1	1	1	1	1	1	1	1	1	1	1	1	1	1	1	1	1	1	1	1	1	1	1	1	1	1	1
OG0001301	HOG0001346	74	1	1	1	1	1	1	1	1	1	1	1	1	1	1	1	1	1	1	1	1	1	1	1	1	1	1	1	1	1	1	1	1	1	1	1	1	1	1	1	1	1	1	1	1	1	1	1
OG0001302	HOG0001347	74	1	1	1	1	1	1	1	1	1	1	1	1	1	1	1	1	1	1	1	1	1	1	1	1	1	1	1	1	1	1	1	1	1	1	1	1	1	1	1	1	1	1	1	1	1	1	1
OG0001303	HOG0001348	74	1	1	1	1	1	1	1	1	1	1	1	1	1	1	1	1	1	1	1	1	1	1	1	1	1	1	1	1	1	1	1	1	1	1	1	1	1	1	1	1	1	1	1	1	1	1	1
OG0001304	HOG0001349	74	1	1	1	1	1	1	1	1	1	1	1	1	1	1	1	1	1	1	1	1	1	1	1	1	1	1	1	1	1	1	1	1	1	1	1	1	1	1	1	1	1	1	1	1	1	1	1
OG0001305	HOG0001350	74	1	1	1	1	1	1	1	1	1	1	1	1	1	1	1	1	1	1	1	1	1	1	1	1	1	1	1	1	1	1	1	1	1	1	1	1	1	1	1	1	1	1	1	1	1	1	1
OG0001306	HOG0001351	74	1	1	1	1	1	1	1	1	1	1	1	1	1	1	1	1	1	1	1	1	1	1	1	1	1	1	1	1	1	1	1	1	1	1	1	1	1	1	1	1	1	1	1	1	1	1	1
OG0001307	HOG0001352	74	1	1	1	1	1	1	1	1	1	1	1	1	1	1	1	1	1	1	1	1	1	1	1	1	1	1	1	1	1	1	1	1	1	1	1	1	1	1	1	1	1	1	1	1	1	1	1
OG0001308	HOG0001353	74	1	1	1	1	1	1	1	1	1	1	1	1	1	1	1	1	1	1	1	1	1	1	1	1	1	1	1	1	1	1	1	1	1	1	1	1	1	1	1	1	1	1	1	1	1	1	1
OG0001309	HOG0001354	74	1	1	1	1	1	1	1	1	1	1	1	1	1	1	1	1	1	1	1	1	1	1	1	1	1	1	1	1	1	1	1	1	1	1	1	1	1	1	1	1	1	1	1	1	1	1	1
OG0001310	HOG0001355	74	1	1	1	1	1	1	1	1	1	1	1	1	1	1	1	1	1	1	1	1	1	1	1	1	1	1	1	1	1	1	1	1	1	1	1	1	1	1	1	1	1	1	1	1	1	1	1
OG0001311	HOG0001356	74	1	1	1	1	1	1	1	1	1	1	1	1	1	1	1	1	1	1	1	1	1	1	1	1	1	1	1	1	1	1	1	1	1	1	1	1	1	1	1	1	1	1	1	1	1	1	1
OG0001312	HOG0001357	74	1	1	1	1	1	1	1	1	1	1	1	1	1	1	1	1	1	1	1	1	1	1	1	1	1	1	1	1	1	1	1	1	1	1	1	1	1	1	1	1	1	1	1	1	1	1	1
OG0001313	HOG0001358	74	1	1	1	1	1	1	1	1	1	1	1	1	1	1	1	1	1	1	1	1	1	1	1	1	1	1	1	1	1	1	1	1	1	1	1	1	1	1	1	1	1	1	1	1	1	1	1
OG0001314	HOG0001359	74	1	1	1	1	1	1	1	1	1	1	1	1	1	1	1	1	1	1	1	1	1	1	1	1	1	1	1	1	1	1	1	1	1	1	1	1	1	1	1	1	1	1	1	1	1	1	1
OG0001315	HOG0001360	74	1	1	1	1	1	1	1	1	1	1	1	1	1	1	1	1	1	1	1	1	1	1	1	1	1	1	1	1	1	1	1	1	1	1	1	1	1	1	1	1	1	1	1	1	1	1	1
OG0001316	HOG0001361	74	1	1	1	1	1	1	1	1	1	1	1	1	1	1	1	1	1	1	1	1	1	1	1	1	1	1	1	1	1	1	1	1	1	1	1	1	1	1	1	1	1	1	1	1	1	1	1
OG0001317	HOG0001362	74	1	1	1	1	1	1	1	1	1	1	1	1	1	1	1	1	1	1	1	1	1	1	1	1	1	1	1	1	1	1	1	1	1	1	1	1	1	1	1	1	1	1	1	1	1	1	1
OG0001318	HOG0001363	74	1	1	1	1	1	1	1	1	1	1	1	1	1	1	1	1	1	1	1	1	1	1	1	1	1	1	1	1	1	1	1	1	1	1	1	1	1	1	1	1	1	1	1	1	1	1	1
OG0001319	HOG0001364	74	1	1	1	1	1	1	1	1	1	1	1	1	1	1	1	1	1	1	1	1	1	1	1	1	1	1	1	1	1	1	1	1	1	1	1	1	1	1	1	1	1	1	1	1	1	1	1
OG0001320	HOG0001365	74	1	1	1	1	1	1	1	1	1	1	1	1	1	1	1	1	1	1	1	1	1	1	1	1	1	1	1	1	1	1	1	1	1	1	1	1	1	1	1	1	1	1	1	1	1	1	1
OG0001321	HOG0001366	74	1	1	1	1	1	1	1	1	1	1	1	1	1	1	1	1	1	1	1	1	1	1	1	1	1	1	1	1	1	1	1	1	1	1	1	1	1	1	1	1	1	1	1	1	1	1	1
OG0001322	HOG0001367	74	1	1	1	1	1	1	1	1	1	1	1	1	1	1	1	1	1	1	1	1	1	1	1	1	1	1	1	1	1	1	1	1	1	1	1	1	1	1	1	1	1	1	1	1	1	1	1
OG0001323	HOG0001368	74	1	1	1	1	1	1	1	1	1	1	1	1	1	1	1	1	1	1	1	1	1	1	1	1	1	1	1	1	1	1	1	1	1	1	1	1	1	1	1	1	1	1	1	1	1	1	1
OG0001324	HOG0001369	74	1	1	1	1	1	1	1	1	1	1	1	1	1	1	1	1	1	1	1	1	1	1	1	1	1	1	1	1	1	1	1	1	1	1	1	1	1	1	1	1	1	1	1	1	1	1	1
OG0001325	HOG0001370	74	1	1	1	1	1	1	1	1	1	1	1	1	1	1	1	1	1	1	1	1	1	1	1	1	1	1	1	1	1	1	1	1	1	1	1	1	1	1	1	1	1	1	1	1	1	1	1
OG0001326	HOG0001371	74	1	1	1	1	1	1	1	1	1	1	1	1	1	1	1	1	1	1	1	1	1	1	1	1	1	1	1	1	1	1	1	1	1	1	1	1	1	1	1	1	1	1	1	1	1	1	1
OG0001327	HOG0001372	74	1	1	1	1	1	1	1	1	1	1	1	1	1	1	1	1	1	1	1	1	1	1	1	1	1	1	1	1	1	1	1	1	1	1	1	1	1	1	1	1	1	1	1	1	1	1	1
OG0001328	HOG0001373	74	1	1	1	1	1	1	1	1	1	1	1	1	1	1	1	1	1	1	1	1	1	1	1	1	1	1	1	1	1	1	1	1	1	1	1	1	1	1	1	1	1	1	1	1	1	1	1
OG0001329	HOG0001374	74	1	1	1	1	1	1	1	1	1	1	1	1	1	1	1	1	1	1	1	1	1	1	1	1	1	1	1	1	1	1	1	1	1	1	1	1	1	1	1	1	1	1	1	1	1	1	1
OG0001330	HOG0001375	74	1	1	1	1	1	1	1	1	1	1	1	1	1	1	1	1	1	1	1	1	1	1	1	1	1	1	1	1	1	1	1	1	1	1	1	1	1	1	1	1	1	1	1	1	1	1	1
OG0001331	HOG0001376	74	1	1	1	1	1	1	1	1	1	1	1	1	1	1	1	1	1	1	1	1	1	1	1	1	1	1	1	1	1	1	1	1	1	1	1	1	1	1	1	1	1	1	1	1	1	1	1
OG0001332	HOG0001377	74	1	1	1	1	1	1	1	1	1	1	1	1	1	1	1	1	1	1	1	1	1	1	1	1	1	1	1	1	1	1	1	1	1	1	1	1	1	1	1	1	1	1	1	1	1	1	1
OG0001333	HOG0001378	74	1	1	1	1	1	1	1	1	1	1	1	1	1	1	1	1	1	1	1	1	1	1	1	1	1	1	1	1	1	1	1	1	1	1	1	1	1	1	1	1	1	1	1	1	1	1	1
OG0001334	HOG0001379	74	1	1	1	1	1	1	1	1	1	1	1	1	1	1	1	1	1	1	1	1	1	1	1	1	1	1	1	1	1	1	1	1	1	1	1	1	1	1	1	1	1	1	1	1	1	1	1
OG0001335	HOG0001380	74	1	1	1	1	1	1	1	1	1	1	1	1	1	1	1	1	1	1	1	1	1	1	1	1	1	1	1	1	1	1	1	1	1	1	1	1	1	1	1	1	1	1	1	1	1	1	1
OG0001336	HOG0001381	74	1	1	1	1	1	1	1	1	1	1	1	1	1	1	1	1	1	1	1	1	1	1	1	1	1	1	1	1	1	1	1	1	1	1	1	1	1	1	1	1	1	1	1	1	1	1	1
OG0001337	HOG0001382	74	1	1	1	1	1	1	1	1	1	1	1	1	1	1	1	1	1	1	1	1	1	1	1	1	1	1	1	1	1	1	1	1	1	1	1	1	1	1	1	1	1	1	1	1	1	1	1
OG0001338	HOG0001383	74	1	1	1	1	1	1	1	1	1	1	1	1	1	1	1	1	1	1	1	1	1	1	1	1	1	1	1	1	1	1	1	1	1	1	1	1	1	1	1	1	1	1	1	1	1	1	1
OG0001339	HOG0001384	74	1	1	1	1	1	1	1	1	1	1	1	1	1	1	1	1	1	1	1	1	1	1	1	1	1	1	1	1	1	1	1	1	1	1	1	1	1	1	1	1	1	1	1	1	1	1	1
OG0001340	HOG0001385	74	1	1	1	1	1	1	1	1	1	1	1	1	1	1	1	1	1	1	1	1	1	1	1	1	1	1	1	1	1	1	1	1	1	1	1	1	1	1	1	1	1	1	1	1	1	1	1
OG0001341	HOG0001386	74	1	1	1	1	1	1	1	1	1	1	1	1	1	1	1	1	1	1	1	1	1	1	1	1	1	1	1	1	1	1	1	1	1	1	1	1	1	1	1	1	1	1	1	1	1	1	1
OG0001342	HOG0001387	74	1	1	1	1	1	1	1	1	1	1	1	1	1	1	1	1	1	1	1	1	1	1	1	1	1	1	1	1	1	1	1	1	1	1	1	1	1	1	1	1	1	1	1	1	1	1	1
OG0001343	HOG0001388	74	1	1	1	1	1	1	1	1	1	1	1	1	1	1	1	1	1	1	1	1	1	1	1	1	1	1	1	1	1	1	1	1	1	1	1	1	1	1	1	1	1	1	1	1	1	1	1
OG0001344	HOG0001389	74	1	1	1	1	1	1	1	1	1	1	1	1	1	1	1	1	1	1	1	1	1	1	1	1	1	1	1	1	1	1	1	1	1	1	1	1	1	1	1	1	1	1	1	1	1	1	1
OG0001345	HOG0001390	74	1	1	1	1	1	1	1	1	1	1	1	1	1	1	1	1	1	1	1	1	1	1	1	1	1	1	1	1	1	1	1	1	1	1	1	1	1	1	1	1	1	1	1	1	1	1	1
OG0001346	HOG0001391	74	1	1	1	1	1	1	1	1	1	1	1	1	1	1	1	1	1	1	1	1	1	1	1	1	1	1	1	1	1	1	1	1	1	1	1	1	1	1	1	1	1	1	1	1	1	1	1
OG0001347	HOG0001392	74	1	1	1	1	1	1	1	1	1	1	1	1	1	1	1	1	1	1	1	1	1	1	1	1	1	1	1	1	1	1	1	1	1	1	1	1	1	1	1	1	1	1	1	1	1	1	1
OG0001348	HOG0001393	74	1	1	1	1	1	1	1	1	1	1	1	1	1	1	1	1	1	1	1	1	1	1	1	1	1	1	1	1	1	1	1	1	1	1	1	1	1	1	1	1	1	1	1	1	1	1	1
OG0001349	HOG0001394	74	1	1	1	1	1	1	1	1	1	1	1	1	1	1	1	1	1	1	1	1	1	1	1	1	1	1	1	1	1	1	1	1	1	1	1	1	1	1	1	1	1	1	1	1	1	1	1
OG0001350	HOG0001395	74	1	1	1	1	1	1	1	1	1	1	1	1	1	1	1	1	1	1	1	1	1	1	1	1	1	1	1	1	1	1	1	1	1	1	1	1	1	1	1	1	1	1	1	1	1	1	1
OG0001351	HOG0001396	74	1	1	1	1	1	1	1	1	1	1	1	1	1	1	1	1	1	1	1	1	1	1	1	1	1	1	1	1	1	1	1	1	1	1	1	1	1	1	1	1	1	1	1	1	1	1	1
OG0001352	HOG0001397	74	1	1	1	1	1	1	1	1	1	1	1	1	1	1	1	1	1	1	1	1	1	1	1	1	1	1	1	1	1	1	1	1	1	1	1	1	1	1	1	1	1	1	1	1	1	1	1
OG0001353	HOG0001398	74	1	1	1	1	1	1	1	1	1	1	1	1	1	1	1	1	1	1	1	1	1	1	1	1	1	1	1	1	1	1	1	1	1	1	1	1	1	1	1	1	1	1	1	1	1	1	1
OG0001354	HOG0001399	74	1	1	1	1	1	1	1	1	1	1	1	1	1	1	1	1	1	1	1	1	1	1	1	1	1	1	1	1	1	1	1	1	1	1	1	1	1	1	1	1	1	1	1	1	1	1	1
OG0001355	HOG0001400	74	1	1	1	1	1	1	1	1	1	1	1	1	1	1	1	1	1	1	1	1	1	1	1	1	1	1	1	1	1	1	1	1	1	1	1	1	1	1	1	1	1	1	1	1	1	1	1
OG0001356	HOG0001401	74	1	1	1	1	1	1	1	1	1	1	1	1	1	1	1	1	1	1	1	1	1	1	1	1	1	1	1	1	1	1	1	1	1	1	1	1	1	1	1	1	1	1	1	1	1	1	1
OG0001357	HOG0001402	74	1	1	1	1	1	1	1	1	1	1	1	1	1	1	1	1	1	1	1	1	1	1	1	1	1	1	1	1	1	1	1	1	1	1	1	1	1	1	1	1	1	1	1	1	1	1	1
OG0001358	HOG0001403	74	1	1	1	1	1	1	1	1	1	1	1	1	1	1	1	1	1	1	1	1	1	1	1	1	1	1	1	1	1	1	1	1	1	1	1	1	1	1	1	1	1	1	1	1	1	1	1
OG0001359	HOG0001404	74	1	1	1	1	1	1	1	1	1	1	1	1	1	1	1	1	1	1	1	1	1	1	1	1	1	1	1	1	1	1	1	1	1	1	1	1	1	1	1	1	1	1	1	1	1	1	1
OG0001360	HOG0001405	74	1	1	1	1	1	1	1	1	1	1	1	1	1	1	1	1	1	1	1	1	1	1	1	1	1	1	1	1	1	1	1	1	1	1	1	1	1	1	1	1	1	1	1	1	1	1	1
OG0001361	HOG0001406	74	1	1	1	1	1	1	1	1	1	1	1	1	1	1	1	1	1	1	1	1	1	1	1	1	1	1	1	1	1	1	1	1	1	1	1	1	1	1	1	1	1	1	1	1	1	1	1
OG0001362	HOG0001407	74	1	1	1	1	1	1	1	1	1	1	1	1	1	1	1	1	1	1	1	1	1	1	1	1	1	1	1	1	1	1	1	1	1	1	1	1	1	1	1	1	1	1	1	1	1	1	1
OG0001363	HOG0001408	74	1	1	1	1	1	1	1	1	1	1	1	1	1	1	1	1	1	1	1	1	1	1	1	1	1	1	1	1	1	1	1	1	1	1	1	1	1	1	1	1	1	1	1	1	1	1	1
OG0001364	HOG0001409	74	1	1	1	1	1	1	1	1	1	1	1	1	1	1	1	1	1	1	1	1	1	1	1	1	1	1	1	1	1	1	1	1	1	1	1	1	1	1	1	1	1	1	1	1	1	1	1
OG0001365	HOG0001410	74	1	1	1	1	1	1	1	1	1	1	1	1	1	1	1	1	1	1	1	1	1	1	1	1	1	1	1	1	1	1	1	1	1	1	1	1	1	1	1	1	1	1	1	1	1	1	1
OG0001366	HOG0001411	74	1	1	1	1	1	1	1	1	1	1	1	1	1	1	1	1	1	1	1	1	1	1	1	1	1	1	1	1	1	1	1	1	1	1	1	1	1	1	1	1	1	1	1	1	1	1	1
OG0001367	HOG0001412	74	1	1	1	1	1	1	1	1	1	1	1	1	1	1	1	1	1	1	1	1	1	1	1	1	1	1	1	1	1	1	1	1	1	1	1	1	1	1	1	1	1	1	1	1	1	1	1
OG0001368	HOG0001413	74	1	1	1	1	1	1	1	1	1	1	1	1	1	1	1	1	1	1	1	1	1	1	1	1	1	1	1	1	1	1	1	1	1	1	1	1	1	1	1	1	1	1	1	1	1	1	1
OG0001369	HOG0001414	74	1	1	1	1	1	1	1	1	1	1	1	1	1	1	1	1	1	1	1	1	1	1	1	1	1	1	1	1	1	1	1	1	1	1	1	1	1	1	1	1	1	1	1	1	1	1	1
OG0001370	HOG0001415	74	1	1	1	1	1	1	1	1	1	1	1	1	1	1	1	1	1	1	1	1	1	1	1	1	1	1	1	1	1	1	1	1	1	1	1	1	1	1	1	1	1	1	1	1	1	1	1
OG0001371	HOG0001416	74	1	1	1	1	1	1	1	1	1	1	1	1	1	1	1	1	1	1	1	1	1	1	1	1	1	1	1	1	1	1	1	1	1	1	1	1	1	1	1	1	1	1	1	1	1	1	1
OG0001372	HOG0001417	74	1	1	1	1	1	1	1	1	1	1	1	1	1	1	1	1	1	1	1	1	1	1	1	1	1	1	1	1	1	1	1	1	1	1	1	1	1	1	1	1	1	1	1	1	1	1	1
OG0001373	HOG0001418	74	1	1	1	1	1	1	1	1	1	1	1	1	1	1	1	1	1	1	1	1	1	1	1	1	1	1	1	1	1	1	1	1	1	1	1	1	1	1	1	1	1	1	1	1	1	1	1
OG0001374	HOG0001419	74	1	1	1	1	1	1	1	1	1	1	1	1	1	1	1	1	1	1	1	1	1	1	1	1	1	1	1	1	1	1	1	1	1	1	1	1	1	1	1	1	1	1	1	1	1	1	1
OG0001375	HOG0001420	74	1	1	1	1	1	1	1	1	1	1	1	1	1	1	1	1	1	1	1	1	1	1	1	1	1	1	1	1	1	1	1	1	1	1	1	1	1	1	1	1	1	1	1	1	1	1	1
OG0001376	HOG0001421	74	1	1	1	1	1	1	1	1	1	1	1	1	1	1	1	1	1	1	1	1	1	1	1	1	1	1	1	1	1	1	1	1	1	1	1	1	1	1	1	1	1	1	1	1	1	1	1
OG0001377	HOG0001422	74	1	1	1	1	1	1	1	1	1	1	1	1	1	1	1	1	1	1	1	1	1	1	1	1	1	1	1	1	1	1	1	1	1	1	1	1	1	1	1	1	1	1	1	1	1	1	1
OG0001378	HOG0001423	74	1	1	1	1	1	1	1	1	1	1	1	1	1	1	1	1	1	1	1	1	1	1	1	1	1	1	1	1	1	1	1	1	1	1	1	1	1	1	1	1	1	1	1	1	1	1	1
OG0001379	HOG0001424	74	1	1	1	1	1	1	1	1	1	1	1	1	1	1	1	1	1	1	1	1	1	1	1	1	1	1	1	1	1	1	1	1	1	1	1	1	1	1	1	1	1	1	1	1	1	1	1
OG0001380	HOG0001425	74	1	1	1	1	1	1	1	1	1	1	1	1	1	1	1	1	1	1	1	1	1	1	1	1	1	1	1	1	1	1	1	1	1	1	1	1	1	1	1	1	1	1	1	1	1	1	1
OG0001381	HOG0001426	74	1	1	1	1	1	1	1	1	1	1	1	1	1	1	1	1	1	1	1	1	1	1	1	1	1	1	1	1	1	1	1	1	1	1	1	1	1	1	1	1	1	1	1	1	1	1	1
OG0001382	HOG0001427	74	1	1	1	1	1	1	1	1	1	1	1	1	1	1	1	1	1	1	1	1	1	1	1	1	1	1	1	1	1	1	1	1	1	1	1	1	1	1	1	1	1	1	1	1	1	1	1
OG0001383	HOG0001428	74	1	1	1	1	1	1	1	1	1	1	1	1	1	1	1	1	1	1	1	1	1	1	1	1	1	1	1	1	1	1	1	1	1	1	1	1	1	1	1	1	1	1	1	1	1	1	1
OG0001384	HOG0001429	74	1	1	1	1	1	1	1	1	1	1	1	1	1	1	1	1	1	1	1	1	1	1	1	1	1	1	1	1	1	1	1	1	1	1	1	1	1	1	1	1	1	1	1	1	1	1	1
OG0001385	HOG0001430	74	1	1	1	1	1	1	1	1	1	1	1	1	1	1	1	1	1	1	1	1	1	1	1	1	1	1	1	1	1	1	1	1	1	1	1	1	1	1	1	1	1	1	1	1	1	1	1
OG0001386	HOG0001431	74	1	1	1	1	1	1	1	1	1	1	1	1	1	1	1	1	1	1	1	1	1	1	1	1	1	1	1	1	1	1	1	1	1	1	1	1	1	1	1	1	1	1	1	1	1	1	1
OG0001387	HOG0001432	74	1	1	1	1	1	1	1	1	1	1	1	1	1	1	1	1	1	1	1	1	1	1	1	1	1	1	1	1	1	1	1	1	1	1	1	1	1	1	1	1	1	1	1	1	1	1	1
OG0001388	HOG0001433	74	1	1	1	1	1	1	1	1	1	1	1	1	1	1	1	1	1	1	1	1	1	1	1	1	1	1	1	1	1	1	1	1	1	1	1	1	1	1	1	1	1	1	1	1	1	1	1
OG0001389	HOG0001434	74	1	1	1	1	1	1	1	1	1	1	1	1	1	1	1	1	1	1	1	1	1	1	1	1	1	1	1	1	1	1	1	1	1	1	1	1	1	1	1	1	1	1	1	1	1	1	1
OG0001390	HOG0001435	74	1	1	1	1	1	1	1	1	1	1	1	1	1	1	1	1	1	1	1	1	1	1	1	1	1	1	1	1	1	1	1	1	1	1	1	1	1	1	1	1	1	1	1	1	1	1	1
OG0001391	HOG0001436	74	1	1	1	1	1	1	1	1	1	1	1	1	1	1	1	1	1	1	1	1	1	1	1	1	1	1	1	1	1	1	1	1	1	1	1	1	1	1	1	1	1	1	1	1	1	1	1
OG0001392	HOG0001437	74	1	1	1	1	1	1	1	1	1	1	1	1	1	1	1	1	1	1	1	1	1	1	1	1	1	1	1	1	1	1	1	1	1	1	1	1	1	1	1	1	1	1	1	1	1	1	1
OG0001393	HOG0001438	74	1	1	1	1	1	1	1	1	1	1	1	1	1	1	1	1	1	1	1	1	1	1	1	1	1	1	1	1	1	1	1	1	1	1	1	1	1	1	1	1	1	1	1	1	1	1	1
OG0001394	HOG0001439	74	1	1	1	1	1	1	1	1	1	1	1	1	1	1	1	1	1	1	1	1	1	1	1	1	1	1	1	1	1	1	1	1	1	1	1	1	1	1	1	1	1	1	1	1	1	1	1
OG0001395	HOG0001440	72	1	2	1	1	1	1	1	1	1	1	1	1	1	1	1	1	1	1	1	1	1	1	1	1	1	1	1	1	1	1	1	1	1	1	1	1	0	1	1	1	1	1	1	0	1	1	1
OG0001396	HOG0001441	74	1	1	1	1	1	1	1	1	1	1	1	1	1	1	1	1	1	1	1	1	1	1	1	1	1	1	1	1	1	1	1	1	1	1	1	1	1	1	1	1	1	1	1	1	1	1	1
OG0001397	HOG0001442	74	1	1	1	1	1	1	1	1	1	1	1	1	1	1	1	1	1	1	1	1	1	1	1	1	1	1	1	1	1	1	1	1	1	1	1	1	1	1	1	1	1	1	1	1	1	1	1
OG0001398	HOG0001443	74	1	1	1	1	1	1	1	1	1	1	1	1	1	1	1	1	1	1	1	1	1	1	1	1	1	1	1	1	1	1	1	1	1	1	1	1	1	1	1	1	1	1	1	1	1	1	1
OG0001399	HOG0001444	74	1	1	1	1	1	1	1	1	1	1	1	1	1	1	1	1	1	1	1	1	1	1	1	1	1	1	1	1	1	1	1	1	1	1	1	1	1	1	1	1	1	1	1	1	1	1	1
OG0001400	HOG0001445	74	1	1	1	1	1	1	1	1	1	1	1	1	1	1	1	1	1	1	1	1	1	1	1	1	1	1	1	1	1	1	1	1	1	1	1	1	1	1	1	1	1	1	1	1	1	1	1
OG0001401	HOG0001446	74	1	1	1	1	1	1	1	1	1	1	1	1	1	1	1	1	1	1	1	1	1	1	1	1	1	1	1	1	1	1	1	1	1	1	1	1	1	1	1	1	1	1	1	1	1	1	1
OG0001402	HOG0001447	74	1	1	1	1	1	1	1	1	1	1	1	1	1	1	1	1	1	1	1	1	1	1	1	1	1	1	1	1	1	1	1	1	1	1	1	1	1	1	1	1	1	1	1	1	1	1	1
OG0001403	HOG0001448	74	1	1	1	1	1	1	1	1	1	1	1	1	1	1	1	1	1	1	1	1	1	1	1	1	1	1	1	1	1	1	1	1	1	1	1	1	1	1	1	1	1	1	1	1	1	1	1
OG0001404	HOG0001449	74	1	1	1	1	1	1	1	1	1	1	1	1	1	1	1	1	1	1	1	1	1	1	1	1	1	1	1	1	1	1	1	1	1	1	1	1	1	1	1	1	1	1	1	1	1	1	1
OG0001405	HOG0001450	74	1	1	1	1	1	1	1	1	1	1	1	1	1	1	1	1	1	1	1	1	1	1	1	1	1	1	1	1	1	1	1	1	1	1	1	1	1	1	1	1	1	1	1	1	1	1	1
OG0001406	HOG0001451	74	1	1	1	1	1	1	1	1	1	1	1	1	1	1	1	1	1	1	1	1	1	1	1	1	1	1	1	1	1	1	1	1	1	1	1	1	1	1	1	1	1	1	1	1	1	1	1
OG0001407	HOG0001452	74	1	1	1	1	1	1	1	1	1	1	1	1	1	1	1	1	1	1	1	1	1	1	1	1	1	1	1	1	1	1	1	1	1	1	1	1	1	1	1	1	1	1	1	1	1	1	1
OG0001408	HOG0001453	74	1	1	1	1	1	1	1	1	1	1	1	1	1	1	1	1	1	1	1	1	1	1	1	1	1	1	1	1	1	1	1	1	1	1	1	1	1	1	1	1	1	1	1	1	1	1	1
OG0001409	HOG0001454	74	1	1	1	1	1	1	1	1	1	1	1	1	1	1	1	1	1	1	1	1	1	1	1	1	1	1	1	1	1	1	1	1	1	1	1	1	1	1	1	1	1	1	1	1	1	1	1
OG0001410	HOG0001455	74	1	1	1	1	1	1	1	1	1	1	1	1	1	1	1	1	1	1	1	1	1	1	1	1	1	1	1	1	1	1	1	1	1	1	1	1	1	1	1	1	1	1	1	1	1	1	1
OG0001411	HOG0001456	74	1	1	1	1	1	1	1	1	1	1	1	1	1	1	1	1	1	1	1	1	1	1	1	1	1	1	1	1	1	1	1	1	1	1	1	1	1	1	1	1	1	1	1	1	1	1	1
OG0001412	HOG0001457	74	1	1	1	1	1	1	1	1	1	1	1	1	1	1	1	1	1	1	1	1	1	1	1	1	1	1	1	1	1	1	1	1	1	1	1	1	1	1	1	1	1	1	1	1	1	1	1
OG0001413	HOG0001458	74	1	1	1	1	1	1	1	1	1	1	1	1	1	1	1	1	1	1	1	1	1	1	1	1	1	1	1	1	1	1	1	1	1	1	1	1	1	1	1	1	1	1	1	1	1	1	1
OG0001414	HOG0001459	74	1	1	1	1	1	1	1	1	1	1	1	1	1	1	1	1	1	1	1	1	1	1	1	1	1	1	1	1	1	1	1	1	1	1	1	1	1	1	1	1	1	1	1	1	1	1	1
OG0001415	HOG0001460	74	1	1	1	1	1	1	1	1	1	1	1	1	1	1	1	1	1	1	1	1	1	1	1	1	1	1	1	1	1	1	1	1	1	1	1	1	1	1	1	1	1	1	1	1	1	1	1
OG0001416	HOG0001461	74	1	1	1	1	1	1	1	1	1	1	1	1	1	1	1	1	1	1	1	1	1	1	1	1	1	1	1	1	1	1	1	1	1	1	1	1	1	1	1	1	1	1	1	1	1	1	1
OG0001417	HOG0001462	74	1	1	1	1	1	1	1	1	1	1	1	1	1	1	1	1	1	1	1	1	1	1	1	1	1	1	1	1	1	1	1	1	1	1	1	1	1	1	1	1	1	1	1	1	1	1	1
OG0001418	HOG0001463	74	1	1	1	1	1	1	1	1	1	1	1	1	1	1	1	1	1	1	1	1	1	1	1	1	1	1	1	1	1	1	1	1	1	1	1	1	1	1	1	1	1	1	1	1	1	1	1
OG0001419	HOG0001464	74	1	1	1	1	1	1	1	1	1	1	1	1	1	1	1	1	1	1	1	1	1	1	1	1	1	1	1	1	1	1	1	1	1	1	1	1	1	1	1	1	1	1	1	1	1	1	1
OG0001420	HOG0001465	74	1	1	1	1	1	1	1	1	1	1	1	1	1	1	1	1	1	1	1	1	1	1	1	1	1	1	1	1	1	1	1	1	1	1	1	1	1	1	1	1	1	1	1	1	1	1	1
OG0001421	HOG0001466	74	1	1	1	1	1	1	1	1	1	1	1	1	1	1	1	1	1	1	1	1	1	1	1	1	1	1	1	1	1	1	1	1	1	1	1	1	1	1	1	1	1	1	1	1	1	1	1
OG0001422	HOG0001467	74	1	1	1	1	1	1	1	1	1	1	1	1	1	1	1	1	1	1	1	1	1	1	1	1	1	1	1	1	1	1	1	1	1	1	1	1	1	1	1	1	1	1	1	1	1	1	1
OG0001423	HOG0001468	74	1	1	1	1	1	1	1	1	1	1	1	1	1	1	1	1	1	1	1	1	1	1	1	1	1	1	1	1	1	1	1	1	1	1	1	1	1	1	1	1	1	1	1	1	1	1	1
OG0001424	HOG0001469	74	1	1	1	1	1	1	1	1	1	1	1	1	1	1	1	1	1	1	1	1	1	1	1	1	1	1	1	1	1	1	1	1	1	1	1	1	1	1	1	1	1	1	1	1	1	1	1
OG0001425	HOG0001470	74	1	1	1	1	1	1	1	1	1	1	1	1	1	1	1	1	1	1	1	1	1	1	1	1	1	1	1	1	1	1	1	1	1	1	1	1	1	1	1	1	1	1	1	1	1	1	1
OG0001426	HOG0001471	74	1	1	1	1	1	1	1	1	1	1	1	1	1	1	1	1	1	1	1	1	1	1	1	1	1	1	1	1	1	1	1	1	1	1	1	1	1	1	1	1	1	1	1	1	1	1	1
OG0001427	HOG0001472	74	1	1	1	1	1	1	1	1	1	1	1	1	1	1	1	1	1	1	1	1	1	1	1	1	1	1	1	1	1	1	1	1	1	1	1	1	1	1	1	1	1	1	1	1	1	1	1
OG0001428	HOG0001473	74	1	1	1	1	1	1	1	1	1	1	1	1	1	1	1	1	1	1	1	1	1	1	1	1	1	1	1	1	1	1	1	1	1	1	1	1	1	1	1	1	1	1	1	1	1	1	1
OG0001429	HOG0001474	74	1	1	1	1	1	1	1	1	1	1	1	1	1	1	1	1	1	1	1	1	1	1	1	1	1	1	1	1	1	1	1	1	1	1	1	1	1	1	1	1	1	1	1	1	1	1	1
OG0001430	HOG0001475	74	1	1	1	1	1	1	1	1	1	1	1	1	1	1	1	1	1	1	1	1	1	1	1	1	1	1	1	1	1	1	1	1	1	1	1	1	1	1	1	1	1	1	1	1	1	1	1
OG0001431	HOG0001476	74	1	1	1	1	1	1	1	1	1	1	1	1	1	1	1	1	1	1	1	1	1	1	1	1	1	1	1	1	1	1	1	1	1	1	1	1	1	1	1	1	1	1	1	1	1	1	1
OG0001432	HOG0001477	74	1	1	1	1	1	1	1	1	1	1	1	1	1	1	1	1	1	1	1	1	1	1	1	1	1	1	1	1	1	1	1	1	1	1	1	1	1	1	1	1	1	1	1	1	1	1	1
OG0001433	HOG0001478	74	1	1	1	1	1	1	1	1	1	1	1	1	1	1	1	1	1	1	1	1	1	1	1	1	1	1	1	1	1	1	1	1	1	1	1	1	1	1	1	1	1	1	1	1	1	1	1
OG0001434	HOG0001479	74	1	1	1	1	1	1	1	1	1	1	1	1	1	1	1	1	1	1	1	1	1	1	1	1	1	1	1	1	1	1	1	1	1	1	1	1	1	1	1	1	1	1	1	1	1	1	1
OG0001435	HOG0001480	74	1	1	1	1	1	1	1	1	1	1	1	1	1	1	1	1	1	1	1	1	1	1	1	1	1	1	1	1	1	1	1	1	1	1	1	1	1	1	1	1	1	1	1	1	1	1	1
OG0001436	HOG0001481	74	1	1	1	1	1	1	1	1	1	1	1	1	1	1	1	1	1	1	1	1	1	1	1	1	1	1	1	1	1	1	1	1	1	1	1	1	1	1	1	1	1	1	1	1	1	1	1
OG0001437	HOG0001482	74	1	1	1	1	1	1	1	1	1	1	1	1	1	1	1	1	1	1	1	1	1	1	1	1	1	1	1	1	1	1	1	1	1	1	1	1	1	1	1	1	1	1	1	1	1	1	1
OG0001438	HOG0001483	74	1	1	1	1	1	1	1	1	1	1	1	1	1	1	1	1	1	1	1	1	1	1	1	1	1	1	1	1	1	1	1	1	1	1	1	1	1	1	1	1	1	1	1	1	1	1	1
OG0001439	HOG0001484	74	1	1	1	1	1	1	1	1	1	1	1	1	1	1	1	1	1	1	1	1	1	1	1	1	1	1	1	1	1	1	1	1	1	1	1	1	1	1	1	1	1	1	1	1	1	1	1
OG0001440	HOG0001485	74	1	1	1	1	1	1	1	1	1	1	1	1	1	1	1	1	1	1	1	1	1	1	1	1	1	1	1	1	1	1	1	1	1	1	1	1	1	1	1	1	1	1	1	1	1	1	1
OG0001441	HOG0001486	74	1	1	1	1	1	1	1	1	1	1	1	1	1	1	1	1	1	1	1	1	1	1	1	1	1	1	1	1	1	1	1	1	1	1	1	1	1	1	1	1	1	1	1	1	1	1	1
OG0001442	HOG0001487	74	1	1	1	1	1	1	1	1	1	1	1	1	1	1	1	1	1	1	1	1	1	1	1	1	1	1	1	1	1	1	1	1	1	1	1	1	1	1	1	1	1	1	1	1	1	1	1
OG0001443	HOG0001488	74	1	1	1	1	1	1	1	1	1	1	1	1	1	1	1	1	1	1	1	1	1	1	1	1	1	1	1	1	1	1	1	1	1	1	1	1	1	1	1	1	1	1	1	1	1	1	1
OG0001444	HOG0001489	74	1	1	1	1	1	1	1	1	1	1	1	1	1	1	1	1	1	1	1	1	1	1	1	1	1	1	1	1	1	1	1	1	1	1	1	1	1	1	1	1	1	1	1	1	1	1	1
OG0001445	HOG0001490	74	1	1	1	1	1	1	1	1	1	1	1	1	1	1	1	1	1	1	1	1	1	1	1	1	1	1	1	1	1	1	1	1	1	1	1	1	1	1	1	1	1	1	1	1	1	1	1
OG0001446	HOG0001491	74	1	1	1	1	1	1	1	1	1	1	1	1	1	1	1	1	1	1	1	1	1	1	1	1	1	1	1	1	1	1	1	1	1	1	1	1	1	1	1	1	1	1	1	1	1	1	1
OG0001447	HOG0001492	74	1	1	1	1	1	1	1	1	1	1	1	1	1	1	1	1	1	1	1	1	1	1	1	1	1	1	1	1	1	1	1	1	1	1	1	1	1	1	1	1	1	1	1	1	1	1	1
OG0001448	HOG0001493	74	1	1	1	1	1	1	1	1	1	1	1	1	1	1	1	1	1	1	1	1	1	1	1	1	1	1	1	1	1	1	1	1	1	1	1	1	1	1	1	1	1	1	1	1	1	1	1
OG0001449	HOG0001494	74	1	1	1	1	1	1	1	1	1	1	1	1	1	1	1	1	1	1	1	1	1	1	1	1	1	1	1	1	1	1	1	1	1	1	1	1	1	1	1	1	1	1	1	1	1	1	1
OG0001450	HOG0001495	74	1	1	1	1	1	1	1	1	1	1	1	1	1	1	1	1	1	1	1	1	1	1	1	1	1	1	1	1	1	1	1	1	1	1	1	1	1	1	1	1	1	1	1	1	1	1	1
OG0001451	HOG0001496	74	1	1	1	1	1	1	1	1	1	1	1	1	1	1	1	1	1	1	1	1	1	1	1	1	1	1	1	1	1	1	1	1	1	1	1	1	1	1	1	1	1	1	1	1	1	1	1
OG0001452	HOG0001497	74	1	1	1	1	1	1	1	1	1	1	1	1	1	1	1	1	1	1	1	1	1	1	1	1	1	1	1	1	1	1	1	1	1	1	1	1	1	1	1	1	1	1	1	1	1	1	1
OG0001453	HOG0001498	74	1	1	1	1	1	1	1	1	1	1	1	1	1	1	1	1	1	1	1	1	1	1	1	1	1	1	1	1	1	1	1	1	1	1	1	1	1	1	1	1	1	1	1	1	1	1	1
OG0001454	HOG0001499	74	1	1	1	1	1	1	1	1	1	1	1	1	1	1	1	1	1	1	1	1	1	1	1	1	1	1	1	1	1	1	1	1	1	1	1	1	1	1	1	1	1	1	1	1	1	1	1
OG0001455	HOG0001500	74	1	1	1	1	1	1	1	1	1	1	1	1	1	1	1	1	1	1	1	1	1	1	1	1	1	1	1	1	1	1	1	1	1	1	1	1	1	1	1	1	1	1	1	1	1	1	1
OG0001456	HOG0001501	74	1	1	1	1	1	1	1	1	1	1	1	1	1	1	1	1	1	1	1	1	1	1	1	1	1	1	1	1	1	1	1	1	1	1	1	1	1	1	1	1	1	1	1	1	1	1	1
OG0001457	HOG0001502	74	1	1	1	1	1	1	1	1	1	1	1	1	1	1	1	1	1	1	1	1	1	1	1	1	1	1	1	1	1	1	1	1	1	1	1	1	1	1	1	1	1	1	1	1	1	1	1
OG0001458	HOG0001503	74	1	1	1	1	1	1	1	1	1	1	1	1	1	1	1	1	1	1	1	1	1	1	1	1	1	1	1	1	1	1	1	1	1	1	1	1	1	1	1	1	1	1	1	1	1	1	1
OG0001459	HOG0001504	74	1	1	1	1	1	1	1	1	1	1	1	1	1	1	1	1	1	1	1	1	1	1	1	1	1	1	1	1	1	1	1	1	1	1	1	1	1	1	1	1	1	1	1	1	1	1	1
OG0001460	HOG0001505	74	1	1	1	1	1	1	1	1	1	1	1	1	1	1	1	1	1	1	1	1	1	1	1	1	1	1	1	1	1	1	1	1	1	1	1	1	1	1	1	1	1	1	1	1	1	1	1
OG0001461	HOG0001506	74	1	1	1	1	1	1	1	1	1	1	1	1	1	1	1	1	1	1	1	1	1	1	1	1	1	1	1	1	1	1	1	1	1	1	1	1	1	1	1	1	1	1	1	1	1	1	1
OG0001462	HOG0001507	74	1	1	1	1	1	1	1	1	1	1	1	1	1	1	1	1	1	1	1	1	1	1	1	1	1	1	1	1	1	1	1	1	1	1	1	1	1	1	1	1	1	1	1	1	1	1	1
OG0001463	HOG0001508	74	1	1	1	1	1	1	1	1	1	1	1	1	1	1	1	1	1	1	1	1	1	1	1	1	1	1	1	1	1	1	1	1	1	1	1	1	1	1	1	1	1	1	1	1	1	1	1
OG0001464	HOG0001509	74	1	1	1	1	1	1	1	1	1	1	1	1	1	1	1	1	1	1	1	1	1	1	1	1	1	1	1	1	1	1	1	1	1	1	1	1	1	1	1	1	1	1	1	1	1	1	1
OG0001465	HOG0001510	74	1	1	1	1	1	1	1	1	1	1	1	1	1	1	1	1	1	1	1	1	1	1	1	1	1	1	1	1	1	1	1	1	1	1	1	1	1	1	1	1	1	1	1	1	1	1	1
OG0001466	HOG0001511	74	1	1	1	1	1	1	1	1	1	1	1	1	1	1	1	1	1	1	1	1	1	1	1	1	1	1	1	1	1	1	1	1	1	1	1	1	1	1	1	1	1	1	1	1	1	1	1
OG0001467	HOG0001512	74	1	1	1	1	1	1	1	1	1	1	1	1	1	1	1	1	1	1	1	1	1	1	1	1	1	1	1	1	1	1	1	1	1	1	1	1	1	1	1	1	1	1	1	1	1	1	1
OG0001468	HOG0001513	74	1	1	1	1	1	1	1	1	1	1	1	1	1	1	1	1	1	1	1	1	1	1	1	1	1	1	1	1	1	1	1	1	1	1	1	1	1	1	1	1	1	1	1	1	1	1	1
OG0001469	HOG0001514	74	1	1	1	1	1	1	1	1	1	1	1	1	1	1	1	1	1	1	1	1	1	1	1	1	1	1	1	1	1	1	1	1	1	1	1	1	1	1	1	1	1	1	1	1	1	1	1
OG0001470	HOG0001515	74	1	1	1	1	1	1	1	1	1	1	1	1	1	1	1	1	1	1	1	1	1	1	1	1	1	1	1	1	1	1	1	1	1	1	1	1	1	1	1	1	1	1	1	1	1	1	1
OG0001471	HOG0001516	74	1	1	1	1	1	1	1	1	1	1	1	1	1	1	1	1	1	1	1	1	1	1	1	1	1	1	1	1	1	1	1	1	1	1	1	1	1	1	1	1	1	1	1	1	1	1	1
OG0001472	HOG0001517	74	1	1	1	1	1	1	1	1	1	1	1	1	1	1	1	1	1	1	1	1	1	1	1	1	1	1	1	1	1	1	1	1	1	1	1	1	1	1	1	1	1	1	1	1	1	1	1
OG0001473	HOG0001518	74	1	1	1	1	1	1	1	1	1	1	1	1	1	1	1	1	1	1	1	1	1	1	1	1	1	1	1	1	1	1	1	1	1	1	1	1	1	1	1	1	1	1	1	1	1	1	1
OG0001474	HOG0001519	74	1	1	1	1	1	1	1	1	1	1	1	1	1	1	1	1	1	1	1	1	1	1	1	1	1	1	1	1	1	1	1	1	1	1	1	1	1	1	1	1	1	1	1	1	1	1	1
OG0001475	HOG0001520	74	1	1	1	1	1	1	1	1	1	1	1	1	1	1	1	1	1	1	1	1	1	1	1	1	1	1	1	1	1	1	1	1	1	1	1	1	1	1	1	1	1	1	1	1	1	1	1
OG0001476	HOG0001521	74	1	1	1	1	1	1	1	1	1	1	1	1	1	1	1	1	1	1	1	1	1	1	1	1	1	1	1	1	1	1	1	1	1	1	1	1	1	1	1	1	1	1	1	1	1	1	1
OG0001477	HOG0001522	74	1	1	1	1	1	1	1	1	1	1	1	1	1	1	1	1	1	1	1	1	1	1	1	1	1	1	1	1	1	1	1	1	1	1	1	1	1	1	1	1	1	1	1	1	1	1	1
OG0001478	HOG0001523	74	1	1	1	1	1	1	1	1	1	1	1	1	1	1	1	1	1	1	1	1	1	1	1	1	1	1	1	1	1	1	1	1	1	1	1	1	1	1	1	1	1	1	1	1	1	1	1
OG0001479	HOG0001524	74	1	1	1	1	1	1	1	1	1	1	1	1	1	1	1	1	1	1	1	1	1	1	1	1	1	1	1	1	1	1	1	1	1	1	1	1	1	1	1	1	1	1	1	1	1	1	1
OG0001480	HOG0001525	74	1	1	1	1	1	1	1	1	1	1	1	1	1	1	1	1	1	1	1	1	1	1	1	1	1	1	1	1	1	1	1	1	1	1	1	1	1	1	1	1	1	1	1	1	1	1	1
OG0001481	HOG0001526	74	1	1	1	1	1	1	1	1	1	1	1	1	1	1	1	1	1	1	1	1	1	1	1	1	1	1	1	1	1	1	1	1	1	1	1	1	1	1	1	1	1	1	1	1	1	1	1
OG0001482	HOG0001527	74	1	1	1	1	1	1	1	1	1	1	1	1	1	1	1	1	1	1	1	1	1	1	1	1	1	1	1	1	1	1	1	1	1	1	1	1	1	1	1	1	1	1	1	1	1	1	1
OG0001483	HOG0001528	74	1	1	1	1	1	1	1	1	1	1	1	1	1	1	1	1	1	1	1	1	1	1	1	1	1	1	1	1	1	1	1	1	1	1	1	1	1	1	1	1	1	1	1	1	1	1	1
OG0001484	HOG0001529	74	1	1	1	1	1	1	1	1	1	1	1	1	1	1	1	1	1	1	1	1	1	1	1	1	1	1	1	1	1	1	1	1	1	1	1	1	1	1	1	1	1	1	1	1	1	1	1
OG0001485	HOG0001530	74	1	1	1	1	1	1	1	1	1	1	1	1	1	1	1	1	1	1	1	1	1	1	1	1	1	1	1	1	1	1	1	1	1	1	1	1	1	1	1	1	1	1	1	1	1	1	1
OG0001486	HOG0001531	74	1	1	1	1	1	1	1	1	1	1	1	1	1	1	1	1	1	1	1	1	1	1	1	1	1	1	1	1	1	1	1	1	1	1	1	1	1	1	1	1	1	1	1	1	1	1	1
OG0001487	HOG0001532	74	1	1	1	1	1	1	1	1	1	1	1	1	1	1	1	1	1	1	1	1	1	1	1	1	1	1	1	1	1	1	1	1	1	1	1	1	1	1	1	1	1	1	1	1	1	1	1
OG0001488	HOG0001533	74	1	1	1	1	1	1	1	1	1	1	1	1	1	1	1	1	1	1	1	1	1	1	1	1	1	1	1	1	1	1	1	1	1	1	1	1	1	1	1	1	1	1	1	1	1	1	1
OG0001489	HOG0001534	74	1	1	1	1	1	1	1	1	1	1	1	1	1	1	1	1	1	1	1	1	1	1	1	1	1	1	1	1	1	1	1	1	1	1	1	1	1	1	1	1	1	1	1	1	1	1	1
OG0001490	HOG0001535	74	1	1	1	1	1	1	1	1	1	1	1	1	1	1	1	1	1	1	1	1	1	1	1	1	1	1	1	1	1	1	1	1	1	1	1	1	1	1	1	1	1	1	1	1	1	1	1
OG0001491	HOG0001536	74	1	1	1	1	1	1	1	1	1	1	1	1	1	1	1	1	1	1	1	1	1	1	1	1	1	1	1	1	1	1	1	1	1	1	1	1	1	1	1	1	1	1	1	1	1	1	1
OG0001492	HOG0001537	74	1	1	1	1	1	1	1	1	1	1	1	1	1	1	1	1	1	1	1	1	1	1	1	1	1	1	1	1	1	1	1	1	1	1	1	1	1	1	1	1	1	1	1	1	1	1	1
OG0001493	HOG0001538	74	1	1	1	1	1	1	1	1	1	1	1	1	1	1	1	1	1	1	1	1	1	1	1	1	1	1	1	1	1	1	1	1	1	1	1	1	1	1	1	1	1	1	1	1	1	1	1
OG0001494	HOG0001539	74	1	1	1	1	1	1	1	1	1	1	1	1	1	1	1	1	1	1	1	1	1	1	1	1	1	1	1	1	1	1	1	1	1	1	1	1	1	1	1	1	1	1	1	1	1	1	1
OG0001495	HOG0001540	74	1	1	1	1	1	1	1	1	1	1	1	1	1	1	1	1	1	1	1	1	1	1	1	1	1	1	1	1	1	1	1	1	1	1	1	1	1	1	1	1	1	1	1	1	1	1	1
OG0001496	HOG0001541	74	1	1	1	1	1	1	1	1	1	1	1	1	1	1	1	1	1	1	1	1	1	1	1	1	1	1	1	1	1	1	1	1	1	1	1	1	1	1	1	1	1	1	1	1	1	1	1
OG0001497	HOG0001542	74	1	1	1	1	1	1	1	1	1	1	1	1	1	1	1	1	1	1	1	1	1	1	1	1	1	1	1	1	1	1	1	1	1	1	1	1	1	1	1	1	1	1	1	1	1	1	1
OG0001498	HOG0001543	74	1	1	1	1	1	1	1	1	1	1	1	1	1	1	1	1	1	1	1	1	1	1	1	1	1	1	1	1	1	1	1	1	1	1	1	1	1	1	1	1	1	1	1	1	1	1	1
OG0001499	HOG0001544	74	1	1	1	1	1	1	1	1	1	1	1	1	1	1	1	1	1	1	1	1	1	1	1	1	1	1	1	1	1	1	1	1	1	1	1	1	1	1	1	1	1	1	1	1	1	1	1
OG0001500	HOG0001545	74	1	1	1	1	1	1	1	1	1	1	1	1	1	1	1	1	1	1	1	1	1	1	1	1	1	1	1	1	1	1	1	1	1	1	1	1	1	1	1	1	1	1	1	1	1	1	1
OG0001501	HOG0001546	74	1	1	1	1	1	1	1	1	1	1	1	1	1	1	1	1	1	1	1	1	1	1	1	1	1	1	1	1	1	1	1	1	1	1	1	1	1	1	1	1	1	1	1	1	1	1	1
OG0001502	HOG0001547	74	1	1	1	1	1	1	1	1	1	1	1	1	1	1	1	1	1	1	1	1	1	1	1	1	1	1	1	1	1	1	1	1	1	1	1	1	1	1	1	1	1	1	1	1	1	1	1
OG0001503	HOG0001548	74	1	1	1	1	1	1	1	1	1	1	1	1	1	1	1	1	1	1	1	1	1	1	1	1	1	1	1	1	1	1	1	1	1	1	1	1	1	1	1	1	1	1	1	1	1	1	1
OG0001504	HOG0001549	74	1	1	1	1	1	1	1	1	1	1	1	1	1	1	1	1	1	1	1	1	1	1	1	1	1	1	1	1	1	1	1	1	1	1	1	1	1	1	1	1	1	1	1	1	1	1	1
OG0001505	HOG0001550	74	1	1	1	1	1	1	1	1	1	1	1	1	1	1	1	1	1	1	1	1	1	1	1	1	1	1	1	1	1	1	1	1	1	1	1	1	1	1	1	1	1	1	1	1	1	1	1
OG0001506	HOG0001551	74	1	1	1	1	1	1	1	1	1	1	1	1	1	1	1	1	1	1	1	1	1	1	1	1	1	1	1	1	1	1	1	1	1	1	1	1	1	1	1	1	1	1	1	1	1	1	1
OG0001507	HOG0001552	74	1	1	1	1	1	1	1	1	1	1	1	1	1	1	1	1	1	1	1	1	1	1	1	1	1	1	1	1	1	1	1	1	1	1	1	1	1	1	1	1	1	1	1	1	1	1	1
OG0001508	HOG0001553	74	1	1	1	1	1	1	1	1	1	1	1	1	1	1	1	1	1	1	1	1	1	1	1	1	1	1	1	1	1	1	1	1	1	1	1	1	1	1	1	1	1	1	1	1	1	1	1
OG0001509	HOG0001554	74	1	1	1	1	1	1	1	1	1	1	1	1	1	1	1	1	1	1	1	1	1	1	1	1	1	1	1	1	1	1	1	1	1	1	1	1	1	1	1	1	1	1	1	1	1	1	1
OG0001510	HOG0001555	74	1	1	1	1	1	1	1	1	1	1	1	1	1	1	1	1	1	1	1	1	1	1	1	1	1	1	1	1	1	1	1	1	1	1	1	1	1	1	1	1	1	1	1	1	1	1	1
OG0001511	HOG0001556	74	1	1	1	1	1	1	1	1	1	1	1	1	1	1	1	1	1	1	1	1	1	1	1	1	1	1	1	1	1	1	1	1	1	1	1	1	1	1	1	1	1	1	1	1	1	1	1
OG0001512	HOG0001557	74	1	1	1	1	1	1	1	1	1	1	1	1	1	1	1	1	1	1	1	1	1	1	1	1	1	1	1	1	1	1	1	1	1	1	1	1	1	1	1	1	1	1	1	1	1	1	1
OG0001513	HOG0001558	74	1	1	1	1	1	1	1	1	1	1	1	1	1	1	1	1	1	1	1	1	1	1	1	1	1	1	1	1	1	1	1	1	1	1	1	1	1	1	1	1	1	1	1	1	1	1	1
OG0001514	HOG0001559	74	1	1	1	1	1	1	1	1	1	1	1	1	1	1	1	1	1	1	1	1	1	1	1	1	1	1	1	1	1	1	1	1	1	1	1	1	1	1	1	1	1	1	1	1	1	1	1
OG0001515	HOG0001560	74	1	1	1	1	1	1	1	1	1	1	1	1	1	1	1	1	1	1	1	1	1	1	1	1	1	1	1	1	1	1	1	1	1	1	1	1	1	1	1	1	1	1	1	1	1	1	1
OG0001516	HOG0001561	74	1	1	1	1	1	1	1	1	1	1	1	1	1	1	1	1	1	1	1	1	1	1	1	1	1	1	1	1	1	1	1	1	1	1	1	1	1	1	1	1	1	1	1	1	1	1	1
OG0001517	HOG0001562	74	1	1	1	1	1	1	1	1	1	1	1	1	1	1	1	1	1	1	1	1	1	1	1	1	1	1	1	1	1	1	1	1	1	1	1	1	1	1	1	1	1	1	1	1	1	1	1
OG0001518	HOG0001563	74	1	1	1	1	1	1	1	1	1	1	1	1	1	1	1	1	1	1	1	1	1	1	1	1	1	1	1	1	1	1	1	1	1	1	1	1	1	1	1	1	1	1	1	1	1	1	1
OG0001519	HOG0001564	74	1	1	1	1	1	1	1	1	1	1	1	1	1	1	1	1	1	1	1	1	1	1	1	1	1	1	1	1	1	1	1	1	1	1	1	1	1	1	1	1	1	1	1	1	1	1	1
OG0001520	HOG0001565	74	1	1	1	1	1	1	1	1	1	1	1	1	1	1	1	1	1	1	1	1	1	1	1	1	1	1	1	1	1	1	1	1	1	1	1	1	1	1	1	1	1	1	1	1	1	1	1
OG0001521	HOG0001566	74	1	1	1	1	1	1	1	1	1	1	1	1	1	1	1	1	1	1	1	1	1	1	1	1	1	1	1	1	1	1	1	1	1	1	1	1	1	1	1	1	1	1	1	1	1	1	1
OG0001522	HOG0001567	74	1	1	1	1	1	1	1	1	1	1	1	1	1	1	1	1	1	1	1	1	1	1	1	1	1	1	1	1	1	1	1	1	1	1	1	1	1	1	1	1	1	1	1	1	1	1	1
OG0001523	HOG0001568	74	1	1	1	1	1	1	1	1	1	1	1	1	1	1	1	1	1	1	1	1	1	1	1	1	1	1	1	1	1	1	1	1	1	1	1	1	1	1	1	1	1	1	1	1	1	1	1
OG0001524	HOG0001569	74	1	1	1	1	1	1	1	1	1	1	1	1	1	1	1	1	1	1	1	1	1	1	1	1	1	1	1	1	1	1	1	1	1	1	1	1	1	1	1	1	1	1	1	1	1	1	1
OG0001525	HOG0001570	74	1	1	1	1	1	1	1	1	1	1	1	1	1	1	1	1	1	1	1	1	1	1	1	1	1	1	1	1	1	1	1	1	1	1	1	1	1	1	1	1	1	1	1	1	1	1	1
OG0001526	HOG0001571	74	1	1	1	1	1	1	1	1	1	1	1	1	1	1	1	1	1	1	1	1	1	1	1	1	1	1	1	1	1	1	1	1	1	1	1	1	1	1	1	1	1	1	1	1	1	1	1
OG0001527	HOG0001572	74	1	1	1	1	1	1	1	1	1	1	1	1	1	1	1	1	1	1	1	1	1	1	1	1	1	1	1	1	1	1	1	1	1	1	1	1	1	1	1	1	1	1	1	1	1	1	1
OG0001528	HOG0001573	74	1	1	1	1	1	1	1	1	1	1	1	1	1	1	1	1	1	1	1	1	1	1	1	1	1	1	1	1	1	1	1	1	1	1	1	1	1	1	1	1	1	1	1	1	1	1	1
OG0001529	HOG0001574	74	1	1	1	1	1	1	1	1	1	1	1	1	1	1	1	1	1	1	1	1	1	1	1	1	1	1	1	1	1	1	1	1	1	1	1	1	1	1	1	1	1	1	1	1	1	1	1
OG0001530	HOG0001575	74	1	1	1	1	1	1	1	1	1	1	1	1	1	1	1	1	1	1	1	1	1	1	1	1	1	1	1	1	1	1	1	1	1	1	1	1	1	1	1	1	1	1	1	1	1	1	1
OG0001531	HOG0001576	74	1	1	1	1	1	1	1	1	1	1	1	1	1	1	1	1	1	1	1	1	1	1	1	1	1	1	1	1	1	1	1	1	1	1	1	1	1	1	1	1	1	1	1	1	1	1	1
OG0001532	HOG0001577	74	1	1	1	1	1	1	1	1	1	1	1	1	1	1	1	1	1	1	1	1	1	1	1	1	1	1	1	1	1	1	1	1	1	1	1	1	1	1	1	1	1	1	1	1	1	1	1
OG0001533	HOG0001578	74	1	1	1	1	1	1	1	1	1	1	1	1	1	1	1	1	1	1	1	1	1	1	1	1	1	1	1	1	1	1	1	1	1	1	1	1	1	1	1	1	1	1	1	1	1	1	1
OG0001534	HOG0001579	74	1	1	1	1	1	1	1	1	1	1	1	1	1	1	1	1	1	1	1	1	1	1	1	1	1	1	1	1	1	1	1	1	1	1	1	1	1	1	1	1	1	1	1	1	1	1	1
OG0001535	HOG0001580	74	1	1	1	1	1	1	1	1	1	1	1	1	1	1	1	1	1	1	1	1	1	1	1	1	1	1	1	1	1	1	1	1	1	1	1	1	1	1	1	1	1	1	1	1	1	1	1
OG0001536	HOG0001581	74	1	1	1	1	1	1	1	1	1	1	1	1	1	1	1	1	1	1	1	1	1	1	1	1	1	1	1	1	1	1	1	1	1	1	1	1	1	1	1	1	1	1	1	1	1	1	1
OG0001537	HOG0001582	74	1	1	1	1	1	1	1	1	1	1	1	1	1	1	1	1	1	1	1	1	1	1	1	1	1	1	1	1	1	1	1	1	1	1	1	1	1	1	1	1	1	1	1	1	1	1	1
OG0001538	HOG0001583	74	1	1	1	1	1	1	1	1	1	1	1	1	1	1	1	1	1	1	1	1	1	1	1	1	1	1	1	1	1	1	1	1	1	1	1	1	1	1	1	1	1	1	1	1	1	1	1
OG0001539	HOG0001584	74	1	1	1	1	1	1	1	1	1	1	1	1	1	1	1	1	1	1	1	1	1	1	1	1	1	1	1	1	1	1	1	1	1	1	1	1	1	1	1	1	1	1	1	1	1	1	1
OG0001540	HOG0001585	74	1	1	1	1	1	1	1	1	1	1	1	1	1	1	1	1	1	1	1	1	1	1	1	1	1	1	1	1	1	1	1	1	1	1	1	1	1	1	1	1	1	1	1	1	1	1	1
OG0001541	HOG0001586	74	1	1	1	1	1	1	1	1	1	1	1	1	1	1	1	1	1	1	1	1	1	1	1	1	1	1	1	1	1	1	1	1	1	1	1	1	1	1	1	1	1	1	1	1	1	1	1
OG0001542	HOG0001587	74	1	1	1	1	1	1	1	1	1	1	1	1	1	1	1	1	1	1	1	1	1	1	1	1	1	1	1	1	1	1	1	1	1	1	1	1	1	1	1	1	1	1	1	1	1	1	1
OG0001543	HOG0001588	74	1	1	1	1	1	1	1	1	1	1	1	1	1	1	1	1	1	1	1	1	1	1	1	1	1	1	1	1	1	1	1	1	1	1	1	1	1	1	1	1	1	1	1	1	1	1	1
OG0001544	HOG0001589	74	1	1	1	1	1	1	1	1	1	1	1	1	1	1	1	1	1	1	1	1	1	1	1	1	1	1	1	1	1	1	1	1	1	1	1	1	1	1	1	1	1	1	1	1	1	1	1
OG0001545	HOG0001590	74	1	1	1	1	1	1	1	1	1	1	1	1	1	1	1	1	1	1	1	1	1	1	1	1	1	1	1	1	1	1	1	1	1	1	1	1	1	1	1	1	1	1	1	1	1	1	1
OG0001546	HOG0001591	74	1	1	1	1	1	1	1	1	1	1	1	1	1	1	1	1	1	1	1	1	1	1	1	1	1	1	1	1	1	1	1	1	1	1	1	1	1	1	1	1	1	1	1	1	1	1	1
OG0001547	HOG0001592	74	1	1	1	1	1	1	1	1	1	1	1	1	1	1	1	1	1	1	1	1	1	1	1	1	1	1	1	1	1	1	1	1	1	1	1	1	1	1	1	1	1	1	1	1	1	1	1
OG0001548	HOG0001593	74	1	1	1	1	1	1	1	1	1	1	1	1	1	1	1	1	1	1	1	1	1	1	1	1	1	1	1	1	1	1	1	1	1	1	1	1	1	1	1	1	1	1	1	1	1	1	1
OG0001549	HOG0001594	74	1	1	1	1	1	1	1	1	1	1	1	1	1	1	1	1	1	1	1	1	1	1	1	1	1	1	1	1	1	1	1	1	1	1	1	1	1	1	1	1	1	1	1	1	1	1	1
OG0001550	HOG0001595	74	1	1	1	1	1	1	1	1	1	1	1	1	1	1	1	1	1	1	1	1	1	1	1	1	1	1	1	1	1	1	1	1	1	1	1	1	1	1	1	1	1	1	1	1	1	1	1
OG0001551	HOG0001596	74	1	1	1	1	1	1	1	1	1	1	1	1	1	1	1	1	1	1	1	1	1	1	1	1	1	1	1	1	1	1	1	1	1	1	1	1	1	1	1	1	1	1	1	1	1	1	1
OG0001552	HOG0001597	74	1	1	1	1	1	1	1	1	1	1	1	1	1	1	1	1	1	1	1	1	1	1	1	1	1	1	1	1	1	1	1	1	1	1	1	1	1	1	1	1	1	1	1	1	1	1	1
OG0001553	HOG0001598	74	1	1	1	1	1	1	1	1	1	1	1	1	1	1	1	1	1	1	1	1	1	1	1	1	1	1	1	1	1	1	1	1	1	1	1	1	1	1	1	1	1	1	1	1	1	1	1
OG0001554	HOG0001599	74	1	1	1	1	1	1	1	1	1	1	1	1	1	1	1	1	1	1	1	1	1	1	1	1	1	1	1	1	1	1	1	1	1	1	1	1	1	1	1	1	1	1	1	1	1	1	1
OG0001555	HOG0001600	74	1	1	1	1	1	1	1	1	1	1	1	1	1	1	1	1	1	1	1	1	1	1	1	1	1	1	1	1	1	1	1	1	1	1	1	1	1	1	1	1	1	1	1	1	1	1	1
OG0001556	HOG0001601	74	1	1	1	1	1	1	1	1	1	1	1	1	1	1	1	1	1	1	1	1	1	1	1	1	1	1	1	1	1	1	1	1	1	1	1	1	1	1	1	1	1	1	1	1	1	1	1
OG0001557	HOG0001602	74	1	1	1	1	1	1	1	1	1	1	1	1	1	1	1	1	1	1	1	1	1	1	1	1	1	1	1	1	1	1	1	1	1	1	1	1	1	1	1	1	1	1	1	1	1	1	1
OG0001558	HOG0001603	74	1	1	1	1	1	1	1	1	1	1	1	1	1	1	1	1	1	1	1	1	1	1	1	1	1	1	1	1	1	1	1	1	1	1	1	1	1	1	1	1	1	1	1	1	1	1	1
OG0001559	HOG0001604	74	1	1	1	1	1	1	1	1	1	1	1	1	1	1	1	1	1	1	1	1	1	1	1	1	1	1	1	1	1	1	1	1	1	1	1	1	1	1	1	1	1	1	1	1	1	1	1
OG0001560	HOG0001605	74	1	1	1	1	1	1	1	1	1	1	1	1	1	1	1	1	1	1	1	1	1	1	1	1	1	1	1	1	1	1	1	1	1	1	1	1	1	1	1	1	1	1	1	1	1	1	1
OG0001561	HOG0001606	74	1	1	1	1	1	1	1	1	1	1	1	1	1	1	1	1	1	1	1	1	1	1	1	1	1	1	1	1	1	1	1	1	1	1	1	1	1	1	1	1	1	1	1	1	1	1	1
OG0001562	HOG0001607	74	1	1	1	1	1	1	1	1	1	1	1	1	1	1	1	1	1	1	1	1	1	1	1	1	1	1	1	1	1	1	1	1	1	1	1	1	1	1	1	1	1	1	1	1	1	1	1
OG0001563	HOG0001608	74	1	1	1	1	1	1	1	1	1	1	1	1	1	1	1	1	1	1	1	1	1	1	1	1	1	1	1	1	1	1	1	1	1	1	1	1	1	1	1	1	1	1	1	1	1	1	1
OG0001564	HOG0001609	74	1	1	1	1	1	1	1	1	1	1	1	1	1	1	1	1	1	1	1	1	1	1	1	1	1	1	1	1	1	1	1	1	1	1	1	1	1	1	1	1	1	1	1	1	1	1	1
OG0001565	HOG0001610	74	1	1	1	1	1	1	1	1	1	1	1	1	1	1	1	1	1	1	1	1	1	1	1	1	1	1	1	1	1	1	1	1	1	1	1	1	1	1	1	1	1	1	1	1	1	1	1
OG0001566	HOG0001611	74	1	1	1	1	1	1	1	1	1	1	1	1	1	1	1	1	1	1	1	1	1	1	1	1	1	1	1	1	1	1	1	1	1	1	1	1	1	1	1	1	1	1	1	1	1	1	1
OG0001567	HOG0001612	74	1	1	1	1	1	1	1	1	1	1	1	1	1	1	1	1	1	1	1	1	1	1	1	1	1	1	1	1	1	1	1	1	1	1	1	1	1	1	1	1	1	1	1	1	1	1	1
OG0001568	HOG0001613	74	1	1	1	1	1	1	1	1	1	1	1	1	1	1	1	1	1	1	1	1	1	1	1	1	1	1	1	1	1	1	1	1	1	1	1	1	1	1	1	1	1	1	1	1	1	1	1
OG0001569	HOG0001614	74	1	1	1	1	1	1	1	1	1	1	1	1	1	1	1	1	1	1	1	1	1	1	1	1	1	1	1	1	1	1	1	1	1	1	1	1	1	1	1	1	1	1	1	1	1	1	1
OG0001570	HOG0001615	74	1	1	1	1	1	1	1	1	1	1	1	1	1	1	1	1	1	1	1	1	1	1	1	1	1	1	1	1	1	1	1	1	1	1	1	1	1	1	1	1	1	1	1	1	1	1	1
OG0001571	HOG0001616	74	1	1	1	1	1	1	1	1	1	1	1	1	1	1	1	1	1	1	1	1	1	1	1	1	1	1	1	1	1	1	1	1	1	1	1	1	1	1	1	1	1	1	1	1	1	1	1
OG0001572	HOG0001617	74	1	1	1	1	1	1	1	1	1	1	1	1	1	1	1	1	1	1	1	1	1	1	1	1	1	1	1	1	1	1	1	1	1	1	1	1	1	1	1	1	1	1	1	1	1	1	1
OG0001573	HOG0001618	74	1	1	1	1	1	1	1	1	1	1	1	1	1	1	1	1	1	1	1	1	1	1	1	1	1	1	1	1	1	1	1	1	1	1	1	1	1	1	1	1	1	1	1	1	1	1	1
OG0001574	HOG0001619	74	1	1	1	1	1	1	1	1	1	1	1	1	1	1	1	1	1	1	1	1	1	1	1	1	1	1	1	1	1	1	1	1	1	1	1	1	1	1	1	1	1	1	1	1	1	1	1
OG0001575	HOG0001620	74	1	1	1	1	1	1	1	1	1	1	1	1	1	1	1	1	1	1	1	1	1	1	1	1	1	1	1	1	1	1	1	1	1	1	1	1	1	1	1	1	1	1	1	1	1	1	1
OG0001576	HOG0001621	74	1	1	1	1	1	1	1	1	1	1	1	1	1	1	1	1	1	1	1	1	1	1	1	1	1	1	1	1	1	1	1	1	1	1	1	1	1	1	1	1	1	1	1	1	1	1	1
OG0001577	HOG0001622	74	1	1	1	1	1	1	1	1	1	1	1	1	1	1	1	1	1	1	1	1	1	1	1	1	1	1	1	1	1	1	1	1	1	1	1	1	1	1	1	1	1	1	1	1	1	1	1
OG0001578	HOG0001623	74	1	1	1	1	1	1	1	1	1	1	1	1	1	1	1	1	1	1	1	1	1	1	1	1	1	1	1	1	1	1	1	1	1	1	1	1	1	1	1	1	1	1	1	1	1	1	1
OG0001579	HOG0001624	74	1	1	1	1	1	1	1	1	1	1	1	1	1	1	1	1	1	1	1	1	1	1	1	1	1	1	1	1	1	1	1	1	1	1	1	1	1	1	1	1	1	1	1	1	1	1	1
OG0001580	HOG0001625	74	1	1	1	1	1	1	1	1	1	1	1	1	1	1	1	1	1	1	1	1	1	1	1	1	1	1	1	1	1	1	1	1	1	1	1	1	1	1	1	1	1	1	1	1	1	1	1
OG0001581	HOG0001626	74	1	1	1	1	1	1	1	1	1	1	1	1	1	1	1	1	1	1	1	1	1	1	1	1	1	1	1	1	1	1	1	1	1	1	1	1	1	1	1	1	1	1	1	1	1	1	1
OG0001582	HOG0001627	74	1	1	1	1	1	1	1	1	1	1	1	1	1	1	1	1	1	1	1	1	1	1	1	1	1	1	1	1	1	1	1	1	1	1	1	1	1	1	1	1	1	1	1	1	1	1	1
OG0001583	HOG0001628	74	1	1	1	1	1	1	1	1	1	1	1	1	1	1	1	1	1	1	1	1	1	1	1	1	1	1	1	1	1	1	1	1	1	1	1	1	1	1	1	1	1	1	1	1	1	1	1
OG0001584	HOG0001629	74	1	1	1	1	1	1	1	1	1	1	1	1	1	1	1	1	1	1	1	1	1	1	1	1	1	1	1	1	1	1	1	1	1	1	1	1	1	1	1	1	1	1	1	1	1	1	1
OG0001585	HOG0001630	74	1	1	1	1	1	1	1	1	1	1	1	1	1	1	1	1	1	1	1	1	1	1	1	1	1	1	1	1	1	1	1	1	1	1	1	1	1	1	1	1	1	1	1	1	1	1	1
OG0001586	HOG0001631	74	1	1	1	1	1	1	1	1	1	1	1	1	1	1	1	1	1	1	1	1	1	1	1	1	1	1	1	1	1	1	1	1	1	1	1	1	1	1	1	1	1	1	1	1	1	1	1
OG0001587	HOG0001632	74	1	1	1	1	1	1	1	1	1	1	1	1	1	1	1	1	1	1	1	1	1	1	1	1	1	1	1	1	1	1	1	1	1	1	1	1	1	1	1	1	1	1	1	1	1	1	1
OG0001588	HOG0001633	74	1	1	1	1	1	1	1	1	1	1	1	1	1	1	1	1	1	1	1	1	1	1	1	1	1	1	1	1	1	1	1	1	1	1	1	1	1	1	1	1	1	1	1	1	1	1	1
OG0001589	HOG0001634	74	1	1	1	1	1	1	1	1	1	1	1	1	1	1	1	1	1	1	1	1	1	1	1	1	1	1	1	1	1	1	1	1	1	1	1	1	1	1	1	1	1	1	1	1	1	1	1
OG0001590	HOG0001635	74	1	1	1	1	1	1	1	1	1	1	1	1	1	1	1	1	1	1	1	1	1	1	1	1	1	1	1	1	1	1	1	1	1	1	1	1	1	1	1	1	1	1	1	1	1	1	1
OG0001591	HOG0001636	74	1	1	1	1	1	1	1	1	1	1	1	1	1	1	1	1	1	1	1	1	1	1	1	1	1	1	1	1	1	1	1	1	1	1	1	1	1	1	1	1	1	1	1	1	1	1	1
OG0001592	HOG0001637	74	1	1	1	1	1	1	1	1	1	1	1	1	1	1	1	1	1	1	1	1	1	1	1	1	1	1	1	1	1	1	1	1	1	1	1	1	1	1	1	1	1	1	1	1	1	1	1
OG0001593	HOG0001638	74	1	1	1	1	1	1	1	1	1	1	1	1	1	1	1	1	1	1	1	1	1	1	1	1	1	1	1	1	1	1	1	1	1	1	1	1	1	1	1	1	1	1	1	1	1	1	1
OG0001594	HOG0001639	74	1	1	1	1	1	1	1	1	1	1	1	1	1	1	1	1	1	1	1	1	1	1	1	1	1	1	1	1	1	1	1	1	1	1	1	1	1	1	1	1	1	1	1	1	1	1	1
OG0001595	HOG0001640	74	1	1	1	1	1	1	1	1	1	1	1	1	1	1	1	1	1	1	1	1	1	1	1	1	1	1	1	1	1	1	1	1	1	1	1	1	1	1	1	1	1	1	1	1	1	1	1
OG0001596	HOG0001641	74	1	1	1	1	1	1	1	1	1	1	1	1	1	1	1	1	1	1	1	1	1	1	1	1	1	1	1	1	1	1	1	1	1	1	1	1	1	1	1	1	1	1	1	1	1	1	1
OG0001597	HOG0001642	74	1	1	1	1	1	1	1	1	1	1	1	1	1	1	1	1	1	1	1	1	1	1	1	1	1	1	1	1	1	1	1	1	1	1	1	1	1	1	1	1	1	1	1	1	1	1	1
OG0001598	HOG0001643	74	1	1	1	1	1	1	1	1	1	1	1	1	1	1	1	1	1	1	1	1	1	1	1	1	1	1	1	1	1	1	1	1	1	1	1	1	1	1	1	1	1	1	1	1	1	1	1
OG0001599	HOG0001644	74	1	1	1	1	1	1	1	1	1	1	1	1	1	1	1	1	1	1	1	1	1	1	1	1	1	1	1	1	1	1	1	1	1	1	1	1	1	1	1	1	1	1	1	1	1	1	1
OG0001600	HOG0001645	74	1	1	1	1	1	1	1	1	1	1	1	1	1	1	1	1	1	1	1	1	1	1	1	1	1	1	1	1	1	1	1	1	1	1	1	1	1	1	1	1	1	1	1	1	1	1	1
OG0001601	HOG0001646	74	1	1	1	1	1	1	1	1	1	1	1	1	1	1	1	1	1	1	1	1	1	1	1	1	1	1	1	1	1	1	1	1	1	1	1	1	1	1	1	1	1	1	1	1	1	1	1
OG0001602	HOG0001647	74	1	1	1	1	1	1	1	1	1	1	1	1	1	1	1	1	1	1	1	1	1	1	1	1	1	1	1	1	1	1	1	1	1	1	1	1	1	1	1	1	1	1	1	1	1	1	1
OG0001603	HOG0001648	74	1	1	1	1	1	1	1	1	1	1	1	1	1	1	1	1	1	1	1	1	1	1	1	1	1	1	1	1	1	1	1	1	1	1	1	1	1	1	1	1	1	1	1	1	1	1	1
OG0001604	HOG0001649	74	1	1	1	1	1	1	1	1	1	1	1	1	1	1	1	1	1	1	1	1	1	1	1	1	1	1	1	1	1	1	1	1	1	1	1	1	1	1	1	1	1	1	1	1	1	1	1
OG0001605	HOG0001650	74	1	1	1	1	1	1	1	1	1	1	1	1	1	1	1	1	1	1	1	1	1	1	1	1	1	1	1	1	1	1	1	1	1	1	1	1	1	1	1	1	1	1	1	1	1	1	1
OG0001606	HOG0001651	74	1	1	1	1	1	1	1	1	1	1	1	1	1	1	1	1	1	1	1	1	1	1	1	1	1	1	1	1	1	1	1	1	1	1	1	1	1	1	1	1	1	1	1	1	1	1	1
OG0001607	HOG0001652	74	1	1	1	1	1	1	1	1	1	1	1	1	1	1	1	1	1	1	1	1	1	1	1	1	1	1	1	1	1	1	1	1	1	1	1	1	1	1	1	1	1	1	1	1	1	1	1
OG0001608	HOG0001653	74	1	1	1	1	1	1	1	1	1	1	1	1	1	1	1	1	1	1	1	1	1	1	1	1	1	1	1	1	1	1	1	1	1	1	1	1	1	1	1	1	1	1	1	1	1	1	1
OG0001609	HOG0001654	74	1	1	1	1	1	1	1	1	1	1	1	1	1	1	1	1	1	1	1	1	1	1	1	1	1	1	1	1	1	1	1	1	1	1	1	1	1	1	1	1	1	1	1	1	1	1	1
OG0001610	HOG0001655	74	1	1	1	1	1	1	1	1	1	1	1	1	1	1	1	1	1	1	1	1	1	1	1	1	1	1	1	1	1	1	1	1	1	1	1	1	1	1	1	1	1	1	1	1	1	1	1
OG0001611	HOG0001656	74	1	1	1	1	1	1	1	1	1	1	1	1	1	1	1	1	1	1	1	1	1	1	1	1	1	1	1	1	1	1	1	1	1	1	1	1	1	1	1	1	1	1	1	1	1	1	1
OG0001612	HOG0001657	74	1	1	1	1	1	1	1	1	1	1	1	1	1	1	1	1	1	1	1	1	1	1	1	1	1	1	1	1	1	1	1	1	1	1	1	1	1	1	1	1	1	1	1	1	1	1	1
OG0001613	HOG0001658	74	1	1	1	1	1	1	1	1	1	1	1	1	1	1	1	1	1	1	1	1	1	1	1	1	1	1	1	1	1	1	1	1	1	1	1	1	1	1	1	1	1	1	1	1	1	1	1
OG0001614	HOG0001659	74	1	1	1	1	1	1	1	1	1	1	1	1	1	1	1	1	1	1	1	1	1	1	1	1	1	1	1	1	1	1	1	1	1	1	1	1	1	1	1	1	1	1	1	1	1	1	1
OG0001615	HOG0001660	74	1	1	1	1	1	1	1	1	1	1	1	1	1	1	1	1	1	1	1	1	1	1	1	1	1	1	1	1	1	1	1	1	1	1	1	1	1	1	1	1	1	1	1	1	1	1	1
OG0001616	HOG0001661	74	1	1	1	1	1	1	1	1	1	1	1	1	1	1	1	1	1	1	1	1	1	1	1	1	1	1	1	1	1	1	1	1	1	1	1	1	1	1	1	1	1	1	1	1	1	1	1
OG0001617	HOG0001662	74	1	1	1	1	1	1	1	1	1	1	1	1	1	1	1	1	1	1	1	1	1	1	1	1	1	1	1	1	1	1	1	1	1	1	1	1	1	1	1	1	1	1	1	1	1	1	1
OG0001618	HOG0001663	74	1	1	1	1	1	1	1	1	1	1	1	1	1	1	1	1	1	1	1	1	1	1	1	1	1	1	1	1	1	1	1	1	1	1	1	1	1	1	1	1	1	1	1	1	1	1	1
OG0001619	HOG0001664	74	1	1	1	1	1	1	1	1	1	1	1	1	1	1	1	1	1	1	1	1	1	1	1	1	1	1	1	1	1	1	1	1	1	1	1	1	1	1	1	1	1	1	1	1	1	1	1
OG0001620	HOG0001665	74	1	1	1	1	1	1	1	1	1	1	1	1	1	1	1	1	1	1	1	1	1	1	1	1	1	1	1	1	1	1	1	1	1	1	1	1	1	1	1	1	1	1	1	1	1	1	1
OG0001621	HOG0001666	74	1	1	1	1	1	1	1	1	1	1	1	1	1	1	1	1	1	1	1	1	1	1	1	1	1	1	1	1	1	1	1	1	1	1	1	1	1	1	1	1	1	1	1	1	1	1	1
OG0001622	HOG0001667	74	1	1	1	1	1	1	1	1	1	1	1	1	1	1	1	1	1	1	1	1	1	1	1	1	1	1	1	1	1	1	1	1	1	1	1	1	1	1	1	1	1	1	1	1	1	1	1
OG0001623	HOG0001668	74	1	1	1	1	1	1	1	1	1	1	1	1	1	1	1	1	1	1	1	1	1	1	1	1	1	1	1	1	1	1	1	1	1	1	1	1	1	1	1	1	1	1	1	1	1	1	1
OG0001624	HOG0001669	74	1	1	1	1	1	1	1	1	1	1	1	1	1	1	1	1	1	1	1	1	1	1	1	1	1	1	1	1	1	1	1	1	1	1	1	1	1	1	1	1	1	1	1	1	1	1	1
OG0001625	HOG0001670	74	1	1	1	1	1	1	1	1	1	1	1	1	1	1	1	1	1	1	1	1	1	1	1	1	1	1	1	1	1	1	1	1	1	1	1	1	1	1	1	1	1	1	1	1	1	1	1
OG0001626	HOG0001671	74	1	1	1	1	1	1	1	1	1	1	1	1	1	1	1	1	1	1	1	1	1	1	1	1	1	1	1	1	1	1	1	1	1	1	1	1	1	1	1	1	1	1	1	1	1	1	1
OG0001627	HOG0001672	74	1	1	1	1	1	1	1	1	1	1	1	1	1	1	1	1	1	1	1	1	1	1	1	1	1	1	1	1	1	1	1	1	1	1	1	1	1	1	1	1	1	1	1	1	1	1	1
OG0001628	HOG0001673	74	1	1	1	1	1	1	1	1	1	1	1	1	1	1	1	1	1	1	1	1	1	1	1	1	1	1	1	1	1	1	1	1	1	1	1	1	1	1	1	1	1	1	1	1	1	1	1
OG0001629	HOG0001674	74	1	1	1	1	1	1	1	1	1	1	1	1	1	1	1	1	1	1	1	1	1	1	1	1	1	1	1	1	1	1	1	1	1	1	1	1	1	1	1	1	1	1	1	1	1	1	1
OG0001630	HOG0001675	74	1	1	1	1	1	1	1	1	1	1	1	1	1	1	1	1	1	1	1	1	1	1	1	1	1	1	1	1	1	1	1	1	1	1	1	1	1	1	1	1	1	1	1	1	1	1	1
OG0001631	HOG0001676	74	1	1	1	1	1	1	1	1	1	1	1	1	1	1	1	1	1	1	1	1	1	1	1	1	1	1	1	1	1	1	1	1	1	1	1	1	1	1	1	1	1	1	1	1	1	1	1
OG0001632	HOG0001677	74	1	1	1	1	1	1	1	1	1	1	1	1	1	1	1	1	1	1	1	1	1	1	1	1	1	1	1	1	1	1	1	1	1	1	1	1	1	1	1	1	1	1	1	1	1	1	1
OG0001633	HOG0001678	74	1	1	1	1	1	1	1	1	1	1	1	1	1	1	1	1	1	1	1	1	1	1	1	1	1	1	1	1	1	1	1	1	1	1	1	1	1	1	1	1	1	1	1	1	1	1	1
OG0001634	HOG0001679	74	1	1	1	1	1	1	1	1	1	1	1	1	1	1	1	1	1	1	1	1	1	1	1	1	1	1	1	1	1	1	1	1	1	1	1	1	1	1	1	1	1	1	1	1	1	1	1
OG0001635	HOG0001680	74	1	1	1	1	1	1	1	1	1	1	1	1	1	1	1	1	1	1	1	1	1	1	1	1	1	1	1	1	1	1	1	1	1	1	1	1	1	1	1	1	1	1	1	1	1	1	1
OG0001636	HOG0001681	74	1	1	1	1	1	1	1	1	1	1	1	1	1	1	1	1	1	1	1	1	1	1	1	1	1	1	1	1	1	1	1	1	1	1	1	1	1	1	1	1	1	1	1	1	1	1	1
OG0001637	HOG0001682	74	1	1	1	1	1	1	1	1	1	1	1	1	1	1	1	1	1	1	1	1	1	1	1	1	1	1	1	1	1	1	1	1	1	1	1	1	1	1	1	1	1	1	1	1	1	1	1
OG0001638	HOG0001683	74	1	1	1	1	1	1	1	1	1	1	1	1	1	1	1	1	1	1	1	1	1	1	1	1	1	1	1	1	1	1	1	1	1	1	1	1	1	1	1	1	1	1	1	1	1	1	1
OG0001639	HOG0001684	74	1	1	1	1	1	1	1	1	1	1	1	1	1	1	1	1	1	1	1	1	1	1	1	1	1	1	1	1	1	1	1	1	1	1	1	1	1	1	1	1	1	1	1	1	1	1	1
OG0001640	HOG0001685	74	1	1	1	1	1	1	1	1	1	1	1	1	1	1	1	1	1	1	1	1	1	1	1	1	1	1	1	1	1	1	1	1	1	1	1	1	1	1	1	1	1	1	1	1	1	1	1
OG0001641	HOG0001686	74	1	1	1	1	1	1	1	1	1	1	1	1	1	1	1	1	1	1	1	1	1	1	1	1	1	1	1	1	1	1	1	1	1	1	1	1	1	1	1	1	1	1	1	1	1	1	1
OG0001642	HOG0001687	74	1	1	1	1	1	1	1	1	1	1	1	1	1	1	1	1	1	1	1	1	1	1	1	1	1	1	1	1	1	1	1	1	1	1	1	1	1	1	1	1	1	1	1	1	1	1	1
OG0001643	HOG0001688	74	1	1	1	1	1	1	1	1	1	1	1	1	1	1	1	1	1	1	1	1	1	1	1	1	1	1	1	1	1	1	1	1	1	1	1	1	1	1	1	1	1	1	1	1	1	1	1
OG0001644	HOG0001689	74	1	1	1	1	1	1	1	1	1	1	1	1	1	1	1	1	1	1	1	1	1	1	1	1	1	1	1	1	1	1	1	1	1	1	1	1	1	1	1	1	1	1	1	1	1	1	1
OG0001645	HOG0001690	74	1	1	1	1	1	1	1	1	1	1	1	1	1	1	1	1	1	1	1	1	1	1	1	1	1	1	1	1	1	1	1	1	1	1	1	1	1	1	1	1	1	1	1	1	1	1	1
OG0001646	HOG0001691	74	1	1	1	1	1	1	1	1	1	1	1	1	1	1	1	1	1	1	1	1	1	1	1	1	1	1	1	1	1	1	1	1	1	1	1	1	1	1	1	1	1	1	1	1	1	1	1
OG0001647	HOG0001692	74	1	1	1	1	1	1	1	1	1	1	1	1	1	1	1	1	1	1	1	1	1	1	1	1	1	1	1	1	1	1	1	1	1	1	1	1	1	1	1	1	1	1	1	1	1	1	1
OG0001648	HOG0001693	74	1	1	1	1	1	1	1	1	1	1	1	1	1	1	1	1	1	1	1	1	1	1	1	1	1	1	1	1	1	1	1	1	1	1	1	1	1	1	1	1	1	1	1	1	1	1	1
OG0001649	HOG0001694	74	1	1	1	1	1	1	1	1	1	1	1	1	1	1	1	1	1	1	1	1	1	1	1	1	1	1	1	1	1	1	1	1	1	1	1	1	1	1	1	1	1	1	1	1	1	1	1
OG0001650	HOG0001695	74	1	1	1	1	1	1	1	1	1	1	1	1	1	1	1	1	1	1	1	1	1	1	1	1	1	1	1	1	1	1	1	1	1	1	1	1	1	1	1	1	1	1	1	1	1	1	1
OG0001651	HOG0001696	74	1	1	1	1	1	1	1	1	1	1	1	1	1	1	1	1	1	1	1	1	1	1	1	1	1	1	1	1	1	1	1	1	1	1	1	1	1	1	1	1	1	1	1	1	1	1	1
OG0001652	HOG0001697	74	1	1	1	1	1	1	1	1	1	1	1	1	1	1	1	1	1	1	1	1	1	1	1	1	1	1	1	1	1	1	1	1	1	1	1	1	1	1	1	1	1	1	1	1	1	1	1
OG0001653	HOG0001698	74	1	1	1	1	1	1	1	1	1	1	1	1	1	1	1	1	1	1	1	1	1	1	1	1	1	1	1	1	1	1	1	1	1	1	1	1	1	1	1	1	1	1	1	1	1	1	1
OG0001654	HOG0001699	74	1	1	1	1	1	1	1	1	1	1	1	1	1	1	1	1	1	1	1	1	1	1	1	1	1	1	1	1	1	1	1	1	1	1	1	1	1	1	1	1	1	1	1	1	1	1	1
OG0001655	HOG0001700	74	1	1	1	1	1	1	1	1	1	1	1	1	1	1	1	1	1	1	1	1	1	1	1	1	1	1	1	1	1	1	1	1	1	1	1	1	1	1	1	1	1	1	1	1	1	1	1
OG0001656	HOG0001701	74	1	1	1	1	1	1	1	1	1	1	1	1	1	1	1	1	1	1	1	1	1	1	1	1	1	1	1	1	1	1	1	1	1	1	1	1	1	1	1	1	1	1	1	1	1	1	1
OG0001657	HOG0001702	74	1	1	1	1	1	1	1	1	1	1	1	1	1	1	1	1	1	1	1	1	1	1	1	1	1	1	1	1	1	1	1	1	1	1	1	1	1	1	1	1	1	1	1	1	1	1	1
OG0001658	HOG0001703	74	1	1	1	1	1	1	1	1	1	1	1	1	1	1	1	1	1	1	1	1	1	1	1	1	1	1	1	1	1	1	1	1	1	1	1	1	1	1	1	1	1	1	1	1	1	1	1
OG0001659	HOG0001704	74	1	1	1	1	1	1	1	1	1	1	1	1	1	1	1	1	1	1	1	1	1	1	1	1	1	1	1	1	1	1	1	1	1	1	1	1	1	1	1	1	1	1	1	1	1	1	1
OG0001660	HOG0001705	74	1	1	1	1	1	1	1	1	1	1	1	1	1	1	1	1	1	1	1	1	1	1	1	1	1	1	1	1	1	1	1	1	1	1	1	1	1	1	1	1	1	1	1	1	1	1	1
OG0001661	HOG0001706	74	1	1	1	1	1	1	1	1	1	1	1	1	1	1	1	1	1	1	1	1	1	1	1	1	1	1	1	1	1	1	1	1	1	1	1	1	1	1	1	1	1	1	1	1	1	1	1
OG0001662	HOG0001707	74	1	1	1	1	1	1	1	1	1	1	1	1	1	1	1	1	1	1	1	1	1	1	1	1	1	1	1	1	1	1	1	1	1	1	1	1	1	1	1	1	1	1	1	1	1	1	1
OG0001663	HOG0001708	74	1	1	1	1	1	1	1	1	1	1	1	1	1	1	1	1	1	1	1	1	1	1	1	1	1	1	1	1	1	1	1	1	1	1	1	1	1	1	1	1	1	1	1	1	1	1	1
OG0001664	HOG0001709	74	1	1	1	1	1	1	1	1	1	1	1	1	1	1	1	1	1	1	1	1	1	1	1	1	1	1	1	1	1	1	1	1	1	1	1	1	1	1	1	1	1	1	1	1	1	1	1
OG0001665	HOG0001710	74	1	1	1	1	1	1	1	1	1	1	1	1	1	1	1	1	1	1	1	1	1	1	1	1	1	1	1	1	1	1	1	1	1	1	1	1	1	1	1	1	1	1	1	1	1	1	1
OG0001666	HOG0001711	74	1	1	1	1	1	1	1	1	1	1	1	1	1	1	1	1	1	1	1	1	1	1	1	1	1	1	1	1	1	1	1	1	1	1	1	1	1	1	1	1	1	1	1	1	1	1	1
OG0001667	HOG0001712	74	1	1	1	1	1	1	1	1	1	1	1	1	1	1	1	1	1	1	1	1	1	1	1	1	1	1	1	1	1	1	1	1	1	1	1	1	1	1	1	1	1	1	1	1	1	1	1
OG0001668	HOG0001713	74	1	1	1	1	1	1	1	1	1	1	1	1	1	1	1	1	1	1	1	1	1	1	1	1	1	1	1	1	1	1	1	1	1	1	1	1	1	1	1	1	1	1	1	1	1	1	1
OG0001669	HOG0001714	74	1	1	1	1	1	1	1	1	1	1	1	1	1	1	1	1	1	1	1	1	1	1	1	1	1	1	1	1	1	1	1	1	1	1	1	1	1	1	1	1	1	1	1	1	1	1	1
OG0001670	HOG0001715	74	1	1	1	1	1	1	1	1	1	1	1	1	1	1	1	1	1	1	1	1	1	1	1	1	1	1	1	1	1	1	1	1	1	1	1	1	1	1	1	1	1	1	1	1	1	1	1
OG0001671	HOG0001716	74	1	1	1	1	1	1	1	1	1	1	1	1	1	1	1	1	1	1	1	1	1	1	1	1	1	1	1	1	1	1	1	1	1	1	1	1	1	1	1	1	1	1	1	1	1	1	1
OG0001672	HOG0001717	74	1	1	1	1	1	1	1	1	1	1	1	1	1	1	1	1	1	1	1	1	1	1	1	1	1	1	1	1	1	1	1	1	1	1	1	1	1	1	1	1	1	1	1	1	1	1	1
OG0001673	HOG0001718	74	1	1	1	1	1	1	1	1	1	1	1	1	1	1	1	1	1	1	1	1	1	1	1	1	1	1	1	1	1	1	1	1	1	1	1	1	1	1	1	1	1	1	1	1	1	1	1
OG0001674	HOG0001719	74	1	1	1	1	1	1	1	1	1	1	1	1	1	1	1	1	1	1	1	1	1	1	1	1	1	1	1	1	1	1	1	1	1	1	1	1	1	1	1	1	1	1	1	1	1	1	1
OG0001675	HOG0001720	74	1	1	1	1	1	1	1	1	1	1	1	1	1	1	1	1	1	1	1	1	1	1	1	1	1	1	1	1	1	1	1	1	1	1	1	1	1	1	1	1	1	1	1	1	1	1	1
OG0001676	HOG0001721	74	1	1	1	1	1	1	1	1	1	1	1	1	1	1	1	1	1	1	1	1	1	1	1	1	1	1	1	1	1	1	1	1	1	1	1	1	1	1	1	1	1	1	1	1	1	1	1
OG0001677	HOG0001722	74	1	1	1	1	1	1	1	1	1	1	1	1	1	1	1	1	1	1	1	1	1	1	1	1	1	1	1	1	1	1	1	1	1	1	1	1	1	1	1	1	1	1	1	1	1	1	1
OG0001678	HOG0001723	74	1	1	1	1	1	1	1	1	1	1	1	1	1	1	1	1	1	1	1	1	1	1	1	1	1	1	1	1	1	1	1	1	1	1	1	1	1	1	1	1	1	1	1	1	1	1	1
OG0001679	HOG0001724	74	1	1	1	1	1	1	1	1	1	1	1	1	1	1	1	1	1	1	1	1	1	1	1	1	1	1	1	1	1	1	1	1	1	1	1	1	1	1	1	1	1	1	1	1	1	1	1
OG0001680	HOG0001725	74	1	1	1	1	1	1	1	1	1	1	1	1	1	1	1	1	1	1	1	1	1	1	1	1	1	1	1	1	1	1	1	1	1	1	1	1	1	1	1	1	1	1	1	1	1	1	1
OG0001681	HOG0001726	74	1	1	1	1	1	1	1	1	1	1	1	1	1	1	1	1	1	1	1	1	1	1	1	1	1	1	1	1	1	1	1	1	1	1	1	1	1	1	1	1	1	1	1	1	1	1	1
OG0001682	HOG0001727	74	1	1	1	1	1	1	1	1	1	1	1	1	1	1	1	1	1	1	1	1	1	1	1	1	1	1	1	1	1	1	1	1	1	1	1	1	1	1	1	1	1	1	1	1	1	1	1
OG0001683	HOG0001728	74	1	1	1	1	1	1	1	1	1	1	1	1	1	1	1	1	1	1	1	1	1	1	1	1	1	1	1	1	1	1	1	1	1	1	1	1	1	1	1	1	1	1	1	1	1	1	1
OG0001684	HOG0001729	74	1	1	1	1	1	1	1	1	1	1	1	1	1	1	1	1	1	1	1	1	1	1	1	1	1	1	1	1	1	1	1	1	1	1	1	1	1	1	1	1	1	1	1	1	1	1	1
OG0001685	HOG0001730	74	1	1	1	1	1	1	1	1	1	1	1	1	1	1	1	1	1	1	1	1	1	1	1	1	1	1	1	1	1	1	1	1	1	1	1	1	1	1	1	1	1	1	1	1	1	1	1
OG0001686	HOG0001731	74	1	1	1	1	1	1	1	1	1	1	1	1	1	1	1	1	1	1	1	1	1	1	1	1	1	1	1	1	1	1	1	1	1	1	1	1	1	1	1	1	1	1	1	1	1	1	1
OG0001687	HOG0001732	74	1	1	1	1	1	1	1	1	1	1	1	1	1	1	1	1	1	1	1	1	1	1	1	1	1	1	1	1	1	1	1	1	1	1	1	1	1	1	1	1	1	1	1	1	1	1	1
OG0001688	HOG0001733	74	1	1	1	1	1	1	1	1	1	1	1	1	1	1	1	1	1	1	1	1	1	1	1	1	1	1	1	1	1	1	1	1	1	1	1	1	1	1	1	1	1	1	1	1	1	1	1
OG0001689	HOG0001734	74	1	1	1	1	1	1	1	1	1	1	1	1	1	1	1	1	1	1	1	1	1	1	1	1	1	1	1	1	1	1	1	1	1	1	1	1	1	1	1	1	1	1	1	1	1	1	1
OG0001690	HOG0001735	74	1	1	1	1	1	1	1	1	1	1	1	1	1	1	1	1	1	1	1	1	1	1	1	1	1	1	1	1	1	1	1	1	1	1	1	1	1	1	1	1	1	1	1	1	1	1	1
OG0001691	HOG0001736	74	1	1	1	1	1	1	1	1	1	1	1	1	1	1	1	1	1	1	1	1	1	1	1	1	1	1	1	1	1	1	1	1	1	1	1	1	1	1	1	1	1	1	1	1	1	1	1
OG0001692	HOG0001737	74	1	1	1	1	1	1	1	1	1	1	1	1	1	1	1	1	1	1	1	1	1	1	1	1	1	1	1	1	1	1	1	1	1	1	1	1	1	1	1	1	1	1	1	1	1	1	1
OG0001693	HOG0001738	74	1	1	1	1	1	1	1	1	1	1	1	1	1	1	1	1	1	1	1	1	1	1	1	1	1	1	1	1	1	1	1	1	1	1	1	1	1	1	1	1	1	1	1	1	1	1	1
OG0001694	HOG0001739	74	1	1	1	1	1	1	1	1	1	1	1	1	1	1	1	1	1	1	1	1	1	1	1	1	1	1	1	1	1	1	1	1	1	1	1	1	1	1	1	1	1	1	1	1	1	1	1
OG0001695	HOG0001740	74	1	1	1	1	1	1	1	1	1	1	1	1	1	1	1	1	1	1	1	1	1	1	1	1	1	1	1	1	1	1	1	1	1	1	1	1	1	1	1	1	1	1	1	1	1	1	1
OG0001696	HOG0001741	74	1	1	1	1	1	1	1	1	1	1	1	1	1	1	1	1	1	1	1	1	1	1	1	1	1	1	1	1	1	1	1	1	1	1	1	1	1	1	1	1	1	1	1	1	1	1	1
OG0001697	HOG0001742	74	1	1	1	1	1	1	1	1	1	1	1	1	1	1	1	1	1	1	1	1	1	1	1	1	1	1	1	1	1	1	1	1	1	1	1	1	1	1	1	1	1	1	1	1	1	1	1
OG0001698	HOG0001743	74	1	1	1	1	1	1	1	1	1	1	1	1	1	1	1	1	1	1	1	1	1	1	1	1	1	1	1	1	1	1	1	1	1	1	1	1	1	1	1	1	1	1	1	1	1	1	1
OG0001699	HOG0001744	74	1	1	1	1	1	1	1	1	1	1	1	1	1	1	1	1	1	1	1	1	1	1	1	1	1	1	1	1	1	1	1	1	1	1	1	1	1	1	1	1	1	1	1	1	1	1	1
OG0001700	HOG0001745	74	1	1	1	1	1	1	1	1	1	1	1	1	1	1	1	1	1	1	1	1	1	1	1	1	1	1	1	1	1	1	1	1	1	1	1	1	1	1	1	1	1	1	1	1	1	1	1
OG0001701	HOG0001746	74	1	1	1	1	1	1	1	1	1	1	1	1	1	1	1	1	1	1	1	1	1	1	1	1	1	1	1	1	1	1	1	1	1	1	1	1	1	1	1	1	1	1	1	1	1	1	1
OG0001702	HOG0001747	74	1	1	1	1	1	1	1	1	1	1	1	1	1	1	1	1	1	1	1	1	1	1	1	1	1	1	1	1	1	1	1	1	1	1	1	1	1	1	1	1	1	1	1	1	1	1	1
OG0001703	HOG0001748	74	1	1	1	1	1	1	1	1	1	1	1	1	1	1	1	1	1	1	1	1	1	1	1	1	1	1	1	1	1	1	1	1	1	1	1	1	1	1	1	1	1	1	1	1	1	1	1
OG0001704	HOG0001749	74	1	1	1	1	1	1	1	1	1	1	1	1	1	1	1	1	1	1	1	1	1	1	1	1	1	1	1	1	1	1	1	1	1	1	1	1	1	1	1	1	1	1	1	1	1	1	1
OG0001705	HOG0001750	74	1	1	1	1	1	1	1	1	1	1	1	1	1	1	1	1	1	1	1	1	1	1	1	1	1	1	1	1	1	1	1	1	1	1	1	1	1	1	1	1	1	1	1	1	1	1	1
OG0001706	HOG0001751	74	1	1	1	1	1	1	1	1	1	1	1	1	1	1	1	1	1	1	1	1	1	1	1	1	1	1	1	1	1	1	1	1	1	1	1	1	1	1	1	1	1	1	1	1	1	1	1
OG0001707	HOG0001752	74	1	1	1	1	1	1	1	1	1	1	1	1	1	1	1	1	1	1	1	1	1	1	1	1	1	1	1	1	1	1	1	1	1	1	1	1	1	1	1	1	1	1	1	1	1	1	1
OG0001708	HOG0001753	74	1	1	1	1	1	1	1	1	1	1	1	1	1	1	1	1	1	1	1	1	1	1	1	1	1	1	1	1	1	1	1	1	1	1	1	1	1	1	1	1	1	1	1	1	1	1	1
OG0001709	HOG0001754	74	1	1	1	1	1	1	1	1	1	1	1	1	1	1	1	1	1	1	1	1	1	1	1	1	1	1	1	1	1	1	1	1	1	1	1	1	1	1	1	1	1	1	1	1	1	1	1
OG0001710	HOG0001755	74	1	1	1	1	1	1	1	1	1	1	1	1	1	1	1	1	1	1	1	1	1	1	1	1	1	1	1	1	1	1	1	1	1	1	1	1	1	1	1	1	1	1	1	1	1	1	1
OG0001711	HOG0001756	74	1	1	1	1	1	1	1	1	1	1	1	1	1	1	1	1	1	1	1	1	1	1	1	1	1	1	1	1	1	1	1	1	1	1	1	1	1	1	1	1	1	1	1	1	1	1	1
OG0001712	HOG0001757	74	1	1	1	1	1	1	1	1	1	1	1	1	1	1	1	1	1	1	1	1	1	1	1	1	1	1	1	1	1	1	1	1	1	1	1	1	1	1	1	1	1	1	1	1	1	1	1
OG0001713	HOG0001758	74	1	1	1	1	1	1	1	1	1	1	1	1	1	1	1	1	1	1	1	1	1	1	1	1	1	1	1	1	1	1	1	1	1	1	1	1	1	1	1	1	1	1	1	1	1	1	1
OG0001714	HOG0001759	74	1	1	1	1	1	1	1	1	1	1	1	1	1	1	1	1	1	1	1	1	1	1	1	1	1	1	1	1	1	1	1	1	1	1	1	1	1	1	1	1	1	1	1	1	1	1	1
OG0001715	HOG0001760	74	1	1	1	1	1	1	1	1	1	1	1	1	1	1	1	1	1	1	1	1	1	1	1	1	1	1	1	1	1	1	1	1	1	1	1	1	1	1	1	1	1	1	1	1	1	1	1
OG0001716	HOG0001761	74	1	1	1	1	1	1	1	1	1	1	1	1	1	1	1	1	1	1	1	1	1	1	1	1	1	1	1	1	1	1	1	1	1	1	1	1	1	1	1	1	1	1	1	1	1	1	1
OG0001717	HOG0001762	74	1	1	1	1	1	1	1	1	1	1	1	1	1	1	1	1	1	1	1	1	1	1	1	1	1	1	1	1	1	1	1	1	1	1	1	1	1	1	1	1	1	1	1	1	1	1	1
OG0001718	HOG0001763	74	1	1	1	1	1	1	1	1	1	1	1	1	1	1	1	1	1	1	1	1	1	1	1	1	1	1	1	1	1	1	1	1	1	1	1	1	1	1	1	1	1	1	1	1	1	1	1
OG0001719	HOG0001764	74	1	1	1	1	1	1	1	1	1	1	1	1	1	1	1	1	1	1	1	1	1	1	1	1	1	1	1	1	1	1	1	1	1	1	1	1	1	1	1	1	1	1	1	1	1	1	1
OG0001720	HOG0001765	74	1	1	1	1	1	1	1	1	1	1	1	1	1	1	1	1	1	1	1	1	1	1	1	1	1	1	1	1	1	1	1	1	1	1	1	1	1	1	1	1	1	1	1	1	1	1	1
OG0001721	HOG0001766	74	1	1	1	1	1	1	1	1	1	1	1	1	1	1	1	1	1	1	1	1	1	1	1	1	1	1	1	1	1	1	1	1	1	1	1	1	1	1	1	1	1	1	1	1	1	1	1
OG0001722	HOG0001767	74	1	1	1	1	1	1	1	1	1	1	1	1	1	1	1	1	1	1	1	1	1	1	1	1	1	1	1	1	1	1	1	1	1	1	1	1	1	1	1	1	1	1	1	1	1	1	1
OG0001723	HOG0001768	74	1	1	1	1	1	1	1	1	1	1	1	1	1	1	1	1	1	1	1	1	1	1	1	1	1	1	1	1	1	1	1	1	1	1	1	1	1	1	1	1	1	1	1	1	1	1	1
OG0001724	HOG0001769	74	1	1	1	1	1	1	1	1	1	1	1	1	1	1	1	1	1	1	1	1	1	1	1	1	1	1	1	1	1	1	1	1	1	1	1	1	1	1	1	1	1	1	1	1	1	1	1
OG0001725	HOG0001770	74	1	1	1	1	1	1	1	1	1	1	1	1	1	1	1	1	1	1	1	1	1	1	1	1	1	1	1	1	1	1	1	1	1	1	1	1	1	1	1	1	1	1	1	1	1	1	1
OG0001726	HOG0001771	74	1	1	1	1	1	1	1	1	1	1	1	1	1	1	1	1	1	1	1	1	1	1	1	1	1	1	1	1	1	1	1	1	1	1	1	1	1	1	1	1	1	1	1	1	1	1	1
OG0001727	HOG0001772	74	1	1	1	1	1	1	1	1	1	1	1	1	1	1	1	1	1	1	1	1	1	1	1	1	1	1	1	1	1	1	1	1	1	1	1	1	1	1	1	1	1	1	1	1	1	1	1
OG0001728	HOG0001773	74	1	1	1	1	1	1	1	1	1	1	1	1	1	1	1	1	1	1	1	1	1	1	1	1	1	1	1	1	1	1	1	1	1	1	1	1	1	1	1	1	1	1	1	1	1	1	1
OG0001729	HOG0001774	74	1	1	1	1	1	1	1	1	1	1	1	1	1	1	1	1	1	1	1	1	1	1	1	1	1	1	1	1	1	1	1	1	1	1	1	1	1	1	1	1	1	1	1	1	1	1	1
OG0001730	HOG0001775	74	1	1	1	1	1	1	1	1	1	1	1	1	1	1	1	1	1	1	1	1	1	1	1	1	1	1	1	1	1	1	1	1	1	1	1	1	1	1	1	1	1	1	1	1	1	1	1
OG0001731	HOG0001776	74	1	1	1	1	1	1	1	1	1	1	1	1	1	1	1	1	1	1	1	1	1	1	1	1	1	1	1	1	1	1	1	1	1	1	1	1	1	1	1	1	1	1	1	1	1	1	1
OG0001732	HOG0001777	74	1	1	1	1	1	1	1	1	1	1	1	1	1	1	1	1	1	1	1	1	1	1	1	1	1	1	1	1	1	1	1	1	1	1	1	1	1	1	1	1	1	1	1	1	1	1	1
OG0001733	HOG0001778	74	1	1	1	1	1	1	1	1	1	1	1	1	1	1	1	1	1	1	1	1	1	1	1	1	1	1	1	1	1	1	1	1	1	1	1	1	1	1	1	1	1	1	1	1	1	1	1
OG0001734	HOG0001779	74	1	1	1	1	1	1	1	1	1	1	1	1	1	1	1	1	1	1	1	1	1	1	1	1	1	1	1	1	1	1	1	1	1	1	1	1	1	1	1	1	1	1	1	1	1	1	1
OG0001735	HOG0001780	74	1	1	1	1	1	1	1	1	1	1	1	1	1	1	1	1	1	1	1	1	1	1	1	1	1	1	1	1	1	1	1	1	1	1	1	1	1	1	1	1	1	1	1	1	1	1	1
OG0001736	HOG0001781	74	1	1	1	1	1	1	1	1	1	1	1	1	1	1	1	1	1	1	1	1	1	1	1	1	1	1	1	1	1	1	1	1	1	1	1	1	1	1	1	1	1	1	1	1	1	1	1
OG0001737	HOG0001782	74	1	1	1	1	1	1	1	1	1	1	1	1	1	1	1	1	1	1	1	1	1	1	1	1	1	1	1	1	1	1	1	1	1	1	1	1	1	1	1	1	1	1	1	1	1	1	1
OG0001738	HOG0001783	74	1	1	1	1	1	1	1	1	1	1	1	1	1	1	1	1	1	1	1	1	1	1	1	1	1	1	1	1	1	1	1	1	1	1	1	1	1	1	1	1	1	1	1	1	1	1	1
OG0001739	HOG0001784	74	1	1	1	1	1	1	1	1	1	1	1	1	1	1	1	1	1	1	1	1	1	1	1	1	1	1	1	1	1	1	1	1	1	1	1	1	1	1	1	1	1	1	1	1	1	1	1
OG0001740	HOG0001785	74	1	1	1	1	1	1	1	1	1	1	1	1	1	1	1	1	1	1	1	1	1	1	1	1	1	1	1	1	1	1	1	1	1	1	1	1	1	1	1	1	1	1	1	1	1	1	1
OG0001741	HOG0001786	74	1	1	1	1	1	1	1	1	1	1	1	1	1	1	1	1	1	1	1	1	1	1	1	1	1	1	1	1	1	1	1	1	1	1	1	1	1	1	1	1	1	1	1	1	1	1	1
OG0001742	HOG0001787	74	1	1	1	1	1	1	1	1	1	1	1	1	1	1	1	1	1	1	1	1	1	1	1	1	1	1	1	1	1	1	1	1	1	1	1	1	1	1	1	1	1	1	1	1	1	1	1
OG0001743	HOG0001788	74	1	1	1	1	1	1	1	1	1	1	1	1	1	1	1	1	1	1	1	1	1	1	1	1	1	1	1	1	1	1	1	1	1	1	1	1	1	1	1	1	1	1	1	1	1	1	1
OG0001744	HOG0001789	74	1	1	1	1	1	1	1	1	1	1	1	1	1	1	1	1	1	1	1	1	1	1	1	1	1	1	1	1	1	1	1	1	1	1	1	1	1	1	1	1	1	1	1	1	1	1	1
OG0001745	HOG0001790	74	1	1	1	1	1	1	1	1	1	1	1	1	1	1	1	1	1	1	1	1	1	1	1	1	1	1	1	1	1	1	1	1	1	1	1	1	1	1	1	1	1	1	1	1	1	1	1
OG0001746	HOG0001791	74	1	1	1	1	1	1	1	1	1	1	1	1	1	1	1	1	1	1	1	1	1	1	1	1	1	1	1	1	1	1	1	1	1	1	1	1	1	1	1	1	1	1	1	1	1	1	1
OG0001747	HOG0001792	74	1	1	1	1	1	1	1	1	1	1	1	1	1	1	1	1	1	1	1	1	1	1	1	1	1	1	1	1	1	1	1	1	1	1	1	1	1	1	1	1	1	1	1	1	1	1	1
OG0001748	HOG0001793	74	1	1	1	1	1	1	1	1	1	1	1	1	1	1	1	1	1	1	1	1	1	1	1	1	1	1	1	1	1	1	1	1	1	1	1	1	1	1	1	1	1	1	1	1	1	1	1
OG0001749	HOG0001794	74	1	1	1	1	1	1	1	1	1	1	1	1	1	1	1	1	1	1	1	1	1	1	1	1	1	1	1	1	1	1	1	1	1	1	1	1	1	1	1	1	1	1	1	1	1	1	1
OG0001750	HOG0001795	74	1	1	1	1	1	1	1	1	1	1	1	1	1	1	1	1	1	1	1	1	1	1	1	1	1	1	1	1	1	1	1	1	1	1	1	1	1	1	1	1	1	1	1	1	1	1	1
OG0001751	HOG0001796	74	1	1	1	1	1	1	1	1	1	1	1	1	1	1	1	1	1	1	1	1	1	1	1	1	1	1	1	1	1	1	1	1	1	1	1	1	1	1	1	1	1	1	1	1	1	1	1
OG0001752	HOG0001797	74	1	1	1	1	1	1	1	1	1	1	1	1	1	1	1	1	1	1	1	1	1	1	1	1	1	1	1	1	1	1	1	1	1	1	1	1	1	1	1	1	1	1	1	1	1	1	1
OG0001753	HOG0001798	74	1	1	1	1	1	1	1	1	1	1	1	1	1	1	1	1	1	1	1	1	1	1	1	1	1	1	1	1	1	1	1	1	1	1	1	1	1	1	1	1	1	1	1	1	1	1	1
OG0001754	HOG0001799	74	1	1	1	1	1	1	1	1	1	1	1	1	1	1	1	1	1	1	1	1	1	1	1	1	1	1	1	1	1	1	1	1	1	1	1	1	1	1	1	1	1	1	1	1	1	1	1
OG0001755	HOG0001800	74	1	1	1	1	1	1	1	1	1	1	1	1	1	1	1	1	1	1	1	1	1	1	1	1	1	1	1	1	1	1	1	1	1	1	1	1	1	1	1	1	1	1	1	1	1	1	1
OG0001756	HOG0001801	3	1	1	0	0	0	0	0	0	0	0	0	0	0	0	0	0	1	0	0	0	0	0	0	0	0	0	0	0	0	0	0	0	0	0	0	0	0	0	0	0	0	0	0	0	0	0	0
OG0001756	HOG0001802	39	1	1	1	1	1	0	0	1	1	1	0	0	0	1	1	0	0	1	0	0	1	0	1	1	0	1	0	1	1	0	1	0	1	0	1	1	0	1	1	1	0	1	1	0	1	1	0
OG0001756	HOG0001803	32	1	1	1	0	1	0	0	1	0	1	0	0	0	1	0	0	0	1	0	1	0	1	0	0	1	1	0	1	1	0	1	0	1	0	0	1	0	0	1	0	0	1	1	0	1	1	0
OG0001757	HOG0001804	74	1	1	1	1	1	1	1	1	1	1	1	1	1	1	1	1	1	1	1	1	1	1	1	1	1	1	1	1	1	1	1	1	1	1	1	1	1	1	1	1	1	1	1	1	1	1	1
OG0001758	HOG0001805	74	1	1	1	1	1	1	1	1	1	1	1	1	1	1	1	1	1	1	1	1	1	1	1	1	1	1	1	1	1	1	1	1	1	1	1	1	1	1	1	1	1	1	1	1	1	1	1
OG0001759	HOG0001806	74	1	1	1	1	1	1	1	1	1	1	1	1	1	1	1	1	1	1	1	1	1	1	1	1	1	1	1	1	1	1	1	1	1	1	1	1	1	1	1	1	1	1	1	1	1	1	1
OG0001760	HOG0001807	74	1	1	1	1	1	1	1	1	1	1	1	1	1	1	1	1	1	1	1	1	1	1	1	1	1	1	1	1	1	1	1	1	1	1	1	1	1	1	1	1	1	1	1	1	1	1	1
OG0001761	HOG0001808	74	1	1	1	1	1	1	1	1	1	1	1	1	1	1	1	1	1	1	1	1	1	1	1	1	1	1	1	1	1	1	1	1	1	1	1	1	1	1	1	1	1	1	1	1	1	1	1
OG0001762	HOG0001809	74	1	1	1	1	1	1	1	1	1	1	1	1	1	1	1	1	1	1	1	1	1	1	1	1	1	1	1	1	1	1	1	1	1	1	1	1	1	1	1	1	1	1	1	1	1	1	1
OG0001763	HOG0001810	74	1	1	1	1	1	1	1	1	1	1	1	1	1	1	1	1	1	1	1	1	1	1	1	1	1	1	1	1	1	1	1	1	1	1	1	1	1	1	1	1	1	1	1	1	1	1	1
OG0001764	HOG0001811	74	1	1	1	1	1	1	1	1	1	1	1	1	1	1	1	1	1	1	1	1	1	1	1	1	1	1	1	1	1	1	1	1	1	1	1	1	1	1	1	1	1	1	1	1	1	1	1
OG0001765	HOG0001812	74	1	1	1	1	1	1	1	1	1	1	1	1	1	1	1	1	1	1	1	1	1	1	1	1	1	1	1	1	1	1	1	1	1	1	1	1	1	1	1	1	1	1	1	1	1	1	1
OG0001766	HOG0001813	74	1	1	1	1	1	1	1	1	1	1	1	1	1	1	1	1	1	1	1	1	1	1	1	1	1	1	1	1	1	1	1	1	1	1	1	1	1	1	1	1	1	1	1	1	1	1	1
OG0001767	HOG0001814	74	1	1	1	1	1	1	1	1	1	1	1	1	1	1	1	1	1	1	1	1	1	1	1	1	1	1	1	1	1	1	1	1	1	1	1	1	1	1	1	1	1	1	1	1	1	1	1
OG0001768	HOG0001815	74	1	1	1	1	1	1	1	1	1	1	1	1	1	1	1	1	1	1	1	1	1	1	1	1	1	1	1	1	1	1	1	1	1	1	1	1	1	1	1	1	1	1	1	1	1	1	1
OG0001769	HOG0001816	74	1	1	1	1	1	1	1	1	1	1	1	1	1	1	1	1	1	1	1	1	1	1	1	1	1	1	1	1	1	1	1	1	1	1	1	1	1	1	1	1	1	1	1	1	1	1	1
OG0001770	HOG0001817	74	1	1	1	1	1	1	1	1	1	1	1	1	1	1	1	1	1	1	1	1	1	1	1	1	1	1	1	1	1	1	1	1	1	1	1	1	1	1	1	1	1	1	1	1	1	1	1
OG0001771	HOG0001818	74	1	1	1	1	1	1	1	1	1	1	1	1	1	1	1	1	1	1	1	1	1	1	1	1	1	1	1	1	1	1	1	1	1	1	1	1	1	1	1	1	1	1	1	1	1	1	1
OG0001772	HOG0001819	74	1	1	1	1	1	1	1	1	1	1	1	1	1	1	1	1	1	1	1	1	1	1	1	1	1	1	1	1	1	1	1	1	1	1	1	1	1	1	1	1	1	1	1	1	1	1	1
OG0001773	HOG0001820	74	1	1	1	1	1	1	1	1	1	1	1	1	1	1	1	1	1	1	1	1	1	1	1	1	1	1	1	1	1	1	1	1	1	1	1	1	1	1	1	1	1	1	1	1	1	1	1
OG0001774	HOG0001821	74	1	1	1	1	1	1	1	1	1	1	1	1	1	1	1	1	1	1	1	1	1	1	1	1	1	1	1	1	1	1	1	1	1	1	1	1	1	1	1	1	1	1	1	1	1	1	1
OG0001775	HOG0001822	74	1	1	1	1	1	1	1	1	1	1	1	1	1	1	1	1	1	1	1	1	1	1	1	1	1	1	1	1	1	1	1	1	1	1	1	1	1	1	1	1	1	1	1	1	1	1	1
OG0001776	HOG0001823	74	1	1	1	1	1	1	1	1	1	1	1	1	1	1	1	1	1	1	1	1	1	1	1	1	1	1	1	1	1	1	1	1	1	1	1	1	1	1	1	1	1	1	1	1	1	1	1
OG0001777	HOG0001824	74	1	1	1	1	1	1	1	1	1	1	1	1	1	1	1	1	1	1	1	1	1	1	1	1	1	1	1	1	1	1	1	1	1	1	1	1	1	1	1	1	1	1	1	1	1	1	1
OG0001778	HOG0001825	74	1	1	1	1	1	1	1	1	1	1	1	1	1	1	1	1	1	1	1	1	1	1	1	1	1	1	1	1	1	1	1	1	1	1	1	1	1	1	1	1	1	1	1	1	1	1	1
OG0001779	HOG0001826	74	1	1	1	1	1	1	1	1	1	1	1	1	1	1	1	1	1	1	1	1	1	1	1	1	1	1	1	1	1	1	1	1	1	1	1	1	1	1	1	1	1	1	1	1	1	1	1
OG0001780	HOG0001827	74	1	1	1	1	1	1	1	1	1	1	1	1	1	1	1	1	1	1	1	1	1	1	1	1	1	1	1	1	1	1	1	1	1	1	1	1	1	1	1	1	1	1	1	1	1	1	1
OG0001781	HOG0001828	74	1	1	1	1	1	1	1	1	1	1	1	1	1	1	1	1	1	1	1	1	1	1	1	1	1	1	1	1	1	1	1	1	1	1	1	1	1	1	1	1	1	1	1	1	1	1	1
OG0001782	HOG0001829	74	1	1	1	1	1	1	1	1	1	1	1	1	1	1	1	1	1	1	1	1	1	1	1	1	1	1	1	1	1	1	1	1	1	1	1	1	1	1	1	1	1	1	1	1	1	1	1
OG0001783	HOG0001830	74	1	1	1	1	1	1	1	1	1	1	1	1	1	1	1	1	1	1	1	1	1	1	1	1	1	1	1	1	1	1	1	1	1	1	1	1	1	1	1	1	1	1	1	1	1	1	1
OG0001784	HOG0001831	74	1	1	1	1	1	1	1	1	1	1	1	1	1	1	1	1	1	1	1	1	1	1	1	1	1	1	1	1	1	1	1	1	1	1	1	1	1	1	1	1	1	1	1	1	1	1	1
OG0001785	HOG0001832	74	1	1	1	1	1	1	1	1	1	1	1	1	1	1	1	1	1	1	1	1	1	1	1	1	1	1	1	1	1	1	1	1	1	1	1	1	1	1	1	1	1	1	1	1	1	1	1
OG0001786	HOG0001833	74	1	1	1	1	1	1	1	1	1	1	1	1	1	1	1	1	1	1	1	1	1	1	1	1	1	1	1	1	1	1	1	1	1	1	1	1	1	1	1	1	1	1	1	1	1	1	1
OG0001787	HOG0001834	74	1	1	1	1	1	1	1	1	1	1	1	1	1	1	1	1	1	1	1	1	1	1	1	1	1	1	1	1	1	1	1	1	1	1	1	1	1	1	1	1	1	1	1	1	1	1	1
OG0001788	HOG0001835	74	1	1	1	1	1	1	1	1	1	1	1	1	1	1	1	1	1	1	1	1	1	1	1	1	1	1	1	1	1	1	1	1	1	1	1	1	1	1	1	1	1	1	1	1	1	1	1
OG0001789	HOG0001836	74	1	1	1	1	1	1	1	1	1	1	1	1	1	1	1	1	1	1	1	1	1	1	1	1	1	1	1	1	1	1	1	1	1	1	1	1	1	1	1	1	1	1	1	1	1	1	1
OG0001790	HOG0001837	74	1	1	1	1	1	1	1	1	1	1	1	1	1	1	1	1	1	1	1	1	1	1	1	1	1	1	1	1	1	1	1	1	1	1	1	1	1	1	1	1	1	1	1	1	1	1	1
OG0001791	HOG0001838	74	1	1	1	1	1	1	1	1	1	1	1	1	1	1	1	1	1	1	1	1	1	1	1	1	1	1	1	1	1	1	1	1	1	1	1	1	1	1	1	1	1	1	1	1	1	1	1
OG0001792	HOG0001839	74	1	1	1	1	1	1	1	1	1	1	1	1	1	1	1	1	1	1	1	1	1	1	1	1	1	1	1	1	1	1	1	1	1	1	1	1	1	1	1	1	1	1	1	1	1	1	1
OG0001793	HOG0001840	74	1	1	1	1	1	1	1	1	1	1	1	1	1	1	1	1	1	1	1	1	1	1	1	1	1	1	1	1	1	1	1	1	1	1	1	1	1	1	1	1	1	1	1	1	1	1	1
OG0001794	HOG0001841	74	1	1	1	1	1	1	1	1	1	1	1	1	1	1	1	1	1	1	1	1	1	1	1	1	1	1	1	1	1	1	1	1	1	1	1	1	1	1	1	1	1	1	1	1	1	1	1
OG0001795	HOG0001842	74	1	1	1	1	1	1	1	1	1	1	1	1	1	1	1	1	1	1	1	1	1	1	1	1	1	1	1	1	1	1	1	1	1	1	1	1	1	1	1	1	1	1	1	1	1	1	1
OG0001796	HOG0001843	74	1	1	1	1	1	1	1	1	1	1	1	1	1	1	1	1	1	1	1	1	1	1	1	1	1	1	1	1	1	1	1	1	1	1	1	1	1	1	1	1	1	1	1	1	1	1	1
OG0001797	HOG0001844	74	1	1	1	1	1	1	1	1	1	1	1	1	1	1	1	1	1	1	1	1	1	1	1	1	1	1	1	1	1	1	1	1	1	1	1	1	1	1	1	1	1	1	1	1	1	1	1
OG0001798	HOG0001845	74	1	1	1	1	1	1	1	1	1	1	1	1	1	1	1	1	1	1	1	1	1	1	1	1	1	1	1	1	1	1	1	1	1	1	1	1	1	1	1	1	1	1	1	1	1	1	1
OG0001799	HOG0001846	74	1	1	1	1	1	1	1	1	1	1	1	1	1	1	1	1	1	1	1	1	1	1	1	1	1	1	1	1	1	1	1	1	1	1	1	1	1	1	1	1	1	1	1	1	1	1	1
OG0001800	HOG0001847	74	1	1	1	1	1	1	1	1	1	1	1	1	1	1	1	1	1	1	1	1	1	1	1	1	1	1	1	1	1	1	1	1	1	1	1	1	1	1	1	1	1	1	1	1	1	1	1
OG0001801	HOG0001848	74	1	1	1	1	1	1	1	1	1	1	1	1	1	1	1	1	1	1	1	1	1	1	1	1	1	1	1	1	1	1	1	1	1	1	1	1	1	1	1	1	1	1	1	1	1	1	1
OG0001802	HOG0001849	74	1	1	1	1	1	1	1	1	1	1	1	1	1	1	1	1	1	1	1	1	1	1	1	1	1	1	1	1	1	1	1	1	1	1	1	1	1	1	1	1	1	1	1	1	1	1	1
OG0001803	HOG0001850	74	1	1	1	1	1	1	1	1	1	1	1	1	1	1	1	1	1	1	1	1	1	1	1	1	1	1	1	1	1	1	1	1	1	1	1	1	1	1	1	1	1	1	1	1	1	1	1
OG0001804	HOG0001851	74	1	1	1	1	1	1	1	1	1	1	1	1	1	1	1	1	1	1	1	1	1	1	1	1	1	1	1	1	1	1	1	1	1	1	1	1	1	1	1	1	1	1	1	1	1	1	1
OG0001805	HOG0001852	74	1	1	1	1	1	1	1	1	1	1	1	1	1	1	1	1	1	1	1	1	1	1	1	1	1	1	1	1	1	1	1	1	1	1	1	1	1	1	1	1	1	1	1	1	1	1	1
OG0001806	HOG0001853	74	1	1	1	1	1	1	1	1	1	1	1	1	1	1	1	1	1	1	1	1	1	1	1	1	1	1	1	1	1	1	1	1	1	1	1	1	1	1	1	1	1	1	1	1	1	1	1
OG0001807	HOG0001854	74	1	1	1	1	1	1	1	1	1	1	1	1	1	1	1	1	1	1	1	1	1	1	1	1	1	1	1	1	1	1	1	1	1	1	1	1	1	1	1	1	1	1	1	1	1	1	1
OG0001808	HOG0001855	74	1	1	1	1	1	1	1	1	1	1	1	1	1	1	1	1	1	1	1	1	1	1	1	1	1	1	1	1	1	1	1	1	1	1	1	1	1	1	1	1	1	1	1	1	1	1	1
OG0001809	HOG0001856	74	1	1	1	1	1	1	1	1	1	1	1	1	1	1	1	1	1	1	1	1	1	1	1	1	1	1	1	1	1	1	1	1	1	1	1	1	1	1	1	1	1	1	1	1	1	1	1
OG0001810	HOG0001857	74	1	1	1	1	1	1	1	1	1	1	1	1	1	1	1	1	1	1	1	1	1	1	1	1	1	1	1	1	1	1	1	1	1	1	1	1	1	1	1	1	1	1	1	1	1	1	1
OG0001811	HOG0001858	74	1	1	1	1	1	1	1	1	1	1	1	1	1	1	1	1	1	1	1	1	1	1	1	1	1	1	1	1	1	1	1	1	1	1	1	1	1	1	1	1	1	1	1	1	1	1	1
OG0001812	HOG0001859	74	1	1	1	1	1	1	1	1	1	1	1	1	1	1	1	1	1	1	1	1	1	1	1	1	1	1	1	1	1	1	1	1	1	1	1	1	1	1	1	1	1	1	1	1	1	1	1
OG0001813	HOG0001860	74	1	1	1	1	1	1	1	1	1	1	1	1	1	1	1	1	1	1	1	1	1	1	1	1	1	1	1	1	1	1	1	1	1	1	1	1	1	1	1	1	1	1	1	1	1	1	1
OG0001814	HOG0001861	74	1	1	1	1	1	1	1	1	1	1	1	1	1	1	1	1	1	1	1	1	1	1	1	1	1	1	1	1	1	1	1	1	1	1	1	1	1	1	1	1	1	1	1	1	1	1	1
OG0001815	HOG0001862	74	1	1	1	1	1	1	1	1	1	1	1	1	1	1	1	1	1	1	1	1	1	1	1	1	1	1	1	1	1	1	1	1	1	1	1	1	1	1	1	1	1	1	1	1	1	1	1
OG0001816	HOG0001863	74	1	1	1	1	1	1	1	1	1	1	1	1	1	1	1	1	1	1	1	1	1	1	1	1	1	1	1	1	1	1	1	1	1	1	1	1	1	1	1	1	1	1	1	1	1	1	1
OG0001817	HOG0001864	74	1	1	1	1	1	1	1	1	1	1	1	1	1	1	1	1	1	1	1	1	1	1	1	1	1	1	1	1	1	1	1	1	1	1	1	1	1	1	1	1	1	1	1	1	1	1	1
OG0001818	HOG0001865	74	1	1	1	1	1	1	1	1	1	1	1	1	1	1	1	1	1	1	1	1	1	1	1	1	1	1	1	1	1	1	1	1	1	1	1	1	1	1	1	1	1	1	1	1	1	1	1
OG0001819	HOG0001866	74	1	1	1	1	1	1	1	1	1	1	1	1	1	1	1	1	1	1	1	1	1	1	1	1	1	1	1	1	1	1	1	1	1	1	1	1	1	1	1	1	1	1	1	1	1	1	1
OG0001820	HOG0001867	74	1	1	1	1	1	1	1	1	1	1	1	1	1	1	1	1	1	1	1	1	1	1	1	1	1	1	1	1	1	1	1	1	1	1	1	1	1	1	1	1	1	1	1	1	1	1	1
OG0001821	HOG0001868	74	1	1	1	1	1	1	1	1	1	1	1	1	1	1	1	1	1	1	1	1	1	1	1	1	1	1	1	1	1	1	1	1	1	1	1	1	1	1	1	1	1	1	1	1	1	1	1
OG0001822	HOG0001869	74	1	1	1	1	1	1	1	1	1	1	1	1	1	1	1	1	1	1	1	1	1	1	1	1	1	1	1	1	1	1	1	1	1	1	1	1	1	1	1	1	1	1	1	1	1	1	1
OG0001823	HOG0001870	74	1	1	1	1	1	1	1	1	1	1	1	1	1	1	1	1	1	1	1	1	1	1	1	1	1	1	1	1	1	1	1	1	1	1	1	1	1	1	1	1	1	1	1	1	1	1	1
OG0001824	HOG0001871	74	1	1	1	1	1	1	1	1	1	1	1	1	1	1	1	1	1	1	1	1	1	1	1	1	1	1	1	1	1	1	1	1	1	1	1	1	1	1	1	1	1	1	1	1	1	1	1
OG0001825	HOG0001872	74	1	1	1	1	1	1	1	1	1	1	1	1	1	1	1	1	1	1	1	1	1	1	1	1	1	1	1	1	1	1	1	1	1	1	1	1	1	1	1	1	1	1	1	1	1	1	1
OG0001826	HOG0001873	74	1	1	1	1	1	1	1	1	1	1	1	1	1	1	1	1	1	1	1	1	1	1	1	1	1	1	1	1	1	1	1	1	1	1	1	1	1	1	1	1	1	1	1	1	1	1	1
OG0001827	HOG0001874	74	1	1	1	1	1	1	1	1	1	1	1	1	1	1	1	1	1	1	1	1	1	1	1	1	1	1	1	1	1	1	1	1	1	1	1	1	1	1	1	1	1	1	1	1	1	1	1
OG0001828	HOG0001875	74	1	1	1	1	1	1	1	1	1	1	1	1	1	1	1	1	1	1	1	1	1	1	1	1	1	1	1	1	1	1	1	1	1	1	1	1	1	1	1	1	1	1	1	1	1	1	1
OG0001829	HOG0001876	74	1	1	1	1	1	1	1	1	1	1	1	1	1	1	1	1	1	1	1	1	1	1	1	1	1	1	1	1	1	1	1	1	1	1	1	1	1	1	1	1	1	1	1	1	1	1	1
OG0001830	HOG0001877	74	1	1	1	1	1	1	1	1	1	1	1	1	1	1	1	1	1	1	1	1	1	1	1	1	1	1	1	1	1	1	1	1	1	1	1	1	1	1	1	1	1	1	1	1	1	1	1
OG0001831	HOG0001878	74	1	1	1	1	1	1	1	1	1	1	1	1	1	1	1	1	1	1	1	1	1	1	1	1	1	1	1	1	1	1	1	1	1	1	1	1	1	1	1	1	1	1	1	1	1	1	1
OG0001832	HOG0001879	74	1	1	1	1	1	1	1	1	1	1	1	1	1	1	1	1	1	1	1	1	1	1	1	1	1	1	1	1	1	1	1	1	1	1	1	1	1	1	1	1	1	1	1	1	1	1	1
OG0001833	HOG0001880	74	1	1	1	1	1	1	1	1	1	1	1	1	1	1	1	1	1	1	1	1	1	1	1	1	1	1	1	1	1	1	1	1	1	1	1	1	1	1	1	1	1	1	1	1	1	1	1
OG0001834	HOG0001881	74	1	1	1	1	1	1	1	1	1	1	1	1	1	1	1	1	1	1	1	1	1	1	1	1	1	1	1	1	1	1	1	1	1	1	1	1	1	1	1	1	1	1	1	1	1	1	1
OG0001835	HOG0001882	74	1	1	1	1	1	1	1	1	1	1	1	1	1	1	1	1	1	1	1	1	1	1	1	1	1	1	1	1	1	1	1	1	1	1	1	1	1	1	1	1	1	1	1	1	1	1	1
OG0001836	HOG0001883	74	1	1	1	1	1	1	1	1	1	1	1	1	1	1	1	1	1	1	1	1	1	1	1	1	1	1	1	1	1	1	1	1	1	1	1	1	1	1	1	1	1	1	1	1	1	1	1
OG0001837	HOG0001884	74	1	1	1	1	1	1	1	1	1	1	1	1	1	1	1	1	1	1	1	1	1	1	1	1	1	1	1	1	1	1	1	1	1	1	1	1	1	1	1	1	1	1	1	1	1	1	1
OG0001838	HOG0001885	74	1	1	1	1	1	1	1	1	1	1	1	1	1	1	1	1	1	1	1	1	1	1	1	1	1	1	1	1	1	1	1	1	1	1	1	1	1	1	1	1	1	1	1	1	1	1	1
OG0001839	HOG0001886	74	1	1	1	1	1	1	1	1	1	1	1	1	1	1	1	1	1	1	1	1	1	1	1	1	1	1	1	1	1	1	1	1	1	1	1	1	1	1	1	1	1	1	1	1	1	1	1
OG0001840	HOG0001887	74	1	1	1	1	1	1	1	1	1	1	1	1	1	1	1	1	1	1	1	1	1	1	1	1	1	1	1	1	1	1	1	1	1	1	1	1	1	1	1	1	1	1	1	1	1	1	1
OG0001841	HOG0001888	74	1	1	1	1	1	1	1	1	1	1	1	1	1	1	1	1	1	1	1	1	1	1	1	1	1	1	1	1	1	1	1	1	1	1	1	1	1	1	1	1	1	1	1	1	1	1	1
OG0001842	HOG0001889	74	1	1	1	1	1	1	1	1	1	1	1	1	1	1	1	1	1	1	1	1	1	1	1	1	1	1	1	1	1	1	1	1	1	1	1	1	1	1	1	1	1	1	1	1	1	1	1
OG0001843	HOG0001890	74	1	1	1	1	1	1	1	1	1	1	1	1	1	1	1	1	1	1	1	1	1	1	1	1	1	1	1	1	1	1	1	1	1	1	1	1	1	1	1	1	1	1	1	1	1	1	1
OG0001844	HOG0001891	74	1	1	1	1	1	1	1	1	1	1	1	1	1	1	1	1	1	1	1	1	1	1	1	1	1	1	1	1	1	1	1	1	1	1	1	1	1	1	1	1	1	1	1	1	1	1	1
OG0001845	HOG0001892	74	1	1	1	1	1	1	1	1	1	1	1	1	1	1	1	1	1	1	1	1	1	1	1	1	1	1	1	1	1	1	1	1	1	1	1	1	1	1	1	1	1	1	1	1	1	1	1
OG0001846	HOG0001893	74	1	1	1	1	1	1	1	1	1	1	1	1	1	1	1	1	1	1	1	1	1	1	1	1	1	1	1	1	1	1	1	1	1	1	1	1	1	1	1	1	1	1	1	1	1	1	1
OG0001847	HOG0001894	74	1	1	1	1	1	1	1	1	1	1	1	1	1	1	1	1	1	1	1	1	1	1	1	1	1	1	1	1	1	1	1	1	1	1	1	1	1	1	1	1	1	1	1	1	1	1	1
OG0001848	HOG0001895	74	1	1	1	1	1	1	1	1	1	1	1	1	1	1	1	1	1	1	1	1	1	1	1	1	1	1	1	1	1	1	1	1	1	1	1	1	1	1	1	1	1	1	1	1	1	1	1
OG0001849	HOG0001896	74	1	1	1	1	1	1	1	1	1	1	1	1	1	1	1	1	1	1	1	1	1	1	1	1	1	1	1	1	1	1	1	1	1	1	1	1	1	1	1	1	1	1	1	1	1	1	1
OG0001850	HOG0001897	74	1	1	1	1	1	1	1	1	1	1	1	1	1	1	1	1	1	1	1	1	1	1	1	1	1	1	1	1	1	1	1	1	1	1	1	1	1	1	1	1	1	1	1	1	1	1	1
OG0001851	HOG0001898	74	1	1	1	1	1	1	1	1	1	1	1	1	1	1	1	1	1	1	1	1	1	1	1	1	1	1	1	1	1	1	1	1	1	1	1	1	1	1	1	1	1	1	1	1	1	1	1
OG0001852	HOG0001899	74	1	1	1	1	1	1	1	1	1	1	1	1	1	1	1	1	1	1	1	1	1	1	1	1	1	1	1	1	1	1	1	1	1	1	1	1	1	1	1	1	1	1	1	1	1	1	1
OG0001853	HOG0001900	74	1	1	1	1	1	1	1	1	1	1	1	1	1	1	1	1	1	1	1	1	1	1	1	1	1	1	1	1	1	1	1	1	1	1	1	1	1	1	1	1	1	1	1	1	1	1	1
OG0001854	HOG0001901	74	1	1	1	1	1	1	1	1	1	1	1	1	1	1	1	1	1	1	1	1	1	1	1	1	1	1	1	1	1	1	1	1	1	1	1	1	1	1	1	1	1	1	1	1	1	1	1
OG0001855	HOG0001902	74	1	1	1	1	1	1	1	1	1	1	1	1	1	1	1	1	1	1	1	1	1	1	1	1	1	1	1	1	1	1	1	1	1	1	1	1	1	1	1	1	1	1	1	1	1	1	1
OG0001856	HOG0001903	74	1	1	1	1	1	1	1	1	1	1	1	1	1	1	1	1	1	1	1	1	1	1	1	1	1	1	1	1	1	1	1	1	1	1	1	1	1	1	1	1	1	1	1	1	1	1	1
OG0001857	HOG0001904	74	1	1	1	1	1	1	1	1	1	1	1	1	1	1	1	1	1	1	1	1	1	1	1	1	1	1	1	1	1	1	1	1	1	1	1	1	1	1	1	1	1	1	1	1	1	1	1
OG0001858	HOG0001905	74	1	1	1	1	1	1	1	1	1	1	1	1	1	1	1	1	1	1	1	1	1	1	1	1	1	1	1	1	1	1	1	1	1	1	1	1	1	1	1	1	1	1	1	1	1	1	1
OG0001859	HOG0001906	74	1	1	1	1	1	1	1	1	1	1	1	1	1	1	1	1	1	1	1	1	1	1	1	1	1	1	1	1	1	1	1	1	1	1	1	1	1	1	1	1	1	1	1	1	1	1	1
OG0001860	HOG0001907	74	1	1	1	1	1	1	1	1	1	1	1	1	1	1	1	1	1	1	1	1	1	1	1	1	1	1	1	1	1	1	1	1	1	1	1	1	1	1	1	1	1	1	1	1	1	1	1
OG0001861	HOG0001908	74	1	1	1	1	1	1	1	1	1	1	1	1	1	1	1	1	1	1	1	1	1	1	1	1	1	1	1	1	1	1	1	1	1	1	1	1	1	1	1	1	1	1	1	1	1	1	1
OG0001862	HOG0001909	74	1	1	1	1	1	1	1	1	1	1	1	1	1	1	1	1	1	1	1	1	1	1	1	1	1	1	1	1	1	1	1	1	1	1	1	1	1	1	1	1	1	1	1	1	1	1	1
OG0001863	HOG0001910	74	1	1	1	1	1	1	1	1	1	1	1	1	1	1	1	1	1	1	1	1	1	1	1	1	1	1	1	1	1	1	1	1	1	1	1	1	1	1	1	1	1	1	1	1	1	1	1
OG0001864	HOG0001911	74	1	1	1	1	1	1	1	1	1	1	1	1	1	1	1	1	1	1	1	1	1	1	1	1	1	1	1	1	1	1	1	1	1	1	1	1	1	1	1	1	1	1	1	1	1	1	1
OG0001865	HOG0001912	74	1	1	1	1	1	1	1	1	1	1	1	1	1	1	1	1	1	1	1	1	1	1	1	1	1	1	1	1	1	1	1	1	1	1	1	1	1	1	1	1	1	1	1	1	1	1	1
OG0001866	HOG0001913	74	1	1	1	1	1	1	1	1	1	1	1	1	1	1	1	1	1	1	1	1	1	1	1	1	1	1	1	1	1	1	1	1	1	1	1	1	1	1	1	1	1	1	1	1	1	1	1
OG0001867	HOG0001914	74	1	1	1	1	1	1	1	1	1	1	1	1	1	1	1	1	1	1	1	1	1	1	1	1	1	1	1	1	1	1	1	1	1	1	1	1	1	1	1	1	1	1	1	1	1	1	1
OG0001868	HOG0001915	74	1	1	1	1	1	1	1	1	1	1	1	1	1	1	1	1	1	1	1	1	1	1	1	1	1	1	1	1	1	1	1	1	1	1	1	1	1	1	1	1	1	1	1	1	1	1	1
OG0001869	HOG0001916	74	1	1	1	1	1	1	1	1	1	1	1	1	1	1	1	1	1	1	1	1	1	1	1	1	1	1	1	1	1	1	1	1	1	1	1	1	1	1	1	1	1	1	1	1	1	1	1
OG0001870	HOG0001917	74	1	1	1	1	1	1	1	1	1	1	1	1	1	1	1	1	1	1	1	1	1	1	1	1	1	1	1	1	1	1	1	1	1	1	1	1	1	1	1	1	1	1	1	1	1	1	1
OG0001871	HOG0001918	74	1	1	1	1	1	1	1	1	1	1	1	1	1	1	1	1	1	1	1	1	1	1	1	1	1	1	1	1	1	1	1	1	1	1	1	1	1	1	1	1	1	1	1	1	1	1	1
OG0001872	HOG0001919	74	1	1	1	1	1	1	1	1	1	1	1	1	1	1	1	1	1	1	1	1	1	1	1	1	1	1	1	1	1	1	1	1	1	1	1	1	1	1	1	1	1	1	1	1	1	1	1
OG0001873	HOG0001920	74	1	1	1	1	1	1	1	1	1	1	1	1	1	1	1	1	1	1	1	1	1	1	1	1	1	1	1	1	1	1	1	1	1	1	1	1	1	1	1	1	1	1	1	1	1	1	1
OG0001874	HOG0001921	74	1	1	1	1	1	1	1	1	1	1	1	1	1	1	1	1	1	1	1	1	1	1	1	1	1	1	1	1	1	1	1	1	1	1	1	1	1	1	1	1	1	1	1	1	1	1	1
OG0001875	HOG0001922	74	1	1	1	1	1	1	1	1	1	1	1	1	1	1	1	1	1	1	1	1	1	1	1	1	1	1	1	1	1	1	1	1	1	1	1	1	1	1	1	1	1	1	1	1	1	1	1
OG0001876	HOG0001923	74	1	1	1	1	1	1	1	1	1	1	1	1	1	1	1	1	1	1	1	1	1	1	1	1	1	1	1	1	1	1	1	1	1	1	1	1	1	1	1	1	1	1	1	1	1	1	1
OG0001877	HOG0001924	74	1	1	1	1	1	1	1	1	1	1	1	1	1	1	1	1	1	1	1	1	1	1	1	1	1	1	1	1	1	1	1	1	1	1	1	1	1	1	1	1	1	1	1	1	1	1	1
OG0001878	HOG0001925	74	1	1	1	1	1	1	1	1	1	1	1	1	1	1	1	1	1	1	1	1	1	1	1	1	1	1	1	1	1	1	1	1	1	1	1	1	1	1	1	1	1	1	1	1	1	1	1
OG0001879	HOG0001926	74	1	1	1	1	1	1	1	1	1	1	1	1	1	1	1	1	1	1	1	1	1	1	1	1	1	1	1	1	1	1	1	1	1	1	1	1	1	1	1	1	1	1	1	1	1	1	1
OG0001880	HOG0001927	74	1	1	1	1	1	1	1	1	1	1	1	1	1	1	1	1	1	1	1	1	1	1	1	1	1	1	1	1	1	1	1	1	1	1	1	1	1	1	1	1	1	1	1	1	1	1	1
OG0001881	HOG0001928	74	1	1	1	1	1	1	1	1	1	1	1	1	1	1	1	1	1	1	1	1	1	1	1	1	1	1	1	1	1	1	1	1	1	1	1	1	1	1	1	1	1	1	1	1	1	1	1
OG0001882	HOG0001929	74	1	1	1	1	1	1	1	1	1	1	1	1	1	1	1	1	1	1	1	1	1	1	1	1	1	1	1	1	1	1	1	1	1	1	1	1	1	1	1	1	1	1	1	1	1	1	1
OG0001883	HOG0001930	74	1	1	1	1	1	1	1	1	1	1	1	1	1	1	1	1	1	1	1	1	1	1	1	1	1	1	1	1	1	1	1	1	1	1	1	1	1	1	1	1	1	1	1	1	1	1	1
OG0001884	HOG0001931	74	1	1	1	1	1	1	1	1	1	1	1	1	1	1	1	1	1	1	1	1	1	1	1	1	1	1	1	1	1	1	1	1	1	1	1	1	1	1	1	1	1	1	1	1	1	1	1
OG0001885	HOG0001932	74	1	1	1	1	1	1	1	1	1	1	1	1	1	1	1	1	1	1	1	1	1	1	1	1	1	1	1	1	1	1	1	1	1	1	1	1	1	1	1	1	1	1	1	1	1	1	1
OG0001886	HOG0001933	74	1	1	1	1	1	1	1	1	1	1	1	1	1	1	1	1	1	1	1	1	1	1	1	1	1	1	1	1	1	1	1	1	1	1	1	1	1	1	1	1	1	1	1	1	1	1	1
OG0001887	HOG0001934	74	1	1	1	1	1	1	1	1	1	1	1	1	1	1	1	1	1	1	1	1	1	1	1	1	1	1	1	1	1	1	1	1	1	1	1	1	1	1	1	1	1	1	1	1	1	1	1
OG0001888	HOG0001935	74	1	1	1	1	1	1	1	1	1	1	1	1	1	1	1	1	1	1	1	1	1	1	1	1	1	1	1	1	1	1	1	1	1	1	1	1	1	1	1	1	1	1	1	1	1	1	1
OG0001889	HOG0001936	74	1	1	1	1	1	1	1	1	1	1	1	1	1	1	1	1	1	1	1	1	1	1	1	1	1	1	1	1	1	1	1	1	1	1	1	1	1	1	1	1	1	1	1	1	1	1	1
OG0001890	HOG0001937	74	1	1	1	1	1	1	1	1	1	1	1	1	1	1	1	1	1	1	1	1	1	1	1	1	1	1	1	1	1	1	1	1	1	1	1	1	1	1	1	1	1	1	1	1	1	1	1
OG0001891	HOG0001938	74	1	1	1	1	1	1	1	1	1	1	1	1	1	1	1	1	1	1	1	1	1	1	1	1	1	1	1	1	1	1	1	1	1	1	1	1	1	1	1	1	1	1	1	1	1	1	1
OG0001892	HOG0001939	74	1	1	1	1	1	1	1	1	1	1	1	1	1	1	1	1	1	1	1	1	1	1	1	1	1	1	1	1	1	1	1	1	1	1	1	1	1	1	1	1	1	1	1	1	1	1	1
OG0001893	HOG0001940	74	1	1	1	1	1	1	1	1	1	1	1	1	1	1	1	1	1	1	1	1	1	1	1	1	1	1	1	1	1	1	1	1	1	1	1	1	1	1	1	1	1	1	1	1	1	1	1
OG0001894	HOG0001941	74	1	1	1	1	1	1	1	1	1	1	1	1	1	1	1	1	1	1	1	1	1	1	1	1	1	1	1	1	1	1	1	1	1	1	1	1	1	1	1	1	1	1	1	1	1	1	1
OG0001895	HOG0001942	74	1	1	1	1	1	1	1	1	1	1	1	1	1	1	1	1	1	1	1	1	1	1	1	1	1	1	1	1	1	1	1	1	1	1	1	1	1	1	1	1	1	1	1	1	1	1	1
OG0001896	HOG0001943	74	1	1	1	1	1	1	1	1	1	1	1	1	1	1	1	1	1	1	1	1	1	1	1	1	1	1	1	1	1	1	1	1	1	1	1	1	1	1	1	1	1	1	1	1	1	1	1
OG0001897	HOG0001944	74	1	1	1	1	1	1	1	1	1	1	1	1	1	1	1	1	1	1	1	1	1	1	1	1	1	1	1	1	1	1	1	1	1	1	1	1	1	1	1	1	1	1	1	1	1	1	1
OG0001898	HOG0001945	74	1	1	1	1	1	1	1	1	1	1	1	1	1	1	1	1	1	1	1	1	1	1	1	1	1	1	1	1	1	1	1	1	1	1	1	1	1	1	1	1	1	1	1	1	1	1	1
OG0001899	HOG0001946	74	1	1	1	1	1	1	1	1	1	1	1	1	1	1	1	1	1	1	1	1	1	1	1	1	1	1	1	1	1	1	1	1	1	1	1	1	1	1	1	1	1	1	1	1	1	1	1
OG0001900	HOG0001947	74	1	1	1	1	1	1	1	1	1	1	1	1	1	1	1	1	1	1	1	1	1	1	1	1	1	1	1	1	1	1	1	1	1	1	1	1	1	1	1	1	1	1	1	1	1	1	1
OG0001901	HOG0001948	74	1	1	1	1	1	1	1	1	1	1	1	1	1	1	1	1	1	1	1	1	1	1	1	1	1	1	1	1	1	1	1	1	1	1	1	1	1	1	1	1	1	1	1	1	1	1	1
OG0001902	HOG0001949	74	1	1	1	1	1	1	1	1	1	1	1	1	1	1	1	1	1	1	1	1	1	1	1	1	1	1	1	1	1	1	1	1	1	1	1	1	1	1	1	1	1	1	1	1	1	1	1
OG0001903	HOG0001950	74	1	1	1	1	1	1	1	1	1	1	1	1	1	1	1	1	1	1	1	1	1	1	1	1	1	1	1	1	1	1	1	1	1	1	1	1	1	1	1	1	1	1	1	1	1	1	1
OG0001904	HOG0001951	74	1	1	1	1	1	1	1	1	1	1	1	1	1	1	1	1	1	1	1	1	1	1	1	1	1	1	1	1	1	1	1	1	1	1	1	1	1	1	1	1	1	1	1	1	1	1	1
OG0001905	HOG0001952	74	1	1	1	1	1	1	1	1	1	1	1	1	1	1	1	1	1	1	1	1	1	1	1	1	1	1	1	1	1	1	1	1	1	1	1	1	1	1	1	1	1	1	1	1	1	1	1
OG0001906	HOG0001953	74	1	1	1	1	1	1	1	1	1	1	1	1	1	1	1	1	1	1	1	1	1	1	1	1	1	1	1	1	1	1	1	1	1	1	1	1	1	1	1	1	1	1	1	1	1	1	1
OG0001907	HOG0001954	74	1	1	1	1	1	1	1	1	1	1	1	1	1	1	1	1	1	1	1	1	1	1	1	1	1	1	1	1	1	1	1	1	1	1	1	1	1	1	1	1	1	1	1	1	1	1	1
OG0001908	HOG0001955	74	1	1	1	1	1	1	1	1	1	1	1	1	1	1	1	1	1	1	1	1	1	1	1	1	1	1	1	1	1	1	1	1	1	1	1	1	1	1	1	1	1	1	1	1	1	1	1
OG0001909	HOG0001956	74	1	1	1	1	1	1	1	1	1	1	1	1	1	1	1	1	1	1	1	1	1	1	1	1	1	1	1	1	1	1	1	1	1	1	1	1	1	1	1	1	1	1	1	1	1	1	1
OG0001910	HOG0001957	74	1	1	1	1	1	1	1	1	1	1	1	1	1	1	1	1	1	1	1	1	1	1	1	1	1	1	1	1	1	1	1	1	1	1	1	1	1	1	1	1	1	1	1	1	1	1	1
OG0001911	HOG0001958	74	1	1	1	1	1	1	1	1	1	1	1	1	1	1	1	1	1	1	1	1	1	1	1	1	1	1	1	1	1	1	1	1	1	1	1	1	1	1	1	1	1	1	1	1	1	1	1
OG0001912	HOG0001959	74	1	1	1	1	1	1	1	1	1	1	1	1	1	1	1	1	1	1	1	1	1	1	1	1	1	1	1	1	1	1	1	1	1	1	1	1	1	1	1	1	1	1	1	1	1	1	1
OG0001913	HOG0001960	74	1	1	1	1	1	1	1	1	1	1	1	1	1	1	1	1	1	1	1	1	1	1	1	1	1	1	1	1	1	1	1	1	1	1	1	1	1	1	1	1	1	1	1	1	1	1	1
OG0001914	HOG0001961	74	1	1	1	1	1	1	1	1	1	1	1	1	1	1	1	1	1	1	1	1	1	1	1	1	1	1	1	1	1	1	1	1	1	1	1	1	1	1	1	1	1	1	1	1	1	1	1
OG0001915	HOG0001962	74	1	1	1	1	1	1	1	1	1	1	1	1	1	1	1	1	1	1	1	1	1	1	1	1	1	1	1	1	1	1	1	1	1	1	1	1	1	1	1	1	1	1	1	1	1	1	1
OG0001916	HOG0001963	74	1	1	1	1	1	1	1	1	1	1	1	1	1	1	1	1	1	1	1	1	1	1	1	1	1	1	1	1	1	1	1	1	1	1	1	1	1	1	1	1	1	1	1	1	1	1	1
OG0001917	HOG0001964	74	1	1	1	1	1	1	1	1	1	1	1	1	1	1	1	1	1	1	1	1	1	1	1	1	1	1	1	1	1	1	1	1	1	1	1	1	1	1	1	1	1	1	1	1	1	1	1
OG0001918	HOG0001965	74	1	1	1	1	1	1	1	1	1	1	1	1	1	1	1	1	1	1	1	1	1	1	1	1	1	1	1	1	1	1	1	1	1	1	1	1	1	1	1	1	1	1	1	1	1	1	1
OG0001919	HOG0001966	74	1	1	1	1	1	1	1	1	1	1	1	1	1	1	1	1	1	1	1	1	1	1	1	1	1	1	1	1	1	1	1	1	1	1	1	1	1	1	1	1	1	1	1	1	1	1	1
OG0001920	HOG0001967	74	1	1	1	1	1	1	1	1	1	1	1	1	1	1	1	1	1	1	1	1	1	1	1	1	1	1	1	1	1	1	1	1	1	1	1	1	1	1	1	1	1	1	1	1	1	1	1
OG0001921	HOG0001968	74	1	1	1	1	1	1	1	1	1	1	1	1	1	1	1	1	1	1	1	1	1	1	1	1	1	1	1	1	1	1	1	1	1	1	1	1	1	1	1	1	1	1	1	1	1	1	1
OG0001922	HOG0001969	74	1	1	1	1	1	1	1	1	1	1	1	1	1	1	1	1	1	1	1	1	1	1	1	1	1	1	1	1	1	1	1	1	1	1	1	1	1	1	1	1	1	1	1	1	1	1	1
OG0001923	HOG0001970	74	1	1	1	1	1	1	1	1	1	1	1	1	1	1	1	1	1	1	1	1	1	1	1	1	1	1	1	1	1	1	1	1	1	1	1	1	1	1	1	1	1	1	1	1	1	1	1
OG0001924	HOG0001971	74	1	1	1	1	1	1	1	1	1	1	1	1	1	1	1	1	1	1	1	1	1	1	1	1	1	1	1	1	1	1	1	1	1	1	1	1	1	1	1	1	1	1	1	1	1	1	1
OG0001925	HOG0001972	74	1	1	1	1	1	1	1	1	1	1	1	1	1	1	1	1	1	1	1	1	1	1	1	1	1	1	1	1	1	1	1	1	1	1	1	1	1	1	1	1	1	1	1	1	1	1	1
OG0001926	HOG0001973	74	1	1	1	1	1	1	1	1	1	1	1	1	1	1	1	1	1	1	1	1	1	1	1	1	1	1	1	1	1	1	1	1	1	1	1	1	1	1	1	1	1	1	1	1	1	1	1
OG0001927	HOG0001974	74	1	1	1	1	1	1	1	1	1	1	1	1	1	1	1	1	1	1	1	1	1	1	1	1	1	1	1	1	1	1	1	1	1	1	1	1	1	1	1	1	1	1	1	1	1	1	1
OG0001928	HOG0001975	74	1	1	1	1	1	1	1	1	1	1	1	1	1	1	1	1	1	1	1	1	1	1	1	1	1	1	1	1	1	1	1	1	1	1	1	1	1	1	1	1	1	1	1	1	1	1	1
OG0001929	HOG0001976	74	1	1	1	1	1	1	1	1	1	1	1	1	1	1	1	1	1	1	1	1	1	1	1	1	1	1	1	1	1	1	1	1	1	1	1	1	1	1	1	1	1	1	1	1	1	1	1
OG0001930	HOG0001977	74	1	1	1	1	1	1	1	1	1	1	1	1	1	1	1	1	1	1	1	1	1	1	1	1	1	1	1	1	1	1	1	1	1	1	1	1	1	1	1	1	1	1	1	1	1	1	1
OG0001931	HOG0001978	74	1	1	1	1	1	1	1	1	1	1	1	1	1	1	1	1	1	1	1	1	1	1	1	1	1	1	1	1	1	1	1	1	1	1	1	1	1	1	1	1	1	1	1	1	1	1	1
OG0001932	HOG0001979	74	1	1	1	1	1	1	1	1	1	1	1	1	1	1	1	1	1	1	1	1	1	1	1	1	1	1	1	1	1	1	1	1	1	1	1	1	1	1	1	1	1	1	1	1	1	1	1
OG0001933	HOG0001980	74	1	1	1	1	1	1	1	1	1	1	1	1	1	1	1	1	1	1	1	1	1	1	1	1	1	1	1	1	1	1	1	1	1	1	1	1	1	1	1	1	1	1	1	1	1	1	1
OG0001934	HOG0001981	74	1	1	1	1	1	1	1	1	1	1	1	1	1	1	1	1	1	1	1	1	1	1	1	1	1	1	1	1	1	1	1	1	1	1	1	1	1	1	1	1	1	1	1	1	1	1	1
OG0001935	HOG0001982	74	1	1	1	1	1	1	1	1	1	1	1	1	1	1	1	1	1	1	1	1	1	1	1	1	1	1	1	1	1	1	1	1	1	1	1	1	1	1	1	1	1	1	1	1	1	1	1
OG0001936	HOG0001983	74	1	1	1	1	1	1	1	1	1	1	1	1	1	1	1	1	1	1	1	1	1	1	1	1	1	1	1	1	1	1	1	1	1	1	1	1	1	1	1	1	1	1	1	1	1	1	1
OG0001937	HOG0001984	74	1	1	1	1	1	1	1	1	1	1	1	1	1	1	1	1	1	1	1	1	1	1	1	1	1	1	1	1	1	1	1	1	1	1	1	1	1	1	1	1	1	1	1	1	1	1	1
OG0001938	HOG0001985	74	1	1	1	1	1	1	1	1	1	1	1	1	1	1	1	1	1	1	1	1	1	1	1	1	1	1	1	1	1	1	1	1	1	1	1	1	1	1	1	1	1	1	1	1	1	1	1
OG0001939	HOG0001986	74	1	1	1	1	1	1	1	1	1	1	1	1	1	1	1	1	1	1	1	1	1	1	1	1	1	1	1	1	1	1	1	1	1	1	1	1	1	1	1	1	1	1	1	1	1	1	1
OG0001940	HOG0001987	74	1	1	1	1	1	1	1	1	1	1	1	1	1	1	1	1	1	1	1	1	1	1	1	1	1	1	1	1	1	1	1	1	1	1	1	1	1	1	1	1	1	1	1	1	1	1	1
OG0001941	HOG0001988	74	1	1	1	1	1	1	1	1	1	1	1	1	1	1	1	1	1	1	1	1	1	1	1	1	1	1	1	1	1	1	1	1	1	1	1	1	1	1	1	1	1	1	1	1	1	1	1
OG0001942	HOG0001989	74	1	1	1	1	1	1	1	1	1	1	1	1	1	1	1	1	1	1	1	1	1	1	1	1	1	1	1	1	1	1	1	1	1	1	1	1	1	1	1	1	1	1	1	1	1	1	1
OG0001943	HOG0001990	74	1	1	1	1	1	1	1	1	1	1	1	1	1	1	1	1	1	1	1	1	1	1	1	1	1	1	1	1	1	1	1	1	1	1	1	1	1	1	1	1	1	1	1	1	1	1	1
OG0001944	HOG0001991	74	1	1	1	1	1	1	1	1	1	1	1	1	1	1	1	1	1	1	1	1	1	1	1	1	1	1	1	1	1	1	1	1	1	1	1	1	1	1	1	1	1	1	1	1	1	1	1
OG0001945	HOG0001992	74	1	1	1	1	1	1	1	1	1	1	1	1	1	1	1	1	1	1	1	1	1	1	1	1	1	1	1	1	1	1	1	1	1	1	1	1	1	1	1	1	1	1	1	1	1	1	1
OG0001946	HOG0001993	74	1	1	1	1	1	1	1	1	1	1	1	1	1	1	1	1	1	1	1	1	1	1	1	1	1	1	1	1	1	1	1	1	1	1	1	1	1	1	1	1	1	1	1	1	1	1	1
OG0001947	HOG0001994	74	1	1	1	1	1	1	1	1	1	1	1	1	1	1	1	1	1	1	1	1	1	1	1	1	1	1	1	1	1	1	1	1	1	1	1	1	1	1	1	1	1	1	1	1	1	1	1
OG0001948	HOG0001995	74	1	1	1	1	1	1	1	1	1	1	1	1	1	1	1	1	1	1	1	1	1	1	1	1	1	1	1	1	1	1	1	1	1	1	1	1	1	1	1	1	1	1	1	1	1	1	1
OG0001949	HOG0001996	74	1	1	1	1	1	1	1	1	1	1	1	1	1	1	1	1	1	1	1	1	1	1	1	1	1	1	1	1	1	1	1	1	1	1	1	1	1	1	1	1	1	1	1	1	1	1	1
OG0001950	HOG0001997	74	1	1	1	1	1	1	1	1	1	1	1	1	1	1	1	1	1	1	1	1	1	1	1	1	1	1	1	1	1	1	1	1	1	1	1	1	1	1	1	1	1	1	1	1	1	1	1
[truncated: 8,072 more rows]
[truncated: 29 more columns]

## Sheet: S3
Supplementary Data 3. Number of genes per P. siliginis strain belonging to the functional classes of the six hierarchical types of Plant Growth-Promoting Traits using the PLaBAse database.
Types	Plant_Growth_Promoting_Traits_functional_classes	OTU6_Psi_7	OTU6_Psi_8	OTU6_Psi_9	OTU6_Psi_10	OTU6_Psi_11	OTU6_Psi_12	OTU6_Psi_13	OTU6_Psi_14	OTU6_Psi_15	OTU6_Psi_16	OTU6_Psi_17	OTU6_Psi_18	OTU6_Psi_19	OTU6_Psi_20	OTU6_Psi_21	OTU6_Psi_22	OTU6_Psi_2	OTU6_Psi_5	OTU6_Psi_23	OTU6_Psi_24	OTU6_Psi_25	OTU6_Psi_26	OTU6_Psi_27	OTU6_Psi_28	OTU6_Psi_29	OTU6_Psi_30	OTU6_Psi_31	OTU6_Psi_32	OTU6_Psi_33	OTU6_Psi_34	OTU6_Psi_35	OTU6_Psi_36	OTU6_Psi_37	OTU6_Psi_38	OTU6_Psi_39	OTU6_Psi_40	OTU6_Psi_41	OTU6_Psi_42	OTU6_Psi_43	OTU6_Psi_44	OTU6_Psi_45	OTU6_Psi_46	OTU6_Psi_1	OTU6_Psi_47	OTU6_Psi_48	OTU6_Psi_49	OTU6_Psi_50	OTU6_Psi_51
Type_1	PGPT	3465	3531	3534	3428	3516	3501	3465	3482	3516	3483	3462	3453	3467	3509	3442	3501	3465	3488	3505	3533	3485	3472	3513	3469	3476	3516	3443	3499	3460	3448	3499	3501	3449	3547	3457	3474	3505	3525	3536	3447	3417	3457	3449	3527	3459	3490	3456	3472
Type_2	Direct Effects	905	940	923	885	922	927	905	905	925	915	899	911	913	915	900	916	896	895	923	932	908	907	928	914	909	923	899	911	908	898	912	930	892	944	915	904	939	948	927	902	888	907	900	922	901	916	903	907
	Indirect Effects	2528	2560	2578	2513	2561	2541	2527	2547	2560	2536	2533	2510	2523	2563	2513	2552	2539	2564	2549	2571	2543	2532	2555	2527	2535	2560	2513	2558	2519	2519	2556	2539	2528	2573	2512	2540	2535	2548	2578	2515	2500	2519	2519	2573	2527	2542	2524	2532
	Putative PGPTs	32	31	33	30	33	33	33	30	31	32	30	32	31	31	29	33	30	29	33	30	34	33	30	28	32	33	31	30	33	31	31	32	29	30	30	30	31	29	31	30	29	31	30	32	31	32	29	33
Type_3	Bio-Fertilization	426	430	435	411	435	434	428	421	428	427	420	424	423	425	416	426	412	410	432	429	429	430	427	430	424	435	414	426	424	420	425	427	415	427	415	423	428	426	424	416	409	423	415	431	421	434	425	430
	Bio-Remediation	230	262	237	227	235	241	229	234	239	238	229	237	238	238	237	236	235	236	239	246	231	229	245	232	234	237	235	237	231	230	238	250	229	264	247	232	258	272	250	237	228	233	237	236	232	232	225	229
	Colonizing Plant System	963	960	979	928	979	965	950	957	969	951	960	949	949	965	938	971	942	943	957	963	953	952	952	941	953	971	938	954	957	955	947	948	949	961	962	954	957	956	958	934	930	955	933	969	952	963	946	949
	Competitive Exclusion|CE	808	830	838	824	819	816	805	828	825	827	821	801	815	833	822	821	833	852	832	838	814	809	834	830	815	824	819	845	807	819	846	829	817	843	805	830	818	835	844	825	813	813	830	827	818	817	818	811
	Phytohormone|Plant Signal Production	249	248	251	247	252	252	248	250	258	250	250	250	252	252	247	254	249	249	252	257	248	248	256	252	251	251	250	248	253	248	249	253	248	253	253	249	253	250	253	249	251	251	248	255	248	250	253	248
	Plant Immune Response Stimulation	29	28	28	27	28	28	29	29	28	28	30	28	29	28	27	28	27	27	28	29	29	29	29	27	28	28	27	27	28	29	28	28	27	28	28	28	28	27	29	27	27	28	27	29	28	28	28	29
	Putative Functions	32	31	33	30	33	33	33	30	31	32	30	32	31	31	29	33	30	29	33	30	34	33	30	28	32	33	31	30	33	31	31	32	29	30	30	30	31	29	31	30	29	31	30	32	31	32	29	33
	Stress Control|Biocontrol	728	742	733	734	735	732	743	733	738	730	722	732	730	737	726	732	737	742	732	741	747	742	740	729	739	737	729	732	727	716	735	734	735	741	717	728	732	730	747	729	730	723	729	748	729	734	732	743
Type_4	CE-Bacterial Fitness	328	344	336	335	328	327	323	339	339	335	332	326	320	341	329	327	327	341	342	349	329	326	348	339	333	331	326	341	317	331	347	336	328	352	306	345	338	337	357	324	321	333	325	341	339	322	324	331
	CE-Bacterial Secretion	98	110	119	109	109	112	101	109	101	105	108	100	118	105	109	116	115	129	113	105	104	102	106	114	106	114	115	116	112	108	117	112	109	106	129	100	102	131	106	114	114	103	118	101	106	117	114	100
	CE-Cell Envelope Remodelling	168	165	167	170	169	165	167	170	169	172	167	166	167	170	167	166	169	170	163	168	167	167	168	171	168	166	167	172	166	167	167	167	167	172	166	171	166	165	169	168	166	167	168	168	165	166	168	167
	CE-Exopolysaccharide Production|EPS	43	42	43	42	42	43	45	42	43	42	43	41	43	43	45	41	44	43	41	43	44	44	41	38	40	41	42	40	41	43	41	42	43	42	42	41	42	35	40	42	42	44	42	43	39	41	41	43
	CE-Quorum Sensing Response|Biofilm Formation	164	163	165	162	164	162	162	161	164	165	163	161	160	166	165	164	172	163	165	166	163	163	164	160	161	165	163	169	164	162	167	165	164	162	153	165	162	158	164	170	164	159	170	167	162	164	164	163
	CE-Spore Production	7	6	8	6	7	7	7	7	9	8	8	7	7	8	7	7	6	6	8	7	7	7	7	8	7	7	6	7	7	8	7	7	6	9	9	8	8	9	8	7	6	7	7	7	7	7	7	7
	Carbon Dioxid Fixation	13	11	12	11	12	12	10	11	10	11	9	11	9	11	11	11	12	11	12	12	10	10	12	11	11	12	12	11	11	10	10	10	10	11	14	13	12	12	9	12	12	12	12	13	11	12	9	10
	Colonization-Adaption To Plant Immune System	8	10	10	9	10	10	8	8	10	10	11	8	8	10	8	9	9	8	10	8	8	8	8	8	8	10	7	9	9	9	8	9	9	10	8	8	8	8	9	8	8	8	8	8	8	10	8	8
	Colonization-Motility|Chemotaxis	113	107	119	110	113	113	111	112	115	112	114	109	109	115	109	113	104	111	114	116	112	111	112	111	112	114	112	116	113	114	112	114	111	114	114	111	113	112	110	110	108	111	110	113	111	112	115	110
	Colonization-Plant Cell Wall|Membrane Degradation	12	12	11	11	11	11	12	12	12	12	12	12	12	12	12	11	11	11	11	12	12	12	12	12	11	11	11	11	11	12	12	12	11	12	12	13	12	12	13	11	11	11	11	13	11	11	12	12
	Colonization-Plant Derived Substrate Usage	710	710	717	683	719	708	700	702	713	699	704	702	700	711	689	718	696	692	703	703	701	702	700	690	699	710	691	698	704	703	694	695	697	704	702	703	702	696	705	693	684	704	692	715	702	706	689	700
	Colonization-Surface Attachment	51	51	49	47	49	50	51	52	50	51	48	48	49	50	48	50	53	47	48	51	51	51	50	48	51	50	49	47	50	47	49	50	48	51	50	51	50	50	49	48	49	50	48	51	50	49	49	51
	Fluoride Detoxification	1	1	1	1	1	1	1	1	1	1	1	1	1	1	1	1	1	1	1	1	1	1	1	1	1	1	1	1	1	1	1	1	1	1	1	1	1	1	1	1	1	1	1	1	1	1	1	1
	Heavy Metal Detoxification	160	186	162	158	162	163	159	163	165	164	156	163	161	163	162	162	163	164	162	173	159	159	172	158	164	163	162	166	160	158	162	173	159	191	171	159	181	196	174	163	159	159	163	165	162	160	156	159
	Induction Of Systemic Resistance|ISR	18	18	18	17	18	18	18	18	18	18	18	18	18	18	17	18	17	17	18	18	18	18	18	18	18	18	17	17	18	18	18	18	17	18	18	18	18	18	18	17	17	18	17	18	18	18	18	18
	Iron Acquisition	95	97	102	93	100	101	98	97	99	97	96	98	97	96	94	99	95	91	99	100	99	100	99	100	99	102	91	96	98	93	97	100	94	101	87	97	99	99	97	91	91	97	90	98	97	102	100	99
	Neutralizing Abiotic Stress	483	491	494	486	491	484	492	488	498	490	487	487	486	495	481	493	486	490	492	495	495	492	493	486	490	496	484	487	491	484	489	490	487	496	484	488	492	488	495	482	483	483	482	492	487	492	491	492
	Neutralizing Biotic Stress	150	154	146	153	146	150	155	151	146	147	142	149	147	147	150	144	156	153	144	150	157	155	152	148	150	147	150	148	142	139	151	148	153	144	140	145	145	144	154	156	153	145	158	159	147	147	147	155
	Nitrogen Acquisition	104	105	102	96	101	103	105	101	103	103	103	103	104	103	100	101	96	97	101	103	105	105	103	104	101	102	100	105	101	104	106	102	99	101	99	102	103	102	101	99	96	103	99	106	100	102	104	105
	Other Colonization Related Proteins	22	22	21	22	21	21	22	21	22	21	21	21	21	21	22	22	24	22	21	22	22	22	22	22	21	21	21	23	22	21	22	21	21	22	21	22	23	22	21	21	22	22	21	22	22	22	22	22
	Phosphate Solubilization	154	155	158	147	159	157	153	153	151	152	149	152	153	151	150	153	147	147	158	155	153	153	154	156	154	159	148	153	153	150	153	156	149	151	157	153	152	154	157	151	148	152	151	153	153	158	153	154
	Phytohormone-Abscisic Acid Degradation	11	12	13	12	11	13	12	12	13	12	11	12	12	13	12	13	12	12	11	12	12	12	12	12	11	12	12	12	12	11	11	12	12	11	13	12	12	12	12	12	12	11	12	11	12	12	12	12
	Phytohormone-Cytokinins|Derivate Production	32	32	32	31	32	32	32	32	33	33	32	32	32	33	32	32	32	31	32	32	32	32	32	32	31	32	32	32	32	32	32	32	32	34	31	31	32	32	32	34	32	32	33	32	31	32	32	32
	Phytohormone-Gamma-Aminobutyric Acid|GABA Production	6	5	6	5	6	6	6	6	6	6	6	6	5	6	6	6	6	5	6	5	6	6	5	5	6	6	6	6	6	6	6	5	5	6	7	5	7	5	5	6	5	6	6	7	6	6	6	6
	Plant Signal-Branching Inhibition	24	24	24	26	24	24	24	23	27	24	26	24	25	24	24	26	24	26	24	26	24	24	25	24	24	24	24	23	26	25	23	24	26	23	25	25	24	24	23	23	24	24	23	24	24	24	25	24
	Plant Signal-Branching Stimulation	10	10	10	10	10	11	10	11	10	9	10	10	10	9	10	10	10	10	11	10	10	10	10	10	10	10	10	10	10	10	10	10	10	9	12	10	10	10	10	10	10	11	10	11	10	10	10	10
	Plant Signal-Carnitine Production	1	1	1	1	1	1	1	1	1	1	1	1	1	1	1	1	1	1	1	1	1	1	1	1	1	1	1	1	1	1	1	1	1	1	1	1	1	1	1	1	1	1	1	1	1	1	1	1
	Plant Signal-Embryogenesis	7	7	6	6	7	8	7	7	6	6	6	7	7	6	6	7	7	6	6	7	7	7	7	7	8	6	6	7	7	6	7	7	6	7	6	7	7	7	7	5	6	7	5	8	7	6	7	7
	Plant Signal-Germination Stimulation	24	24	23	24	23	24	24	24	24	24	23	24	24	25	24	24	24	24	23	24	24	24	24	25	25	23	26	24	24	23	25	23	23	24	24	25	25	23	24	23	24	24	23	24	24	23	24	24
	Plant Signal-Other Terpenoid|Derivate Production	4	4	4	4	4	4	4	4	4	4	4	4	4	4	5	4	4	4	4	4	4	4	4	4	4	4	5	4	4	4	4	4	4	4	4	4	4	4	4	4	4	4	4	4	4	4	4	4
	Plant Signal-Phospholipid Production	12	11	12	11	12	12	11	11	12	11	12	11	12	11	11	12	11	11	12	12	11	11	12	12	11	12	12	11	12	12	11	12	11	12	11	11	11	12	11	11	12	11	11	12	11	12	12	11
	Plant Signal-Ubiquinone|Coenzyme Q Production	13	13	15	14	15	13	13	13	15	14	12	13	13	14	14	14	14	14	14	13	13	13	13	14	14	15	14	14	14	12	13	13	14	14	13	13	13	13	13	14	14	14	14	13	13	15	13	13
	Plant Signalling Volatiles	23	23	24	23	25	24	23	23	24	23	25	23	23	23	23	23	25	23	25	23	23	23	23	23	24	24	23	23	23	24	23	23	24	23	23	23	23	23	24	24	24	23	24	24	23	24	23	23
	Plant Vitamin Production	82	82	81	80	82	80	81	83	83	83	82	83	84	83	79	82	79	82	83	88	81	81	88	83	82	82	79	81	82	82	83	87	80	85	83	82	84	84	87	82	83	83	82	84	82	81	84	81
	Potassium Solubilization	49	50	50	52	51	50	50	48	52	51	51	49	49	51	50	51	50	52	51	48	50	50	48	48	48	49	52	49	50	51	48	48	52	50	50	47	50	48	49	51	51	48	51	50	49	49	48	50
	Putative Functions-1	32	31	33	30	33	33	33	30	31	32	30	32	31	31	29	33	30	29	33	30	34	33	30	28	32	33	31	30	33	31	31	32	29	30	30	30	31	29	31	30	29	31	30	32	31	32	29	33
	Root Colonization	47	48	52	46	56	52	46	50	47	46	50	49	50	46	50	48	45	52	50	51	47	46	48	50	51	55	47	50	48	49	50	47	52	48	55	46	49	56	51	43	48	49	43	47	48	53	51	46
	Sulfur Assimilation|Mineralization	11	12	11	12	12	11	12	11	13	13	12	11	11	13	11	11	12	12	11	11	12	12	11	11	11	11	11	12	11	12	11	11	11	13	8	11	12	11	11	12	11	11	12	11	11	11	11	12
	Triggered Immunity	11	10	10	10	10	10	11	11	10	10	12	10	11	10	10	10	10	10	10	11	11	11	11	9	10	10	10	10	10	11	10	10	10	10	10	10	10	9	11	10	10	10	10	11	10	10	10	11
	Universal Stress Response	95	97	93	95	98	98	96	94	94	93	93	96	97	95	95	95	95	99	96	96	95	95	95	95	99	94	95	97	94	93	95	96	95	101	93	95	95	98	98	91	94	95	89	97	95	95	94	96
	Xenobiotics Biodegradation	69	75	74	68	72	77	69	70	73	73	72	73	76	74	74	73	71	71	76	72	71	69	72	73	69	73	72	70	70	71	75	76	69	72	75	72	76	75	75	73	68	73	73	70	69	71	68	69
Type_5	Adaption To PIS-Gallate|Tannine Degradation	0	1	0	0	0	0	0	0	0	0	0	0	0	0	0	0	0	0	1	0	0	0	0	0	0	0	0	0	0	0	0	0	0	0	0	0	0	0	0	0	0	0	0	0	0	0	0	0
	Adaption To PIS-Inhibition Of Salicylic Acid|Jasmonic Acid	3	4	4	4	4	4	3	3	5	5	6	3	3	5	3	4	4	3	4	3	3	3	3	3	3	4	2	4	4	4	3	4	4	5	3	3	3	3	4	3	3	3	3	3	3	4	3	3
	Adaption To PIS-Plant 2-Methylene-4-Butyrolactone Resistance	1	1	1	1	1	1	1	1	1	1	1	1	1	1	1	1	1	1	1	1	1	1	1	1	1	1	1	1	1	1	1	1	1	1	1	1	1	1	1	1	1	1	1	1	1	1	1	1
	Adaption To PIS-Plant Curcumin Resistance	2	2	2	2	2	2	2	2	2	2	2	2	2	2	2	2	2	2	2	2	2	2	2	2	2	2	2	2	2	2	2	2	2	2	2	2	2	2	2	2	2	2	2	2	2	2	2	2
	Adaption To PIS-Plant Hydroxycinnamic Acid Resistance	0	0	1	0	1	1	0	0	0	0	0	0	0	0	0	0	0	0	0	0	0	0	0	0	0	1	0	0	0	0	0	0	0	0	0	0	0	0	0	0	0	0	0	0	0	1	0	0
	Adaption To PIS-Plant Signalling Response	2	2	2	2	2	2	2	2	2	2	2	2	2	2	2	2	2	2	2	2	2	2	2	2	2	2	2	2	2	2	2	2	2	2	2	2	2	2	2	2	2	2	2	2	2	2	2	2
	Antiprotozoan|Antiprotistal Activity	0	0	0	0	0	0	0	0	1	1	1	0	0	1	0	0	0	0	0	0	0	0	0	0	0	0	0	0	0	1	0	0	0	1	0	0	0	0	0	0	0	0	0	0	0	0	0	0
	Bactericidal Compounds|Antibiotics	74	75	71	73	72	74	77	70	76	76	65	75	71	74	73	69	76	73	69	74	78	77	74	71	74	71	72	74	69	65	75	71	75	73	66	70	73	69	75	75	74	72	75	77	74	71	70	77
	Biotic Stress Resistance-Phenazine Derivates	10	11	11	10	11	11	10	10	10	10	10	10	10	10	10	10	10	10	10	10	10	10	10	10	10	11	10	10	10	10	10	10	10	10	10	10	10	10	10	10	10	10	10	10	10	11	10	10
	Biotic Stress Resistance-Volatiles	30	30	30	31	30	30	29	30	29	27	30	30	31	27	31	30	30	31	30	30	29	29	30	31	30	30	31	28	30	27	30	31	33	28	28	27	30	32	31	31	31	29	31	32	30	30	31	29
	CE-Arabinogalactan|Lipoarabinomannan Remodelling	1	1	1	2	1	1	1	2	1	1	1	3	2	1	2	1	1	2	1	2	1	1	2	2	2	1	1	2	1	1	3	2	2	1	1	1	2	2	2	1	2	2	1	1	1	1	2	1
	CE-Bacterial Fitness-Adaptive Mutation	4	3	7	3	3	4	3	4	4	3	3	3	4	7	5	3	3	6	7	5	3	3	3	4	5	5	7	3	4	6	4	4	4	8	7	6	3	7	5	3	4	3	4	6	3	5	4	3
	CE-Bacterial Fitness-CRISPR-CAS System	5	7	5	5	5	5	5	5	6	5	5	6	5	5	5	5	5	5	5	5	5	5	5	5	5	5	6	5	5	5	6	5	5	5	5	5	6	5	5	5	5	6	5	5	5	5	6	6
	CE-Bacterial Fitness-Energy Metabolism	30	30	30	30	30	30	30	30	30	30	30	30	30	29	30	30	30	30	30	32	30	30	30	32	31	30	30	31	30	29	30	32	31	31	29	30	30	30	30	29	30	30	29	30	30	30	30	30
	CE-Bacterial Fitness-Enviromental Surrival	3	3	3	3	3	3	3	3	3	3	4	3	4	3	3	3	3	3	3	3	3	3	3	2	4	3	3	3	3	4	3	4	3	3	3	4	3	2	4	3	3	5	3	3	3	3	3	3
	CE-Bacterial Fitness-Mobile Elements	14	17	13	16	19	14	13	19	12	9	17	13	17	15	14	17	20	13	19	22	16	13	25	21	15	9	16	18	13	13	19	22	12	17	8	22	11	18	26	11	16	14	12	15	19	10	15	13
	CE-Bacterial Fitness-Multidrug Resistance	107	105	107	107	106	107	108	106	115	110	102	104	102	109	104	107	101	110	103	104	109	108	104	105	104	109	105	103	105	104	105	100	112	109	107	107	105	102	106	109	101	105	109	111	104	104	101	108
	CE-Bacterial Fitness-Other Bacterial Defense Systems	2	1	2	3	2	2	2	3	2	2	2	1	1	2	2	2	2	3	2	3	2	2	3	2	1	2	3	2	2	2	1	3	4	2	1	2	2	2	3	2	2	2	2	2	1	2	2	2
	CE-Bacterial Fitness-Phage Defense System	33	34	33	33	34	33	33	33	32	33	32	30	32	32	33	33	32	33	35	32	33	33	32	32	33	33	33	36	33	33	33	32	33	32	32	32	33	33	32	33	33	33	33	33	32	33	33	33
	CE-Bacterial Fitness-Resistance To Antimicrobial|Toxic Compounds	69	72	68	66	68	68	70	69	73	72	69	69	69	73	67	67	67	67	66	72	70	70	71	67	66	67	66	65	65	72	69	67	66	75	65	66	70	67	71	69	65	67	67	71	66	66	69	70
	CE-Bacterial Fitness-Restriction|Modification System	10	9	13	12	7	9	7	11	12	11	12	16	8	13	12	10	9	17	18	13	9	10	15	12	11	12	12	9	8	12	16	13	10	11	12	11	17	12	14	10	10	13	11	13	12	10	10	12
	CE-Bacterial Fitness-Toxin-Antitoxin System	51	63	55	57	51	52	49	56	50	57	56	51	48	53	54	50	55	54	54	58	49	49	57	57	58	56	45	66	49	51	61	54	48	59	37	60	58	59	61	50	52	55	50	52	64	54	51	51
	CE-Biofilm Regulators	18	19	19	19	19	19	19	17	18	18	18	17	18	18	18	19	19	19	19	19	19	19	19	18	19	19	19	18	19	19	18	19	19	18	17	20	18	19	18	19	19	18	19	18	17	19	19	19
	CE-Biofilm Related Genes	13	13	13	13	14	13	13	13	13	13	14	13	13	13	13	13	16	14	13	13	13	13	13	11	13	14	13	13	13	13	13	13	13	13	7	13	13	13	13	16	14	13	16	13	13	13	13	13
	CE-Chaperone-Usher Secretion	2	2	2	2	2	2	2	2	2	2	2	2	2	2	2	2	2	2	2	2	2	2	2	2	2	2	2	2	2	2	2	2	2	2	2	2	2	2	2	2	2	2	2	2	2	5	2	2
	CE-EPS-Alginate Metabolism	14	14	14	14	14	14	14	14	14	14	15	14	15	15	14	14	14	14	14	14	14	14	14	14	14	14	14	15	14	14	14	14	14	14	14	14	14	14	14	14	14	14	14	14	14	14	14	14
	CE-EPS-Amylovoran Metabolism	1	2	1	1	1	1	2	2	1	1	2	1	2	1	3	1	2	1	1	1	2	2	1	2	1	1	2	2	1	1	2	1	2	1	1	1	2	0	1	1	2	1	1	1	1	1	2	2
	CE-EPS-Cellulose Metabolism	3	2	3	2	2	2	4	2	2	2	3	2	3	2	2	2	2	2	2	2	3	3	2	2	2	2	2	2	2	3	2	2	2	2	2	2	3	2	2	2	2	2	2	3	2	2	2	3
	CE-EPS-Colanic Acid Metabolism	4	3	4	3	3	3	4	4	3	3	3	3	3	3	4	3	3	3	3	5	4	4	3	4	3	3	3	3	3	3	3	5	3	3	3	3	3	2	3	3	3	3	3	4	3	3	3	4
	CE-EPS-Exopolysaccharide Transport	3	3	3	3	3	3	3	3	3	3	3	3	3	3	3	3	3	3	3	3	3	3	3	2	3	3	3	3	3	3	3	3	3	3	3	3	3	2	3	3	3	3	3	3	3	3	3	3
	CE-EPS-Glycan Metabolism	7	8	8	8	8	9	8	7	7	7	8	7	6	7	7	8	8	9	8	8	8	8	8	4	7	8	7	6	8	8	7	8	8	7	5	9	7	5	8	7	7	10	7	7	6	8	6	7
	CE-EPS-Glycosidases|Glycosylhydrolases	0	0	0	0	0	0	0	0	0	0	0	0	0	0	1	0	0	0	0	0	0	0	0	0	0	0	0	0	0	0	0	0	0	0	0	0	0	0	0	0	0	0	0	0	0	0	0	0
	CE-EPS-Polysaccharide Metabolism	0	0	0	0	0	0	0	0	0	0	0	0	0	0	2	0	0	0	0	1	0	0	1	0	1	0	0	1	0	0	0	0	0	0	0	0	0	0	0	0	0	0	0	0	1	0	0	0
	CE-EPS-Psl Polysaccharide Metabolism	2	2	2	2	2	2	2	2	2	2	3	2	2	2	2	2	2	2	2	2	2	2	2	2	2	2	2	2	2	3	2	2	2	2	2	2	2	2	2	2	2	2	2	2	2	2	3	2
	CE-EPS-Pss-Related Exopolysaccharide Metabolism	1	1	1	1	1	1	1	1	1	1	1	1	1	1	1	1	1	1	1	1	1	1	1	1	1	1	1	1	1	1	1	1	1	1	1	1	1	1	1	1	1	1	1	1	1	1	1	1
	CE-EPS-Putative Exopolysaccharide Function	5	5	5	5	6	6	5	4	7	6	3	5	6	6	4	5	5	5	5	4	5	5	4	5	4	5	6	3	5	5	4	4	6	6	6	4	4	5	4	6	5	6	6	5	4	5	5	5
	CE-EPS-Teichoic Acid Metabolism	3	2	2	3	2	2	2	3	3	3	2	3	2	3	2	2	4	3	2	2	2	2	2	2	2	2	2	2	2	2	3	2	2	3	5	2	3	2	2	3	3	2	3	3	2	2	2	2
	CE-Environmental Qsr|Bf Signalling	21	19	22	21	21	20	22	21	21	22	21	19	19	22	21	22	22	21	21	20	22	22	19	20	20	21	21	20	22	21	20	20	21	21	21	21	20	19	20	21	21	20	21	21	20	21	20	22
	CE-Glycerolipid Remodelling	14	14	14	14	14	14	14	15	15	15	15	13	15	15	15	15	15	14	14	14	14	14	14	16	14	14	15	14	15	14	13	15	14	15	15	14	13	15	15	15	15	14	15	14	13	14	15	14
	CE-Glycerophospholipid Remodelling	14	14	14	14	14	14	14	14	14	14	16	14	14	14	14	14	14	14	14	14	14	14	14	14	14	14	14	14	14	16	14	14	14	15	14	14	14	14	14	14	14	14	14	14	14	14	14	14
	CE-Other Cell Membrane Remodelling Proteins	14	14	14	14	14	14	14	14	14	14	14	14	14	14	14	14	14	14	14	14	14	14	14	14	14	14	14	14	14	14	14	14	14	14	15	14	14	14	14	14	14	14	14	14	14	14	14	14
	CE-Other Qsr|Bf Related Systems	55	53	54	55	54	54	55	56	57	58	55	56	52	57	55	54	58	55	56	54	56	56	53	55	55	55	53	63	54	54	60	55	55	56	57	56	55	53	54	58	55	53	58	56	56	55	54	56
	CE-Other Remodelling Sugar Phosphoramidate Modification	0	0	0	0	0	0	0	0	0	0	1	0	0	0	0	0	0	0	0	0	0	0	0	0	0	0	0	0	0	1	0	0	0	0	0	0	0	0	0	0	0	0	0	0	0	0	0	0
	CE-Other Remodelling Surface Glycosylation Patterns	2	1	1	1	1	1	1	2	1	2	1	1	1	1	2	1	2	1	2	1	1	1	1	1	1	1	2	1	1	2	2	2	2	2	1	1	1	1	1	2	2	2	2	2	1	1	1	1
	CE-Peptidoglycan Remodelling	53	53	55	54	54	54	53	54	53	54	54	53	54	53	53	54	54	54	54	54	53	53	54	55	54	55	53	55	54	53	54	53	53	54	53	54	54	53	54	54	53	54	54	53	54	55	54	53
	CE-Phosphatidylinositol Mannoside Remodelling	2	2	2	3	3	2	2	2	2	2	2	3	2	3	2	2	2	3	2	2	2	2	2	3	2	2	2	3	2	2	2	3	3	2	3	3	3	2	2	2	2	2	2	2	2	2	2	2
	CE-QSR-Autoinducer Perception	36	36	36	35	34	35	33	33	33	33	33	35	36	34	38	35	35	35	35	38	33	33	38	35	34	35	36	35	35	33	36	36	35	33	30	33	35	34	37	36	35	34	36	37	35	35	36	33
	CE-QSR|BF-cell Density Regulation	3	3	3	2	3	3	3	3	3	2	3	3	3	3	3	3	5	2	3	3	3	3	3	3	3	3	4	3	3	3	3	3	4	2	3	3	3	3	3	3	3	3	3	3	3	3	3	3
	CE-Quorum Quenching	0	1	0	0	0	0	0	0	0	0	1	0	0	0	0	0	0	0	0	0	0	0	0	0	0	0	0	0	0	1	0	0	0	0	0	0	0	0	0	0	0	0	0	0	0	0	0	0
	CE-Quorum Sensing Regulators	7	7	7	7	7	7	7	8	7	8	7	7	7	7	7	7	7	7	7	7	7	7	7	7	7	7	7	7	7	7	7	7	7	8	6	7	7	7	7	7	7	7	7	7	7	7	7	7
	CE-Quorum Sensing Related Genes	11	12	11	10	12	11	10	10	12	11	11	11	12	12	10	11	10	10	11	12	10	10	12	11	10	11	10	10	11	11	10	12	10	11	12	12	11	10	12	10	10	11	10	12	11	11	12	10
	CE-Remodellinglipo-|Colanic Acid Production	3	3	2	3	2	2	3	3	2	2	2	2	2	2	3	2	2	3	2	2	3	3	2	2	2	2	2	2	2	2	2	2	2	2	2	2	2	2	2	2	2	2	2	3	2	2	2	3
	CE-Remodellinglipo-|Teichuronic Acid Metabolism	1	1	1	1	1	1	1	1	1	1	1	1	1	1	1	1	1	1	1	1	1	1	1	0	1	1	1	1	1	1	1	1	1	1	1	1	1	0	1	1	1	1	1	1	1	1	1	1
	CE-Remodellinglps|Lipid|IVa Metabolism	64	62	63	64	65	62	64	63	66	67	60	62	62	66	61	62	64	64	59	64	64	64	64	64	64	62	63	66	62	61	62	61	62	66	61	67	62	62	64	63	61	62	63	64	63	62	63	64
	CE-Sec-Secretion Pathway	2	2	2	2	2	2	2	2	2	2	2	2	2	2	2	2	2	2	2	2	2	2	2	2	2	2	2	2	2	2	2	2	2	2	2	2	2	2	2	2	2	2	2	2	2	2	2	2
	CE-Spore Formation|Germination	7	6	8	6	7	7	7	7	9	8	8	7	7	8	7	7	6	6	8	7	7	7	7	8	7	7	6	7	7	8	7	7	6	9	9	8	8	9	8	7	6	7	7	7	7	7	7	7
	CE-Tat-Twin-Arginine Translocation Pathway	3	3	3	3	3	3	3	3	3	3	3	3	3	3	3	3	3	3	3	3	3	3	3	3	3	3	3	3	3	3	3	3	3	3	3	3	3	3	3	3	3	3	3	3	3	3	3	3
	CE-Type I Secretion Systems	16	16	17	17	17	17	16	16	16	16	17	16	18	16	17	18	20	17	17	16	16	16	16	17	16	17	17	17	18	17	16	17	17	16	17	16	16	17	17	17	17	16	17	16	17	17	17	16
	CE-Type II Secretion Systems	27	28	29	27	27	27	28	27	27	27	27	29	29	28	28	28	31	31	29	28	28	28	28	28	27	29	29	27	28	27	27	28	29	28	26	28	28	30	28	32	29	27	32	27	27	29	28	28
	CE-Type III Secretion Systems	6	6	6	6	6	6	6	6	6	6	6	6	6	6	6	6	6	6	6	6	6	6	6	6	6	6	6	6	6	6	6	6	6	6	6	6	6	6	6	6	6	6	6	6	6	6	6	6
	CE-Type IV Secretion Systems	5	13	8	7	5	6	5	6	5	6	6	5	7	5	5	6	5	20	6	5	5	5	5	6	5	6	6	5	6	5	6	6	5	5	24	5	5	23	5	5	8	6	6	5	5	6	6	5
	CE-Type V Secretion Systems	12	13	20	15	13	15	14	18	10	13	13	12	20	14	15	18	16	17	15	13	17	15	14	18	15	15	21	16	15	11	14	16	15	12	10	13	14	14	14	16	17	12	19	14	16	17	18	13
	CE-Type VI Secretion Systems	25	27	32	30	34	34	25	29	30	30	32	25	31	29	31	33	30	31	33	30	25	25	30	32	30	34	29	38	32	35	41	32	30	32	39	25	26	34	29	31	30	29	31	26	28	32	32	25
	CO2 Fixation-Alternative Pahtways	1	1	1	1	1	1	1	1	1	1	1	1	1	1	1	1	1	1	1	1	1	1	1	1	1	1	1	1	1	1	1	1	1	1	1	1	1	1	1	1	1	1	1	1	1	1	1	1
	CO2 Fixation-Rubisco	12	10	11	10	11	11	9	10	9	10	8	10	8	10	10	10	11	10	11	11	9	9	11	10	10	11	11	10	10	9	9	9	9	10	13	12	11	11	8	11	11	11	11	12	10	11	8	9
	Chemotaxis Proteins	30	30	30	28	30	30	30	30	30	30	30	30	30	30	28	29	28	28	30	33	31	30	32	30	30	32	29	31	29	29	30	30	29	32	30	31	30	34	32	28	28	30	28	31	30	30	31	30
	Colonization-Host Invasion Factors	22	22	21	22	21	21	22	21	22	21	21	21	21	21	22	22	24	22	21	22	22	22	22	22	21	21	21	23	22	21	22	21	21	22	21	22	23	22	21	21	22	22	21	22	22	22	22	22
	Fluoride Resistance	1	1	1	1	1	1	1	1	1	1	1	1	1	1	1	1	1	1	1	1	1	1	1	1	1	1	1	1	1	1	1	1	1	1	1	1	1	1	1	1	1	1	1	1	1	1	1	1
	Fungicidal Compounds|Antibiotics	23	28	22	25	21	23	24	26	20	21	20	23	24	24	24	23	24	26	22	23	25	24	25	24	25	23	24	25	21	21	24	23	22	21	27	25	22	22	25	25	26	24	27	27	22	23	25	24
	Heavy Metal Antimony Resistance	5	5	5	5	5	5	5	7	7	8	5	5	5	7	5	5	5	5	5	5	5	5	5	5	5	5	5	5	5	5	5	5	5	7	5	5	5	7	5	5	5	5	5	8	5	5	7	5
	Heavy Metal Arsenic Resistance	4	4	4	4	4	4	4	5	5	5	4	4	4	5	4	4	5	4	4	4	4	4	4	4	5	4	4	5	4	4	4	4	4	5	4	4	4	5	4	4	4	4	4	4	5	4	5	4
	Heavy Metal Bismuth Resistance	2	2	2	1	2	2	2	2	2	2	1	2	2	2	1	2	1	1	2	2	2	2	2	2	2	2	1	2	2	2	2	2	1	2	2	2	2	2	2	1	1	2	1	2	2	2	2	2
	Heavy Metal Cadmium Resistance	2	2	2	2	2	2	2	2	2	2	2	2	2	2	2	2	2	2	2	2	2	2	2	2	2	2	2	2	2	2	2	2	2	2	2	2	2	3	2	2	2	2	2	2	2	2	2	2
	Heavy Metal Chromate Resistance	4	4	5	5	5	5	4	4	4	4	5	4	4	4	5	5	5	5	5	4	4	4	4	5	4	5	5	4	5	5	4	5	5	4	4	4	5	4	4	4	5	4	4	4	4	5	4	4
	Heavy Metal Cobalt Resistance	10	11	10	10	10	10	11	10	11	11	11	10	11	11	10	10	10	10	10	11	11	11	12	10	11	10	10	10	10	11	11	12	10	13	12	11	12	15	12	10	10	10	10	10	10	10	10	11
	Heavy Metal Copper Resistance	27	42	27	26	27	27	27	27	27	28	26	29	27	27	28	28	27	28	27	38	27	27	37	28	29	28	28	33	27	27	26	35	27	42	36	28	38	45	37	28	26	27	28	28	28	26	25	27
	Heavy Metal Gold Resistance	5	6	5	5	5	5	5	5	4	4	4	5	5	4	5	5	4	5	5	5	5	5	5	5	5	5	5	6	5	4	5	5	5	4	5	5	5	5	5	5	5	5	5	5	5	5	5	5
	Heavy Metal Iron Resistance	55	57	57	57	58	58	55	56	58	56	54	56	57	57	57	56	58	57	57	53	55	55	52	54	55	57	57	54	56	54	56	54	57	55	52	54	57	54	54	57	57	56	57	55	57	57	53	55
	Heavy Metal Lead Resistance	3	3	3	3	3	3	3	3	3	3	3	3	3	3	3	3	3	3	3	3	3	3	3	3	3	3	3	3	3	3	3	3	3	3	3	3	3	3	3	3	3	3	3	3	3	3	3	3
	Heavy Metal Manganese Resistance	4	4	4	4	4	4	4	4	4	4	4	3	4	4	4	4	4	4	4	3	4	4	3	4	4	4	4	4	4	4	4	4	4	4	4	3	4	4	4	4	4	4	4	4	3	4	4	4
	Heavy Metal Nickel Resistance	5	5	5	5	5	5	5	5	5	5	4	5	5	5	5	5	5	5	5	5	5	5	5	4	5	5	5	5	5	5	5	4	5	5	4	5	5	5	4	5	5	5	5	5	5	5	4	5
	Heavy Metal Selenium Resistance	7	8	7	7	7	7	7	7	7	7	7	8	7	7	7	7	7	7	7	7	7	7	7	7	7	7	7	7	7	7	7	7	7	7	7	7	7	7	7	7	7	7	7	7	7	7	8	7
	Heavy Metal Tellurium Resistance	3	3	3	3	3	3	3	3	3	3	4	4	3	3	4	3	4	5	3	3	3	3	3	3	3	3	4	4	3	3	4	3	3	8	3	3	3	3	3	3	3	3	3	3	3	3	3	3
	Heavy Metal Zink Resistance	19	18	18	17	18	18	17	18	18	17	17	18	18	17	17	18	19	18	18	18	17	17	18	17	19	18	17	18	18	17	18	18	17	17	17	18	18	18	18	20	18	17	20	20	18	18	17	17
	High Temperature Tolerance	26	27	27	27	27	28	28	27	27	26	24	26	26	28	27	27	27	30	27	27	28	28	28	27	26	28	26	28	26	25	28	28	26	27	27	26	28	27	28	26	27	27	26	28	26	28	26	28
	ISR-Homoserine Lactones Derivate Metabolism	2	2	2	2	2	2	2	2	2	2	2	2	2	2	2	2	2	2	2	2	2	2	2	2	2	2	2	2	2	2	2	2	2	2	2	2	2	2	2	2	2	2	2	2	2	2	2	2
	ISR-Vitamin B1|Thiamin Metabolism	14	13	14	13	14	14	14	14	14	14	14	14	14	14	13	14	13	13	14	14	14	14	14	14	14	14	13	14	14	14	14	14	13	14	14	14	14	14	14	13	13	14	13	14	14	14	14	14
	ISR-Vitamin B2|Riboflavin Metabolism	1	2	1	1	1	1	1	1	1	1	1	1	1	1	1	1	1	1	1	1	1	1	1	1	1	1	1	0	1	1	1	1	1	1	1	1	1	1	1	1	1	1	1	1	1	1	1	1
	ISR-Volatiles	1	1	1	1	1	1	1	1	1	1	1	1	1	1	1	1	1	1	1	1	1	1	1	1	1	1	1	1	1	1	1	1	1	1	1	1	1	1	1	1	1	1	1	1	1	1	1	1
	Insecticidal Compounds	11	8	10	12	10	10	13	13	9	11	14	9	9	10	10	10	14	11	11	11	13	13	11	10	9	10	11	9	10	13	10	11	11	10	8	11	8	9	11	13	10	8	13	11	9	10	9	13
	Iron Acquisition-Hemophores	7	7	7	7	7	7	7	7	8	8	7	7	7	8	7	7	7	7	7	8	7	7	8	8	8	7	7	8	7	7	7	8	7	8	6	8	7	8	8	7	7	7	7	7	8	7	8	7
	Iron Acquisition-Iron Homoeostasis	17	17	17	13	17	17	17	17	17	17	17	17	17	17	14	16	13	13	17	18	17	17	17	17	16	17	14	17	16	17	17	16	14	17	17	17	17	17	17	13	13	17	13	17	17	17	17	17
	Iron Acquisition-Other Transport Systems	44	45	44	44	45	45	47	44	44	46	41	44	44	44	46	46	46	44	45	46	47	47	46	44	45	44	44	43	45	41	45	44	44	46	35	43	43	45	43	44	44	43	44	45	43	44	44	47
	Iron Acquisition-Siderophores	27	28	34	29	31	32	27	29	30	26	31	30	29	27	27	30	29	27	30	28	28	29	28	31	30	34	26	28	30	28	28	32	29	30	29	29	32	29	29	27	27	30	26	29	29	34	31	28
	K-Solubilization-Organic Acid Metabolism	46	47	47	49	48	47	47	45	49	48	48	46	46	48	47	48	47	49	48	45	47	47	45	45	45	46	49	46	47	48	45	45	49	47	47	44	47	45	46	48	48	45	48	47	46	46	45	47
	K-Solubilization-Potassium Transport	3	3	3	3	3	3	3	3	3	3	3	3	3	3	3	3	3	3	3	3	3	3	3	3	3	3	3	3	3	3	3	3	3	3	3	3	3	3	3	3	3	3	3	3	3	3	3	3
	Low Temperature Tolerance	11	13	11	11	11	11	12	12	12	12	11	11	11	12	11	11	11	11	11	11	12	12	11	12	11	11	11	11	11	11	11	11	11	14	12	11	12	12	11	12	11	12	12	11	11	11	12	12
	Motility-Flagellar Assembly	33	34	33	33	33	33	33	34	33	33	33	34	33	33	33	33	33	33	33	34	33	33	34	33	33	33	33	33	33	33	33	34	33	34	34	33	35	34	34	33	33	33	33	33	33	33	33	33
	Motility-Flagellum Control	26	23	27	25	25	24	22	23	25	24	25	24	26	25	25	26	24	25	27	26	23	22	26	25	25	25	25	27	27	26	23	26	25	23	24	22	23	24	24	25	23	23	25	25	24	25	26	22
	Motility-Pilus|Fimbriae System	22	18	25	22	22	22	24	23	24	23	24	19	18	24	21	22	17	23	22	21	23	24	18	21	22	21	23	23	22	24	24	22	22	23	23	23	23	18	18	22	22	23	22	22	22	21	23	23
	N-Aquisition-Allantoin Usage	1	2	1	1	1	1	1	1	1	1	1	1	1	1	1	1	1	1	1	1	1	1	1	1	1	1	1	1	2	1	1	1	1	1	1	1	1	1	1	1	1	1	1	1	1	1	1	1
	N-Aquisition-Ammonium Assimilation Usage	12	12	12	12	12	12	11	11	10	11	12	11	12	11	12	12	11	12	12	12	11	11	12	12	12	12	12	12	12	12	12	11	12	11	12	12	11	12	12	11	12	11	11	12	12	12	12	11
	N-Aquisition-Atmoshpheric Nitrogen Fixation	16	15	15	14	14	16	16	15	16	16	15	16	15	16	15	15	14	15	16	15	16	16	15	15	16	15	15	16	14	15	17	14	14	15	15	15	16	15	15	15	14	16	15	16	16	15	15	16
	N-Aquisition-Cynate Usage	1	1	1	1	1	1	1	1	1	1	1	1	1	1	1	1	1	1	1	1	1	1	1	1	1	1	1	1	1	1	1	1	1	1	1	1	1	1	1	1	1	1	1	1	1	1	1	1
	N-Aquisition-Denitrification|Nitrate Usage	19	20	18	17	18	19	20	18	19	19	18	19	20	19	17	18	18	17	17	19	20	20	19	19	19	18	17	20	18	19	19	20	17	18	19	19	19	18	18	17	17	19	17	21	19	18	20	20
	N-Aquisition-Ethanolamine Usage	2	2	2	2	2	2	2	2	2	2	2	2	2	2	2	2	2	2	2	2	2	2	2	2	2	2	2	2	2	2	2	2	2	2	2	2	2	2	2	2	2	2	2	2	2	2	2	2
	N-Aquisition-Regulation	19	19	19	19	19	18	20	19	20	19	20	19	19	19	19	18	18	19	18	19	20	20	19	19	18	19	19	18	18	20	19	19	19	19	18	18	19	19	18	19	19	19	19	19	18	19	19	20
	N-Aquisition-Related Functions	13	13	13	9	13	13	13	13	13	13	13	13	13	13	12	13	10	9	13	13	13	13	13	13	10	13	12	14	13	13	13	13	12	13	10	13	13	13	13	12	9	13	12	13	10	13	13	13
	N-Aquisition-Trigonelline Usage	4	4	4	4	4	4	4	4	4	4	4	4	4	4	4	4	4	4	4	4	4	4	4	4	4	4	4	4	4	4	4	4	4	4	4	4	4	4	4	4	4	4	4	4	4	4	4	4
	N-Aquisition-Urea Usage	17	17	17	17	17	17	17	17	17	17	17	17	17	17	17	17	17	17	17	17	17	17	17	18	18	17	17	17	17	17	18	17	17	17	17	17	17	17	17	17	17	17	17	17	17	17	17	17
	Nematicidal Compounds	1	1	1	1	1	1	1	1	0	0	1	1	1	0	1	1	1	1	1	1	1	1	1	1	1	1	1	1	1	1	1	1	1	0	0	1	1	1	1	1	1	1	1	1	1	1	1	1
	Neutralizing Acidic Stress	11	10	11	11	11	12	11	11	11	11	11	10	10	11	12	11	11	11	11	10	11	11	10	10	11	11	11	11	11	11	11	10	11	11	11	11	11	10	11	11	11	11	11	11	11	13	11	11
	Neutralizing Herbicidial Stress	5	4	5	5	5	4	4	5	5	5	5	5	4	5	5	5	5	5	5	5	4	4	5	4	5	6	5	4	5	4	5	4	5	6	5	5	5	5	5	5	5	4	5	5	5	5	4	4
	Neutralizing Osmotic Stress	72	71	72	71	71	71	72	72	73	72	71	73	72	72	69	74	71	72	74	74	73	72	73	73	72	70	71	71	74	71	71	72	73	71	72	72	72	73	74	70	71	72	70	74	73	70	73	72
	Neutralizing Salinity Stress	173	173	176	174	179	174	173	175	176	173	176	175	175	174	171	176	175	175	176	180	174	173	179	173	176	178	173	174	176	175	173	176	174	173	171	175	175	175	174	173	170	172	173	173	175	176	177	173
	Nitrosative|Oxidative Stress|Ros Scavenging	185	193	192	187	187	184	192	186	194	191	189	187	188	193	186	189	186	186	188	188	193	192	187	187	189	192	187	188	188	187	190	189	187	194	186	188	189	186	192	185	188	185	185	190	186	189	188	192
	Other Biotic Stress Resistance Genes	1	1	1	1	1	1	1	1	1	1	1	1	1	1	1	1	1	1	1	1	1	1	1	1	1	1	1	1	1	1	1	1	1	1	1	1	1	1	1	1	1	1	1	1	1	1	1	1
	Other Heavy Metal Resistance Systems	5	12	5	4	4	5	5	5	5	5	5	5	4	5	5	5	4	5	5	10	5	5	10	5	5	5	5	4	4	5	6	10	4	13	11	5	11	16	10	5	4	5	5	5	5	4	4	5
	Other Motility Regulating Functions	2	2	4	2	3	4	2	2	3	2	2	2	2	3	2	3	2	2	2	2	2	2	2	2	2	3	2	2	2	2	2	2	2	2	3	2	2	2	2	2	2	2	2	2	2	3	2	2
	P-Solubilisation-Organic Acid Metabolism	106	108	106	103	108	106	104	105	106	107	101	105	105	106	104	105	106	103	106	104	104	104	105	105	105	107	104	105	105	101	104	105	105	106	105	105	104	105	107	104	104	105	104	105	105	106	104	105
	P-Solubilisation-Other Acid Metabolism	20	20	25	20	24	24	21	20	20	20	20	20	20	20	21	21	20	20	25	22	21	21	20	22	20	25	20	20	21	21	20	22	20	20	25	20	20	20	21	21	20	20	21	20	20	25	20	21
	P-Solubilisation-Phosphatase Activity	2	2	2	2	2	2	2	2	2	2	2	1	2	2	2	2	2	2	2	2	2	2	2	2	2	2	2	2	2	2	2	2	2	2	2	2	2	2	2	2	2	2	2	2	2	2	2	2
	P-Solubilisation-Phosphate Metabolism	26	25	25	22	25	25	26	26	23	23	26	26	26	23	23	25	19	22	25	27	26	26	27	27	27	25	22	26	25	26	27	27	22	23	25	26	26	27	27	24	22	25	24	26	26	25	27	26
	Pamp|Effector Triggered Immunity|PTI	11	10	10	10	10	10	11	11	10	10	12	10	11	10	10	10	10	10	10	11	11	11	11	9	10	10	10	10	10	11	10	10	10	10	10	10	10	9	11	10	10	10	10	11	10	10	10	11
	Phytohormone-Auxine|Indole‐3‐acetic Acid|Iaa Metabolism	11	12	13	12	11	13	12	12	13	12	11	12	12	13	12	13	12	12	11	12	12	12	12	12	11	12	12	12	12	11	11	12	12	11	13	12	12	12	12	12	12	11	12	11	12	12	12	12
	Phytohormone-Cytokinin Metabolism	15	15	15	15	15	15	15	15	15	15	15	15	15	15	15	15	15	15	15	15	15	15	15	15	15	15	15	15	15	15	15	15	15	16	15	15	15	15	15	15	15	15	15	15	15	15	15	15
	Phytohormone-GABA Metabolism	6	5	6	5	6	6	6	6	6	6	6	6	5	6	6	6	6	5	6	5	6	6	5	5	6	6	6	6	6	6	6	5	5	6	7	5	7	5	5	6	5	6	6	7	6	6	6	6
	Phytohormone-Xanthine Metabolism	17	17	17	16	17	17	17	17	18	18	17	17	17	18	17	17	17	16	17	17	17	17	17	17	16	17	17	17	17	17	17	17	17	18	16	16	17	17	17	19	17	17	18	17	16	17	17	17
	Plant Branching-Auxin|Iaa Metabolism	10	10	10	10	10	11	10	11	10	9	10	10	10	9	10	10	10	10	11	10	10	10	10	10	10	10	10	10	10	10	10	10	10	9	12	10	10	10	10	10	10	11	10	11	10	10	10	10
	Plant Debranching-Spermidine|Putrescine Metabolism	24	24	24	26	24	24	24	23	27	24	26	24	25	24	24	26	24	26	24	26	24	24	25	24	24	24	24	23	26	25	23	24	26	23	25	25	24	24	23	23	24	24	23	24	24	24	25	24
	Plant Degradative Glycosidases|Glycosylhydrolases	6	6	5	5	5	5	6	6	6	6	6	6	6	6	5	5	5	5	5	6	6	6	6	6	5	5	5	5	5	6	6	6	5	6	6	7	6	6	6	5	5	5	5	7	5	5	6	6
	Plant Derived Amine Usage	2	2	2	2	2	2	3	2	3	3	2	2	2	3	2	2	2	2	2	2	3	3	2	2	2	2	2	2	2	2	2	2	2	3	2	2	2	2	2	2	2	2	2	2	2	2	2	3
	Plant Derived Amino Acid Dependent Pathways	31	31	30	30	30	30	30	31	32	31	31	31	30	32	30	31	30	31	30	30	30	30	30	30	31	30	31	31	31	31	30	30	32	31	31	30	31	30	30	31	30	32	31	31	31	30	30	30
	Plant Derived Amino Acid Transport	87	88	90	87	90	90	87	87	87	85	88	88	89	87	88	93	83	87	90	87	87	87	87	87	83	92	84	84	93	87	88	88	84	86	81	85	88	88	89	82	83	87	82	88	83	90	84	87
	Plant Derived Amino Acid Utilization	81	80	83	79	82	81	80	79	84	76	83	82	82	82	80	84	83	79	81	79	80	81	79	78	79	82	84	81	79	87	81	80	85	78	83	79	79	79	81	80	81	81	80	82	80	82	79	80
	Plant Derived Amino|Nucleotide Sugar Utilization	12	11	11	11	12	12	12	12	12	12	11	11	12	12	11	11	12	11	11	11	12	12	11	11	12	11	11	11	11	11	11	11	12	12	12	10	11	11	11	13	11	11	13	12	11	11	11	12
	Plant Derived Aromatic|Phenolic Compound Utilization	26	27	33	24	25	32	26	25	30	24	25	25	24	30	24	33	24	24	27	26	26	26	25	24	25	27	25	25	27	25	25	24	25	25	32	23	26	26	24	25	24	26	25	26	25	26	24	26
	Plant Derived Carbohydrate Transport	39	39	39	39	39	38	38	39	39	39	39	38	39	39	39	39	40	39	39	38	38	38	38	37	38	39	38	39	39	39	39	38	39	39	38	38	39	38	37	40	39	39	40	39	38	39	38	38
	Plant Derived Carbohydrate Usage-Others	6	6	6	6	6	6	6	6	6	6	6	6	6	6	7	5	6	6	6	6	6	6	6	6	6	6	6	6	5	6	6	6	6	6	6	6	6	6	6	6	6	6	6	6	6	6	6	6
	Plant Derived Carbohydrate-General Usage	28	26	27	25	30	25	27	26	26	25	24	26	25	26	25	27	27	26	26	25	28	27	25	25	25	26	25	25	27	25	25	25	26	27	28	29	26	25	25	27	26	26	27	28	25	26	26	27
	Plant Derived Carbohydrate-Hexoses Utilization	29	28	28	29	28	27	27	29	28	29	29	26	27	31	27	28	27	27	28	29	27	27	28	26	29	29	27	28	28	26	27	27	28	29	28	31	27	28	28	29	27	26	28	31	28	29	28	27
	Plant Derived Carbohydrate-Pentoses Utilization	24	23	23	24	23	23	22	24	22	22	23	25	26	21	24	24	24	24	23	25	22	22	25	25	23	23	23	23	24	23	23	23	23	24	24	24	25	25	23	24	24	24	24	25	24	23	23	22
	Plant Derived Carnithine Usage	18	17	17	16	19	18	18	17	18	17	18	17	17	17	16	18	17	18	19	18	18	18	17	17	18	17	17	18	18	18	17	17	17	18	17	18	17	17	20	17	16	17	17	18	18	17	17	18
	Plant Derived Complex Sugar Utilization	14	14	14	14	14	14	14	14	15	15	14	14	14	15	14	14	14	15	14	15	14	14	15	15	15	14	14	15	14	14	14	15	14	15	14	15	14	15	15	15	14	14	15	14	15	14	15	14
	Plant Derived Flavonoid Utilization	6	6	6	5	6	6	6	6	6	6	6	6	5	6	5	6	6	5	6	5	6	6	5	5	6	6	5	6	6	6	6	5	5	6	6	6	6	6	5	5	5	6	5	6	6	6	5	6
	Plant Derived Glycoside Utilization	9	8	7	7	7	8	7	9	9	7	8	8	7	8	7	9	9	8	9	7	7	8	7	7	6	7	8	7	7	8	7	8	7	8	9	7	8	7	8	8	6	8	9	9	10	7	8	7
	Plant Derived Lipid Metabolism	25	25	27	24	27	26	25	25	28	30	26	26	25	28	24	26	24	23	26	26	25	25	26	26	26	27	23	26	26	26	25	26	23	26	23	26	25	26	25	25	24	27	25	25	27	27	25	25
	Plant Derived Nucleoside Metabolism	113	115	116	113	115	113	113	114	115	117	113	116	115	115	115	113	115	115	112	115	113	113	115	112	116	115	115	116	113	113	113	114	116	116	114	117	114	113	118	112	114	113	111	113	113	114	115	113
	Plant Derived Organic Acid Transport	30	30	30	24	29	29	29	29	29	29	30	29	29	29	26	29	29	25	28	28	29	29	28	28	28	29	26	28	29	29	28	28	26	29	28	30	29	28	28	27	26	30	27	30	28	29	28	29
	Plant Derived Organic Acid Utilization	51	53	51	49	53	51	51	51	49	51	51	50	52	49	49	51	49	50	51	53	51	51	53	52	52	51	50	51	51	51	51	53	50	51	51	50	53	49	53	49	50	51	49	51	52	51	50	51
	Plant Derived Stachydrine Usage	2	2	2	2	2	2	2	2	2	2	2	2	2	2	2	2	2	2	2	2	2	2	2	2	2	2	2	2	2	2	2	2	2	2	2	2	2	2	2	2	2	2	2	2	2	2	2	2
	Plant Derived Sugar Acid Utilization	50	54	47	47	53	48	49	49	47	47	48	48	46	47	48	47	47	49	47	47	49	49	47	47	49	47	48	47	46	48	47	46	48	47	47	47	48	47	47	48	47	49	48	50	50	47	46	49
	Plant Derived Sugar Alcohol Utilization	11	11	12	12	12	12	12	11	11	12	12	11	11	11	12	12	11	12	12	12	12	12	12	12	12	12	12	10	12	11	12	12	12	11	11	12	11	12	12	12	12	12	12	11	12	12	12	12
	Plant Derived Terpene Utilization	12	10	11	10	10	11	12	11	11	10	11	11	11	11	10	10	10	10	10	12	12	12	12	12	11	11	11	12	10	11	11	10	11	11	11	12	11	12	11	10	11	11	10	12	11	11	11	12
	Plant Derived Trigonelline Usage	4	4	5	4	5	4	4	4	4	4	4	4	4	4	4	4	5	4	4	5	4	4	5	4	5	5	4	5	4	4	4	5	4	4	4	4	4	4	5	4	4	4	4	4	5	5	4	4
	Plant Embryogenesis-Spermidine|Putrescine Metabolism	7	7	6	6	7	8	7	7	6	6	6	7	7	6	6	7	7	6	6	7	7	7	7	7	8	6	6	7	7	6	7	7	6	7	6	7	7	7	7	5	6	7	5	8	7	6	7	7
	Plant Germination-H2S Production	14	14	14	14	14	15	14	14	14	14	14	14	15	14	14	15	14	14	14	14	14	14	14	14	15	14	16	14	15	14	15	14	14	14	15	15	15	14	14	14	14	15	14	14	14	14	15	14
	Plant Germination-Taurine Derivate Production	2	2	2	2	2	2	2	2	2	2	2	2	2	2	2	2	2	2	2	2	2	2	2	2	2	2	2	2	2	2	2	2	2	2	2	2	2	2	2	2	2	2	2	2	2	2	2	2
	Plant Germination-Vitamin B9|Folate Production	8	8	7	8	7	7	8	8	8	8	7	8	7	9	8	7	8	8	7	8	8	8	8	9	8	7	8	8	7	7	8	7	7	8	7	8	8	7	8	7	8	7	7	8	8	7	7	8
	Plant Lignin Degradation|Ligninases	2	2	2	2	2	2	2	2	2	2	2	2	2	2	2	2	2	2	2	2	2	2	2	2	2	2	2	2	2	2	2	2	2	2	2	2	2	2	2	2	2	2	2	2	2	2	2	2
	Plant Membrane Lipid Degradation	4	4	4	4	4	4	4	4	4	4	4	4	4	4	5	4	4	4	4	4	4	4	4	4	4	4	4	4	4	4	4	4	4	4	4	4	4	4	5	4	4	4	4	4	4	4	4	4
	Plant Signal-Acetoin|2|3-butanediol Volatile Metabolism	3	3	3	3	3	3	3	3	3	3	3	3	3	3	3	3	3	3	3	3	3	3	3	3	3	3	3	3	3	3	3	3	3	3	3	3	3	3	3	3	3	3	3	4	3	3	3	3
	Plant Signal-Carnitine Metabolism	1	1	1	1	1	1	1	1	1	1	1	1	1	1	1	1	1	1	1	1	1	1	1	1	1	1	1	1	1	1	1	1	1	1	1	1	1	1	1	1	1	1	1	1	1	1	1	1
	Plant Signal-Hydrogen Cyanide Volatile Metabolism	3	3	3	3	3	3	3	3	3	3	3	3	3	3	3	3	3	3	3	3	3	3	3	3	3	3	3	3	3	3	3	3	3	3	3	3	3	3	3	3	3	3	3	3	3	3	3	3
	Plant Signal-Hydroxyaceton Volatile Metabolism	1	1	1	1	1	1	1	1	1	1	1	1	1	1	1	1	1	1	1	1	1	1	1	1	1	1	1	1	1	1	1	1	1	1	1	1	1	1	1	1	1	1	1	1	1	1	1	1
	Plant Signal-Phospolipid Metabolism	12	11	12	11	12	12	11	11	12	11	12	11	12	11	11	12	11	11	12	12	11	11	12	12	11	12	12	11	12	12	11	12	11	12	11	11	11	12	11	11	12	11	11	12	11	12	12	11
	Plant Signal-Sulfuric Volatile Metabolism	9	9	9	9	10	9	9	9	9	9	11	9	9	9	9	9	10	9	10	9	9	9	9	9	9	9	9	9	9	11	9	9	9	9	9	9	9	9	10	11	10	9	11	9	9	9	9	9
	Plant Signal-Terpenoid Derivate Metabolism	4	4	4	4	4	4	4	4	4	4	4	4	4	4	5	4	4	4	4	4	4	4	4	4	4	4	5	4	4	4	4	4	4	4	4	4	4	4	4	4	4	4	4	4	4	4	4	4
	Plant Signal-Ubiquinone|Coenzyme Q Metabolism	13	13	15	14	15	13	13	13	15	14	12	13	13	14	14	14	14	14	14	13	13	13	13	14	14	15	14	14	14	12	13	13	14	14	13	13	13	13	13	14	14	14	14	13	13	15	13	13
	Plant Signal-Volatile Related Metabolism	7	7	8	7	8	8	7	7	8	7	7	7	7	7	7	7	8	7	8	7	7	7	7	7	8	8	7	7	7	6	7	7	8	7	7	7	7	7	7	6	7	7	6	7	7	8	7	7
	Plant Vitamin B12|Cobalamin Metabolism	16	16	16	16	16	16	16	16	16	17	16	16	16	16	16	16	16	16	16	16	16	16	16	16	16	16	16	16	16	16	16	16	16	16	16	16	16	16	16	17	16	16	17	16	16	16	16	16
	Plant Vitamin B1|Thiamin Metabolism	7	8	8	7	7	7	7	7	7	7	7	7	7	7	7	7	7	7	8	8	7	7	8	7	7	8	7	7	7	7	7	8	7	10	8	7	8	8	8	7	7	7	7	7	7	8	7	7
	Plant Vitamin B2|Riboflavin Metabolism	4	4	4	4	4	4	4	4	4	4	4	4	4	4	4	4	4	4	4	4	4	4	4	4	4	4	4	4	4	4	4	4	4	4	4	4	4	4	4	4	4	4	4	4	4	4	4	4
	Plant Vitamin B5|Pantothenic Acid|Co Factor Metabolism	12	12	12	12	13	12	12	12	12	12	12	12	12	12	12	12	12	12	12	13	12	12	13	12	12	13	12	11	12	12	12	12	12	12	12	12	12	12	12	12	12	12	12	12	12	12	12	12
	Plant Vitamin B6|Pyridoxine|Pyridoxal|Pyridoxamine Metabolism	5	5	5	5	5	5	5	5	5	5	5	5	5	5	5	5	5	5	5	5	5	5	5	5	5	5	5	5	5	5	5	5	5	5	5	5	5	5	5	5	5	5	5	5	5	5	5	5
	Plant Vitamin B9|Folate Metabolism	5	5	5	5	5	5	5	5	5	5	5	5	6	5	5	5	5	5	5	6	5	5	6	5	5	5	5	5	5	5	5	6	5	5	5	5	5	5	6	5	5	5	5	5	5	5	6	5
	Plant Vitamin C|Ascorbic Acid Metabolism	1	1	1	2	2	1	1	2	1	1	1	2	2	1	2	2	1	2	1	2	1	1	2	2	2	1	2	1	2	1	2	2	2	1	1	1	2	2	2	1	2	2	1	1	1	1	2	1
	Plant Vitamin E Metabolism	3	2	2	2	2	2	3	3	3	3	3	3	3	3	2	2	3	2	3	3	3	3	3	3	3	2	2	3	2	3	3	3	2	3	2	2	3	3	3	3	3	3	3	3	3	2	2	3
	Plant Vitamin K Metabolism	5	5	4	4	4	4	4	5	5	4	4	5	5	5	3	5	3	6	5	6	4	4	6	4	4	4	3	5	5	4	5	6	4	4	5	5	5	5	6	5	6	5	5	7	5	4	6	4
	Plant Vitamin Related Heme Metabolism	11	11	11	10	11	11	11	11	12	12	12	11	11	12	10	11	10	10	11	12	11	11	12	11	11	11	10	11	11	12	11	12	10	12	12	12	11	11	12	10	10	11	10	11	11	11	11	11
	Plant Vitamin-Molybdenum Cofactor Metabolism	13	13	13	13	13	13	13	13	13	13	13	13	13	13	13	13	13	13	13	13	13	13	13	14	13	13	13	13	13	13	13	13	13	13	13	13	13	13	13	13	13	13	13	13	13	13	13	13
	Putative-Cell Fate Control	9	8	9	8	9	10	8	7	9	9	7	9	7	9	7	9	7	7	9	7	8	8	7	7	9	9	8	8	9	8	8	8	7	9	8	8	8	7	8	7	7	8	7	9	9	9	7	8
	Putative-Energy Metabolism	8	8	9	7	9	8	10	8	8	9	8	8	8	8	7	8	7	7	8	8	11	10	8	7	8	9	8	8	8	8	8	9	7	7	8	8	8	8	8	7	7	8	7	8	8	8	8	10
	Putative-Environmental Rythmics Signalling	2	2	2	2	2	2	2	2	2	2	2	2	2	2	2	2	2	2	2	2	2	2	2	2	2	2	2	2	2	2	2	2	2	2	2	2	2	2	2	3	2	2	3	2	2	2	2	2
	Putative-Lipid Metabolism|Oxidoreductase	1	1	1	1	1	1	1	1	1	1	1	1	1	1	1	1	1	1	1	1	1	1	1	1	1	1	1	1	1	1	1	1	1	1	1	1	1	1	1	1	1	1	1	1	1	1	1	1
	Putative-Oxidoreductase Activity	4	4	4	4	4	4	4	4	3	3	4	4	5	3	4	5	5	4	5	4	4	4	4	3	4	4	4	3	5	4	4	4	4	3	3	3	4	3	4	4	4	4	4	4	3	4	3	4
	Putative-Polycyclic Aromatic Hydrocarbon Catabolism	4	4	4	4	4	4	4	4	4	4	4	4	4	4	4	4	4	4	4	4	4	4	4	4	4	4	4	4	4	4	4	4	4	4	4	4	4	4	4	4	4	4	4	4	4	4	4	4
	Putative-Transcriptional Control	4	4	4	4	4	4	4	4	4	4	4	4	4	4	4	4	4	4	4	4	4	4	4	4	4	4	4	4	4	4	4	4	4	4	4	4	4	4	4	4	4	4	4	4	4	4	4	4
	Root Colonization By Nodulation	18	18	21	15	22	21	16	18	17	16	18	20	19	17	16	17	12	17	19	17	16	16	17	18	20	22	17	19	17	17	20	17	15	17	21	15	20	20	19	12	17	19	12	18	18	21	18	16
	Root Colonization Facilitating Protein	5	6	5	6	8	5	6	8	6	6	6	5	5	5	7	6	8	9	6	8	7	6	6	6	6	6	5	5	6	6	5	5	9	6	8	6	5	9	5	5	6	5	5	5	5	5	6	6
	Root Colonization-Vitamin B3|Niacin Metabolism	9	8	9	8	9	9	9	9	9	9	9	9	9	9	9	9	9	9	9	9	9	9	9	9	9	9	8	9	9	9	9	9	10	9	9	9	9	9	9	9	9	9	9	9	9	9	9	9
	Root Colonization-Vitamin B7|Biotin Metabolism	15	16	17	17	17	17	15	15	15	15	17	15	17	15	18	16	16	17	16	17	15	15	16	17	16	18	17	17	16	17	16	16	18	16	17	16	15	18	18	17	16	16	17	15	16	18	18	15
	S-Asssimilation-Sulfur Metabolism	11	12	11	12	12	11	12	11	13	13	12	11	11	13	11	11	12	12	11	11	12	12	11	11	11	11	11	12	11	12	11	11	11	13	8	11	12	11	11	12	11	11	12	11	11	11	11	12
	Stress Signalling Proteins	95	97	93	95	98	98	96	94	94	93	93	96	97	95	95	95	95	99	96	96	95	95	95	95	99	94	95	97	94	93	95	96	95	101	93	95	95	98	98	91	94	95	89	97	95	95	94	96
	Surface Adhesion	19	19	19	19	19	19	18	20	19	19	19	19	19	19	19	19	23	19	19	20	18	18	19	20	19	20	19	19	19	19	20	20	19	20	19	19	19	19	19	19	19	21	19	19	19	19	19	18
	Surface Attachment-LPS|Lipid|IVa Metabolism	24	24	23	22	23	24	24	24	24	25	21	22	24	24	22	23	22	22	22	23	24	24	23	22	24	23	23	22	23	21	22	23	22	24	25	25	24	23	22	22	23	22	22	24	23	23	22	24
	Surface Attachment-Lipo-|Colanic Acid Metabolism	3	3	3	2	3	3	3	3	3	3	3	3	2	3	3	3	4	2	3	3	3	3	3	2	3	3	3	2	3	3	3	3	3	3	2	3	3	2	3	3	3	3	3	3	3	3	3	3
	Surface Attachment-Lipo-|Teichoic Acid Metabolism	1	2	1	1	1	1	2	1	1	1	2	1	1	1	1	2	1	1	1	2	2	2	2	1	2	1	1	1	2	1	1	1	1	1	1	1	1	3	2	1	1	1	1	1	2	1	2	2
	Surface Attachment-Lipo-|Teichuronic Acid Metabolism	1	0	0	0	0	0	1	1	0	0	0	0	0	0	0	0	0	0	0	0	1	1	0	0	0	0	0	0	0	0	0	0	0	0	0	0	0	0	0	0	0	0	0	1	0	0	0	1
	Surface Attachment-Poly-N-Acetyl-Glucosamine Metabolism	3	3	3	3	3	3	3	3	3	3	3	3	3	3	3	3	3	3	3	3	3	3	3	3	3	3	3	3	3	3	3	3	3	3	3	3	3	3	3	3	3	3	3	3	3	3	3	3
	Xenobiotic Atrazine|Derivate Degradation	9	8	10	7	10	10	9	9	8	9	9	9	10	8	8	10	8	8	9	10	9	9	10	9	8	10	8	9	10	9	10	10	7	9	7	9	10	10	9	8	7	9	8	9	8	10	9	9
	Xenobiotic Benzoate|Derivate Degradation	7	7	9	7	8	9	8	7	7	6	7	8	8	8	8	8	7	7	9	8	8	8	8	8	7	8	7	7	7	6	8	7	7	6	8	7	7	8	7	8	7	7	8	7	7	8	7	8
	Xenobiotic Caprolactam|Derivate Degradation	1	1	1	1	1	1	1	1	1	1	1	1	1	1	1	1	1	1	1	1	1	1	1	1	1	1	1	1	1	1	1	1	1	1	1	1	1	1	1	1	1	1	1	1	1	1	1	1
	Xenobiotic Cyanate Detoxification	2	2	2	2	2	2	2	2	2	2	2	2	2	2	2	2	2	2	2	2	3	2	2	2	2	2	2	2	2	2	2	2	2	2	2	2	2	2	2	2	2	2	2	2	2	2	2	2
	Xenobiotic Degradation Of Organo-Phosphorus Insecticides	6	7	6	6	5	6	6	6	6	5	6	6	6	6	6	4	5	6	5	6	6	6	6	5	6	6	6	6	4	6	6	5	6	6	5	5	6	6	6	5	6	5	5	6	6	6	6	6
	Xenobiotic Degradation Of Other Nitro-Compounds	7	7	6	6	6	7	6	7	7	7	6	7	6	7	6	6	6	7	6	6	6	6	6	6	7	6	7	7	6	6	6	6	7	7	5	6	7	6	6	7	6	7	7	7	7	6	6	6
	Xenobiotic Detoxification By Transport	5	5	5	5	5	5	4	5	5	5	5	6	6	5	7	6	8	5	8	5	4	4	5	6	5	5	5	5	6	5	6	8	5	5	5	5	6	6	6	7	5	5	7	5	5	5	5	4
	Xenobiotic Dioxin|Derivate Degradation	2	3	2	1	2	2	2	2	3	2	3	2	2	3	2	2	3	1	1	2	2	2	2	2	2	1	2	3	1	3	3	2	1	2	4	2	3	2	2	2	2	3	2	2	3	1	1	2
	Xenobiotic Hydrocarbons|Oil Degradation	11	14	13	12	12	14	11	11	13	15	12	13	14	12	12	13	10	13	14	12	11	11	12	12	12	13	13	11	12	12	13	14	12	13	17	14	14	13	13	12	12	13	12	12	12	12	10	11
	Xenobiotic Naphtalene|Derivate Degradation	1	1	1	1	1	1	1	1	1	1	1	1	1	1	1	1	1	1	1	1	1	1	1	1	1	1	1	1	1	1	1	1	1	1	1	1	1	1	1	1	1	1	1	1	1	1	1	1
	Xenobiotic Polycyclic Aromatic Hydrocarbon Degradation	0	0	0	0	0	0	0	0	0	0	0	0	0	0	0	0	0	0	0	0	0	0	0	0	0	0	0	0	0	0	0	0	0	0	0	0	0	0	0	0	0	0	0	0	0	0	0	0
	Xenobiotic Steroid|Derivate Degradation	2	4	3	3	4	4	4	3	5	4	4	3	4	5	4	4	3	3	5	4	4	4	4	5	4	3	4	4	4	4	3	5	3	5	4	5	4	4	5	3	3	4	3	2	4	3	4	4
	Xenobiotic Styrene|Derivate Degradation	6	5	6	6	6	6	5	6	6	7	6	5	5	7	6	5	6	6	5	5	5	5	5	5	5	6	6	5	5	6	6	5	6	6	6	6	5	5	6	6	6	6	6	6	5	6	5	5
	Xenobiotic Tolulene|Derivate Degradation	9	10	9	10	9	9	9	9	8	8	9	9	10	8	10	10	10	10	9	9	10	9	9	10	8	10	9	8	10	9	9	9	10	8	9	8	9	10	10	10	9	9	10	9	8	9	10	9
	Xenobiotic Xylene|Derivate Degradation	1	1	1	1	1	1	1	1	1	1	1	1	1	1	1	1	1	1	1	1	1	1	1	1	1	1	1	1	1	1	1	1	1	1	1	1	1	1	1	1	1	1	1	1	0	1	1	1
Type_6	Acidic Stress-Evg-Emr System	7	6	7	7	7	8	7	7	7	7	7	6	6	7	8	7	7	7	7	6	7	7	6	6	7	7	7	7	7	7	7	6	7	7	7	7	7	6	6	7	7	7	7	7	7	9	7	7
	Acidic Stress-Low Acid Signalluing	2	2	2	2	2	2	2	2	2	2	2	2	2	2	2	2	2	2	2	2	2	2	2	2	2	2	2	2	2	2	2	2	2	2	2	2	2	2	3	2	2	2	2	2	2	2	2	2
	Acidic Stress-Ornithine Lipids Biosynthesis	2	2	2	2	2	2	2	2	2	2	2	2	2	2	2	2	2	2	2	2	2	2	2	2	2	2	2	2	2	2	2	2	2	2	2	2	2	2	2	2	2	2	2	2	2	2	2	2
	Adaption To PIS-2-Methylene-4-Butyrolactone Degradation	1	1	1	1	1	1	1	1	1	1	1	1	1	1	1	1	1	1	1	1	1	1	1	1	1	1	1	1	1	1	1	1	1	1	1	1	1	1	1	1	1	1	1	1	1	1	1	1
	Adaption To PIS-Curcumin Degradation	2	2	2	2	2	2	2	2	2	2	2	2	2	2	2	2	2	2	2	2	2	2	2	2	2	2	2	2	2	2	2	2	2	2	2	2	2	2	2	2	2	2	2	2	2	2	2	2
	Adaption To PIS-Gallate Degradation Pathway	0	1	0	0	0	0	0	0	0	0	0	0	0	0	0	0	0	0	1	0	0	0	0	0	0	0	0	0	0	0	0	0	0	0	0	0	0	0	0	0	0	0	0	0	0	0	0	0
	Adaption To PIS-Hca Degradation-Vanillin Intermedieate	0	0	1	0	1	1	0	0	0	0	0	0	0	0	0	0	0	0	0	0	0	0	0	0	0	1	0	0	0	0	0	0	0	0	0	0	0	0	0	0	0	0	0	0	0	1	0	0
	Adaption To PIS-Salicylic Acid Degradation	3	4	4	4	4	4	3	3	5	5	6	3	3	5	3	4	4	3	4	3	3	3	3	3	3	4	2	4	4	4	3	4	4	5	3	3	3	3	4	3	3	3	3	3	3	4	3	3
	Adaption To PIS-Signal Senisng	2	2	2	2	2	2	2	2	2	2	2	2	2	2	2	2	2	2	2	2	2	2	2	2	2	2	2	2	2	2	2	2	2	2	2	2	2	2	2	2	2	2	2	2	2	2	2	2
	Antimony Resistance System	4	4	4	4	4	4	4	6	6	7	4	4	4	6	4	4	4	4	4	4	4	4	4	4	4	4	4	4	4	4	4	4	4	6	4	4	4	6	4	4	4	4	4	7	4	4	6	4
	Antimony Resistance-Antimony Homeostasis	1	1	1	1	1	1	1	1	1	1	1	1	1	1	1	1	1	1	1	1	1	1	1	1	1	1	1	1	1	1	1	1	1	1	1	1	1	1	1	1	1	1	1	1	1	1	1	1
	Antiprotistal-Pentalenolactone Metabolism	0	0	0	0	0	0	0	0	1	1	1	0	0	1	0	0	0	0	0	0	0	0	0	0	0	0	0	0	0	1	0	0	0	1	0	0	0	0	0	0	0	0	0	0	0	0	0	0
	Arsenic Resistance System	3	3	3	3	3	3	3	4	4	4	3	3	3	4	3	3	3	3	3	3	3	3	3	3	4	3	3	4	3	3	3	3	3	4	3	3	3	4	3	3	3	3	3	3	4	3	4	3
	Arsenic Resistance-Arsenic Transport	1	1	1	1	1	1	1	1	1	1	1	1	1	1	1	1	2	1	1	1	1	1	1	1	1	1	1	1	1	1	1	1	1	1	1	1	1	1	1	1	1	1	1	1	1	1	1	1
	Bactericidal-Amycin Derivate Biosynthesis	1	1	1	1	1	1	1	1	1	1	1	1	1	1	1	1	1	1	1	1	1	1	1	1	1	1	1	1	1	1	0	1	1	1	1	1	1	1	1	1	1	1	1	1	1	1	1	1
	Bactericidal-Ansamitocin|Rifamycin Metabolism	0	0	0	0	0	0	0	0	0	0	0	0	0	0	0	0	0	0	0	0	1	0	0	0	0	0	0	0	0	0	0	0	0	0	0	0	0	0	0	0	0	0	0	0	0	0	0	0
	Bactericidal-Aurachin Metabolism	3	3	3	3	3	3	3	3	3	3	3	3	3	3	3	3	3	3	3	3	3	3	3	3	3	3	3	3	3	3	3	3	3	3	3	3	3	3	3	3	3	3	3	3	3	3	3	3
	Bactericidal-Bacillaene|Macrolactin|Difficidin Metabolism	0	0	0	0	0	0	0	0	0	0	0	1	0	0	0	0	0	0	0	0	0	0	0	0	1	0	0	1	0	0	0	0	0	0	0	0	1	0	0	0	0	0	0	0	1	0	0	0
	Bactericidal-Bacteriocins|Colicins	2	2	2	2	2	2	2	2	2	2	2	2	2	2	2	2	2	2	2	2	2	2	2	2	2	2	2	2	2	2	2	2	2	2	2	2	2	2	2	2	2	2	2	2	2	2	2	2
	Bactericidal-Bacteriocins|Lantibioitc|Nisin	0	0	0	0	0	0	0	0	0	0	0	0	0	0	0	0	0	0	0	0	0	0	0	0	0	0	0	0	0	0	0	0	0	0	0	0	0	0	0	0	0	0	0	0	0	0	0	0
	Bactericidal-Carbapenem Metabolism	1	1	1	1	1	1	1	1	1	1	1	1	1	1	1	1	1	1	1	1	1	1	1	1	1	1	1	1	1	1	1	1	1	1	1	1	1	1	1	1	1	1	1	1	1	1	1	1
	Bactericidal-Cycloserine Metabolism	1	1	1	1	1	1	1	1	1	1	1	1	1	1	1	1	1	1	1	1	1	1	1	1	1	1	1	1	1	1	1	1	1	1	1	1	1	1	1	1	1	1	1	1	1	1	1	1
	Bactericidal-Erythromycin Metabolism	0	1	0	1	0	0	0	0	0	0	0	0	0	0	0	0	0	1	0	0	0	0	0	0	0	0	0	0	0	0	0	0	0	0	0	0	0	0	0	0	0	0	0	0	0	0	0	0
	Bactericidal-Gramicidin Metabolism	3	3	3	2	3	3	3	2	3	3	3	3	3	2	2	3	2	2	3	3	3	3	3	3	3	3	3	3	3	3	3	3	3	3	2	3	3	3	3	2	3	3	2	3	3	3	3	3
	Bactericidal-Hydroxybenzoate Metabolism	1	1	1	1	1	1	1	1	1	1	1	1	1	1	1	1	1	1	1	1	1	1	1	1	1	1	1	1	1	1	1	1	1	1	1	1	1	1	1	1	1	1	1	1	1	1	1	1
	Bactericidal-Lividomycin Metabolism	0	0	0	0	0	0	0	0	0	0	0	1	0	0	0	0	0	0	0	0	0	0	0	0	0	0	0	0	0	0	1	0	0	0	0	0	0	0	0	0	0	0	0	0	0	0	0	0
	Bactericidal-Megalomycin Metabolism	0	0	0	0	0	0	0	0	0	0	0	0	0	0	0	0	0	0	0	0	0	0	0	0	0	0	0	0	0	0	0	0	0	0	0	0	0	0	0	0	0	0	0	0	0	0	0	0
	Bactericidal-Penicillin Metabolism	2	2	2	2	2	2	2	2	2	2	2	2	2	2	2	2	3	2	2	2	2	2	2	2	2	2	2	2	2	2	2	2	2	2	2	2	2	2	2	3	2	2	3	2	2	2	2	2
	Bactericidal-Prodigiosin Metabolism	25	24	23	25	24	24	24	23	23	23	21	25	24	22	25	22	27	25	22	25	24	24	25	24	24	23	24	24	22	21	25	23	27	20	22	23	23	22	26	25	26	24	25	28	25	23	23	24
	Bactericidal-Pyoluteorin Metabolism	1	1	1	1	1	1	1	1	1	1	1	1	1	1	2	1	2	1	1	1	1	1	1	1	1	1	1	1	1	1	1	1	1	1	2	1	1	1	1	2	1	1	2	1	1	1	1	1
	Bactericidal-Sideromycins|Microcins	13	13	13	13	13	13	13	13	13	13	9	13	13	13	13	13	13	13	13	13	13	13	13	13	13	13	13	14	13	9	13	13	13	13	9	13	13	13	13	13	13	13	13	13	13	13	13	13
	Bactericidal-Spermidine|Putrescine Metabolism	14	14	14	14	14	14	18	14	18	18	14	14	14	18	14	14	14	14	14	14	18	18	14	14	14	14	14	14	14	14	14	14	14	18	14	14	14	14	14	14	14	14	14	14	14	14	14	18
	Bactericidal-Toxoflavin Metabolism	1	1	0	1	0	1	1	1	1	1	1	1	1	1	1	0	1	1	0	1	1	1	1	1	1	0	1	1	0	1	1	1	1	1	1	1	1	1	1	1	1	1	1	1	1	0	1	1
	Bactericidal-Type II Polyketide-Actinorhodin|Medermycin|Dihydrokalafungin Metabolism	0	2	0	0	0	1	1	0	0	0	0	0	0	0	0	0	0	0	0	1	1	1	1	0	1	0	0	0	0	0	1	0	0	0	0	0	1	0	1	1	0	1	1	0	0	0	0	1
	Bactericidal-Type II Polyketide-Mithramycin Metabolism	1	1	1	1	1	1	1	1	1	1	1	1	0	1	1	1	1	1	1	1	1	1	1	0	0	1	1	0	1	1	1	1	1	1	1	0	1	0	1	1	1	0	1	1	0	1	0	1
	Bactericidal-Type II Polyketide-Oxy-|Chlor-|Tetracycline Metabolism	3	3	3	3	3	3	3	3	3	3	3	3	3	3	3	3	3	3	3	3	3	3	3	3	3	3	3	3	3	3	3	3	3	3	3	3	3	3	3	3	3	3	3	3	3	3	3	3
	Bactericidal-Type II Polyketide-Tetracenomycin Metabolism	0	0	1	0	1	1	0	0	0	0	0	0	0	0	0	0	0	0	0	0	0	0	0	0	0	1	0	0	0	0	0	0	0	0	0	0	0	0	0	0	0	0	0	0	0	1	0	0
	Bactericidal-Tyrocidin A Metabolism	0	0	0	0	0	0	0	0	0	0	0	0	0	0	0	0	0	0	0	0	0	0	0	0	0	0	0	0	0	0	0	0	0	0	0	0	0	0	0	0	0	0	0	0	0	0	0	0
	Bactericidal-Vancomycin Metabolism	2	1	1	1	1	1	1	1	2	2	1	1	1	2	1	1	1	1	1	1	1	1	1	1	2	1	1	2	1	1	2	1	1	2	1	1	1	1	1	1	1	1	1	2	2	1	1	1
	Biotic Stress Resistance-1|2-propandiol Volatile Biosynthesis	1	1	1	1	1	1	0	0	0	0	0	1	1	0	1	1	1	1	1	1	0	0	1	1	1	1	1	1	1	0	1	1	1	0	0	0	1	1	1	1	1	0	1	1	1	1	1	0
	Biotic Stress Resistance-Acetoin|2|3-butanediol Volatile Biosynthesis	1	1	1	2	1	1	1	2	1	1	2	1	2	1	2	1	1	2	1	2	1	1	2	2	1	1	2	1	1	1	1	2	2	2	2	1	1	3	2	2	2	1	2	2	1	1	2	1
	Biotic Stress Resistance-Alcohol|Ketone Volatile Metabolism	6	6	6	6	6	6	6	6	6	6	6	6	6	6	6	6	6	6	6	6	6	6	6	6	6	6	6	6	6	6	6	6	6	6	6	6	6	6	6	6	6	6	6	6	6	6	6	6
	Biotic Stress Resistance-Bacilysin Metabolism	1	1	1	1	1	1	1	1	1	1	1	1	1	1	1	1	1	1	1	1	1	1	1	1	1	1	1	1	1	1	1	1	1	1	1	1	1	1	1	1	1	1	1	1	1	1	1	1
	Biotic Stress Resistance-Hydroxyacetone Volatile Biosynthesis	1	1	1	1	1	1	1	1	1	1	1	1	1	1	1	1	1	1	1	0	1	1	0	1	1	1	1	1	1	1	1	1	1	1	1	1	1	1	1	1	1	1	1	1	1	1	1	1
	Biotic Stress Resistance-Phenazine Biosynthesis	0	0	1	0	1	1	0	0	0	0	0	0	0	0	0	0	0	0	0	0	0	0	0	0	0	1	0	0	0	0	0	0	0	0	0	0	0	0	0	0	0	0	0	0	0	1	0	0
	Biotic Stress Resistance-Phenazine-1-Carboxylic Acid Biosynthesis	10	11	10	10	10	10	10	10	10	10	10	10	10	10	10	10	10	10	10	10	10	10	10	10	10	10	10	10	10	10	10	10	10	10	10	10	10	10	10	10	10	10	10	10	10	10	10	10
	Biotic Stress Resistance-Volatile Related Fatty Acid Metabolism	21	21	21	21	21	21	21	21	21	19	21	21	21	19	21	21	21	21	21	21	21	21	21	21	21	21	21	19	21	19	21	21	23	19	19	19	21	21	21	21	21	21	21	22	21	21	21	21
	Bismuth Resistance-Bismuth Homeostasis	2	2	2	1	2	2	2	2	2	2	1	2	2	2	1	2	1	1	2	2	2	2	2	2	2	2	1	2	2	2	2	2	1	2	2	2	2	2	2	1	1	2	1	2	2	2	2	2
	CE-Bacterial Fitness-3-Phenylpropionic Acid	2	2	2	2	2	2	2	2	1	2	2	2	2	2	2	1	2	2	2	2	2	2	2	2	2	2	2	2	1	2	2	2	2	2	1	1	2	1	2	2	2	1	2	2	2	2	2	2
	CE-Bacterial Fitness-3-Phenylpropionic Acid|Cinnamic Acid Resistance	1	1	1	2	1	1	1	1	1	2	2	2	1	2	3	1	1	2	1	1	1	1	1	1	2	1	2	2	1	2	2	2	1	1	1	1	2	1	1	1	2	2	1	1	2	1	2	1
	CE-Bacterial Fitness-Abiti-Abitii Toxin-Antitoxin System	0	0	0	0	0	0	0	0	0	0	0	0	0	0	0	0	0	0	0	0	0	0	0	0	0	0	0	0	0	0	0	0	0	0	0	0	0	0	0	0	0	0	0	0	0	0	0	0
	CE-Bacterial Fitness-AbrB Toxin-Antitoxin System	2	2	3	3	4	3	2	2	3	3	2	2	2	3	3	3	2	3	3	2	2	2	2	2	2	3	3	2	3	2	2	2	3	3	2	2	2	2	2	2	3	2	2	2	2	3	2	2
	CE-Bacterial Fitness-Aerobic Respiration|Oxidative Phosphorylation	28	28	28	28	28	28	28	28	29	28	28	28	28	28	28	28	28	28	28	30	28	28	28	30	29	28	28	29	28	28	28	30	29	28	28	28	28	28	28	28	28	28	28	28	28	28	28	28
	CE-Bacterial Fitness-Aminoglycosides Resistance-Streptomycin|Kanamycin|Amikacin	3	3	3	4	3	3	3	3	3	3	3	3	3	3	3	3	3	3	3	4	3	3	4	3	3	3	4	3	3	3	3	3	4	3	4	3	3	3	3	4	3	3	4	3	3	3	3	3
	CE-Bacterial Fitness-Anaerobic Signalling	2	2	2	2	2	2	2	2	1	1	2	2	2	1	2	2	2	2	2	2	2	2	2	2	2	2	2	2	2	1	2	2	2	2	1	2	2	2	2	1	2	2	1	2	2	2	2	2
	CE-Bacterial Fitness-Antimicrobial Compund Ressitance-Acetoin|2|3-butanediol Synthesis	2	2	2	2	2	2	2	2	2	2	2	2	2	2	2	2	2	2	2	2	2	2	2	2	2	2	2	2	2	2	2	2	2	2	2	2	2	2	2	2	2	2	2	2	2	2	2	2
	CE-Bacterial Fitness-Bacimethrin|Cf3-hmp Detoxification	1	1	1	1	1	1	1	1	1	1	1	1	1	1	1	1	1	1	1	1	1	1	1	1	1	1	1	1	1	1	1	1	1	1	1	1	1	1	1	1	1	1	1	1	1	1	1	1
	CE-Bacterial Fitness-Bacterial Toxins	2	1	2	3	2	2	2	3	2	2	2	1	1	2	2	2	2	3	2	3	2	2	3	2	1	2	3	2	2	2	1	3	4	2	1	2	2	2	3	2	2	2	2	2	1	2	2	2
	CE-Bacterial Fitness-Beta-Lactam Resistance	10	11	11	10	10	11	10	10	11	10	10	10	10	11	10	11	11	10	11	11	10	10	11	11	10	10	10	10	10	10	10	11	10	13	12	10	11	12	11	10	10	10	10	12	10	10	10	10
	CE-Bacterial Fitness-BrnA-BrnT Toxin-Antitoxin System	5	5	4	4	5	5	3	3	3	4	5	4	3	3	3	4	3	4	5	5	3	3	5	3	4	4	4	5	4	5	5	5	3	4	4	5	5	3	5	4	4	5	4	5	5	4	3	3
	CE-Bacterial Fitness-Catechol Resistance	5	5	5	5	5	5	5	5	4	4	5	5	5	4	5	5	5	5	5	4	5	5	4	4	4	5	4	4	5	5	5	4	5	4	4	4	5	4	4	5	5	5	5	5	4	5	4	5
	CE-Bacterial Fitness-CcdB-CcdA Toxin-Antitoxin System	0	0	0	0	0	0	0	0	0	0	0	0	0	0	0	0	0	0	0	1	0	0	0	0	0	1	0	0	0	0	0	0	0	0	0	0	0	1	0	0	0	0	0	0	0	0	0	0
	CE-Bacterial Fitness-ChpB-ChpS Toxin-Antitoxin System	2	2	2	2	2	2	0	0	2	2	2	2	2	2	2	2	0	2	2	0	0	0	0	0	2	2	2	2	2	2	2	0	2	2	2	2	2	2	0	0	2	2	0	2	2	2	0	0
	CE-Bacterial Fitness-CptA-CptB Toxin-Antitoxin System	2	2	2	2	2	2	2	2	2	2	2	2	2	2	2	2	2	2	2	2	2	2	2	2	2	2	2	2	2	2	2	2	2	2	2	2	2	2	2	2	2	2	2	2	2	2	2	2
	CE-Bacterial Fitness-DarG-DarT Toxin-Antitoxin System	3	0	0	0	0	0	0	0	0	0	0	0	0	0	2	0	0	0	0	0	0	0	0	0	0	0	0	0	0	0	1	0	0	0	0	1	0	0	1	0	0	0	0	3	1	0	0	1
	CE-Bacterial Fitness-Doc-Phd Toxin-Antitoxin System	0	0	0	0	0	0	0	1	0	0	0	0	0	0	0	0	0	0	0	1	0	0	1	0	0	0	0	0	0	0	0	1	0	0	0	0	0	1	1	0	0	0	0	0	0	0	0	0
	CE-Bacterial Fitness-Environment-Inducible Dna Polymerases	4	3	7	3	3	4	3	4	4	3	3	3	4	7	5	3	3	6	7	5	3	3	3	4	5	5	7	3	4	6	4	4	4	8	7	6	3	7	5	3	4	3	4	6	3	5	4	3
	CE-Bacterial Fitness-Environmental Surrival-Glycogen Biosynthesis	3	3	3	3	3	3	3	3	3	3	4	3	4	3	3	3	3	3	3	3	3	3	3	2	4	3	3	3	3	4	3	4	3	3	3	4	3	2	4	3	3	5	3	3	3	3	3	3
	CE-Bacterial Fitness-FitB-FitA Toxin-Antitoxin System	1	1	4	3	1	1	1	1	2	2	2	1	1	2	1	1	3	3	1	1	1	1	1	3	1	4	1	1	1	0	0	1	1	0	2	0	1	1	1	3	1	1	3	1	1	4	3	1
	CE-Bacterial Fitness-Fosfomycin Resistance	1	1	2	1	2	1	2	2	2	2	2	2	2	2	1	1	2	2	1	3	2	2	2	2	1	2	1	1	1	2	2	1	1	3	1	1	1	1	4	1	1	1	1	1	1	2	1	2
	CE-Bacterial Fitness-Gallate Resistance	2	5	2	2	2	2	2	2	2	2	2	2	2	2	2	2	3	2	2	2	2	2	2	2	2	2	2	2	2	2	2	2	2	2	2	2	2	2	2	2	2	2	2	2	2	2	2	2
	CE-Bacterial Fitness-Gop-Beta Protein Toxin-Antitoxin System	0	0	0	0	0	0	0	0	0	0	0	0	1	0	0	0	0	0	0	0	0	0	0	0	0	0	0	0	0	0	0	0	0	0	0	2	0	0	1	0	0	2	0	0	0	0	0	0
	CE-Bacterial Fitness-HicA-HicB Toxin-Antitoxin System	1	1	2	0	1	1	1	1	2	4	1	1	2	2	1	2	1	2	2	1	1	1	1	2	0	2	0	1	2	1	0	2	0	2	0	1	1	1	2	0	2	0	0	1	0	3	1	1
	CE-Bacterial Fitness-HigB-HigA Toxin-Antitoxin System	4	5	3	4	4	3	5	7	5	5	4	4	3	5	4	4	4	4	6	7	5	5	7	7	6	3	3	6	4	3	5	7	3	5	2	4	5	4	7	5	3	5	5	4	7	3	6	5
	CE-Bacterial Fitness-HipA-HipB Toxin-Antitoxin System	1	5	3	6	2	3	2	3	1	3	6	5	0	1	6	3	7	6	3	5	3	2	5	3	6	3	2	8	3	6	8	3	7	1	2	6	8	5	3	7	7	4	7	1	5	3	3	3
	CE-Bacterial Fitness-Hydroquinone-Derivate Resistance	2	2	2	2	2	2	2	2	2	2	2	2	2	2	2	2	2	2	2	2	2	2	2	2	2	2	2	2	2	2	2	2	2	2	2	2	2	2	3	2	2	2	2	2	2	2	2	2
	CE-Bacterial Fitness-Hydroxybenzoic Acid Gallate Resistance	6	6	6	6	6	6	6	6	6	6	6	6	7	6	6	6	6	6	6	7	6	6	7	7	6	6	6	6	6	6	6	7	6	6	5	6	6	7	7	6	6	6	6	6	6	6	8	6
	CE-Bacterial Fitness-Integrases|Recombinases	4	7	4	2	4	4	2	6	0	2	8	2	3	3	1	7	6	3	2	0	4	2	2	3	5	2	4	1	3	5	9	2	2	8	4	7	2	6	1	2	2	4	3	4	4	3	2	2
	CE-Bacterial Fitness-Macrolide Resistance	5	5	6	6	5	6	5	5	5	5	5	5	5	5	5	6	5	6	6	5	5	5	5	5	5	6	5	5	6	5	5	5	6	5	5	5	5	6	5	5	5	5	5	5	5	6	6	5
	CE-Bacterial Fitness-MazF-MazE Toxin-Antitoxin System	0	0	0	0	0	0	0	0	0	0	0	0	0	0	0	0	0	0	0	0	0	0	0	1	0	0	0	0	0	0	0	0	0	0	0	0	0	0	0	0	0	0	0	0	0	0	0	0
	CE-Bacterial Fitness-MqsR-MqsA Toxin-Antitoxin System	1	1	1	1	1	1	1	2	0	0	1	1	1	1	1	1	1	1	1	1	1	1	1	1	1	1	1	1	1	1	1	1	1	1	0	1	1	1	1	1	1	1	1	1	1	1	1	1
	CE-Bacterial Fitness-Multidrug Transport-Chloramphenicol|Trimethoprin Efflux Pump BpeEF-OprC	33	31	34	34	33	33	33	32	34	34	32	34	33	34	34	34	30	37	32	32	34	33	32	33	32	37	33	32	32	32	33	30	32	34	34	33	33	32	33	35	31	34	35	35	33	32	32	33
	CE-Bacterial Fitness-Multidrug Transport-Efflux Pump AbcA	2	1	0	1	1	0	1	1	1	1	2	1	1	1	1	1	1	1	0	1	1	1	1	1	1	0	1	1	1	2	3	1	1	1	1	1	0	1	1	2	1	1	2	2	2	0	1	1
	CE-Bacterial Fitness-Multidrug Transport-Efflux Pump MepA	0	1	0	0	0	0	0	0	0	0	0	1	0	0	0	0	0	1	0	0	0	0	0	0	0	0	1	0	0	0	1	0	1	0	0	0	0	0	0	0	1	0	0	0	0	0	0	0
	CE-Bacterial Fitness-Multidrug Transport-Efflux Pump MexCD-OprJ	0	0	0	0	0	0	0	0	5	0	0	0	0	0	0	0	0	0	0	0	0	0	0	0	0	0	0	0	0	0	0	0	5	0	0	0	0	0	0	0	0	0	0	0	0	0	0	0
	CE-Bacterial Fitness-Multidrug Transport-Efflux Pump MexEF-OprN	12	12	11	11	11	11	12	12	12	12	11	12	12	12	11	12	11	13	12	13	12	12	13	12	12	11	12	12	12	11	12	12	13	12	11	12	11	11	12	12	12	12	12	14	12	11	12	12
	CE-Bacterial Fitness-Multidrug Transport-Efflux Pump MexJK-OprM	7	7	7	7	7	7	7	7	7	7	6	7	7	7	7	7	7	7	7	7	7	7	7	7	7	7	6	7	7	7	7	7	7	7	7	7	7	7	8	7	7	7	7	7	7	7	7	7
	CE-Bacterial Fitness-Multidrug Transport-Efflux Pump MexPQ-OpmE	3	3	4	3	4	4	3	3	3	3	3	3	3	3	3	3	2	3	3	3	3	3	3	3	3	4	3	3	3	3	3	3	3	3	3	3	3	3	3	3	3	3	3	3	3	4	3	3
	CE-Bacterial Fitness-Multidrug Transport-Efflux Pump Mexab-OprM	5	5	5	5	5	5	5	5	5	5	5	5	5	5	5	5	5	5	5	5	5	5	5	5	5	5	5	5	5	5	5	5	5	5	5	5	5	5	5	5	5	5	5	5	5	5	5	5
	CE-Bacterial Fitness-Multiple Antibiotic Resistance	6	5	6	6	6	6	6	6	5	5	5	5	5	5	5	6	5	5	5	5	6	6	5	5	5	6	5	5	6	5	5	5	5	5	6	5	6	5	5	5	5	6	5	6	5	6	5	6
	CE-Bacterial Fitness-Multudrug Related Regulation	3	3	3	4	3	3	3	3	3	3	3	3	3	3	3	3	4	3	3	3	3	3	3	3	3	3	4	3	3	3	3	3	3	3	3	3	3	3	3	3	3	3	3	3	3	3	3	3
	CE-Bacterial Fitness-Other Multidrug Efflux Genes	34	35	35	34	34	36	36	35	38	38	33	31	32	37	33	34	34	33	34	34	36	36	34	34	34	34	33	33	34	34	31	32	35	37	35	36	35	33	34	35	31	32	35	34	31	34	32	36
	CE-Bacterial Fitness-Oxygen Availability Signalling	0	0	0	0	0	0	0	0	0	1	0	0	0	0	0	0	0	0	0	0	0	0	0	0	0	0	0	0	0	0	0	0	0	1	0	0	0	0	0	0	0	0	0	0	0	0	0	0
	CE-Bacterial Fitness-ParE-ParD|PaaAR Toxin-Antitoxin System	2	3	3	2	2	2	5	5	2	2	3	3	2	3	3	2	3	2	2	3	5	5	3	5	3	3	3	4	2	1	3	3	3	3	1	4	3	4	5	3	3	6	3	2	5	2	5	5
	CE-Bacterial Fitness-PezT-PezA Toxin-Antitoxin System	0	0	0	0	0	0	0	0	0	0	0	0	0	0	0	0	0	0	0	0	0	0	0	0	1	0	0	1	0	0	1	0	0	0	0	0	0	0	0	0	0	0	0	0	1	0	0	0
	CE-Bacterial Fitness-Phage Exclusion	32	33	32	32	33	32	32	32	31	32	31	29	31	31	32	32	31	32	34	31	32	32	31	31	32	32	32	35	32	32	32	31	32	31	31	31	32	32	31	32	32	32	32	32	31	32	32	32
	CE-Bacterial Fitness-Phage Shock Proteins	1	1	1	1	1	1	1	1	1	1	1	1	1	1	1	1	1	1	1	1	1	1	1	1	1	1	1	1	1	1	1	1	1	1	1	1	1	1	1	1	1	1	1	1	1	1	1	1
	CE-Bacterial Fitness-Phenicol Resistance	0	0	0	0	0	0	0	0	1	1	0	0	0	1	0	0	0	0	0	0	0	0	0	0	0	0	0	0	0	0	0	0	0	1	0	0	0	0	0	0	0	0	0	0	0	0	0	0
	CE-Bacterial Fitness-Quaternary Ammonium Compound Resistance	2	2	2	2	2	2	2	2	3	3	3	2	2	3	2	2	2	2	2	2	2	2	2	2	2	2	2	2	2	3	2	2	2	3	2	2	2	2	2	2	2	2	2	2	2	2	2	2
	CE-Bacterial Fitness-Quinoline Resistance	4	4	4	4	4	4	4	4	4	4	4	4	4	4	4	4	4	4	4	4	4	4	4	4	4	4	4	4	4	4	4	4	4	4	4	4	4	4	4	6	4	4	4	4	4	4	4	4
	CE-Bacterial Fitness-Quinolone Resistance	1	1	1	0	0	1	1	1	1	1	1	1	0	1	1	1	0	1	1	0	1	1	0	0	1	1	1	1	0	1	1	0	0	1	1	1	1	0	0	1	0	1	1	1	1	0	0	1
	CE-Bacterial Fitness-RatA-RatB|YfjG-YfjF|RatAB-SsrAS System	3	3	3	3	3	3	3	3	3	3	3	3	2	2	3	3	3	3	3	3	3	3	3	3	3	3	3	3	3	3	3	3	3	3	3	3	3	3	3	2	3	3	2	3	3	3	2	3
	CE-Bacterial Fitness-RelE|StbE-relB|StbD Toxin-Antitoxin System	1	3	4	2	3	4	0	1	4	5	4	2	3	4	0	3	2	2	3	3	0	0	3	2	2	4	1	2	3	1	0	2	0	4	0	6	1	3	3	2	2	2	2	1	4	4	3	0
	CE-Bacterial Fitness-Res-Xre Toxin-Antitoxin System	2	3	3	2	2	2	2	2	2	2	2	2	2	2	2	2	2	3	2	3	2	2	3	2	1	3	2	2	2	2	2	3	3	5	2	2	3	4	3	2	2	2	2	3	2	3	2	2
	CE-Bacterial Fitness-Resistance To Antimicrobial Peptides	18	17	14	14	16	15	18	18	20	19	16	17	17	18	14	15	15	14	14	18	18	18	18	16	16	14	14	15	15	19	17	16	15	18	15	18	18	16	17	15	14	16	15	18	15	14	16	18
	CE-Bacterial Fitness-Resistance To Toxic Aminoacyl Nucleotides-1	2	2	2	2	2	2	2	2	2	2	2	2	1	2	2	2	2	2	2	1	2	2	1	2	2	2	2	2	2	2	2	2	2	2	2	2	2	2	2	2	2	2	2	2	3	2	1	2
	CE-Bacterial Fitness-Sulfur Modification Proteins	1	4	0	5	0	0	1	2	0	0	0	1	1	0	1	1	6	0	0	0	1	1	0	0	0	0	0	4	0	1	1	0	0	0	0	0	1	1	0	0	0	0	0	1	3	0	0	1
	CE-Bacterial Fitness-Surfactin Resistance	0	0	0	0	1	0	0	0	0	0	0	0	0	0	0	0	0	0	0	0	0	0	0	0	0	0	0	0	0	0	0	0	0	0	0	0	0	0	0	0	0	0	0	0	0	0	0	0
	CE-Bacterial Fitness-SymR-SymE Toxin-Antitoxin System	1	1	0	0	0	0	1	1	0	0	0	0	0	0	0	0	0	0	0	0	1	1	0	0	0	0	0	0	0	0	0	0	0	0	0	1	1	1	0	0	0	0	0	1	0	0	0	1
	CE-Bacterial Fitness-Tabtoxinine-Beta-Lactam Resistance	1	1	1	1	1	1	2	1	1	1	1	1	1	1	1	1	1	1	1	1	2	2	1	1	1	1	1	1	1	1	1	1	1	1	1	1	1	1	1	1	1	1	1	1	1	1	1	2
	CE-Bacterial Fitness-Tetracycline Resistance	2	2	2	1	2	2	1	1	1	1	1	1	2	2	2	2	1	1	2	2	1	1	2	1	1	2	2	1	2	1	1	1	1	2	1	1	1	1	1	1	2	2	1	2	2	2	2	1
	CE-Bacterial Fitness-Tox-Shh-Imm30 Toxin-Antitoxin System	6	4	3	3	5	5	6	4	3	4	4	4	3	5	6	4	3	3	3	5	4	6	5	3	7	4	3	5	4	6	7	3	3	8	4	3	4	3	3	3	3	3	3	6	3	3	3	6
	CE-Bacterial Fitness-Toxines Neutralization Ydf System	1	1	1	1	1	1	1	1	2	1	1	1	1	1	1	1	1	1	0	1	1	1	1	1	1	1	1	1	1	1	1	1	1	1	1	1	1	1	1	2	1	1	2	1	1	1	1	1
	CE-Bacterial Fitness-Transposases	10	10	9	14	15	10	11	13	12	7	9	11	14	12	13	10	14	10	17	22	12	11	23	18	10	7	12	17	10	8	10	20	10	9	4	15	9	12	25	9	14	10	9	11	15	7	13	11
	CE-Bacterial Fitness-Type I CRISPR-CAS System	4	5	4	4	4	4	4	4	5	4	4	5	4	4	4	4	4	4	4	4	4	4	4	4	4	4	4	4	4	4	5	4	4	4	4	4	5	4	4	4	4	4	4	4	4	4	5	5
	CE-Bacterial Fitness-Type I R-M System	2	2	2	5	2	3	3	6	5	3	4	6	2	6	2	2	2	7	5	3	3	3	3	5	2	2	2	2	2	2	3	5	3	5	2	5	6	2	8	2	2	6	2	2	5	3	4	4
	CE-Bacterial Fitness-Type II CRISPR-CAS System	0	0	0	0	0	0	0	0	0	0	0	0	0	0	0	0	0	0	0	0	0	0	0	0	0	0	0	0	0	0	0	0	0	0	0	0	0	0	0	0	0	0	0	0	0	0	0	0
	CE-Bacterial Fitness-Type II R-M System	3	2	4	4	2	2	2	2	2	4	3	4	3	3	4	6	4	6	3	3	2	3	5	3	4	3	5	3	4	4	5	2	1	2	6	2	5	3	2	2	3	4	4	5	3	2	2	2
	CE-Bacterial Fitness-Type II Toxin-Antitoxin System Realated Factors	10	10	10	10	10	10	10	10	10	10	10	10	10	10	10	10	10	10	10	10	10	10	10	10	10	10	10	10	10	10	10	10	10	10	10	10	10	10	10	10	10	10	10	10	10	10	10	10
	CE-Bacterial Fitness-Type III R-M System	2	2	2	1	1	2	1	1	2	1	2	2	2	2	3	1	2	1	3	3	2	1	3	2	1	2	2	3	1	2	3	3	3	2	2	1	2	5	2	2	2	1	2	3	2	2	2	3
	CE-Bacterial Fitness-Type IV Abieii Toxin-Antitoxin System	0	0	1	0	1	1	1	1	0	0	1	1	0	0	0	0	1	0	1	0	1	1	0	0	1	1	0	1	0	1	1	0	0	0	0	0	1	0	0	1	0	1	1	0	1	1	0	1
	CE-Bacterial Fitness-Type IV R-M System	3	3	5	2	2	2	1	2	3	3	3	4	1	2	3	1	1	3	7	4	2	3	4	2	4	5	3	1	1	4	5	3	3	2	2	3	4	2	2	4	3	2	3	3	2	3	2	3
	CE-Bacterial Fitness-Universal Cas Proteins	1	2	1	1	1	1	1	1	1	1	1	1	1	1	1	1	1	1	1	1	1	1	1	1	1	1	2	1	1	1	1	1	1	1	1	1	1	1	1	1	1	2	1	1	1	1	1	1
	CE-Bacterial Fitness-VapC-VapB Toxin-Antitoxin System	3	3	3	3	3	3	3	3	3	3	3	3	2	3	3	3	1	3	3	3	3	3	3	4	3	3	3	3	3	3	3	3	3	3	1	3	3	3	3	1	3	3	1	3	3	3	3	3
	CE-Bacterial Fitness-YafO-YafN Toxin-Antitoxin System	0	0	0	0	0	0	0	0	1	1	0	0	0	1	0	0	0	0	0	0	0	0	0	0	0	0	0	0	0	0	0	0	0	1	0	0	0	0	0	0	0	0	0	0	0	0	0	0
	CE-Bacterial Fitness-YafQ-DinJ Toxin-Antitoxin System	0	2	0	1	0	0	0	2	2	1	0	0	2	2	1	0	1	1	0	0	0	0	0	2	2	0	1	2	0	0	2	1	1	2	0	2	0	2	2	2	1	0	2	0	2	0	0	0
	CE-Bacterial Fitness-YdaS|YdaT Toxin-Antitoxin System	0	2	1	1	0	0	0	0	0	1	0	0	2	0	0	0	0	0	1	0	1	0	0	0	0	0	0	0	0	0	0	0	0	0	0	0	0	0	0	0	0	0	0	0	0	0	0	0
	CE-Bacterial Fitness-YoeB-YefM Toxin-Antitoxin System	0	1	0	0	0	0	0	0	0	0	1	0	2	0	0	0	0	0	0	2	0	0	2	2	1	0	0	1	0	1	1	2	0	0	0	0	0	2	2	0	0	1	0	0	1	0	2	0
	CE-Bacterial Fitness-YxiD-YxxD Toxin-Antitoxin System	0	0	0	0	0	1	0	0	0	0	0	0	0	0	0	0	0	0	1	0	0	0	0	0	0	0	1	0	0	0	1	0	0	0	0	0	1	0	1	0	0	0	0	0	0	0	0	0
	CE-Biofilm-Blue Light|Cold|Starvation Signalling	3	4	4	4	4	4	4	3	3	4	3	3	4	3	4	4	4	4	4	4	4	4	4	4	4	4	4	3	4	4	3	4	4	3	3	4	4	4	4	4	4	3	4	3	3	4	4	4
	CE-Biofilm-General Secretion Pathway	11	11	11	11	12	11	11	11	11	11	12	11	11	11	11	11	14	12	11	11	11	11	11	11	11	12	11	11	11	11	11	11	11	11	5	11	11	13	11	14	12	11	14	11	11	11	11	11
	CE-Biofilm-RST-PH|Temperature|Starvation Signalling System	1	1	1	1	1	1	1	1	1	1	1	1	1	1	1	1	1	1	1	1	1	1	1	1	1	1	1	1	1	1	1	1	1	1	1	1	1	1	1	1	1	1	1	1	1	1	1	1
	CE-Biofilm-Vps Polysaccharides	2	2	2	2	2	2	2	2	2	2	2	2	2	2	2	2	2	2	2	2	2	2	2	0	2	2	2	2	2	2	2	2	2	2	2	2	2	0	2	2	2	2	2	2	2	2	2	2
	CE-Chaperone-Usher-Secretion-Mat|Ecp Fimbriae Assembly	2	2	2	2	2	2	2	2	2	2	2	2	2	2	2	2	2	2	2	2	2	2	2	2	2	2	2	2	2	2	2	2	2	2	2	2	2	2	2	2	2	2	2	2	2	2	2	2
	CE-Chaperone-Usher-Secretion-P Pilus Assembly	0	0	0	0	0	0	0	0	0	0	0	0	0	0	0	0	0	0	0	0	0	0	0	0	0	0	0	0	0	0	0	0	0	0	0	0	0	0	0	0	0	0	0	0	0	3	0	0
	CE-EPS-Alginate Biosynthesis	12	12	12	12	12	12	12	12	12	12	13	12	13	13	12	12	12	12	12	12	12	12	12	12	12	12	12	13	12	12	12	12	12	12	12	12	12	12	12	12	12	12	12	12	12	12	12	12
	CE-EPS-Alginate External Signal Sensing	2	2	2	2	2	2	2	2	2	2	2	2	2	2	2	2	2	2	2	2	2	2	2	2	2	2	2	2	2	2	2	2	2	2	2	2	2	2	2	2	2	2	2	2	2	2	2	2
	CE-EPS-Amylovoran Biosynthesis	1	2	1	1	1	1	2	2	1	1	2	1	2	1	3	1	2	1	1	1	2	2	1	2	1	1	2	2	1	1	2	1	2	1	1	1	2	0	1	1	2	1	1	1	1	1	2	2
	CE-EPS-Capsular Colanic Acid Biosynthesis	0	0	1	0	0	0	0	0	0	0	0	0	0	0	0	0	0	0	0	2	0	0	0	2	0	0	0	0	0	0	0	2	0	0	0	0	0	0	0	0	0	0	0	0	0	0	0	0
	CE-EPS-Cellulose Biosynthesis	3	2	3	2	2	2	4	2	2	2	3	2	3	2	2	2	2	2	2	2	3	3	2	2	2	2	2	2	2	3	2	2	2	2	2	2	3	2	2	2	2	2	2	3	2	2	2	3
	CE-EPS-Colanic Acid Biosynthesis	4	3	3	3	3	3	4	4	3	3	3	3	3	3	4	3	3	3	3	3	4	4	3	2	3	3	3	3	3	3	3	3	3	3	3	3	3	2	3	3	3	3	3	4	3	3	3	4
	CE-EPS-Eps Polysaccharides Biosynthesis	0	0	0	0	0	0	0	0	0	0	0	0	0	0	2	0	0	0	0	1	0	0	1	0	1	0	0	1	0	0	0	0	0	0	0	0	0	0	0	0	0	0	0	0	1	0	0	0
	CE-EPS-Exopolysaccharide Transport-1	3	3	3	3	3	3	3	3	3	3	3	3	3	3	3	3	3	3	3	3	3	3	3	2	3	3	3	3	3	3	3	3	3	3	3	3	3	2	3	3	3	3	3	3	3	3	3	3
	CE-EPS-Galactoglucan Metabolic Pathway	2	3	3	3	3	3	2	2	2	2	2	2	2	2	2	3	3	3	3	2	2	2	2	2	2	3	3	2	3	2	2	2	2	2	2	2	2	2	2	2	3	3	2	2	2	3	2	2
	CE-EPS-Glycan Biosynthesis	1	0	0	0	0	0	1	1	0	0	0	0	1	0	0	0	0	0	0	0	1	1	0	0	1	0	0	0	0	0	0	0	1	0	0	1	1	0	0	0	0	0	0	1	0	0	1	1
	CE-EPS-Lipoteichoic Acid Metabolic Pathway	2	2	2	2	2	2	2	2	2	2	2	2	2	2	2	2	2	2	2	2	2	2	2	2	2	2	2	2	2	2	2	2	2	2	3	2	2	2	2	2	2	2	2	2	2	2	2	2
	CE-EPS-Psl Polysaccharides Biosynthesis	2	2	2	2	2	2	2	2	2	2	3	2	2	2	2	2	2	2	2	2	2	2	2	2	2	2	2	2	2	3	2	2	2	2	2	2	2	2	2	2	2	2	2	2	2	2	3	2
	CE-EPS-Pss-Related Exopolysaccharide Biosynthesis	1	1	1	1	1	1	1	1	1	1	1	1	1	1	1	1	1	1	1	1	1	1	1	1	1	1	1	1	1	1	1	1	1	1	1	1	1	1	1	1	1	1	1	1	1	1	1	1
	CE-EPS-Putative Exopolysaccharide Function-1	5	5	5	5	6	6	5	4	7	6	3	5	6	6	4	5	5	5	5	4	5	5	4	5	4	5	6	3	5	5	4	4	6	6	6	4	4	5	4	6	5	6	6	5	4	5	5	5
	CE-EPS-Rhamnosidase	0	0	0	0	0	0	0	0	0	0	0	0	0	0	1	0	0	0	0	0	0	0	0	0	0	0	0	0	0	0	0	0	0	0	0	0	0	0	0	0	0	0	0	0	0	0	0	0
	CE-EPS-Succinoglycan Metabolic Pathway	4	5	5	5	5	6	5	4	5	5	6	5	3	5	5	5	5	6	5	6	5	5	6	2	4	5	4	4	5	6	5	6	5	5	3	6	4	3	6	5	4	7	5	4	4	5	3	4
	CE-EPS-Teichoic Acid Metabolic Pathway	1	0	0	1	0	0	0	1	1	1	0	1	0	1	0	0	2	1	0	0	0	0	0	0	0	0	0	0	0	0	1	0	0	1	2	0	1	0	0	1	1	0	1	1	0	0	0	0
	CE-Other Biofilm Regulators	14	14	14	14	14	14	14	13	14	13	14	13	13	14	13	14	14	14	14	14	14	14	14	13	14	14	14	14	14	14	14	14	14	14	13	15	13	14	13	14	14	14	14	14	13	14	14	14
	CE-Other Sporulation Related Proteins	1	1	1	1	1	1	1	1	1	1	1	1	1	1	1	1	1	1	1	1	1	1	1	1	1	1	1	1	1	1	1	1	1	1	1	1	1	1	1	1	1	1	1	1	1	1	1	1
	CE-Pg Remodelling Amidase Activity	2	2	2	2	2	2	2	2	2	2	2	2	2	2	2	2	2	2	2	2	2	2	2	2	2	2	2	2	2	2	2	2	2	2	2	2	2	2	2	2	2	2	2	2	2	2	2	2
	CE-Pg Remodelling Dl-Endopeptidase Activity	0	0	1	0	0	0	0	0	0	0	0	0	1	0	0	0	0	0	0	0	0	0	0	1	0	1	0	0	0	0	0	0	0	0	0	0	0	0	0	0	0	0	0	0	0	0	0	0
	CE-Pg Remodelling Hydrolase Activity	1	1	1	1	1	1	1	1	1	1	1	1	1	1	1	1	1	1	1	1	1	1	1	1	1	1	1	1	1	1	1	1	1	1	1	1	1	1	1	1	1	1	1	1	1	1	1	1
	CE-Pg Remodelling Lipid II Flippase Activity	1	1	1	1	1	1	1	1	1	1	1	1	1	1	1	1	1	1	1	1	1	1	1	1	1	1	1	1	1	1	1	1	1	1	1	1	1	1	1	1	1	1	1	1	1	1	1	1
	CE-Pg Remodelling Modification	1	1	1	1	1	1	1	1	1	1	1	1	1	1	1	1	1	1	1	1	1	1	1	1	1	1	1	1	1	1	1	1	1	1	1	1	1	1	1	1	1	1	1	1	1	1	1	1
	CE-Pg Remodelling Related Ligases	1	1	1	1	1	1	1	1	1	1	1	1	1	1	1	1	1	1	1	1	1	1	1	1	1	1	1	1	1	1	1	1	1	1	1	1	1	1	1	1	1	1	1	1	1	1	1	1
	CE-Pg Remodelling-Carboxypeptidase Activity	5	5	5	5	5	5	5	5	5	5	5	5	5	5	5	5	5	5	5	5	5	5	5	5	5	5	5	5	5	5	5	5	5	5	5	5	5	5	5	5	5	5	5	5	5	6	5	5
	CE-Pg Remodelling-L|D-Transpeptidase Activity	3	3	3	3	3	3	3	3	3	3	3	3	3	3	3	3	3	3	3	3	3	3	3	3	3	3	3	3	3	3	3	3	3	3	3	3	3	3	3	3	3	3	3	3	3	3	3	3
	CE-Pg Remodelling-Muramoyltetrapeptide Carboxypeptidase Activity	1	1	1	1	1	1	1	1	1	1	1	1	1	1	1	1	1	1	1	1	1	1	1	1	1	1	1	1	1	1	1	1	1	1	1	1	1	1	1	1	1	1	1	1	1	1	1	1
	CE-Pg Remodelling-Murein Dd-Endopeptidase Activity	6	6	6	6	6	6	6	6	6	6	6	6	6	6	6	6	6	6	6	6	6	6	6	6	6	6	6	6	6	6	6	6	6	6	6	6	6	6	6	6	6	6	6	6	6	6	6	6
	CE-Pg Remodelling-Murein Transglycosylase Activity	4	4	4	4	4	4	4	5	4	4	5	4	4	4	4	4	4	4	4	4	4	4	4	4	4	4	4	5	4	4	4	4	4	4	4	4	4	4	5	4	4	5	4	4	5	4	4	4
	CE-Pg Remodelling-Murein-Endopeptidase Activity|Lipoprotein	2	2	2	2	2	2	2	2	2	2	2	2	2	2	2	2	2	2	2	2	2	2	2	2	2	2	2	2	2	2	2	2	2	2	2	2	2	2	2	2	2	2	2	2	2	2	2	2
	CE-Pg Remodelling-N-Acetylglucosamine Modification	1	1	1	1	1	1	1	1	1	1	1	1	1	1	1	1	1	1	1	1	1	1	1	1	1	1	1	1	1	1	1	1	1	1	1	1	1	1	1	1	1	1	1	1	1	1	1	1
	CE-Pg Remodelling-N-Acetylmuramate Modification	11	11	12	12	12	12	11	11	11	12	11	11	11	11	11	12	11	12	12	12	11	11	12	12	11	12	11	11	12	11	12	11	11	12	11	12	12	11	11	11	11	11	11	11	11	12	12	11
	CE-Pg Remodelling-Penicillin-Binding Proteins	8	8	8	8	8	8	8	8	8	8	8	8	8	8	8	8	8	8	8	8	8	8	8	8	8	8	8	9	8	8	8	8	8	8	8	8	8	8	8	8	8	8	8	8	8	8	8	8
	CE-Pg Remodelling-Soluble Lytic Murein Transglycosylase Activity	1	1	1	1	1	1	1	1	1	1	1	1	1	1	1	1	2	1	1	1	1	1	1	1	2	1	1	1	1	1	1	1	1	1	1	1	1	1	1	2	1	1	2	1	1	1	1	1
	CE-Pg Remodelling-Undecaprenol Modification	5	5	5	5	5	5	5	5	5	5	5	5	5	5	5	5	5	5	5	5	5	5	5	5	5	5	5	5	5	5	5	5	5	5	5	5	5	5	5	5	5	5	5	5	5	5	5	5
	CE-QSR Virulence Regulatory System	3	3	3	3	3	3	3	3	3	3	3	3	3	3	3	3	3	3	3	3	3	3	3	3	3	3	3	3	3	3	3	3	3	3	1	2	3	3	3	3	3	3	3	3	3	3	3	3
	CE-QSR-3-Oh PAME Percipitation|Signalling	3	3	3	3	3	3	3	3	3	3	3	3	3	3	3	3	3	3	3	3	3	3	3	3	3	3	3	3	3	3	3	3	3	3	3	3	3	3	3	3	3	3	3	3	3	3	3	3
	CE-QSR-AI-1 LasI Percipitation|Signalling|AHL|NAHL	4	4	4	3	3	4	4	4	4	4	4	4	4	4	4	4	3	3	4	4	4	4	4	3	3	4	3	3	4	4	4	3	3	4	4	4	4	3	3	3	3	4	3	4	3	4	4	4
	CE-QSR-AI-1 Percipitation|AHL|NAHL	1	1	1	1	1	1	1	1	1	1	1	1	1	1	1	1	1	1	1	1	1	1	1	1	1	1	1	1	1	1	1	1	1	1	0	1	1	1	1	1	1	1	1	1	1	1	1	1
	CE-QSR-AI-1 TofI Percipitation|Signalling|AHL|NAHL	1	1	1	1	1	1	1	1	1	1	1	1	1	1	1	1	1	1	1	1	1	1	1	1	1	1	1	1	1	1	1	1	1	1	0	1	1	1	1	1	1	1	1	1	1	1	1	1
	CE-QSR-AI-1 traI Percipitation|Signalling|AHL|NAHL	0	0	0	0	0	0	0	0	0	0	0	0	0	0	0	0	0	0	0	0	0	0	0	0	0	0	0	0	0	0	0	0	0	0	0	0	0	0	0	0	0	0	0	0	0	0	0	0
	CE-QSR-AI-1|AI-2|CAI-1 Perception|Signalling	2	2	2	2	2	2	2	2	2	2	2	2	2	2	2	2	2	2	2	2	2	2	2	2	2	2	2	2	2	2	2	2	2	2	2	2	2	2	2	2	2	2	2	2	2	2	2	2
	CE-QSR-AI-1|AI-2|CAI-1perception|Signalling	0	0	0	0	0	0	0	0	0	0	0	0	0	0	0	0	1	0	0	0	0	0	0	0	0	0	0	0	0	0	0	0	0	0	0	0	0	0	0	1	0	0	1	0	0	0	0	0
	CE-QSR-AI-2 Biosynthesis	0	0	0	0	0	0	0	0	0	0	0	0	0	0	0	0	0	0	0	0	0	0	0	0	0	0	0	1	0	0	0	0	0	0	0	0	0	0	0	0	0	1	0	1	0	0	0	0
	CE-QSR-AI-2 Percipitation|Signalling	1	1	1	1	1	1	1	1	1	1	1	1	1	1	1	1	1	1	1	1	1	1	1	1	1	1	1	1	1	1	1	1	1	1	0	1	1	1	1	1	1	1	1	1	1	1	1	1
	CE-QSR-BDSF Percipitation|Signalling	0	0	1	0	0	0	0	0	0	0	0	0	0	0	0	0	0	0	0	0	0	0	0	0	0	0	0	0	0	0	0	0	0	0	0	0	0	0	0	0	0	0	0	0	0	0	0	0
	CE-QSR-GABA Percipitation|Signalling	10	10	10	11	10	10	7	7	7	7	7	10	10	8	11	10	9	11	10	11	7	7	11	10	10	10	11	10	10	7	10	11	11	7	7	7	10	10	10	11	11	7	11	10	10	10	10	7
	CE-QSR-HHQ|PQS Biosynthesis	3	3	3	3	3	3	3	3	3	3	3	3	4	3	4	3	3	3	3	4	3	3	4	3	3	3	3	3	3	3	3	4	3	3	3	3	3	3	4	3	3	3	3	3	3	3	4	3
	CE-QSR-Inorganic Phosphatase	1	1	1	1	1	1	1	1	1	1	1	1	1	1	1	1	1	1	1	1	1	1	1	1	1	1	1	1	1	1	1	1	1	1	1	1	1	1	1	1	1	1	1	1	1	1	1	1
	CE-QSR-Other Quorum Sensing Regulated Genes	1	1	1	1	1	1	1	2	1	1	1	1	1	1	1	1	1	1	1	1	1	1	1	1	1	1	1	1	1	1	1	1	1	1	0	1	1	1	1	1	1	1	1	1	1	1	1	1
	CE-QSR-Pentapeptide Percipitation|Signalling	1	1	0	0	0	0	1	1	1	1	1	0	0	1	1	0	1	0	0	1	1	1	1	1	0	0	1	0	0	1	1	0	0	1	1	1	0	0	1	0	0	1	0	1	1	0	0	1
	CE-QSR-Pentapeptide Transport	10	10	10	10	10	10	10	10	10	10	10	10	10	10	10	10	10	10	10	10	10	10	10	10	10	10	10	10	10	10	10	10	10	10	10	10	10	10	11	10	10	10	10	10	10	10	10	10
	CE-QSR-Putative Transporter	10	11	10	9	11	10	9	9	11	10	10	10	11	11	9	10	9	9	10	11	9	9	11	10	9	10	9	9	10	10	9	11	9	10	11	11	10	9	11	9	9	10	9	11	10	10	11	9
	CE-QSR-Quorum Sensing Regulated FLS	6	6	6	6	6	6	6	6	6	7	6	6	6	6	6	6	6	6	6	6	6	6	6	6	6	6	6	6	6	6	6	6	6	7	6	6	6	6	6	6	6	6	6	6	6	6	6	6
	CE-QSR-Unknown AI Percipitation-DPP-Mediated Pathway	0	0	0	0	0	0	0	0	0	0	0	0	0	0	0	0	0	0	0	0	0	0	0	0	0	0	0	0	0	0	0	0	0	0	0	0	0	0	0	0	0	0	0	0	0	0	0	0
	CE-QSR|BF-amino Acid Signalling	13	12	13	13	13	12	14	13	13	14	13	12	12	14	13	14	14	13	13	12	14	14	12	12	12	13	13	12	14	13	12	12	13	13	13	13	12	12	13	13	13	12	13	13	12	13	12	14
	CE-QSR|BF-bara|Uvry-csr System	4	4	4	4	4	4	4	4	4	4	4	5	4	4	4	4	4	4	4	3	4	4	3	3	3	4	4	4	4	4	3	3	4	4	4	4	4	3	3	4	4	4	4	4	4	4	3	4
	CE-QSR|BF-biofilm-high Cell Density Regulator	0	0	0	0	0	0	0	0	0	0	0	0	0	0	0	0	0	0	0	0	0	0	0	0	0	0	0	0	0	0	0	0	0	0	0	0	0	0	0	0	0	0	0	0	0	0	0	0
	CE-QSR|BF-biofilm-lowcell Density Regulator	3	3	3	2	3	3	3	3	3	2	3	3	3	3	3	3	5	2	3	3	3	3	3	3	3	3	4	3	3	3	3	3	4	2	3	3	3	3	3	3	3	3	3	3	3	3	3	3
	CE-QSR|BF-c-di-GMP Signalling Pathway	31	29	30	29	30	30	29	31	31	33	28	30	28	31	29	30	28	28	31	29	30	30	28	30	30	30	28	30	30	28	30	30	29	31	32	31	30	28	30	28	29	29	28	31	30	31	29	30
	CE-QSR|BF-cAMP|Crp Signalling Pathway	4	4	4	4	3	3	4	4	4	4	4	4	4	4	4	3	4	4	3	4	4	4	4	4	4	4	4	4	3	4	4	4	4	4	4	4	4	4	4	4	4	4	4	5	4	4	4	4
	CE-QSR|BF-cAMP|Vfr Signalling Pathway	5	5	5	6	5	6	7	5	7	6	7	6	4	7	6	5	6	6	6	6	7	7	6	6	5	5	6	5	5	7	6	6	6	6	6	6	5	6	5	6	6	5	6	5	5	5	6	7
	CE-QSR|BF-curli Biosynthesis	0	0	0	0	0	0	0	0	0	0	0	0	0	0	0	0	4	0	0	0	0	0	0	0	0	0	0	0	0	0	0	0	0	0	0	0	0	0	0	4	0	0	4	0	0	0	0	0
	CE-QSR|BF-envelope Stress Signalling	1	0	2	1	1	1	1	1	1	1	1	0	0	1	1	1	1	1	1	1	1	1	0	1	1	1	1	1	1	1	1	1	1	1	1	1	1	0	0	1	1	1	1	1	1	1	1	1
	CE-QSR|BF-gac|Rsm Pathway	8	8	8	9	9	8	8	9	8	8	9	8	9	8	9	9	9	10	9	9	8	8	9	9	10	9	8	17	9	8	14	9	9	8	10	9	9	9	9	9	9	8	9	8	10	8	9	8
	CE-QSR|BF-oxidative Stress Signalling	7	7	7	7	7	7	7	7	7	7	7	7	7	7	7	7	7	7	7	7	7	7	7	7	7	7	7	7	7	7	7	7	7	7	7	7	7	7	7	7	7	7	7	7	7	7	7	7
	CE-Quorum Quenching-Ahl-Degradation	0	1	0	0	0	0	0	0	0	0	1	0	0	0	0	0	0	0	0	0	0	0	0	0	0	0	0	0	0	1	0	0	0	0	0	0	0	0	0	0	0	0	0	0	0	0	0	0
	CE-Remodelling-Colanic Acid Metabolism	2	2	1	2	1	1	2	2	1	1	1	1	1	1	2	1	1	2	1	1	2	2	1	1	1	1	1	1	1	1	1	1	1	1	1	1	1	1	1	1	1	1	1	2	1	1	1	2
	CE-Remodelling-GPL-Acyltransferase Activity	1	1	1	1	1	1	1	1	1	1	1	1	1	1	1	1	1	1	1	1	1	1	1	1	1	1	1	1	1	1	1	1	1	1	1	1	1	1	1	1	1	1	1	1	1	1	1	1
	CE-Remodelling-GPL-Dehydrogenase Activity	1	1	1	1	1	1	1	1	1	1	1	1	1	1	1	1	1	1	1	1	1	1	1	1	1	1	1	1	1	1	1	1	1	1	1	1	1	1	1	1	1	1	1	1	1	1	1	1
	CE-Remodelling-GPL-Diacylglycerol Kinase Activity	3	3	3	3	3	3	3	3	3	3	3	3	3	3	3	3	3	3	3	3	3	3	3	3	3	3	3	3	3	3	3	3	3	3	3	3	3	3	3	3	3	3	3	3	3	3	3	3
	CE-Remodelling-GPL-Glycerophospholipid-Ethanolamine Ammonia-Lyase Activity	2	2	2	2	2	2	2	2	2	2	2	2	2	2	2	2	2	2	2	2	2	2	2	2	2	2	2	2	2	2	2	2	2	2	2	2	2	2	2	2	2	2	2	2	2	2	2	2
	CE-Remodelling-GPL-Lysophospholipase Activity	1	1	1	1	1	1	1	1	1	1	1	1	1	1	1	1	1	1	1	1	1	1	1	1	1	1	1	1	1	1	1	1	1	1	1	1	1	1	1	1	1	1	1	1	1	1	1	1
	CE-Remodelling-GPL-Phosphatase Activity	1	1	1	1	1	1	1	1	1	1	1	1	1	1	1	1	1	1	1	1	1	1	1	1	1	1	1	1	1	1	1	1	1	2	1	1	1	1	1	1	1	1	1	1	1	1	1	1
	CE-Remodelling-GPL-Phosphatidylglycerol Lysyltransferase	2	2	2	2	2	2	2	2	2	2	2	2	2	2	2	2	2	2	2	2	2	2	2	2	2	2	2	2	2	2	2	2	2	2	2	2	2	2	2	2	2	2	2	2	2	2	2	2
	CE-Remodelling-GPL-Phosphatidyltransferase Activity	2	2	2	2	2	2	2	2	2	2	4	2	2	2	2	2	2	2	2	2	2	2	2	2	2	2	2	2	2	4	2	2	2	2	2	2	2	2	2	2	2	2	2	2	2	2	2	2
	CE-Remodelling-GPL-Reductase Activity	1	1	1	1	1	1	1	1	1	1	1	1	1	1	1	1	1	1	1	1	1	1	1	1	1	1	1	1	1	1	1	1	1	1	1	1	1	1	1	1	1	1	1	1	1	1	1	1
	CE-Remodelling-Glycerolipid Acyltransferase Activity	7	7	7	7	7	7	8	8	8	8	8	7	8	8	8	8	8	7	7	7	8	8	7	8	8	7	8	8	8	7	7	8	7	7	7	7	7	8	8	8	8	7	8	7	7	7	8	8
	CE-Remodelling-Glycerolipid Dehydrogenase|Dehydratase Activity	2	2	2	2	2	2	2	2	2	2	2	2	2	2	2	2	2	2	2	2	2	2	2	3	2	2	2	2	2	2	2	2	2	2	2	2	2	2	2	2	2	2	2	2	2	2	2	2
	CE-Remodelling-Glycerolipid Kinase Activity	2	2	2	2	2	2	2	2	2	2	2	2	2	2	2	2	2	2	2	2	2	2	2	2	2	2	2	2	2	2	2	2	2	2	2	2	2	2	2	2	2	2	2	2	2	2	2	2
	CE-Remodelling-Glycerolipid Lipase Activity	3	3	3	3	3	3	2	3	3	3	3	2	3	3	3	3	3	3	3	3	2	2	3	3	2	3	3	2	3	3	2	3	3	4	4	3	2	3	3	3	3	3	3	3	2	3	3	2
	CE-Remodelling-Glycosyltransferase Activity	1	0	0	0	0	0	0	1	0	1	0	0	0	0	1	0	1	0	1	0	0	0	0	0	0	0	1	0	0	1	1	1	1	1	0	0	0	0	0	1	1	1	1	1	0	0	0	0
	CE-Remodelling-L-Rhamnosyltransferase Activity	1	1	1	1	1	1	1	1	1	1	1	2	1	1	1	1	1	1	1	1	1	1	1	1	1	1	1	2	1	1	2	1	1	1	1	1	1	1	1	1	1	1	1	1	1	1	1	1
	CE-Remodelling-LPS-3-Acetamido-3|6-dideoxy-alpha-D-Galactopyranose Modification	0	0	0	0	0	0	0	0	1	1	0	0	0	1	0	0	1	0	0	0	0	0	0	0	0	0	0	0	0	0	0	0	0	1	0	0	0	0	0	1	0	0	1	0	0	0	0	0
	CE-Remodelling-LPS-6-Deoxy-D-Talose Modification	0	0	0	0	0	0	0	0	0	0	0	0	0	0	0	0	0	0	0	0	0	0	0	0	0	0	0	0	0	0	0	0	0	0	0	1	0	0	0	0	0	0	0	0	0	0	1	0
	CE-Remodelling-LPS-8-Amino-3|8-dideoxy-D-Manno-Octulosonic Acid Modification	5	5	5	5	5	5	5	5	5	5	5	5	5	5	5	5	5	5	5	5	5	5	5	5	5	5	5	5	5	5	5	5	5	5	5	5	5	5	5	5	5	5	5	5	5	5	5	5
	CE-Remodelling-LPS-D-Fucnac Modification	0	0	0	0	0	0	0	0	1	1	0	0	0	1	0	0	1	0	0	0	0	0	0	0	0	0	0	0	0	0	0	0	0	1	0	0	0	0	0	1	0	0	1	0	0	0	0	0
	CE-Remodelling-LPS-D-Mannuronic Acid Modification	0	1	1	1	0	0	0	0	2	3	0	0	0	2	0	0	1	1	0	1	0	0	1	1	1	0	0	1	0	0	0	1	0	2	0	1	0	1	1	1	0	0	1	0	1	0	1	0
	CE-Remodelling-LPS-D-Quinac Modification	2	2	2	2	2	2	2	2	1	1	2	2	2	1	1	2	1	2	2	2	2	2	2	2	2	2	2	2	2	2	2	2	3	1	2	2	2	2	2	1	2	2	1	2	2	2	2	2
	CE-Remodelling-LPS-GDP-D-Rhamnose|Deoxy-D-Mannose Modification	1	1	1	1	1	1	1	1	1	1	1	1	1	2	1	1	1	1	1	1	1	1	1	1	1	1	1	1	1	1	1	1	1	1	1	1	1	1	1	1	1	1	1	1	1	1	0	1
	CE-Remodelling-LPS-GDP-Mannose Modification	2	2	2	2	2	2	2	2	2	2	2	2	2	2	2	2	2	2	2	2	2	2	2	2	2	2	2	2	2	2	2	2	2	2	2	2	2	2	2	2	2	2	2	2	2	2	2	2
	CE-Remodelling-LPS-Glucosamine Modification	1	1	2	2	2	1	2	1	1	1	1	1	1	1	1	1	1	2	1	1	2	2	1	1	2	2	1	1	1	1	1	1	1	1	1	3	1	1	1	1	1	1	1	1	1	2	1	2
	CE-Remodelling-LPS-L Ara4n Modification	0	0	0	0	0	0	0	0	0	0	0	0	0	0	0	0	0	0	0	0	0	0	0	0	0	0	0	0	0	0	0	0	0	0	0	1	1	0	0	0	0	0	0	0	0	0	0	0
	CE-Remodelling-LPS-L Fucnam Modification	0	0	0	0	0	0	0	0	0	0	0	0	0	0	1	0	0	0	0	0	0	0	0	0	0	0	0	0	0	0	0	0	0	0	0	0	0	0	0	0	0	0	0	0	0	0	0	0
	CE-Remodelling-LPS-Manno-Heptose|-phosphate Modification	3	3	3	3	3	4	3	3	4	4	3	3	3	4	3	3	3	3	3	4	3	3	4	4	4	3	3	4	3	3	3	4	3	4	3	4	3	4	4	3	3	3	3	3	4	3	4	3
	CE-Remodelling-LPS-N-Acetylviosamine Modification	0	0	0	0	0	0	0	0	0	0	0	0	0	0	0	0	0	0	0	0	0	0	0	2	0	0	0	0	0	0	0	0	0	0	0	0	0	0	0	0	0	0	0	0	0	0	0	0
	CE-Remodelling-LPS-O-Antiogen Biosynthesis	14	13	13	13	13	13	14	14	15	15	12	13	14	14	14	12	14	13	11	13	14	14	13	12	13	13	13	14	12	13	13	12	12	14	13	12	13	13	13	14	12	13	14	14	13	13	13	14
	CE-Remodelling-LPS-Paratose|Trylose|Abequose|Ascarylose Modification	2	2	2	2	2	2	2	2	2	2	2	2	2	2	2	2	2	2	2	2	2	2	2	2	2	2	2	2	2	2	2	2	2	2	2	2	2	2	2	2	2	2	2	2	2	2	2	2
	CE-Remodelling-LPS-Pseudaminic Acid Modification	2	2	2	2	2	2	2	2	2	2	2	2	2	2	2	2	2	2	2	2	2	2	2	2	2	2	2	2	2	2	2	2	2	2	2	2	2	2	2	2	2	2	2	2	2	2	2	2
	CE-Remodelling-LPS-Putative Trylose Derivates Modification	5	4	4	4	5	4	5	5	5	5	4	4	4	5	4	4	5	4	4	4	5	5	4	4	4	4	4	5	4	4	4	4	4	5	4	4	4	4	4	5	4	4	5	5	4	4	4	5
	CE-Remodelling-LPS-Transport	11	11	11	11	11	11	11	11	9	9	11	11	11	9	9	11	9	11	9	11	11	11	11	12	11	11	11	11	11	11	11	9	11	9	11	11	11	11	11	9	11	11	9	11	11	11	11	11
	CE-Remodelling-LPS-UDP-Galactose-Glucuronate Pool Modification	3	2	2	3	3	2	2	2	2	2	2	3	2	2	3	4	3	3	3	2	2	2	2	1	2	2	4	3	4	2	3	2	3	3	2	3	2	1	2	2	3	3	2	3	2	2	2	2
	CE-Remodelling-LPS-dTDP-Fuc4nac Modification	0	0	0	0	1	0	0	0	0	0	0	0	0	0	0	0	0	0	1	1	0	0	1	0	0	0	0	0	0	0	0	1	0	0	0	0	0	0	1	0	0	0	0	0	0	0	0	0
	CE-Remodelling-Lipid A Metabolism	13	13	13	13	13	13	13	13	13	13	13	13	13	13	13	13	13	13	13	13	13	13	13	13	13	13	13	13	13	13	13	13	13	13	13	13	13	13	13	13	13	13	13	13	13	13	13	13
	CE-Remodelling-Lipoprotein Metabolsim	9	9	9	9	9	9	9	9	9	9	9	9	9	9	9	9	9	9	9	9	9	9	9	9	9	9	9	9	9	9	9	9	9	9	10	9	9	9	9	9	9	9	9	9	9	9	9	9
	CE-Remodelling-Lipoprotein Transport	3	3	3	3	3	3	3	3	3	3	3	3	3	3	3	3	3	3	3	3	3	3	3	3	3	3	3	3	3	3	3	3	3	3	3	3	3	3	3	3	3	3	3	3	3	3	3	3
	CE-Remodelling-Mannosyltransferase Activity	0	0	0	1	0	0	0	1	0	0	0	1	1	0	1	0	0	1	0	1	0	0	1	1	1	0	0	0	0	0	1	1	1	0	0	0	1	1	1	0	1	1	0	0	0	0	1	0
	CE-Remodelling-O-Methyl Phosphoramidate Modification	0	0	0	0	0	0	0	0	0	0	1	0	0	0	0	0	0	0	0	0	0	0	0	0	0	0	0	0	0	1	0	0	0	0	0	0	0	0	0	0	0	0	0	0	0	0	0	0
	CE-Remodelling-Phosphatidylinositol Glycosyltransferases	0	0	0	0	1	0	0	0	0	0	0	0	0	0	0	0	0	0	0	0	0	0	0	0	0	0	0	0	0	0	0	0	0	0	0	0	0	0	0	0	0	0	0	0	0	0	0	0
	CE-Remodelling-Phosphatidylinositol Mannoside Biosynthesis	2	2	2	3	2	2	2	2	2	2	2	3	2	3	2	2	2	3	2	2	2	2	2	3	2	2	2	3	2	2	2	3	3	2	3	3	3	2	2	2	2	2	2	2	2	2	2	2
	CE-Remodelling-S-Layer Glycoprotein Decoration	1	1	1	1	1	1	1	1	1	1	1	1	1	1	1	1	1	1	1	1	1	1	1	1	1	1	1	1	1	1	1	1	1	1	1	1	1	1	1	1	1	1	1	1	1	1	1	1
	CE-Remodelling-Teichoic Acid Metabolism	1	1	1	1	1	1	1	1	1	1	1	1	1	1	1	1	1	1	1	1	1	1	1	1	1	1	1	1	1	1	1	1	1	1	1	1	1	1	1	1	1	1	1	1	1	1	1	1
	CE-Remodelling-Teichuronic Acid Transport	1	1	1	1	1	1	1	1	1	1	1	1	1	1	1	1	1	1	1	1	1	1	1	0	1	1	1	1	1	1	1	1	1	1	1	1	1	0	1	1	1	1	1	1	1	1	1	1
	CE-Sec-Srp Core Components	2	2	2	2	2	2	2	2	2	2	2	2	2	2	2	2	2	2	2	2	2	2	2	2	2	2	2	2	2	2	2	2	2	2	2	2	2	2	2	2	2	2	2	2	2	2	2	2
	CE-Spore Coat Protein	1	1	1	1	1	1	1	1	1	1	2	1	2	1	2	1	1	1	2	2	1	1	2	2	2	1	1	2	1	1	1	2	1	1	1	2	1	3	2	2	1	1	2	1	2	1	2	1
	CE-Spore Maturation Protein	0	0	0	0	0	0	0	0	1	1	1	0	0	1	0	0	0	0	0	0	0	0	0	0	0	0	0	0	0	1	0	0	0	1	1	0	1	0	0	0	0	0	0	0	0	0	0	0
	CE-Sporulation Regulation	1	1	2	1	1	1	1	1	2	1	1	1	1	1	1	1	1	1	1	1	1	1	1	1	1	1	1	1	1	1	1	1	1	2	2	1	1	1	2	1	1	1	1	1	1	1	1	1
	CE-Stage I Sporulation	2	2	2	2	2	2	2	2	2	2	2	2	2	2	2	2	2	2	2	2	2	2	2	2	2	2	2	2	2	2	2	2	2	2	2	2	2	2	2	2	2	2	2	2	2	2	2	2
	CE-Stage V Sporulation	2	1	2	1	2	2	2	2	2	2	1	2	1	2	1	2	1	1	2	1	2	2	1	2	1	2	1	1	2	2	2	1	1	2	2	2	2	2	1	1	1	2	1	2	1	2	1	2
	CE-T2ss-Competence-Related Dna Transformation Transport	5	5	6	5	5	5	5	5	6	5	5	6	6	6	6	5	5	5	6	5	5	5	5	5	5	6	6	5	5	5	5	5	7	7	5	6	6	5	5	6	5	5	6	6	5	6	5	5
	CE-T2ss-General Secretion Pathway	3	3	3	2	2	2	3	3	2	3	2	3	3	3	2	3	6	2	3	3	3	3	3	3	2	3	3	3	3	3	2	3	2	2	0	3	2	3	3	6	2	2	6	2	2	3	3	3
	CE-T2ss-MshA Pilus Biogenesis	0	0	0	0	0	0	0	0	0	0	0	0	0	0	0	0	0	1	0	0	0	0	0	0	0	0	0	0	0	0	0	0	0	0	1	0	0	1	0	0	1	0	0	0	0	0	0	0
	CE-T2ss-Tight Adherence Export	1	1	1	1	1	1	1	1	1	1	1	1	1	1	1	1	1	1	1	1	1	1	1	1	1	1	1	1	1	1	1	1	1	1	1	1	1	1	1	1	1	1	1	1	1	1	1	1
	CE-T2ss-Type IV Pilin Secretion|Fimbrial Assembly	18	19	19	19	19	19	19	18	18	18	19	19	19	18	19	19	19	22	19	19	19	19	19	19	19	19	19	18	19	18	19	19	19	18	19	18	19	20	19	19	20	19	19	18	19	19	19	19
	CE-T3ss-Flagellar Export Apparatus	6	6	6	6	6	6	6	6	6	6	6	6	6	6	6	6	6	6	6	6	6	6	6	6	6	6	6	6	6	6	6	6	6	6	6	6	6	6	6	6	6	6	6	6	6	6	6	6
	CE-T4ss-Conjugal Dna-Protein Transfer	0	0	0	0	0	0	0	0	0	0	0	0	0	0	0	0	0	0	0	0	0	0	0	0	0	0	0	0	0	0	0	0	0	0	1	0	0	1	0	0	2	1	0	0	0	0	0	0
	CE-T4ss-Conjugal Transfer Pilus Assembly Protein	3	10	6	5	3	4	3	4	3	4	4	3	5	3	3	4	3	5	4	3	3	3	3	4	3	4	4	3	4	3	4	4	3	3	5	3	3	4	3	3	3	3	4	3	3	4	4	3
	CE-T4ss-Icm|Dot Secretion System	0	0	0	0	0	0	0	0	0	0	0	0	0	0	0	0	0	13	0	0	0	0	0	0	0	0	0	0	0	0	0	0	0	0	15	0	0	15	0	0	0	0	0	0	0	0	0	0
	CE-T4ss-Trb Secretion System	2	3	2	2	2	2	2	2	2	2	2	2	2	2	2	2	2	2	2	2	2	2	2	2	2	2	2	2	2	2	2	2	2	2	3	2	2	3	2	2	3	2	2	2	2	2	2	2
	CE-T5a Autotransporter Secretion	7	7	7	7	7	7	7	7	7	8	7	7	7	8	7	7	7	7	7	7	7	7	7	7	8	7	8	7	7	7	7	7	7	8	6	7	7	7	7	7	7	7	8	7	7	7	7	7
	CE-T5b Two-Partner Secretion	3	3	2	2	2	2	3	3	2	2	0	2	2	2	3	2	2	2	2	3	3	3	3	2	2	2	2	3	2	0	2	3	3	2	0	3	3	2	3	2	3	0	2	3	3	2	3	3
	CE-T5c Trimeric Autotransporter Adhesins-Secretion	2	3	11	6	4	6	4	8	1	3	6	3	11	4	5	9	7	8	6	3	7	5	4	9	5	6	11	6	6	4	5	6	5	2	4	3	4	5	4	7	7	5	9	4	6	8	8	3
	CE-Tat-Twin-Arginine Translocation Proteins	3	3	3	3	3	3	3	3	3	3	3	3	3	3	3	3	3	3	3	3	3	3	3	3	3	3	3	3	3	3	3	3	3	3	3	3	3	3	3	3	3	3	3	3	3	3	3	3
	CE-Tss1-Adhesin Transport	11	11	11	11	11	11	11	11	11	11	11	11	11	11	11	11	14	11	11	11	11	11	11	11	11	11	11	11	11	11	11	11	11	11	11	11	11	11	11	11	11	11	11	11	11	11	11	11
	CE-Tss1-Alpha-Hemolysin|Cyclolysin Transport	0	0	0	1	0	0	0	0	0	0	1	0	1	0	1	1	1	1	0	0	0	0	0	1	0	0	1	1	1	1	0	1	1	0	1	0	0	1	1	1	1	0	1	0	1	0	1	0
	CE-Tss1-Hemophore|Metalloprotease Transport	3	3	3	3	3	3	3	3	3	3	3	3	3	3	3	3	3	3	3	3	3	3	3	3	3	3	3	3	3	3	3	3	3	3	3	3	3	3	3	3	3	3	3	3	3	3	3	3
	CE-Tss1-RTX Toxin Transport	1	1	2	1	2	2	1	1	1	1	1	1	2	1	1	2	1	1	2	1	1	1	1	1	1	2	1	1	2	1	1	1	1	1	1	1	1	1	1	1	1	1	1	1	1	2	1	1
	CE-Tss1-Raxab-Raxc Protein	1	1	1	1	1	1	1	1	1	1	1	1	1	1	1	1	1	1	1	1	1	1	1	1	1	1	1	1	1	1	1	1	1	1	1	1	1	1	1	1	1	1	1	1	1	1	1	1
	CE-Type III Secretion Core Apparatus	0	0	0	0	0	0	0	0	0	0	0	0	0	0	0	0	0	0	0	0	0	0	0	0	0	0	0	0	0	0	0	0	0	0	0	0	0	0	0	0	0	0	0	0	0	0	0	0
	CE-Type VI Secretion Proteins	12	13	19	17	21	21	12	16	16	17	18	12	18	16	18	19	17	18	19	17	12	12	17	19	17	21	16	20	19	22	24	18	17	19	26	12	13	19	16	18	17	16	18	12	14	19	18	12
	CE-Type VI Secretion Regulation	3	3	3	3	3	3	3	3	4	3	3	3	3	3	3	3	3	3	3	3	3	3	3	3	3	3	3	3	3	3	3	3	3	3	3	3	3	4	3	3	3	3	3	4	3	3	4	3
	CE-Type VI Secretion Related Proteins	2	2	2	2	2	2	2	2	2	2	2	2	2	2	2	2	2	2	3	2	2	2	2	2	2	2	2	2	2	2	2	3	2	2	2	2	2	2	2	2	2	2	2	2	2	2	2	2
	CE-Type VI Secretion System Biosynthesis	6	6	6	6	6	6	6	6	6	6	6	6	6	6	6	6	6	6	6	6	6	6	6	6	6	6	6	10	6	6	10	6	6	6	6	6	6	6	6	6	6	6	6	6	6	6	6	6
	CE-Type VI Secretion-Ess System	2	3	2	2	2	2	2	2	2	2	3	2	2	2	2	3	2	2	2	2	2	2	2	2	2	2	2	3	2	2	2	2	2	2	2	2	2	3	2	2	2	2	2	2	3	2	2	2
	CO2 Fixation-Phosphoenolpyruvate Carboxylase Biosynthesis	1	1	1	1	1	1	1	1	1	1	1	1	1	1	1	1	1	1	1	1	1	1	1	1	1	1	1	1	1	1	1	1	1	1	1	1	1	1	1	1	1	1	1	1	1	1	1	1
	CO2 Fixation-Rubisco Biosynthesis Regulation	12	10	11	10	11	11	9	10	9	10	8	10	8	10	10	10	11	10	11	11	9	9	11	10	10	11	11	10	10	9	9	9	9	10	13	12	11	11	8	11	11	11	11	12	10	11	8	9
	Cadmium Resistance-Cadmium Transport	2	2	2	2	2	2	2	2	2	2	2	2	2	2	2	2	2	2	2	2	2	2	2	2	2	2	2	2	2	2	2	2	2	2	2	2	2	3	2	2	2	2	2	2	2	2	2	2
	Cbb3-Type Cytochrome C Oxidase	2	2	2	2	2	2	2	2	2	2	2	2	2	2	2	2	2	2	2	2	2	2	2	2	2	2	2	2	2	2	2	2	2	2	2	2	2	2	2	2	2	2	2	2	2	2	2	2
	Chemotaxis Related Proteins	3	3	3	3	3	3	3	3	3	3	3	3	3	3	3	3	3	3	3	4	3	3	3	3	3	3	3	3	3	3	3	3	3	3	3	3	3	4	3	3	3	3	3	3	3	3	3	3
	Chemotaxis Towards Sugars	1	1	1	1	1	1	1	1	1	1	1	1	1	1	1	1	1	1	1	1	1	1	1	1	1	1	1	1	1	1	1	1	1	1	1	1	1	1	1	1	1	1	1	1	1	1	1	1
	Chemotaxis Two Component System Proteins	25	25	25	23	25	25	25	25	24	25	24	25	25	25	23	24	23	23	25	27	25	25	27	25	25	27	24	25	24	24	25	25	24	27	25	26	24	28	26	23	23	25	23	26	25	25	26	25
	Chromate Resistance-Chr Transport System	4	4	5	5	5	5	4	4	4	4	5	4	4	4	5	5	5	5	5	4	4	4	4	5	4	5	5	4	5	5	4	5	5	4	4	4	5	4	4	4	5	4	4	4	4	5	4	4
	Cobalt Resistance-Cobalt Homeostasis	9	9	9	9	9	9	9	9	9	9	9	9	9	9	9	9	9	9	9	9	9	9	9	9	9	9	9	9	9	9	9	9	9	9	9	9	9	9	9	9	9	9	9	9	9	9	9	9
	Cobalt Resistance-Cobalt Transport	0	1	0	0	0	0	1	0	1	1	1	0	1	1	0	0	0	0	0	1	1	1	2	0	1	0	0	0	0	1	1	2	0	3	2	1	2	5	2	0	0	0	0	0	0	0	0	1
	Cobalt Resistance-Related Roteins	1	1	1	1	1	1	1	1	1	1	1	1	1	1	1	1	1	1	1	1	1	1	1	1	1	1	1	1	1	1	1	1	1	1	1	1	1	1	1	1	1	1	1	1	1	1	1	1
	Cold Shock Proteins	6	7	6	6	6	6	6	6	7	7	6	6	6	7	6	6	6	6	6	6	6	6	6	6	6	6	6	6	6	6	6	6	6	7	6	6	6	7	6	6	6	7	6	6	6	6	6	6
	Copper Resistance Mediation	22	34	22	21	22	22	22	22	22	23	22	24	22	22	23	23	22	23	22	30	22	22	29	24	24	23	23	27	22	22	21	28	22	34	29	23	30	33	30	23	21	22	23	23	23	21	21	22
	Copper Resistance-Copper Transport	4	7	4	4	4	4	4	4	4	4	4	4	4	4	4	4	4	4	4	7	4	4	7	4	4	4	4	5	4	4	4	7	4	7	7	4	7	11	7	4	4	4	4	4	4	4	4	4
	Copper Resistance-Related Functions	1	1	1	1	1	1	1	1	1	1	0	1	1	1	1	1	1	1	1	1	1	1	1	0	1	1	1	1	1	1	1	0	1	1	0	1	1	1	0	1	1	1	1	1	1	1	0	1
	Denitrification-Nitrate Reduction	13	13	13	12	13	13	13	13	13	13	13	13	13	13	12	13	13	12	12	13	13	13	13	12	13	13	12	13	13	13	13	13	12	12	13	13	13	13	12	12	12	13	12	13	13	13	13	13
	Denitrification-Nitrate|Nitrite Sensing	5	6	4	4	4	5	6	4	5	5	4	5	6	5	4	4	4	4	4	5	6	6	5	6	5	4	4	6	4	5	5	6	4	5	5	5	5	4	5	4	4	5	4	7	5	4	6	6
	Denitrification-Nitrtate|Nitrite Transport	1	1	1	1	1	1	1	1	1	1	1	1	1	1	1	1	1	1	1	1	1	1	1	1	1	1	1	1	1	1	1	1	1	1	1	1	1	1	1	1	1	1	1	1	1	1	1	1
	Detoxification Of Peroxidized Compounds	46	49	48	47	48	47	47	46	49	49	47	46	49	48	47	48	47	46	48	47	47	47	47	48	46	48	48	45	48	47	48	49	48	49	50	48	47	46	50	45	49	45	45	48	45	48	48	47
	Detoxification Of Superoxide Anion Radicals	4	4	4	4	4	4	4	4	4	4	4	4	4	4	4	4	4	4	4	4	4	4	4	4	4	4	4	4	4	3	4	4	4	5	3	4	4	4	4	4	4	4	4	4	4	4	4	4
	Fluoride Resistance-Fluoride Transport	1	1	1	1	1	1	1	1	1	1	1	1	1	1	1	1	1	1	1	1	1	1	1	1	1	1	1	1	1	1	1	1	1	1	1	1	1	1	1	1	1	1	1	1	1	1	1	1
	Fungicidal-Ansamitocin P-3 Metabolism	0	0	0	0	0	0	0	0	0	0	0	0	0	0	0	0	0	0	0	0	0	0	0	0	0	0	0	0	0	0	0	0	0	0	0	0	0	0	0	0	0	0	0	0	0	0	0	0
	Fungicidal-Ansamitocin|Rifamycin Metabolism	3	3	3	3	3	3	3	3	1	1	1	3	3	1	3	3	3	3	3	3	3	3	3	3	3	3	3	3	3	1	3	3	3	1	3	3	3	3	3	3	3	3	3	3	3	3	3	3
	Fungicidal-Chitinolytic Activities	8	13	7	9	6	8	9	10	7	8	6	8	7	10	8	8	8	10	7	7	10	9	10	8	9	8	9	10	6	8	9	7	7	7	9	9	7	6	9	9	11	9	11	12	7	8	8	9
	Fungicidal-Motility-Mediated Defense Signalling	6	6	6	6	6	6	6	6	6	6	6	6	6	6	6	6	6	6	6	6	6	6	6	6	7	6	6	6	6	6	6	6	6	6	6	6	6	6	6	6	6	6	6	6	6	6	6	6
	Fungicidal-Pelgipeptin Metabolism	0	0	0	1	0	0	0	1	0	0	0	0	0	1	1	0	1	1	0	0	0	0	0	0	0	0	0	0	0	0	0	0	0	0	1	0	0	0	0	1	0	0	1	0	0	0	0	0
	Fungicidal-Polyene Collimomycins Metabolsim	1	1	1	1	1	1	1	1	1	1	1	1	1	1	1	1	1	1	1	1	1	1	1	1	1	1	1	1	1	1	1	1	1	1	1	1	1	1	1	1	1	1	1	1	1	1	1	1
	Fungicidal-Toxoflavin Metabolism	5	5	5	5	5	5	5	5	5	5	6	5	7	5	5	5	5	5	5	6	5	5	5	6	5	5	5	5	5	5	5	6	5	6	7	6	5	6	6	5	5	5	5	5	5	5	7	5
	Gln-Nitrogen Regulatory System	3	3	3	3	3	3	3	3	4	3	4	3	3	3	3	3	3	3	3	3	3	3	3	3	3	3	3	3	3	4	3	3	3	3	4	3	3	3	3	3	3	3	3	3	3	3	3	3
	Gold Resistance-Delftibactin Metabolism	5	6	5	5	5	5	5	5	4	4	4	5	5	4	5	5	4	5	5	5	5	5	5	5	5	5	5	6	5	4	5	5	5	4	5	5	5	5	5	5	5	5	5	5	5	5	5	5
	Heat Affected Lipopolysaccharide Assembly	1	1	1	1	1	1	1	1	1	1	1	1	1	1	1	1	1	1	1	1	1	1	1	1	1	1	1	1	1	1	1	1	1	1	1	1	1	1	1	1	1	1	1	1	1	1	1	1
	Heat Inducible Proteins	2	2	2	2	2	2	2	2	2	2	2	2	2	2	2	2	2	2	2	2	2	2	2	2	2	2	2	2	2	2	2	2	2	2	2	2	2	2	2	2	2	2	2	2	2	2	2	2
	Heat Shock Prtoeins	22	23	23	23	23	24	24	23	23	22	20	22	22	24	23	23	23	26	23	23	24	24	24	23	22	24	22	24	22	21	24	24	22	23	23	22	24	23	24	22	23	23	22	24	22	24	22	24
	Heavy Metal Resistance-Cus Transport System	5	12	5	4	4	5	5	5	5	5	5	5	4	5	5	5	4	5	5	10	5	5	10	5	5	5	5	4	4	5	6	10	4	13	11	5	11	16	10	5	4	5	5	5	5	4	4	5
	Hemophores-Heme|Hemin Transport	3	3	3	3	3	3	3	3	3	3	3	3	3	3	3	3	3	3	3	3	3	3	3	3	3	3	3	3	3	3	3	3	3	3	1	3	3	3	3	3	3	3	3	3	3	3	3	3
	Hemophores-Heme|Hemin Utilisation	2	2	2	2	2	2	2	2	2	2	2	2	2	2	2	2	2	2	2	2	2	2	2	2	2	2	2	2	2	2	2	2	2	2	2	2	2	2	2	2	2	2	2	2	2	2	2	2
	Hemophores-Siroheme	2	2	2	2	2	2	2	2	3	3	2	2	2	3	2	2	2	2	2	3	2	2	3	3	3	2	2	3	2	2	2	3	2	3	3	3	2	3	3	2	2	2	2	2	3	2	3	2
	Herbicidial Stress-Paraquat Stress Reduction	4	4	4	4	4	4	4	4	4	4	4	4	4	4	4	4	4	4	4	4	4	4	4	4	4	5	4	4	4	4	4	4	4	5	4	4	4	4	4	4	4	4	4	4	4	4	4	4
	Herbicidial Stress-Toxoflavin Metabolism	1	0	1	1	1	0	0	1	1	1	1	1	0	1	1	1	1	1	1	1	0	0	1	0	1	1	1	0	1	0	1	0	1	1	1	1	1	1	1	1	1	0	1	1	1	1	0	0
	High Temperatur Regulation	1	1	1	1	1	1	1	1	1	1	1	1	1	1	1	1	1	1	1	1	1	1	1	1	1	1	1	1	1	1	1	1	1	1	1	1	1	1	1	1	1	1	1	1	1	1	1	1
	Host Invasion-Ggdef|Eal|Pac|Pas-domain-containing Protein	12	12	12	13	12	12	12	12	12	12	12	12	12	12	13	13	13	13	12	12	12	12	12	12	12	12	12	13	13	12	12	12	12	12	12	12	13	12	12	12	13	12	12	12	12	12	12	12
	Host Invasion-Host Infection Mediator	3	3	3	3	3	3	3	3	3	3	3	3	3	3	3	3	3	3	3	3	3	3	3	3	3	3	3	3	3	3	3	3	3	3	3	3	3	3	3	3	3	3	3	3	3	3	3	3
	Host Invasion-Invasins	0	0	0	0	0	0	0	0	0	0	0	0	0	0	0	0	0	0	0	0	0	0	0	0	0	0	0	0	0	0	0	0	0	0	0	0	0	0	0	0	0	0	0	0	0	0	0	0
	Host Invasion-Membrane Damaging	1	1	1	1	1	1	1	1	1	1	1	1	1	1	1	1	1	1	1	1	1	1	1	1	1	1	1	1	1	1	1	1	1	1	1	1	1	1	1	1	1	1	1	1	1	1	1	1
	Host Invasion-Phosphatidylcholine Biosynthesis	1	1	1	1	1	1	1	1	1	1	1	1	1	1	1	1	1	1	1	1	1	1	1	1	1	1	1	1	1	1	1	1	1	1	1	1	1	1	1	1	1	1	1	1	1	1	1	1
	Host Invasion-Sam|Queuosine|Lipid Metabolism	5	5	4	4	4	4	5	4	5	4	4	4	4	4	4	4	6	4	4	5	5	5	5	5	4	4	4	5	4	4	5	4	4	5	4	5	5	5	4	4	4	5	4	5	5	5	5	5
	ISR-Acetoin|2|3-butanediol Biosynthesis	1	1	1	1	1	1	1	1	1	1	1	1	1	1	1	1	1	1	1	1	1	1	1	1	1	1	1	1	1	1	1	1	1	1	1	1	1	1	1	1	1	1	1	1	1	1	1	1
	ISR-Ahl|Nahl Biosynthesis	2	2	2	2	2	2	2	2	2	2	2	2	2	2	2	2	2	2	2	2	2	2	2	2	2	2	2	2	2	2	2	2	2	2	2	2	2	2	2	2	2	2	2	2	2	2	2	2
	ISR-Vitamin B1|Thiamin Biosynthesis	6	6	6	6	6	6	6	6	6	6	6	6	6	6	6	6	6	6	6	6	6	6	6	6	6	6	6	6	6	6	6	6	6	6	6	6	6	6	6	6	6	6	6	6	6	6	6	6
	ISR-Vitamin B1|Thiamin Transport	8	7	8	7	8	8	8	8	8	8	8	8	8	8	7	8	7	7	8	8	8	8	8	8	8	8	7	8	8	8	8	8	7	8	8	8	8	8	8	7	7	8	7	8	8	8	8	8
	ISR-Vitamin B2|Riboflavin Biosynthesis	1	2	1	1	1	1	1	1	1	1	1	1	1	1	1	1	1	1	1	1	1	1	1	1	1	1	1	0	1	1	1	1	1	1	1	1	1	1	1	1	1	1	1	1	1	1	1	1
	Insecticidal-Fit-System	2	2	2	2	2	2	2	2	2	3	2	2	2	2	2	2	2	2	4	2	2	2	2	2	2	2	2	2	2	2	2	2	2	2	2	2	2	2	2	2	2	2	2	2	2	2	2	2
	Insecticidal-Gamma-Aminobutyric Acid Biosynthesis	3	3	3	3	3	3	3	3	3	3	3	3	3	3	3	3	3	3	3	3	3	3	3	3	3	3	3	3	3	3	3	3	3	3	3	3	3	3	3	3	3	3	3	3	3	3	3	3
	Insecticidal-Other Insecticidial Toxins	6	3	5	7	5	5	8	8	4	5	9	4	4	5	5	5	9	6	4	6	8	8	6	5	4	5	6	4	5	8	5	6	6	5	3	6	3	4	6	8	5	3	8	6	4	5	4	8
	Iron Acquisition-Iron Uptake Regulation	4	4	4	4	4	4	4	4	4	4	4	4	4	4	4	4	4	4	4	4	4	4	4	4	4	4	4	3	4	3	4	4	4	4	3	3	4	4	4	4	4	4	4	4	4	4	4	4
	Iron Acquisition-Lipoic Acid Chelators	4	4	4	4	4	4	4	4	4	4	4	4	4	4	4	4	4	4	4	4	4	4	4	4	4	4	4	4	4	4	4	4	4	4	4	4	4	4	4	4	4	4	4	4	4	4	4	4
	Iron Homeostasis-Fmn|Dmk|Ppl|Ndh|Eet System	3	3	3	2	3	3	3	3	3	3	3	3	3	3	3	2	2	2	3	4	3	3	3	3	3	3	3	3	2	3	3	2	3	3	3	3	3	3	3	2	2	3	2	3	3	3	3	3
	Iron Homeostasis-Foxabcd	12	12	12	9	12	12	12	12	12	12	12	12	12	12	9	12	9	9	12	12	12	12	12	12	11	12	9	12	12	12	12	12	9	12	12	12	12	12	12	9	9	12	9	12	12	12	12	12
	Iron Homeostasis-Related Proteins	2	2	2	2	2	2	2	2	2	2	2	2	2	2	2	2	2	2	2	2	2	2	2	2	2	2	2	2	2	2	2	2	2	2	2	2	2	2	2	2	2	2	2	2	2	2	2	2
	Iron Resistance-Amphibactin Metabolism	1	1	1	1	1	1	1	1	1	1	1	1	1	1	1	1	2	1	1	1	1	1	1	1	1	1	1	1	1	1	1	1	1	1	1	1	1	1	1	1	1	1	1	1	1	1	1	1
	Iron Resistance-Bacterioferritin-Associated Ferredoxin	2	2	2	2	2	2	2	2	2	2	2	2	2	2	2	2	2	2	2	2	2	2	2	2	2	2	2	2	2	2	2	2	2	2	2	2	2	2	2	2	2	2	2	2	2	2	2	2
	Iron Resistance-Enterobactin|Enterochelin Metabolism	2	2	2	2	2	2	2	2	2	2	2	2	2	2	2	2	2	2	2	2	2	2	2	2	2	2	2	2	2	2	2	2	2	2	2	2	2	2	2	2	2	2	2	2	2	2	2	2
	Iron Resistance-Enterobactin|Enterochelin Transport	3	3	4	3	5	4	3	3	3	3	3	3	4	3	3	4	3	3	4	3	3	3	3	3	3	4	3	3	4	3	3	3	3	3	3	3	3	3	3	3	3	3	3	3	3	4	3	3
	Iron Resistance-Ferrichrome|Ferrioxamine Transport	0	0	1	1	0	1	0	1	1	0	1	0	0	1	1	0	0	1	0	0	0	0	0	0	1	1	1	0	0	0	0	0	1	0	1	0	1	0	1	1	1	1	1	0	1	1	0	0
	Iron Resistance-Feuabc|Yusv-transport Complex	1	1	1	1	1	1	1	1	1	1	1	2	1	1	1	1	2	1	1	1	1	1	1	1	1	1	1	1	1	1	1	1	1	1	1	1	2	1	1	1	1	1	1	1	1	1	1	1
	Iron Resistance-Fmn|Dmk|Ppl|Ndh|Eet System	1	1	1	1	1	1	1	1	1	1	1	1	1	1	1	1	1	1	1	1	1	1	1	1	1	1	1	1	1	1	1	1	1	1	1	1	1	1	1	1	1	1	1	1	1	1	1	1
	Iron Resistance-Hemophores-Heme|Hemin Utilisation	1	1	1	1	1	1	1	1	1	1	1	1	1	1	1	1	1	1	1	1	1	1	1	1	1	1	1	1	1	1	1	1	1	1	1	1	1	1	1	1	1	1	1	1	1	1	1	1
	Iron Resistance-Hemophores-Siroheme	4	4	4	4	4	4	4	4	4	4	4	4	4	4	4	4	4	4	4	4	4	4	4	4	4	4	4	4	4	4	4	4	4	4	4	4	4	4	4	4	4	4	4	4	4	4	4	4
	Iron Resistance-Iron Complex Receptor	3	4	3	3	3	3	3	3	3	3	3	3	3	3	3	3	3	3	3	3	3	3	3	3	3	3	3	3	3	3	3	3	3	3	3	3	3	3	3	3	3	3	3	3	3	3	3	3
	Iron Resistance-Iron Uptake Regulation	21	21	21	21	21	21	21	21	21	21	21	21	21	21	21	21	21	21	21	19	21	21	19	19	19	21	21	19	21	21	21	19	20	21	19	21	21	19	19	21	21	21	21	21	21	21	19	21
	Iron Resistance-Mycobactin Biosynthesis	1	1	1	1	1	1	1	1	1	1	1	1	1	1	1	1	1	1	1	1	1	1	1	1	1	1	1	1	1	1	1	1	1	1	1	1	1	1	1	1	1	1	1	1	1	1	1	1
	Iron Resistance-Other Cytochrome-Related Proteins	2	2	2	2	2	2	2	2	3	2	2	2	2	2	2	2	2	2	2	3	2	2	2	3	2	2	2	2	2	2	2	3	3	2	2	2	2	2	2	2	2	2	2	2	2	2	2	2
	Iron Resistance-Pyochelin Biosynthesis	2	3	1	2	2	2	2	2	2	2	1	1	2	2	2	1	2	2	2	1	2	2	1	1	2	1	2	2	1	2	2	1	2	2	1	1	1	2	1	2	2	1	2	2	2	1	2	2
	Iron Resistance-Related Proteins	1	1	1	1	1	1	1	1	1	1	1	1	1	1	1	1	1	1	1	1	1	1	1	1	1	1	1	1	1	1	1	1	1	1	1	1	1	1	1	1	1	1	1	1	1	1	1	1
	Iron Resistance-Related Proteins Ferritin	3	3	3	3	3	3	3	3	3	3	3	3	3	3	3	3	3	3	3	3	3	3	3	3	3	3	3	3	3	3	3	3	3	3	3	3	3	3	3	3	3	3	3	3	3	3	3	3
	Iron Resistance-Staphyloferrin B Biosynthesis	2	2	2	2	2	2	2	2	2	2	0	2	2	2	2	2	2	2	2	2	2	2	2	2	2	2	2	2	2	0	2	2	2	2	0	2	2	2	2	2	2	2	2	2	2	2	2	2
	Iron Resistance-Yersiniabactin Metabolism	0	0	1	1	1	1	0	0	1	1	1	1	1	1	1	1	1	1	1	0	0	0	0	1	1	1	1	1	1	1	1	1	1	0	1	0	1	1	1	1	1	1	1	0	1	1	0	0
	Iron Transport-Feuabc|Yusv-transport Complex	5	5	5	4	6	5	7	5	5	6	5	5	5	5	5	6	6	4	6	5	7	7	5	5	4	5	4	5	6	6	5	5	4	6	5	5	4	5	4	5	4	4	5	5	4	5	5	7
	Iron Transport-Iron II Transport System	6	6	6	6	6	6	6	6	6	6	6	6	6	6	6	6	6	6	6	6	6	6	6	6	6	6	6	6	6	6	6	6	6	6	6	6	6	6	6	6	6	6	6	6	6	6	6	6
	Iron Transport-Iron III Transport System	8	8	8	8	8	8	8	8	8	8	8	8	8	8	8	8	8	8	8	8	8	8	8	8	8	8	8	8	8	8	8	8	8	8	8	8	8	8	8	8	8	8	8	8	8	8	8	8
	Iron Transport-Other Iron Binding Proteins	2	2	2	2	2	2	2	2	2	2	2	2	2	2	2	2	2	2	2	2	2	2	2	2	2	2	2	2	2	2	2	2	2	2	2	2	2	2	2	2	2	2	2	2	2	2	2	2
	Iron Transport-Vitamin B12 Related Ferrous Uptake	20	21	20	21	20	21	21	20	20	21	17	20	20	20	22	21	21	21	20	22	21	21	22	20	22	20	21	20	20	17	21	20	21	21	12	20	20	21	20	20	21	20	20	21	20	20	20	21
	K-Solubilisation-Acetic Acid Biosynthesis	7	7	7	7	7	7	7	7	7	7	7	7	7	7	6	7	7	7	7	6	7	7	6	6	7	7	7	7	7	7	7	6	7	7	7	6	7	7	7	7	7	7	7	7	7	7	7	7
	K-Solubilisation-Butyric Acid Biosynthesis	4	4	4	4	4	4	4	4	4	4	4	4	4	4	4	4	4	4	4	4	4	4	4	4	4	4	4	4	4	4	4	4	4	4	4	4	4	4	4	4	4	4	4	4	4	4	4	4
	K-Solubilisation-Citric Acid Transport	3	3	3	3	4	3	3	3	3	3	3	3	3	3	3	3	3	3	3	3	3	3	3	3	3	3	3	3	3	3	3	3	3	3	3	3	3	3	4	3	3	3	3	3	3	3	3	3
	K-Solubilisation-D-Gluconate Biosynthesis	0	0	1	0	0	1	0	0	1	0	0	0	0	1	0	1	0	0	0	0	0	0	0	0	0	0	0	0	0	0	0	0	0	0	1	0	0	0	0	0	0	0	0	0	0	0	0	0
	K-Solubilisation-Formic Acid Biosynthesis	1	1	1	1	1	1	1	1	1	1	1	1	1	1	1	1	1	1	1	1	1	1	1	1	1	1	1	1	1	1	1	1	1	1	1	1	1	1	1	1	1	1	1	1	1	1	1	1
	K-Solubilisation-Galactonic Acid Biosynthesis	1	1	1	1	1	1	1	1	1	1	1	1	1	1	1	1	1	1	1	1	1	1	1	1	1	1	1	1	1	1	1	1	1	1	1	1	1	1	1	1	1	1	1	1	1	1	1	1
	K-Solubilisation-Galactonic Acid Transport	2	2	2	2	2	2	2	2	2	2	2	2	2	2	2	2	2	2	2	2	2	2	2	2	2	2	2	2	2	2	2	2	2	2	2	2	2	2	2	2	2	2	2	2	2	2	2	2
	K-Solubilisation-Gluconic Acid-Pqq Pathway	10	10	10	12	10	10	10	9	12	12	12	10	10	12	12	10	12	12	10	10	10	10	10	10	10	10	13	11	10	12	10	10	12	12	10	10	10	10	10	12	12	10	12	11	10	10	10	10
	K-Solubilisation-Lactic Acid Biosynthesis	1	1	1	1	1	1	1	1	1	1	1	1	1	1	1	1	1	1	1	1	1	1	1	1	1	1	1	1	1	1	1	1	1	1	1	1	1	1	1	1	1	1	1	1	1	1	1	1
	K-Solubilisation-Oxalacetic Acid Biosynthesis	1	1	1	1	1	1	1	1	1	1	1	1	1	1	1	1	1	1	1	1	1	1	1	1	1	1	1	1	1	1	1	1	1	1	1	1	1	1	1	1	1	1	1	1	1	1	1	1
	K-Solubilisation-Oxalacetic Acid Transport	3	3	3	3	3	3	4	3	3	4	3	3	4	3	3	3	2	3	4	4	4	4	4	4	3	3	3	3	3	3	3	4	3	3	4	3	4	3	3	3	3	3	3	3	3	3	3	4
	K-Solubilisation-Pyruvic Acid Biosynthesis	10	11	10	11	11	10	10	10	9	9	10	10	9	9	10	11	10	11	11	9	10	10	9	9	9	10	10	9	11	10	9	9	10	9	9	9	10	9	9	10	10	9	10	10	10	10	9	10
	K-Solubilisation-Succinic Acid Acid Biosynthesis	3	3	3	3	3	3	3	3	4	3	3	3	3	3	3	3	3	3	3	3	3	3	3	3	3	3	3	3	3	3	3	3	4	3	3	3	3	3	3	3	3	3	3	3	3	3	3	3
	K-Solubilization-Trk-Uptake System	3	3	3	3	3	3	3	3	3	3	3	3	3	3	3	3	3	3	3	3	3	3	3	3	3	3	3	3	3	3	3	3	3	3	3	3	3	3	3	3	3	3	3	3	3	3	3	3
	Lead Resistance-Lead Homeostasis	2	2	2	2	2	2	2	2	2	2	2	2	2	2	2	2	2	2	2	2	2	2	2	2	2	2	2	2	2	2	2	2	2	2	2	2	2	2	2	2	2	2	2	2	2	2	2	2
	Lead Resistance-Pbr Transport System	1	1	1	1	1	1	1	1	1	1	1	1	1	1	1	1	1	1	1	1	1	1	1	1	1	1	1	1	1	1	1	1	1	1	1	1	1	1	1	1	1	1	1	1	1	1	1	1
	Low Temperature-Related Enzymes	5	6	5	5	5	5	6	6	5	5	5	5	5	5	5	5	5	5	5	5	6	6	5	6	5	5	5	5	5	5	5	5	5	7	6	5	6	5	5	6	5	5	6	5	5	5	6	6
	Manganese Resistance-Mnt Transport System	2	2	2	2	2	2	2	2	2	2	2	2	2	2	2	2	2	2	2	2	2	2	2	2	2	2	2	2	2	2	2	2	2	2	2	2	2	2	2	2	2	2	2	2	2	2	2	2
	Manganese Resistance-Related Protein	2	2	2	2	2	2	2	2	2	2	2	1	2	2	2	2	2	2	2	1	2	2	1	2	2	2	2	2	2	2	2	2	2	2	2	1	2	2	2	2	2	2	2	2	1	2	2	2
	Methyl-Accepting Chemotaxis Proteins	1	1	1	1	1	1	1	1	2	1	2	1	1	1	1	1	1	1	1	1	2	1	1	1	1	1	1	2	1	1	1	1	1	1	1	1	2	1	2	1	1	1	1	1	1	1	1	1
	Motility-Chemosensory Pili System	5	5	4	5	5	5	7	5	6	5	6	6	5	6	4	5	4	6	5	5	6	6	5	5	5	4	5	6	5	6	6	6	5	5	6	6	5	5	5	5	5	5	5	5	5	4	6	6
	Motility-Fimbriae System	4	0	8	4	4	4	4	4	4	4	4	0	0	4	4	4	0	4	4	3	4	5	0	3	4	4	5	4	4	4	4	3	4	4	4	4	5	0	0	4	4	4	4	4	4	4	4	4
	Motility-Flagellum C-Ring	2	2	2	2	2	2	2	2	2	2	2	2	2	2	2	2	2	2	2	2	2	2	2	2	2	2	2	2	2	2	2	2	2	2	2	2	2	2	2	2	2	2	2	2	2	2	2	2
	Motility-Flagellum Chaperones	5	5	5	5	5	5	5	5	5	5	5	5	5	5	5	5	5	5	5	5	5	5	5	5	5	5	5	5	5	5	5	5	5	5	5	5	5	5	5	5	5	5	5	5	5	5	5	5
	Motility-Flagellum Motor|Switch	5	5	5	5	5	5	5	6	5	5	5	6	5	5	5	5	5	5	5	5	5	5	5	5	5	5	5	5	5	5	5	5	5	5	5	5	6	5	5	5	5	5	5	5	5	5	5	5
	Motility-Flagellum M|S|P|L-rings	3	3	3	3	3	3	3	3	3	3	3	3	3	3	3	3	3	3	3	3	3	3	3	3	3	3	3	3	3	3	3	3	3	3	3	3	3	3	3	3	3	3	3	3	3	3	3	3
[truncated: 419 more rows]
[truncated: 26 more columns]

## Sheet: S4
Supplementary Data 4. Raw data for four vegetative growth-related traits scored in in vitro conditions on 8,453 plants of nine accessions of A. thaliana according to 75 treatments (mock treatment and individual inoculations with 74 P. siliginis strains). Raw data are expressed in cm². dbi: day before inoculation; dai: days after inoculation.
[truncated: 8,454 more rows]

[truncated: 5 more sheets: S5, S6, S7, S8, S9]
